# Supplementary material for: Chronic unpredictable mild stress-induced mouse ovarian insufficiency by interrupting lipid homeostasis in the ovary
Source: Front Cell Dev Biol. 2022 Sep 8;10:933674. doi: 10.3389/fcell.2022.933674 (PMC9493201; doi:10.3389/fcell.2022.933674)
Supplement: Supplementary file 1 [file DataSheet3.xlsx]

## Sheet: Sheet1
gene_id	gene_name	transcript_id	GO	KEGG	KO_ENTRY	EC	Description	trans_type	FPKM.T_O_D_12	FPKM.T_O_D_38	FPKM.T_O_D_44	FPKM.T_O_C_17	FPKM.T_O_C_3	FPKM.T_O_C_9	fc	log2(fc)	pval	qval	regulation	significant
ENSMUSG00000094326	Gm10045	ENSMUST00000178657	NA	NA	NA	NA	predicted pseudogene 10045 [Source:MGI Symbol;Acc:MGI:3642098]	transcribed_processed_pseudogene	0.700729	0.336188	0.624797	24.0279	22.4452	23.8829	0.0236187	-5.40393	4.24324e-28	7.0442e-24	down	yes
ENSMUSG00000049421	Zfp260	ENSMUST00000050735;ENSMUST00000149302;ENSMUST00000123095;ENSMUST00000134365;ENSMUST00000108200;ENSMUST00000182136;ENSMUST00000130526	GO:0003676(nucleic acid binding);GO:0003677(DNA binding);GO:0005634(nucleus);GO:0005654(nucleoplasm);GO:0005829(cytosol);GO:0007275(multicellular organism development);GO:0046872(metal ion binding);GO:0046872(metal ion binding)	NA	NA	NA	zinc finger protein 260 [Source:MGI Symbol;Acc:MGI:1347071]	protein_coding;retained_intron;processed_transcript	0.50881	0.569567	0.750743	6.98167	8.01086	5.68937	0.0884406	-3.49915	3.11655e-26	2.58689e-22	down	yes
ENSMUSG00000018909	Arrb1	ENSMUST00000098266;ENSMUST00000032995;ENSMUST00000162290;ENSMUST00000161525;ENSMUST00000179755;ENSMUST00000161268;ENSMUST00000162404;ENSMUST00000162933;ENSMUST00000159642;ENSMUST00000162043	GO:0000187(activation of MAPK activity);GO:0000785(chromatin);GO:0001664(G protein-coupled receptor binding);GO:0001933(negative regulation of protein phosphorylation);GO:0001934(positive regulation of protein phosphorylation);GO:0002031(G protein-coupled receptor internalization);GO:0002092(positive regulation of receptor internalization);GO:0003713(transcription coactivator activity);GO:0005096…	04010(MAPK signaling pathway);04062(Chemokine signaling pathway);04144(Endocytosis);04340(Hedgehog signaling pathway);04740(Olfactory transduction);04926(Relaxin signaling pathway);04928(Parathyroid hormone synthesis, secretion and action);05032(Morphine addiction);05032(Morphine addiction)	K04439	NA	arrestin, beta 1 [Source:MGI Symbol;Acc:MGI:99473]	protein_coding;processed_transcript;retained_intron	1.56014	0.974149	0.87978	8.35695	6.76263	9.68969	0.137613	-2.86132	5.4196e-26	2.99903e-22	down	yes
ENSMUSG00000031876	Gm45711	ENSMUST00000162616	GO:0003674(molecular_function);GO:0008150(biological_process);GO:0016020(membrane);GO:0016021(integral component of membrane)	NA	NA	NA	predicted gene 45711 [Source:MGI Symbol;Acc:MGI:5804826]	nonsense_mediated_decay	0.0001	0.0001	0.0001	1.62685	3.81538	1.32246	4.43479e-05	-14.4608	5.74069e-23	2.38253e-19	down	yes
ENSMUSG00000028527	Ak4	ENSMUST00000151561;ENSMUST00000106946;ENSMUST00000102780;ENSMUST00000106945;ENSMUST00000133055;ENSMUST00000155749;ENSMUST00000131397	GO:0000166(nucleotide binding);GO:0001889(liver development);GO:0002082(regulation of oxidative phosphorylation);GO:0004017(adenylate kinase activity);GO:0004550(nucleoside diphosphate kinase activity);GO:0005524(ATP binding);GO:0005525(GTP binding);GO:0005737(cytoplasm);GO:0005739(mitochondrion);GO:0005759(mitochondrial matrix);GO:0006139(nucleobase-containing compound metabolic process);GO:0006…	00230(Purine metabolism);00730(Thiamine metabolism);00730(Thiamine metabolism)	K00939	EC:2.7.4.3	adenylate kinase 4 [Source:MGI Symbol;Acc:MGI:87979]	processed_transcript;protein_coding	0.709621	0.640835	0.702969	3.89183	5.14546	6.15206	0.135188	-2.88696	5.68326e-17	1.88696e-13	down	yes
ENSMUSG00000008035	Mid1ip1	ENSMUST00000008179;ENSMUST00000115524;ENSMUST00000125623;ENSMUST00000144356;ENSMUST00000156321	GO:0005515(protein binding);GO:0005634(nucleus);GO:0005737(cytoplasm);GO:0005829(cytosol);GO:0005856(cytoskeleton);GO:0005874(microtubule);GO:0006629(lipid metabolic process);GO:0007026(negative regulation of microtubule depolymerization);GO:0008022(protein C-terminus binding);GO:0015630(microtubule cytoskeleton);GO:0042802(identical protein binding);GO:0045723(positive regulation of fatty acid b…	NA	NA	NA	Mid1 interacting protein 1 (gastrulation specific G12-like (zebrafish)) [Source:MGI Symbol;Acc:MGI:1915291]	protein_coding;processed_transcript	41.5361	58.8323	27.5945	131.625	158.266	174.109	0.275782	-1.8584	3.35392e-12	9.27975e-09	down	yes
ENSMUSG00000094932	Gm2007	ENSMUST00000178133;ENSMUST00000177981;ENSMUST00000189494	GO:0003674(molecular_function);GO:0003676(nucleic acid binding);GO:0005575(cellular_component);GO:0005634(nucleus);GO:0006355(regulation of transcription, DNA-templated);GO:0008150(biological_process);GO:0010468(regulation of gene expression);GO:0046872(metal ion binding);GO:0046872(metal ion binding)	NA	NA	NA	predicted gene 2007 [Source:MGI Symbol;Acc:MGI:3780177]	protein_coding	0.0398136	0.0001	0.0001	0.598851	0.666676	0.588164	0.0215859	-5.53377	2.78889e-11	6.61405e-08	down	yes
ENSMUSG00000055320	Tead1	ENSMUST00000059768;ENSMUST00000170352;ENSMUST00000069256;ENSMUST00000239404;ENSMUST00000171373;ENSMUST00000106638;ENSMUST00000172065;ENSMUST00000084705;ENSMUST00000164363;ENSMUST00000171197;ENSMUST00000167060;ENSMUST00000165036;ENSMUST00000168981;ENSMUST00000168328;ENSMUST00000210510;ENSMUST00000163593;ENSMUST00000239442	GO:0000978(RNA polymerase II cis-regulatory region sequence-specific DNA binding);GO:0001228(DNA-binding transcription activator activity, RNA polymerase II-specific);GO:0003677(DNA binding);GO:0003700(DNA-binding transcription factor activity);GO:0005634(nucleus);GO:0005654(nucleoplasm);GO:0006355(regulation of transcription, DNA-templated);GO:0035329(hippo signaling);GO:0045944(positive regulat…	04390(Hippo signaling pathway);04392(Hippo signaling pathway - multiple species);04392(Hippo signaling pathway - multiple species)	NA	NA	TEA domain family member 1 [Source:MGI Symbol;Acc:MGI:101876]	protein_coding;retained_intron;processed_transcript	2.16117	6.99146	5.99638	0.30075	0.38427	1.22435	7.93403	2.98805	6.08529e-09	1.26277e-05	up	yes
ENSMUSG00000055775	Myh8	ENSMUST00000019625;ENSMUST00000108685;ENSMUST00000108686;ENSMUST00000139052	GO:0000146(microfilament motor activity);GO:0000166(nucleotide binding);GO:0003009(skeletal muscle contraction);GO:0003774(motor activity);GO:0003779(actin binding);GO:0005515(protein binding);GO:0005524(ATP binding);GO:0005737(cytoplasm);GO:0016459(myosin complex);GO:0016887(ATPase activity);GO:0030016(myofibril);GO:0030049(muscle filament sliding);GO:0032982(myosin filament);GO:0046034(ATP meta…	04530(Tight junction);04530(Tight junction)	K10352	NA	myosin, heavy polypeptide 8, skeletal muscle, perinatal [Source:MGI Symbol;Acc:MGI:1339712]	protein_coding;retained_intron	0.62809	0.0001	0.803986	0.0001	0.0001	0.0001	4773.92	12.221	1.01293e-08	1.8684e-05	up	yes
ENSMUSG00000032827	Ppp1r9a	ENSMUST00000035813;ENSMUST00000177456;ENSMUST00000176263;ENSMUST00000164110;ENSMUST00000176136;ENSMUST00000176729;ENSMUST00000177153;ENSMUST00000175889;ENSMUST00000175962;ENSMUST00000168998;ENSMUST00000177338;ENSMUST00000065842	GO:0005515(protein binding);GO:0005737(cytoplasm);GO:0005829(cytosol);GO:0005856(cytoskeleton);GO:0007015(actin filament organization);GO:0007399(nervous system development);GO:0007568(aging);GO:0008022(protein C-terminus binding);GO:0008157(protein phosphatase 1 binding);GO:0010976(positive regulation of neuron projection development);GO:0014069(postsynaptic density);GO:0015629(actin cytoskeleto…	NA	K17551	NA	protein phosphatase 1, regulatory subunit 9A [Source:MGI Symbol;Acc:MGI:2442401]	protein_coding;nonsense_mediated_decay;retained_intron;processed_transcript	3.1929	2.54676	2.51732	0.965431	1.04108	0.805922	2.93589	1.5538	2.65133e-08	4.40147e-05	up	yes
ENSMUSG00000117098	Gm49909	ENSMUST00000233417;ENSMUST00000233357	GO:0001725(stress fiber);GO:0005509(calcium ion binding);GO:0005515(protein binding);GO:0005903(brush border);GO:0008360(regulation of cell shape);GO:0016459(myosin complex);GO:0016460(myosin II complex);GO:0030018(Z disc);GO:0032036(myosin heavy chain binding);GO:0032991(protein-containing complex);GO:0035254(glutamate receptor binding);GO:0045177(apical part of cell);GO:0046872(metal ion bindin…	NA	NA	NA	predicted gene, 49909 [Source:MGI Symbol;Acc:MGI:6270609]	protein_coding	0.284314	48.3361	74.8374	0.140978	0.312074	0.0001	272.443	8.08981	1.22792e-07	0.000185316	up	yes
ENSMUSG00000092541	Gm20537	ENSMUST00000173131;ENSMUST00000154586	NA	NA	NA	NA	predicted gene 20537 [Source:MGI Symbol;Acc:MGI:5142002]	nonsense_mediated_decay	0.0001	0.00613464	0.0001	2.05279	0.00669845	1.32004	0.00187442	-9.05934	2.56273e-07	0.000354532	down	yes
ENSMUSG00000117856	Gm6937	ENSMUST00000235531	NA	NA	NA	NA	predicted pseudogene 6937 [Source:MGI Symbol;Acc:MGI:3647230]	processed_pseudogene	2.97004	4.69023	0.0001	0.0001	0.0001	0.0001	25534.6	14.6402	3.28748e-07	0.000383858	up	yes
ENSMUSG00000092412	Gm20507	ENSMUST00000163245	NA	NA	NA	NA	predicted gene 20507 [Source:MGI Symbol;Acc:MGI:5141972]	processed_transcript	0.0001	0.749781	0.670542	0.0001	0.0001	0.0001	4734.74	12.2091	3.39611e-07	0.000383858	up	yes
ENSMUSG00000027364	Usp50	ENSMUST00000136319;ENSMUST00000130356;ENSMUST00000145194;ENSMUST00000028842;ENSMUST00000151140	GO:0004843(thiol-dependent ubiquitin-specific protease activity);GO:0005515(protein binding);GO:0005829(cytosol);GO:0006508(proteolysis);GO:0006511(ubiquitin-dependent protein catabolic process);GO:0007032(endosome organization);GO:0007265(Ras protein signal transduction);GO:0008233(peptidase activity);GO:0008234(cysteine-type peptidase activity);GO:0014069(postsynaptic density);GO:0016579(protei…	NA	NA	NA	ubiquitin specific peptidase 50 [Source:MGI Symbol;Acc:MGI:1922333]	nonsense_mediated_decay;protein_coding;processed_transcript;retained_intron	0.0511248	0.042047	0.0473128	7.01841	4.90091	0.0176932	0.0117688	-6.40889	3.46839e-07	0.000383858	down	yes
ENSMUSG00000036826	Igflr1	ENSMUST00000043850;ENSMUST00000172251	GO:0005515(protein binding);GO:0005886(plasma membrane);GO:0008150(biological_process);GO:0016020(membrane);GO:0016021(integral component of membrane);GO:0016021(integral component of membrane)	NA	NA	NA	IGF-like family receptor 1 [Source:MGI Symbol;Acc:MGI:3655979]	protein_coding	0.0001	0.0001	0.0001	0.750377	1.24325	0.0001	0.000150472	-12.6982	7.43775e-07	0.000771713	down	yes
ENSMUSG00000031972	Acta1	ENSMUST00000034453;ENSMUST00000212584	GO:0000166(nucleotide binding);GO:0001725(stress fiber);GO:0005515(protein binding);GO:0005524(ATP binding);GO:0005737(cytoplasm);GO:0005856(cytoskeleton);GO:0005865(striated muscle thin filament);GO:0005869(dynactin complex);GO:0005884(actin filament);GO:0009612(response to mechanical stimulus);GO:0009991(response to extracellular stimulus);GO:0010226(response to lithium ion);GO:0010628(positive…	NA	K10354	NA	actin, alpha 1, skeletal muscle [Source:MGI Symbol;Acc:MGI:87902]	protein_coding	4.11089	0.186009	5.50027	0.14345	0.176189	0.11685	22.4454	4.48835	7.92447e-07	0.000773847	up	yes
ENSMUSG00000076258	Gm23935	ENSMUST00000102303	NA	NA	NA	NA	predicted gene, 23935 [Source:MGI Symbol;Acc:MGI:5453712]	miRNA	708.644	433.571	251.672	4655.64	8386.4	405.554	0.103653	-3.27016	3.13032e-06	0.00288702	down	yes
ENSMUSG00000022255	Mtdh	ENSMUST00000169905;ENSMUST00000022865;ENSMUST00000163333;ENSMUST00000163697;ENSMUST00000172082;ENSMUST00000226992;ENSMUST00000171711;ENSMUST00000170050;ENSMUST00000226331;ENSMUST00000170553;ENSMUST00000172083;ENSMUST00000168991	GO:0000122(negative regulation of transcription by RNA polymerase II);GO:0001085(RNA polymerase II transcription factor binding);GO:0001650(fibrillar center);GO:0003712(transcription coregulator activity);GO:0003713(transcription coactivator activity);GO:0003725(double-stranded RNA binding);GO:0005515(protein binding);GO:0005634(nucleus);GO:0005730(nucleolus);GO:0005737(cytoplasm);GO:0005783(endo…	NA	NA	NA	metadherin [Source:MGI Symbol;Acc:MGI:1914404]	protein_coding;retained_intron;nonsense_mediated_decay;processed_transcript	5.06472	5.28486	5.02034	1.65995	1.6007	3.27614	2.3513	1.23346	8.24655e-06	0.00720532	up	yes
ENSMUSG00000079509	Zfx	ENSMUST00000088102;ENSMUST00000113925;ENSMUST00000130312;ENSMUST00000113927;ENSMUST00000113926;ENSMUST00000135661;ENSMUST00000137853	GO:0001541(ovarian follicle development);GO:0003676(nucleic acid binding);GO:0003677(DNA binding);GO:0005634(nucleus);GO:0005654(nucleoplasm);GO:0005730(nucleolus);GO:0006355(regulation of transcription, DNA-templated);GO:0007281(germ cell development);GO:0007283(spermatogenesis);GO:0009566(fertilization);GO:0009791(post-embryonic development);GO:0035264(multicellular organism growth);GO:0046872(…	NA	NA	NA	zinc finger protein X-linked [Source:MGI Symbol;Acc:MGI:99211]	protein_coding;retained_intron;processed_transcript	0.201608	5.28293	3.82557	0.273125	0.356281	0.24784	10.6129	3.40774	9.064e-06	0.00752357	up	yes
ENSMUSG00000068614	Actc1	ENSMUST00000090269;ENSMUST00000149125	GO:0000166(nucleotide binding);GO:0005515(protein binding);GO:0005524(ATP binding);GO:0005737(cytoplasm);GO:0005856(cytoskeleton);GO:0005869(dynactin complex);GO:0005884(actin filament);GO:0007015(actin filament organization);GO:0010628(positive regulation of gene expression);GO:0015629(actin cytoskeleton);GO:0016887(ATPase activity);GO:0017022(myosin binding);GO:0030017(sarcomere);GO:0030027(lam…	04260(Cardiac muscle contraction);04261(Adrenergic signaling in cardiomyocytes);05410(Hypertrophic cardiomyopathy (HCM));05414(Dilated cardiomyopathy (DCM));05414(Dilated cardiomyopathy (DCM))	NA	NA	actin, alpha, cardiac muscle 1 [Source:MGI Symbol;Acc:MGI:87905]	protein_coding	3.20485	0.789523	2.96122	0.0266205	0.400229	0.0576791	14.3554	3.84352	1.15542e-05	0.00913391	up	yes
ENSMUSG00000080859	Rpl10-ps1	ENSMUST00000119438	NA	NA	NA	NA	ribosomal protein L10, pseudogene 1 [Source:MGI Symbol;Acc:MGI:3650909]	transcribed_processed_pseudogene	7.76112	107.4	66.3872	6.13918	9.07017	11.0649	6.90973	2.78863	1.22624e-05	0.00925313	up	yes
ENSMUSG00000037640	Zfp60	ENSMUST00000167955;ENSMUST00000108336;ENSMUST00000042641;ENSMUST00000130997;ENSMUST00000136373;ENSMUST00000126884;ENSMUST00000141753;ENSMUST00000125228	GO:0003676(nucleic acid binding);GO:0006355(regulation of transcription, DNA-templated);GO:0046872(metal ion binding);GO:0046872(metal ion binding)	05168(Herpes simplex virus 1 infection);05168(Herpes simplex virus 1 infection)	K09228	NA	zinc finger protein 60 [Source:MGI Symbol;Acc:MGI:99207]	protein_coding;nonsense_mediated_decay;retained_intron	0.882969	0.891348	0.858852	2.10193	2.32427	2.20323	0.397193	-1.33209	1.55591e-05	0.0109885	down	yes
ENSMUSG00000100969	1700030N03Rik	ENSMUST00000190575;ENSMUST00000236704;ENSMUST00000235916;ENSMUST00000189643;ENSMUST00000237047;ENSMUST00000190668;ENSMUST00000191405;ENSMUST00000190982;ENSMUST00000190259	NA	NA	NA	NA	RIKEN cDNA 1700030N03 gene [Source:MGI Symbol;Acc:MGI:1917261]	lincRNA	0.0242935	0.0571926	0.0451945	0.258225	0.161624	0.348251	0.164927	-2.6001	1.5886e-05	0.0109885	down	yes
ENSMUSG00000024742	Fen1	ENSMUST00000025651;ENSMUST00000142241;ENSMUST00000116542;ENSMUST00000156291	GO:0000287(magnesium ion binding);GO:0000784(nuclear chromosome, telomeric region);GO:0003677(DNA binding);GO:0003824(catalytic activity);GO:0004518(nuclease activity);GO:0004519(endonuclease activity);GO:0004523(RNA-DNA hybrid ribonuclease activity);GO:0004527(exonuclease activity);GO:0005634(nucleus);GO:0005654(nucleoplasm);GO:0005730(nucleolus);GO:0005739(mitochondrion);GO:0006260(DNA replicat…	03030(DNA replication);03410(Base excision repair);03450(Non-homologous end-joining);03450(Non-homologous end-joining)	K04799	EC:3.-.-.-	flap structure specific endonuclease 1 [Source:MGI Symbol;Acc:MGI:102779]	protein_coding	2.66463	3.94612	4.24453	12.0802	5.76	15.91	0.321635	-1.6365	1.81406e-05	0.0120461	down	yes
ENSMUSG00000106106	CT010467	ENSMUST00000198477	NA	NA	NA	NA	18s RNA, related sequence 5	rRNA	2916.49	1520.75	1148.91	13177.6	20819.8	1514.12	0.157305	-2.66836	2.02116e-05	0.0126861	down	yes
ENSMUSG00000020908	Myh3	ENSMUST00000108689;ENSMUST00000165221;ENSMUST00000007301	GO:0000146(microfilament motor activity);GO:0000166(nucleotide binding);GO:0003009(skeletal muscle contraction);GO:0003774(motor activity);GO:0003779(actin binding);GO:0005515(protein binding);GO:0005516(calmodulin binding);GO:0005524(ATP binding);GO:0005737(cytoplasm);GO:0016459(myosin complex);GO:0016887(ATPase activity);GO:0030016(myofibril);GO:0032982(myosin filament);GO:0043292(contractile f…	04530(Tight junction);04530(Tight junction)	K10352	NA	myosin, heavy polypeptide 3, skeletal muscle, embryonic [Source:MGI Symbol;Acc:MGI:1339709]	protein_coding	0.777236	0.0001	0.703927	0.00870049	0.0090002	0.0001	83.2138	6.37875	2.11945e-05	0.0126861	up	yes
ENSMUSG00000111090	Gm30698	ENSMUST00000214789	NA	NA	NA	NA	predicted gene, 30698 [Source:MGI Symbol;Acc:MGI:5589857]	TEC	0.20269	0.290065	0.343738	0.055987	0.033547	0.045027	6.21646	2.63609	2.15051e-05	0.0126861	up	yes
ENSMUSG00000039117	Taf4	ENSMUST00000227325;ENSMUST00000041618;ENSMUST00000154961;ENSMUST00000155335	GO:0000790(nuclear chromatin);GO:0001046(core promoter sequence-specific DNA binding);GO:0001541(ovarian follicle development);GO:0003677(DNA binding);GO:0005515(protein binding);GO:0005634(nucleus);GO:0005654(nucleoplasm);GO:0005669(transcription factor TFIID complex);GO:0005829(cytosol);GO:0006351(transcription, DNA-templated);GO:0006352(DNA-templated transcription, initiation);GO:0006355(regul…	03022(Basal transcription factors);05016(Huntington disease);05016(Huntington disease)	K03129	NA	TATA-box binding protein associated factor 4 [Source:MGI Symbol;Acc:MGI:2152346]	protein_coding;processed_transcript	5.40954	4.24433	4.52892	8.96019	9.64274	10.4622	0.487966	-1.03515	2.21611e-05	0.0126861	down	yes
ENSMUSG00000113622	Gm49749	ENSMUST00000223212	NA	NA	NA	NA	predicted gene, 49749 [Source:MGI Symbol;Acc:MGI:6215244]	lincRNA	3.22072	0.294581	3.88035	0.222135	0.236504	0.033873	15.0162	3.90845	2.31526e-05	0.0128119	up	yes
ENSMUSG00000044757	Gm6430	ENSMUST00000054664	NA	NA	NA	NA	predicted gene 6430 [Source:MGI Symbol;Acc:MGI:3648857]	processed_pseudogene	22.8961	1.54114	8.26034	1.14987	1.49451	1.69754	7.53067	2.91278	3.11898e-05	0.0167027	up	yes
ENSMUSG00000099021	Rn7s1	ENSMUST00000174924	NA	NA	NA	NA	7S RNA 1 [Source:MGI Symbol;Acc:MGI:97950]	misc_RNA	17.6222	9.18261	4.67696	98.5696	188.239	7.70642	0.106894	-3.22575	3.29658e-05	0.0171021	down	yes
ENSMUSG00000092837	Rpph1	ENSMUST00000175096	NA	NA	NA	NA	ribonuclease P RNA component H1 [Source:MGI Symbol;Acc:MGI:1934664]	ribozyme	4.29895	1.60582	0.865599	26.8714	39.2117	2.52226	0.0986857	-3.34102	3.93657e-05	0.0198033	down	yes
ENSMUSG00000099250	Rn7s2	ENSMUST00000175032	NA	NA	NA	NA	7S RNA 2 [Source:MGI Symbol;Acc:MGI:97953]	misc_RNA	15.2748	9.37537	3.90788	91.793	154.968	6.76122	0.112645	-3.15014	4.3963e-05	0.0214656	down	yes
ENSMUSG00000101013	A630072M18Rik	ENSMUST00000190567	NA	NA	NA	NA	RIKEN cDNA A630072M18 gene [Source:MGI Symbol;Acc:MGI:2444702]	antisense	0.110583	0.124636	0.099983	1.33631	0.133455	0.852044	0.144371	-2.79215	4.61156e-05	0.0218733	down	yes
ENSMUSG00000087370	Tmem170b	ENSMUST00000129449;ENSMUST00000221694	GO:0003674(molecular_function);GO:0005886(plasma membrane);GO:0016020(membrane);GO:0016021(integral component of membrane);GO:0090090(negative regulation of canonical Wnt signaling pathway);GO:0090090(negative regulation of canonical Wnt signaling pathway)	NA	NA	NA	transmembrane protein 170B [Source:MGI Symbol;Acc:MGI:3647046]	protein_coding	0.103966	0.0928263	0.0954593	0.0778239	1.22876	1.01342	0.12597	-2.98885	5.50524e-05	0.025199	down	yes
ENSMUSG00000059824	Dbp	ENSMUST00000080885;ENSMUST00000210120;ENSMUST00000211748;ENSMUST00000211513;ENSMUST00000211357	GO:0000977(RNA polymerase II regulatory region sequence-specific DNA binding);GO:0001228(DNA-binding transcription activator activity, RNA polymerase II-specific);GO:0001889(liver development);GO:0003677(DNA binding);GO:0003700(DNA-binding transcription factor activity);GO:0005634(nucleus);GO:0005654(nucleoplasm);GO:0006355(regulation of transcription, DNA-templated);GO:0006357(regulation of tran…	NA	K09056	NA	D site albumin promoter binding protein [Source:MGI Symbol;Acc:MGI:94866]	protein_coding;retained_intron	14.9073	56.4025	19.8886	10.3772	11.255	8.22999	3.05397	1.61069	5.6163e-05	0.025199	up	yes
ENSMUSG00000049235	Gm7324	ENSMUST00000094051;ENSMUST00000228507	GO:0003676(nucleic acid binding);GO:0003723(RNA binding);GO:0005681(spliceosomal complex);GO:0048026(positive regulation of mRNA splicing, via spliceosome);GO:0048026(positive regulation of mRNA splicing, via spliceosome)	NA	NA	NA	predicted gene 7324 [Source:MGI Symbol;Acc:MGI:3646999]	protein_coding	4.26092	0.61365	5.30348	0.55564	0.61317	0.644322	5.61352	2.4889	0.000105145	0.0447565	up	yes
ENSMUSG00000110430	Cmtm1	ENSMUST00000160596;ENSMUST00000164175;ENSMUST00000159039	GO:0003674(molecular_function);GO:0008150(biological_process);GO:0016020(membrane);GO:0016021(integral component of membrane);GO:0016021(integral component of membrane)	NA	NA	NA	CKLF-like MARVEL transmembrane domain containing 1 [Source:MGI Symbol;Acc:MGI:2447159]	protein_coding	3.07329	2.77924	1.2997	0.263366	0.0796724	0.810836	6.19845	2.63191	0.000123195	0.0511289	up	yes
ENSMUSG00000005615	Pcyt1a	ENSMUST00000079791;ENSMUST00000231920;ENSMUST00000115137;ENSMUST00000104893;ENSMUST00000123199;ENSMUST00000141772;ENSMUST00000141421;ENSMUST00000115140	GO:0003824(catalytic activity);GO:0004105(choline-phosphate cytidylyltransferase activity);GO:0005515(protein binding);GO:0005516(calmodulin binding);GO:0005635(nuclear envelope);GO:0005737(cytoplasm);GO:0005783(endoplasmic reticulum);GO:0005789(endoplasmic reticulum membrane);GO:0005829(cytosol);GO:0005886(plasma membrane);GO:0006629(lipid metabolic process);GO:0006656(phosphatidylcholine biosyn…	00440(Phosphonate and phosphinate metabolism);00564(Glycerophospholipid metabolism);05231(Choline metabolism in cancer);05231(Choline metabolism in cancer)	K00968	EC:2.7.7.15	phosphate cytidylyltransferase 1, choline, alpha isoform [Source:MGI Symbol;Acc:MGI:88557]	protein_coding;retained_intron	8.67242	16.0121	11.6217	4.13624	3.50183	8.06647	2.31183	1.20904	0.000130094	0.0514305	up	yes
ENSMUSG00000118653	AC159819	ENSMUST00000239472	NA	NA	NA	NA	ubiquitin-conjugating enzyme E2S (Ube2s) retrogene	protein_coding	1.1216	1.30506	1.06037	25.8484	2.50327	1.67485	0.116132	-3.10616	0.000130117	0.0514305	down	yes
ENSMUSG00000053080	2700081O15Rik	ENSMUST00000159348;ENSMUST00000161907;ENSMUST00000160561;ENSMUST00000189779;ENSMUST00000159346;ENSMUST00000191580	GO:0003674(molecular_function);GO:0003676(nucleic acid binding);GO:0005575(cellular_component);GO:0045892(negative regulation of transcription, DNA-templated);GO:0045892(negative regulation of transcription, DNA-templated)	NA	NA	NA	RIKEN cDNA 2700081O15 gene [Source:MGI Symbol;Acc:MGI:1919667]	protein_coding;retained_intron;nonsense_mediated_decay	8.6176	6.2908	4.53978	8.50928	14.4801	17.2472	0.483346	-1.04887	0.000138201	0.0533553	down	yes
ENSMUSG00000076281	Gm24270	ENSMUST00000102326	NA	NA	NA	NA	predicted gene, 24270 [Source:MGI Symbol;Acc:MGI:5454047]	miRNA	19.2078	10.8904	6.71149	108.425	159.408	9.97026	0.132503	-2.91591	0.000146423	0.0552446	down	yes
ENSMUSG00000040703	Cyp2s1	ENSMUST00000043314;ENSMUST00000108395;ENSMUST00000152560;ENSMUST00000156714	GO:0004497(monooxygenase activity);GO:0004796(thromboxane-A synthase activity);GO:0005506(iron ion binding);GO:0005737(cytoplasm);GO:0005783(endoplasmic reticulum);GO:0005789(endoplasmic reticulum membrane);GO:0006082(organic acid metabolic process);GO:0006629(lipid metabolic process);GO:0006631(fatty acid metabolic process);GO:0006690(icosanoid metabolic process);GO:0006693(prostaglandin metabol…	00830(Retinol metabolism);00980(Metabolism of xenobiotics by cytochrome P450);00980(Metabolism of xenobiotics by cytochrome P450)	K07420	EC:1.14.14.1	cytochrome P450, family 2, subfamily s, polypeptide 1 [Source:MGI Symbol;Acc:MGI:1921384]	protein_coding;retained_intron	11.1243	9.78755	9.71168	15.0981	15.5619	32.6516	0.483695	-1.04783	0.000150476	0.0554721	down	yes
ENSMUSG00000117748	Gm50241	ENSMUST00000176437;ENSMUST00000169312	GO:0005634(nucleus);GO:0005654(nucleoplasm);GO:0005654(nucleoplasm)	NA	NA	NA	predicted gene, 50241 [Source:MGI Symbol;Acc:MGI:6303050]	processed_transcript;protein_coding	0.296253	0.214912	0.444175	0.56946	0.292824	15.4243	0.0586581	-4.09153	0.000153709	0.0554721	down	yes
ENSMUSG00000062627	Mysm1	ENSMUST00000075872;ENSMUST00000124820;ENSMUST00000125427;ENSMUST00000155935;ENSMUST00000134730;ENSMUST00000136130;ENSMUST00000131575;ENSMUST00000132758;ENSMUST00000149954	GO:0003677(DNA binding);GO:0003713(transcription coactivator activity);GO:0004843(thiol-dependent ubiquitin-specific protease activity);GO:0005515(protein binding);GO:0005634(nucleus);GO:0005654(nucleoplasm);GO:0005886(plasma membrane);GO:0006325(chromatin organization);GO:0006338(chromatin remodeling);GO:0006508(proteolysis);GO:0008233(peptidase activity);GO:0008237(metallopeptidase activity);GO…	NA	K11865	NA	myb-like, SWIRM and MPN domains 1 [Source:MGI Symbol;Acc:MGI:2444584]	protein_coding;processed_transcript	0.5095	0.34834	0.34317	2.36984	2.80162	0.339738	0.217922	-2.19812	0.000160504	0.0566919	down	yes
ENSMUSG00000110648	Gm38574	ENSMUST00000211855	NA	NA	NA	NA	predicted gene, 38574 [Source:MGI Symbol;Acc:MGI:5621459]	processed_pseudogene	2.98448	0.339164	2.25814	0.216019	0.366071	0.149818	7.62634	2.93099	0.000166928	0.0567968	up	yes
ENSMUSG00000110234	Gm45799	ENSMUST00000142874;ENSMUST00000142363;ENSMUST00000106785;ENSMUST00000149819;ENSMUST00000106786;ENSMUST00000210893;ENSMUST00000210312;ENSMUST00000211054	GO:0005739(mitochondrion);GO:0005743(mitochondrial inner membrane);GO:0015031(protein transport);GO:0016020(membrane);GO:0042719(mitochondrial intermembrane space protein transporter complex);GO:0042721(TIM22 mitochondrial import inner membrane insertion complex);GO:0046872(metal ion binding);GO:0046872(metal ion binding)	NA	K17779	NA	predicted gene 45799 [Source:MGI Symbol;Acc:MGI:5804914]	nonsense_mediated_decay;protein_coding	0.945188	1.10431	0.737711	0.207142	0.140376	0.381106	3.82531	1.93558	0.000167643	0.0567968	up	yes
ENSMUSG00000020061	Mybpc1	ENSMUST00000121629;ENSMUST00000124144;ENSMUST00000119185;ENSMUST00000156573;ENSMUST00000238199;ENSMUST00000153964;ENSMUST00000148205	GO:0005200(structural constituent of cytoskeleton);GO:0005515(protein binding);GO:0005856(cytoskeleton);GO:0006936(muscle contraction);GO:0007010(cytoskeleton organization);GO:0007010(cytoskeleton organization)	NA	K12557	NA	myosin binding protein C, slow-type [Source:MGI Symbol;Acc:MGI:1336213]	protein_coding;retained_intron	0.638154	0.411761	0.492672	0.0839028	0.166232	0.0212561	5.684	2.50691	0.000188616	0.0621943	up	yes
ENSMUSG00000095562	Erdr1	ENSMUST00000238681;ENSMUST00000179760;ENSMUST00000238482;ENSMUST00000178789;ENSMUST00000180251	NA	NA	NA	NA	erythroid differentiation regulator 1 [Source:MGI Symbol;Acc:MGI:2384747]	lincRNA	16.1553	57.3269	45.2293	126.213	88.8611	85.71	0.394674	-1.34127	0.000191067	0.0621943	down	yes
ENSMUSG00000061723	Tnnt3	ENSMUST00000179658;ENSMUST00000128294;ENSMUST00000105946;ENSMUST00000125649;ENSMUST00000105942;ENSMUST00000105948;ENSMUST00000169299;ENSMUST00000180152;ENSMUST00000105943;ENSMUST00000105949;ENSMUST00000105941;ENSMUST00000105952;ENSMUST00000105957;ENSMUST00000209807;ENSMUST00000105950;ENSMUST00000074187;ENSMUST00000146804;ENSMUST00000105954;ENSMUST00000105947;ENSMUST00000144259;ENSMUST00000078497;…	GO:0003009(skeletal muscle contraction);GO:0003779(actin binding);GO:0005523(tropomyosin binding);GO:0005861(troponin complex);GO:0006937(regulation of muscle contraction);GO:0006942(regulation of striated muscle contraction);GO:0030172(troponin C binding);GO:0031013(troponin I binding);GO:0043462(regulation of ATPase activity);GO:0048306(calcium-dependent protein binding);GO:1903612(positive reg…	NA	K12046	NA	troponin T3, skeletal, fast [Source:MGI Symbol;Acc:MGI:109550]	protein_coding;processed_transcript;retained_intron	2.26002	0.306427	2.20754	0.131228	0.239898	0.356915	6.55731	2.7131	0.0001961	0.0626048	up	yes
ENSMUSG00000064337	mt-Rnr1	ENSMUST00000082388	NA	NA	NA	NA	mitochondrially encoded 12S rRNA [Source:MGI Symbol;Acc:MGI:102493]	Mt_rRNA	283.599	238.635	192.88	689.715	930.82	236.088	0.385169	-1.37644	0.000226972	0.0710937	down	yes
ENSMUSG00000027852	Nras	ENSMUST00000029445;ENSMUST00000200069;ENSMUST00000197678;ENSMUST00000199367;ENSMUST00000199776;ENSMUST00000196355;ENSMUST00000200457;ENSMUST00000128264;ENSMUST00000199049	GO:0000166(nucleotide binding);GO:0001938(positive regulation of endothelial cell proliferation);GO:0003924(GTPase activity);GO:0005525(GTP binding);GO:0005794(Golgi apparatus);GO:0007165(signal transduction);GO:0007265(Ras protein signal transduction);GO:0016020(membrane);GO:0044877(protein-containing complex binding);GO:0044877(protein-containing complex binding)	01521(EGFR tyrosine kinase inhibitor resistance);01522(Endocrine resistance);04010(MAPK signaling pathway);04012(ErbB signaling pathway);04014(Ras signaling pathway);04015(Rap1 signaling pathway);04062(Chemokine signaling pathway);04068(FoxO signaling pathway);04071(Sphingolipid signaling pathway);04072(Phospholipase D signaling pathway);04137(Mitophagy - animal);04140(Autophagy - animal);04150(m…	K07828	NA	neuroblastoma ras oncogene [Source:MGI Symbol;Acc:MGI:97376]	protein_coding;retained_intron;nonsense_mediated_decay	12.8977	2.74186	13.8477	3.119	2.76742	3.42905	3.1654	1.66239	0.000250226	0.0769261	up	yes
ENSMUSG00000096768	Gm47283	ENSMUST00000238471;ENSMUST00000238758;ENSMUST00000179483;ENSMUST00000179077;ENSMUST00000177591;ENSMUST00000238238;ENSMUST00000177671	NA	NA	NA	NA	predicted gene, 47283 [Source:MGI Symbol;Acc:MGI:6096131]	lincRNA	4.44996	14.7255	11.224	25.1981	16.9694	28.7245	0.428813	-1.22158	0.000392242	0.116764	down	yes
ENSMUSG00000100261	Gm6473	ENSMUST00000188572	NA	NA	NA	NA	predicted gene 6473 [Source:MGI Symbol;Acc:MGI:3645176]	unprocessed_pseudogene	2.59582	0.281721	0.860796	0.175126	0.154355	0.260005	6.34169	2.66487	0.00039388	0.116764	up	yes
ENSMUSG00000020889	Nr1d1	ENSMUST00000064941;ENSMUST00000139220	GO:0000122(negative regulation of transcription by RNA polymerase II);GO:0000790(nuclear chromatin);GO:0000976(transcription regulatory region sequence-specific DNA binding);GO:0000977(RNA polymerase II regulatory region sequence-specific DNA binding);GO:0000978(RNA polymerase II cis-regulatory region sequence-specific DNA binding);GO:0001222(transcription corepressor binding);GO:0001227(DNA-bind…	04710(Circadian rhythm);04710(Circadian rhythm)	K03728	NA	nuclear receptor subfamily 1, group D, member 1 [Source:MGI Symbol;Acc:MGI:2444210]	protein_coding;processed_transcript	16.1544	42.9838	26.672	15.0932	13.2992	11.8169	2.13409	1.09362	0.000458205	0.13345	up	yes
ENSMUSG00000056412	Psenen-ps	ENSMUST00000121600	NA	NA	NA	NA	presenilin enhancer gamma secretase subunit, pseudogene [Source:MGI Symbol;Acc:MGI:3649201]	processed_pseudogene	2.4549	1.74949	3.19971	8.95882	8.86242	6.71534	0.301758	-1.72854	0.000495536	0.141834	down	yes
ENSMUSG00000053825	Ppfia2	ENSMUST00000217854;ENSMUST00000219024;ENSMUST00000029404;ENSMUST00000169303	GO:0005515(protein binding);GO:0030424(axon);GO:0043197(dendritic spine);GO:0045202(synapse);GO:0060998(regulation of dendritic spine development);GO:0061001(regulation of dendritic spine morphogenesis);GO:0098978(glutamatergic synapse);GO:0099172(presynapse organization);GO:0099181(structural constituent of presynapse);GO:0099519(dense core granule cytoskeletal transport);GO:2000300(regulation o…	NA	NA	NA	protein tyrosine phosphatase, receptor type, f polypeptide (PTPRF), interacting protein (liprin), alpha 2 [Source:MGI Symbol;Acc:MGI:2443834]	protein_coding;processed_transcript	0.0215602	0.229667	0.192282	0.00410553	0.0342891	0.0170603	7.99765	2.99958	0.000553055	0.152244	up	yes
ENSMUSG00000064339	mt-Rnr2	ENSMUST00000082390	NA	NA	NA	NA	mitochondrially encoded 16S rRNA [Source:MGI Symbol;Acc:MGI:102492]	Mt_rRNA	298.331	163.061	172.955	728.46	1018.21	168.285	0.33126	-1.59396	0.000559416	0.152244	down	yes
ENSMUSG00000076609	Igkc	ENSMUST00000103410	NA	NA	NA	NA	immunoglobulin kappa constant [Source:MGI Symbol;Acc:MGI:96495]	IG_C_gene	25.1883	38.2722	25.3463	6.21368	12.1964	15.761	2.59889	1.3779	0.000592197	0.158565	up	yes
ENSMUSG00000115756	Gm49519	ENSMUST00000227235;ENSMUST00000226673;ENSMUST00000227732;ENSMUST00000227146	NA	NA	NA	NA	predicted gene, 49519 [Source:MGI Symbol;Acc:MGI:6155213]	processed_transcript	0.0230605	0.083123	0.11321	0.306561	0.397651	0.232115	0.234313	-2.09349	0.000730522	0.192498	down	yes
ENSMUSG00000095079	Igha	ENSMUST00000178282;ENSMUST00000194738	GO:0002385(mucosal immune response);GO:0002455(humoral immune response mediated by circulating immunoglobulin);GO:0003823(antigen binding);GO:0006910(phagocytosis, recognition);GO:0006911(phagocytosis, engulfment);GO:0006958(complement activation, classical pathway);GO:0009897(external side of plasma membrane);GO:0016064(immunoglobulin mediated immune response);GO:0034987(immunoglobulin receptor …	NA	NA	NA	immunoglobulin heavy constant alpha [Source:MGI Symbol;Acc:MGI:96444]	IG_C_gene	6.14566	8.20997	7.37325	1.8415	2.62925	4.55438	2.4076	1.2676	0.000761615	0.197556	up	yes
ENSMUSG00000052305	Hbb-bs	ENSMUST00000023934;ENSMUST00000153218;ENSMUST00000131960	GO:0004601(peroxidase activity);GO:0005344(oxygen carrier activity);GO:0005615(extracellular space);GO:0005833(hemoglobin complex);GO:0015671(oxygen transport);GO:0019825(oxygen binding);GO:0020037(heme binding);GO:0030492(hemoglobin binding);GO:0031720(haptoglobin binding);GO:0031721(hemoglobin alpha binding);GO:0031722(hemoglobin beta binding);GO:0031838(haptoglobin-hemoglobin complex);GO:00427…	05143(African trypanosomiasis);05144(Malaria);05144(Malaria)	K13823	NA	hemoglobin, beta adult s chain [Source:MGI Symbol;Acc:MGI:5474852]	protein_coding;retained_intron	35.0617	30.8925	27.6987	47.4195	39.1556	145.488	0.403567	-1.30912	0.000814972	0.198961	down	yes
ENSMUSG00000113670	Gm49686	ENSMUST00000222206	NA	NA	NA	NA	predicted gene, 49686 [Source:MGI Symbol;Acc:MGI:6215136]	transcribed_unprocessed_pseudogene	0.107719	0.38775	0.070221	0.650622	0.619379	1.5705	0.199151	-2.32806	0.000873068	0.2024	down	yes
ENSMUSG00000065037	Rn7sk	ENSMUST00000083103	NA	NA	NA	NA	RNA, 7SK, nuclear [Source:MGI Symbol;Acc:MGI:103186]	misc_RNA	18.4206	22.1037	12.6456	49.3369	107.619	16.9925	0.305665	-1.70998	0.000875471	0.2024	down	yes
ENSMUSG00000026276	Septin2	ENSMUST00000027495;ENSMUST00000152778;ENSMUST00000152476;ENSMUST00000153826;ENSMUST00000157021;ENSMUST00000149532;ENSMUST00000150931;ENSMUST00000142401;ENSMUST00000136182;ENSMUST00000129211;ENSMUST00000131175;ENSMUST00000112912;ENSMUST00000188923	GO:0000145(exocyst);GO:0000166(nucleotide binding);GO:0000775(chromosome, centromeric region);GO:0000776(kinetochore);GO:0000777(condensed chromosome kinetochore);GO:0002036(regulation of L-glutamate import across plasma membrane);GO:0003924(GTPase activity);GO:0005515(protein binding);GO:0005525(GTP binding);GO:0005634(nucleus);GO:0005654(nucleoplasm);GO:0005694(chromosome);GO:0005737(cytoplasm)…	NA	NA	NA	septin 2 [Source:MGI Symbol;Acc:MGI:97298]	protein_coding;retained_intron	0.930569	13.0799	1.14598	0.586002	1.00911	1.05339	5.72266	2.51669	0.000904055	0.202814	up	yes
ENSMUSG00000090145	Ugt1a6b	ENSMUST00000113138;ENSMUST00000113137	GO:0005783(endoplasmic reticulum);GO:0008194(UDP-glycosyltransferase activity);GO:0015020(glucuronosyltransferase activity);GO:0016020(membrane);GO:0016021(integral component of membrane);GO:0016740(transferase activity);GO:0016757(transferase activity, transferring glycosyl groups);GO:0016758(transferase activity, transferring hexosyl groups);GO:0019899(enzyme binding);GO:0032991(protein-contain…	00040(Pentose and glucuronate interconversions);00053(Ascorbate and aldarate metabolism);00140(Steroid hormone biosynthesis);00830(Retinol metabolism);00860(Porphyrin and chlorophyll metabolism);00980(Metabolism of xenobiotics by cytochrome P450);00982(Drug metabolism - cytochrome P450);00983(Drug metabolism - other enzymes);05204(Chemical carcinogenesis);05204(Chemical carcinogenesis)	K00699	EC:2.4.1.17	UDP glucuronosyltransferase 1 family, polypeptide A6B [Source:MGI Symbol;Acc:MGI:3580629]	protein_coding	0.0063057	0.400726	0.133115	3.17288	0.941779	0.462265	0.118015	-3.08296	0.000947734	0.209778	down	yes
ENSMUSG00000024581	Napg	ENSMUST00000150267;ENSMUST00000025474;ENSMUST00000236925;ENSMUST00000237864;ENSMUST00000154563;ENSMUST00000236087;ENSMUST00000236193;ENSMUST00000133593;ENSMUST00000137849;ENSMUST00000236914;ENSMUST00000124837;ENSMUST00000235372;ENSMUST00000155440;ENSMUST00000237483;ENSMUST00000126870;ENSMUST00000237157;ENSMUST00000235974	GO:0005483(soluble NSF attachment protein activity);GO:0005515(protein binding);GO:0005739(mitochondrion);GO:0005774(vacuolar membrane);GO:0006886(intracellular protein transport);GO:0015031(protein transport);GO:0016020(membrane);GO:0016192(vesicle-mediated transport);GO:0019905(syntaxin binding);GO:0031201(SNARE complex);GO:0043209(myelin sheath);GO:0043209(myelin sheath)	NA	K21198	NA	N-ethylmaleimide sensitive fusion protein attachment protein gamma [Source:MGI Symbol;Acc:MGI:104561]	protein_coding;nonsense_mediated_decay;processed_transcript;retained_intron	4.15803	4.19164	2.87917	1.81054	2.32497	1.2316	2.09215	1.06499	0.00102158	0.220251	up	yes
ENSMUSG00000085521	4930526A20Rik	ENSMUST00000134228;ENSMUST00000142461	NA	NA	NA	NA	RIKEN cDNA 4930526A20 gene [Source:MGI Symbol;Acc:MGI:3612449]	transcribed_processed_pseudogene;processed_transcript	0.292917	0.555931	0.238499	1.49295	0.775425	1.48745	0.28951	-1.78832	0.00104855	0.222881	down	yes
ENSMUSG00000021214	Akr1c18	ENSMUST00000021635;ENSMUST00000110704	GO:0001758(retinal dehydrogenase activity);GO:0004032(alditol:NADP+ 1-oxidoreductase activity);GO:0004033(aldo-keto reductase (NADP) activity);GO:0004745(retinol dehydrogenase activity);GO:0005496(steroid binding);GO:0005634(nucleus);GO:0005737(cytoplasm);GO:0005829(cytosol);GO:0006693(prostaglandin metabolic process);GO:0006709(progesterone catabolic process);GO:0007186(G protein-coupled recepto…	00140(Steroid hormone biosynthesis);00140(Steroid hormone biosynthesis)	K05295	EC:1.1.1.149	aldo-keto reductase family 1, member C18 [Source:MGI Symbol;Acc:MGI:2145420]	protein_coding	1.89193	156.757	22.5321	7.18539	9.48458	6.12588	7.94799	2.99059	0.00107279	0.222881	up	yes
ENSMUSG00000017300	Tnnc2	ENSMUST00000103095;ENSMUST00000155443	GO:0003009(skeletal muscle contraction);GO:0003779(actin binding);GO:0005509(calcium ion binding);GO:0005861(troponin complex);GO:0006937(regulation of muscle contraction);GO:0046872(metal ion binding);GO:0048306(calcium-dependent protein binding);GO:0051015(actin filament binding);GO:0051015(actin filament binding)	04020(Calcium signaling pathway);04020(Calcium signaling pathway)	NA	NA	troponin C2, fast [Source:MGI Symbol;Acc:MGI:98780]	protein_coding;processed_transcript	2.63023	0.0001	2.72219	0.0001	0.0001	0.169127	31.6106	4.98234	0.00107406	0.222881	up	yes
ENSMUSG00000029638	Glcci1	ENSMUST00000064285;ENSMUST00000161494;ENSMUST00000162383;ENSMUST00000162567;ENSMUST00000162206;ENSMUST00000161217	GO:0005515(protein binding);GO:0005737(cytoplasm);GO:0005737(cytoplasm)	NA	NA	NA	glucocorticoid induced transcript 1 [Source:MGI Symbol;Acc:MGI:2179717]	protein_coding;processed_transcript	0.693612	0.365763	0.489862	1.32092	0.684533	2.44255	0.3483	-1.5216	0.00121517	0.236005	down	yes
ENSMUSG00000037475	Thoc2	ENSMUST00000047037;ENSMUST00000124458;ENSMUST00000151802;ENSMUST00000151430;ENSMUST00000150443;ENSMUST00000131259;ENSMUST00000151454;ENSMUST00000129915;ENSMUST00000145586;ENSMUST00000130993;ENSMUST00000134084;ENSMUST00000123512;ENSMUST00000143557;ENSMUST00000155369;ENSMUST00000127338;ENSMUST00000152921	GO:0000346(transcription export complex);GO:0000347(THO complex);GO:0000445(THO complex part of transcription export complex);GO:0000784(nuclear chromosome, telomeric region);GO:0000902(cell morphogenesis);GO:0001824(blastocyst development);GO:0003723(RNA binding);GO:0003729(mRNA binding);GO:0005515(protein binding);GO:0005634(nucleus);GO:0006397(mRNA processing);GO:0006406(mRNA export from nucle…	03013(RNA transport);03040(Spliceosome);03040(Spliceosome)	K12879	NA	THO complex 2 [Source:MGI Symbol;Acc:MGI:2442413]	protein_coding;retained_intron;nonsense_mediated_decay;processed_transcript	4.7422	4.47598	4.29049	3.37399	1.20958	1.28369	2.30238	1.20313	0.0012202	0.236005	up	yes
ENSMUSG00000106826	Gm42583	ENSMUST00000202678	NA	NA	NA	NA	predicted gene 42583 [Source:MGI Symbol;Acc:MGI:5662720]	TEC	0.0001	0.008676	0.033136	0.160718	0.237649	0.021543	0.0998119	-3.32464	0.00122197	0.236005	down	yes
ENSMUSG00000019987	Arg1	ENSMUST00000020161;ENSMUST00000218260;ENSMUST00000220186	GO:0000050(urea cycle);GO:0001889(liver development);GO:0001938(positive regulation of endothelial cell proliferation);GO:0002250(adaptive immune response);GO:0002376(immune system process);GO:0004053(arginase activity);GO:0005615(extracellular space);GO:0005737(cytoplasm);GO:0005741(mitochondrial outer membrane);GO:0005829(cytosol);GO:0006525(arginine metabolic process);GO:0007565(female pregnan…	00220(Arginine biosynthesis);00330(Arginine and proline metabolism);05146(Amoebiasis);05146(Amoebiasis)	K01476	EC:3.5.3.1	arginase, liver [Source:MGI Symbol;Acc:MGI:88070]	protein_coding;retained_intron	0.358172	0.563183	0.22769	0.693261	5.36103	0.501327	0.175276	-2.5123	0.0012226	0.236005	down	yes
ENSMUSG00000030399	Ckm	ENSMUST00000208710;ENSMUST00000003643;ENSMUST00000208079	GO:0000166(nucleotide binding);GO:0003824(catalytic activity);GO:0004111(creatine kinase activity);GO:0005524(ATP binding);GO:0005615(extracellular space);GO:0005737(cytoplasm);GO:0006603(phosphocreatine metabolic process);GO:0009408(response to heat);GO:0016301(kinase activity);GO:0016310(phosphorylation);GO:0016740(transferase activity);GO:0016772(transferase activity, transferring phosphorus-c…	00330(Arginine and proline metabolism);00330(Arginine and proline metabolism)	K00933	EC:2.7.3.2	creatine kinase, muscle [Source:MGI Symbol;Acc:MGI:88413]	protein_coding;processed_transcript	0.759582	0.0001	1.14181	0.0303503	0.0550781	0.0562425	13.4219	3.74652	0.00125523	0.239518	up	yes
ENSMUSG00000043168	4930426D05Rik	ENSMUST00000143378;ENSMUST00000139804;ENSMUST00000144487;ENSMUST00000132729	NA	NA	NA	NA	RIKEN cDNA 4930426D05 gene [Source:MGI Symbol;Acc:MGI:1921894]	antisense	11.5948	6.09189	3.43985	2.66236	2.7945	2.9002	2.52799	1.33799	0.00129524	0.241839	up	yes
ENSMUSG00000052684	Jun	ENSMUST00000107094	GO:0000122(negative regulation of transcription by RNA polymerase II);GO:0000790(nuclear chromatin);GO:0000976(transcription regulatory region sequence-specific DNA binding);GO:0000978(RNA polymerase II cis-regulatory region sequence-specific DNA binding);GO:0000981(DNA-binding transcription factor activity, RNA polymerase II-specific);GO:0001102(RNA polymerase II activating transcription factor …	01522(Endocrine resistance);04010(MAPK signaling pathway);04012(ErbB signaling pathway);04024(cAMP signaling pathway);04137(Mitophagy - animal);04210(Apoptosis);04310(Wnt signaling pathway);04380(Osteoclast differentiation);04510(Focal adhesion);04530(Tight junction);04620(Toll-like receptor signaling pathway);04621(NOD-like receptor signaling pathway);04625(C-type lectin receptor signaling pathw…	K04448	NA	jun proto-oncogene [Source:MGI Symbol;Acc:MGI:96646]	protein_coding	86.1181	29.3248	75.0397	31.335	31.5787	26.9774	2.11904	1.08341	0.00129653	0.241839	up	yes
ENSMUSG00000030759	Far1	ENSMUST00000033018;ENSMUST00000067929;ENSMUST00000155183;ENSMUST00000123591;ENSMUST00000151133;ENSMUST00000123845;ENSMUST00000122890;ENSMUST00000136158;ENSMUST00000164745;ENSMUST00000156554;ENSMUST00000129087	GO:0005777(peroxisome);GO:0005778(peroxisomal membrane);GO:0005779(integral component of peroxisomal membrane);GO:0006629(lipid metabolic process);GO:0008611(ether lipid biosynthetic process);GO:0010025(wax biosynthetic process);GO:0016020(membrane);GO:0016021(integral component of membrane);GO:0016491(oxidoreductase activity);GO:0035336(long-chain fatty-acyl-CoA metabolic process);GO:0043231(int…	04146(Peroxisome);04146(Peroxisome)	K13356	EC:1.2.1.84	fatty acyl CoA reductase 1 [Source:MGI Symbol;Acc:MGI:1914670]	protein_coding;retained_intron	5.08196	2.09158	3.3792	1.96968	1.39646	1.2884	2.26719	1.18091	0.00140737	0.259598	up	yes
ENSMUSG00000069917	Hba-a2	ENSMUST00000093207;ENSMUST00000147010	GO:0001701(in utero embryonic development);GO:0004601(peroxidase activity);GO:0005344(oxygen carrier activity);GO:0005506(iron ion binding);GO:0005615(extracellular space);GO:0005833(hemoglobin complex);GO:0009617(response to bacterium);GO:0015671(oxygen transport);GO:0019825(oxygen binding);GO:0020037(heme binding);GO:0022627(cytosolic small ribosomal subunit);GO:0031720(haptoglobin binding);GO:…	05143(African trypanosomiasis);05144(Malaria);05144(Malaria)	K13822	NA	hemoglobin alpha, adult chain 2 [Source:MGI Symbol;Acc:MGI:96016]	protein_coding;retained_intron	24.0092	25.9039	23.1048	34.8861	29.7549	127.759	0.379511	-1.39779	0.00146494	0.264371	down	yes
ENSMUSG00000071748	Gm14698	ENSMUST00000096420	GO:0001691(pseudophosphatase activity);GO:0005515(protein binding);GO:0005634(nucleus);GO:0005654(nucleoplasm);GO:0005737(cytoplasm);GO:0005829(cytosol);GO:0006470(protein dephosphorylation);GO:0007283(spermatogenesis);GO:0008138(protein tyrosine/serine/threonine phosphatase activity);GO:0016311(dephosphorylation);GO:0016791(phosphatase activity);GO:0032091(negative regulation of protein binding)…	NA	NA	NA	predicted gene 14698 [Source:MGI Symbol;Acc:MGI:3709613]	protein_coding	0.356753	1.07977	1.72205	0.301018	0.262969	0.343321	3.48126	1.79961	0.0014651	0.264371	up	yes
ENSMUSG00000037944	Ccr7	ENSMUST00000103134	GO:0001768(establishment of T cell polarity);GO:0002408(myeloid dendritic cell chemotaxis);GO:0002518(lymphocyte chemotaxis across high endothelial venule);GO:0002606(positive regulation of dendritic cell antigen processing and presentation);GO:0002649(regulation of tolerance induction to self antigen);GO:0002885(positive regulation of hypersensitivity);GO:0002922(positive regulation of humoral i…	04060(Cytokine-cytokine receptor interaction);04062(Chemokine signaling pathway)	K04182	NA	chemokine (C-C motif) receptor 7 [Source:MGI Symbol;Acc:MGI:103011]	protein_coding	0.182059	0.742556	0.510223	0.113148	0.101248	0.134709	4.11005	2.03915	0.00148895	0.265785	up	yes
ENSMUSG00000013878	Rnf170	ENSMUST00000014022;ENSMUST00000209707;ENSMUST00000153528;ENSMUST00000124757;ENSMUST00000209300;ENSMUST00000124867;ENSMUST00000110573;ENSMUST00000140819;ENSMUST00000110575;ENSMUST00000110579	GO:0003674(molecular_function);GO:0005575(cellular_component);GO:0005783(endoplasmic reticulum);GO:0005789(endoplasmic reticulum membrane);GO:0008150(biological_process);GO:0016020(membrane);GO:0016021(integral component of membrane);GO:0016567(protein ubiquitination);GO:0016740(transferase activity);GO:0046872(metal ion binding);GO:0061630(ubiquitin protein ligase activity);GO:0061630(ubiquitin …	NA	K15707	EC:2.3.2.27	ring finger protein 170 [Source:MGI Symbol;Acc:MGI:1924983]	protein_coding;nonsense_mediated_decay;retained_intron	4.01309	0.436722	3.94355	0.522146	0.65306	1.02367	3.81712	1.93248	0.00169107	0.290924	up	yes
ENSMUSG00000028600	Podn	ENSMUST00000145491;ENSMUST00000106708;ENSMUST00000106709;ENSMUST00000124265;ENSMUST00000146851;ENSMUST00000130026;ENSMUST00000147597;ENSMUST00000044248	GO:0005515(protein binding);GO:0005518(collagen binding);GO:0005576(extracellular region);GO:0005615(extracellular space);GO:0005737(cytoplasm);GO:0008285(negative regulation of cell population proliferation);GO:0030336(negative regulation of cell migration);GO:0030336(negative regulation of cell migration)	NA	NA	NA	podocan [Source:MGI Symbol;Acc:MGI:2674939]	processed_transcript;protein_coding	0.274989	1.11848	0.0990702	0.0776166	0.125535	0.0768346	5.33075	2.41434	0.00169988	0.290924	up	yes
ENSMUSG00000050947	Amigo1	ENSMUST00000106656;ENSMUST00000050909;ENSMUST00000106659;ENSMUST00000155782;ENSMUST00000106661	GO:0005515(protein binding);GO:0005886(plasma membrane);GO:0005887(integral component of plasma membrane);GO:0007155(cell adhesion);GO:0007156(homophilic cell adhesion via plasma membrane adhesion molecules);GO:0007157(heterophilic cell-cell adhesion via plasma membrane cell adhesion molecules);GO:0007275(multicellular organism development);GO:0007399(nervous system development);GO:0007409(axonog…	NA	K22529	NA	adhesion molecule with Ig like domain 1 [Source:MGI Symbol;Acc:MGI:2653612]	protein_coding	3.56409	1.44727	1.79259	5.40905	4.11252	4.95012	0.470155	-1.08879	0.00177978	0.301491	down	yes
ENSMUSG00000088088	Rmrp	ENSMUST00000157463	NA	NA	NA	NA	RNA component of mitochondrial RNAase P [Source:MGI Symbol;Acc:MGI:97937]	ribozyme	2.59201	0.858028	1.00866	9.84233	17.0343	0.798912	0.161106	-2.63392	0.0018334	0.307436	down	yes
ENSMUSG00000062101	Zfp119b	ENSMUST00000056147;ENSMUST00000189452	GO:0003674(molecular_function);GO:0003676(nucleic acid binding);GO:0005634(nucleus);GO:0006355(regulation of transcription, DNA-templated);GO:0046872(metal ion binding);GO:0046872(metal ion binding)	05168(Herpes simplex virus 1 infection);05168(Herpes simplex virus 1 infection)	K09228	NA	zinc finger protein 119b [Source:MGI Symbol;Acc:MGI:2385323]	protein_coding	1.41538	1.05135	0.992346	0.470103	0.29022	0.428339	2.91006	1.54105	0.00211381	0.346892	up	yes
ENSMUSG00000027398	Il1b	ENSMUST00000028881;ENSMUST00000141979;ENSMUST00000155994	GO:0000122(negative regulation of transcription by RNA polymerase II);GO:0000165(MAPK cascade);GO:0000187(activation of MAPK activity);GO:0001660(fever generation);GO:0001934(positive regulation of protein phosphorylation);GO:0005125(cytokine activity);GO:0005149(interleukin-1 receptor binding);GO:0005178(integrin binding);GO:0005576(extracellular region);GO:0005615(extracellular space);GO:000573…	01523(Antifolate resistance);04010(MAPK signaling pathway);04060(Cytokine-cytokine receptor interaction);04064(NF-kappa B signaling pathway);04217(Necroptosis);04380(Osteoclast differentiation);04620(Toll-like receptor signaling pathway);04621(NOD-like receptor signaling pathway);04623(Cytosolic DNA-sensing pathway);04625(C-type lectin receptor signaling pathway);04640(Hematopoietic cell lineage)…	K04519	NA	interleukin 1 beta [Source:MGI Symbol;Acc:MGI:96543]	protein_coding;processed_transcript;retained_intron	0.204144	0.176067	0.306824	1.11292	0.73573	0.462403	0.297282	-1.7501	0.00213138	0.346892	down	yes
ENSMUSG00000096722	Hmgb1-ps9	ENSMUST00000179479	NA	NA	NA	NA	high mobility group box 1, pseudogene 9 [Source:MGI Symbol;Acc:MGI:96115]	processed_pseudogene	3.37371	7.6582	2.00024	1.18354	0.953111	1.59563	3.49174	1.80395	0.00216553	0.349028	up	yes
ENSMUSG00000033863	Klf9	ENSMUST00000036884;ENSMUST00000236357	GO:0003676(nucleic acid binding);GO:0005634(nucleus);GO:0005654(nucleoplasm);GO:0005829(cytosol);GO:0005886(plasma membrane);GO:0007623(circadian rhythm);GO:0010839(negative regulation of keratinocyte proliferation);GO:0071387(cellular response to cortisol stimulus);GO:0097067(cellular response to thyroid hormone stimulus);GO:0097067(cellular response to thyroid hormone stimulus)	NA	K09208	NA	Kruppel-like factor 9 [Source:MGI Symbol;Acc:MGI:1333856]	protein_coding;processed_transcript	17.5056	9.63942	11.3337	7.32847	2.81546	7.82322	2.14161	1.0987	0.00225329	0.359682	up	yes
ENSMUSG00000072966	Gprasp2	ENSMUST00000173804;ENSMUST00000134986;ENSMUST00000137392;ENSMUST00000138251;ENSMUST00000141953;ENSMUST00000142034;ENSMUST00000132798;ENSMUST00000150797;ENSMUST00000130034;ENSMUST00000113136;ENSMUST00000148658	GO:0001540(amyloid-beta binding);GO:0001664(G protein-coupled receptor binding);GO:0005634(nucleus);GO:0005737(cytoplasm);GO:0008150(biological_process);GO:0008150(biological_process)	NA	NA	NA	G protein-coupled receptor associated sorting protein 2 [Source:MGI Symbol;Acc:MGI:2442071]	protein_coding;processed_transcript;retained_intron	10.8213	1.97204	0.727249	0.67843	1.0805	1.27741	4.45293	2.15475	0.00238813	0.377575	up	yes
ENSMUSG00000105906	Iglc1	ENSMUST00000200568	GO:0003823(antigen binding);GO:0005515(protein binding);GO:0006910(phagocytosis, recognition);GO:0006911(phagocytosis, engulfment);GO:0006958(complement activation, classical pathway);GO:0009897(external side of plasma membrane);GO:0019815(B cell receptor complex);GO:0034987(immunoglobulin receptor binding);GO:0042571(immunoglobulin complex, circulating);GO:0042742(defense response to bacterium);…	NA	NA	NA	immunoglobulin lambda constant 1 [Source:MGI Symbol;Acc:MGI:99546]	IG_C_gene	2.49525	4.35783	1.56031	0.098593	0.235457	1.24415	5.33099	2.4144	0.00241825	0.37873	up	yes
ENSMUSG00000090264	Eif4ebp3	ENSMUST00000036765	GO:0005737(cytoplasm);GO:0006417(regulation of translation);GO:0008190(eukaryotic initiation factor 4E binding);GO:0017148(negative regulation of translation);GO:0045947(negative regulation of translational initiation)	03013(RNA transport)	K18645	NA	eukaryotic translation initiation factor 4E binding protein 3 [Source:MGI Symbol;Acc:MGI:1270847]	protein_coding	2.18335	2.09984	0.375702	0.281197	0.390479	0.407001	4.31908	2.11072	0.00247576	0.380557	up	yes
ENSMUSG00000083424	Rpl35a-ps4	ENSMUST00000121779	NA	NA	NA	NA	ribosomal protein 35A, pseudogene 4 [Source:MGI Symbol;Acc:MGI:3650995]	processed_pseudogene	6.18227	5.06983	7.07139	8.61058	33.9864	12.2108	0.334323	-1.58069	0.00265099	0.400883	down	yes
ENSMUSG00000048833	Slc39a9	ENSMUST00000085245;ENSMUST00000217889;ENSMUST00000219405;ENSMUST00000219706;ENSMUST00000218440;ENSMUST00000219689;ENSMUST00000217805;ENSMUST00000217679	GO:0003674(molecular_function);GO:0005575(cellular_component);GO:0006811(ion transport);GO:0006829(zinc ion transport);GO:0008150(biological_process);GO:0016020(membrane);GO:0016021(integral component of membrane);GO:0030001(metal ion transport);GO:0046873(metal ion transmembrane transporter activity);GO:0055085(transmembrane transport);GO:0055085(transmembrane transport)	NA	K14715	NA	solute carrier family 39 (zinc transporter), member 9 [Source:MGI Symbol;Acc:MGI:1914820]	protein_coding;processed_transcript;retained_intron	1.48581	1.16852	1.46924	1.76073	8.20636	1.62005	0.355874	-1.49056	0.00271942	0.403545	down	yes
ENSMUSG00000032717	Mdfi	ENSMUST00000035375;ENSMUST00000066368;ENSMUST00000132125;ENSMUST00000152455;ENSMUST00000140234;ENSMUST00000131971;ENSMUST00000129360;ENSMUST00000113280;ENSMUST00000125745	GO:0005515(protein binding);GO:0005634(nucleus);GO:0005737(cytoplasm);GO:0007275(multicellular organism development);GO:0008134(transcription factor binding);GO:0030154(cell differentiation);GO:0042802(identical protein binding);GO:0048704(embryonic skeletal system morphogenesis);GO:0060707(trophoblast giant cell differentiation);GO:0060707(trophoblast giant cell differentiation)	NA	NA	NA	MyoD family inhibitor [Source:MGI Symbol;Acc:MGI:107687]	protein_coding;retained_intron;processed_transcript	7.09917	10.9306	9.63052	5.82404	4.57009	2.51605	2.14251	1.0993	0.00272255	0.403545	up	yes
ENSMUSG00000025766	D3Ertd751e	ENSMUST00000026868;ENSMUST00000193075;ENSMUST00000195577;ENSMUST00000146165;ENSMUST00000195030;ENSMUST00000192799;ENSMUST00000143841;ENSMUST00000026867;ENSMUST00000108065;ENSMUST00000120167;ENSMUST00000193228;ENSMUST00000119572;ENSMUST00000195882;ENSMUST00000194346;ENSMUST00000192193	GO:0003674(molecular_function);GO:0005575(cellular_component);GO:0008150(biological_process);GO:0008150(biological_process)	NA	NA	NA	DNA segment, Chr 3, ERATO Doi 751, expressed [Source:MGI Symbol;Acc:MGI:1289213]	protein_coding;retained_intron;nonsense_mediated_decay	1.47239	0.176446	0.123537	0.138026	0.108893	0.0822002	5.38519	2.429	0.00297882	0.430012	up	yes
ENSMUSG00000073940	Hbb-bt	ENSMUST00000098192	GO:0004601(peroxidase activity);GO:0005344(oxygen carrier activity);GO:0005615(extracellular space);GO:0005833(hemoglobin complex);GO:0015671(oxygen transport);GO:0019825(oxygen binding);GO:0020037(heme binding);GO:0030492(hemoglobin binding);GO:0031720(haptoglobin binding);GO:0031721(hemoglobin alpha binding);GO:0031722(hemoglobin beta binding);GO:0031838(haptoglobin-hemoglobin complex);GO:00427…	05143(African trypanosomiasis);05144(Malaria)	K13823	NA	hemoglobin, beta adult t chain [Source:MGI Symbol;Acc:MGI:5474850]	protein_coding	16.3641	13.1421	12.7201	23.0699	15.2842	69.377	0.39196	-1.35122	0.00300858	0.430565	down	yes
ENSMUSG00000047712	Ust	ENSMUST00000061601;ENSMUST00000219116	GO:0000139(Golgi membrane);GO:0005794(Golgi apparatus);GO:0008146(sulfotransferase activity);GO:0016020(membrane);GO:0016021(integral component of membrane);GO:0016740(transferase activity);GO:0030010(establishment of cell polarity);GO:0050770(regulation of axonogenesis);GO:0050770(regulation of axonogenesis)	00532(Glycosaminoglycan biosynthesis - chondroitin sulfate / dermatan sulfate);00532(Glycosaminoglycan biosynthesis - chondroitin sulfate / dermatan sulfate)	K03193	EC:2.8.2.-	uronyl-2-sulfotransferase [Source:MGI Symbol;Acc:MGI:2442406]	protein_coding;processed_transcript	1.50711	1.56092	2.94513	4.34262	3.79829	4.30569	0.483117	-1.04955	0.00330551	0.458638	down	yes
ENSMUSG00000033355	Rtp4	ENSMUST00000211349;ENSMUST00000038423;ENSMUST00000211569;ENSMUST00000210901;ENSMUST00000209422	GO:0001580(detection of chemical stimulus involved in sensory perception of bitter taste);GO:0005515(protein binding);GO:0005737(cytoplasm);GO:0006612(protein targeting to membrane);GO:0016020(membrane);GO:0016021(integral component of membrane);GO:0031849(olfactory receptor binding);GO:0051205(protein insertion into membrane);GO:0051607(defense response to virus);GO:0051607(defense response to v…	NA	NA	NA	receptor transporter protein 4 [Source:MGI Symbol;Acc:MGI:1915025]	protein_coding	4.23507	7.32168	5.53238	2.2317	2.59523	3.17386	2.13593	1.09486	0.00331525	0.458638	up	yes
ENSMUSG00000023484	Prph	ENSMUST00000229268;ENSMUST00000047104;ENSMUST00000024249;ENSMUST00000230021	GO:0005198(structural molecule activity);GO:0005515(protein binding);GO:0005882(intermediate filament);GO:0030424(axon);GO:0045098(type III intermediate filament);GO:0045104(intermediate filament cytoskeleton organization);GO:0045104(intermediate filament cytoskeleton organization)	05014(Amyotrophic lateral sclerosis (ALS));05014(Amyotrophic lateral sclerosis (ALS))	K07607	NA	peripherin [Source:MGI Symbol;Acc:MGI:97774]	protein_coding	0.639078	0.891083	0.446444	0.254165	0.210281	0.163212	3.14917	1.65497	0.00334633	0.458639	up	yes
ENSMUSG00000051817	Sox12	ENSMUST00000182625;ENSMUST00000063332	GO:0000976(transcription regulatory region sequence-specific DNA binding);GO:0000981(DNA-binding transcription factor activity, RNA polymerase II-specific);GO:0001228(DNA-binding transcription activator activity, RNA polymerase II-specific);GO:0003677(DNA binding);GO:0003713(transcription coactivator activity);GO:0005634(nucleus);GO:0005654(nucleoplasm);GO:0005667(transcription factor complex);GO…	NA	K09268	NA	SRY (sex determining region Y)-box 12 [Source:MGI Symbol;Acc:MGI:98360]	protein_coding	3.69353	2.41791	2.10792	1.96385	2.18527	38.13	0.194407	-2.36285	0.00337052	0.458639	down	yes
ENSMUSG00000062861	Zfp28	ENSMUST00000081022;ENSMUST00000208949;ENSMUST00000207809;ENSMUST00000207086;ENSMUST00000208338;ENSMUST00000207465	GO:0003676(nucleic acid binding);GO:0003677(DNA binding);GO:0005634(nucleus);GO:0006355(regulation of transcription, DNA-templated);GO:0046872(metal ion binding);GO:0046872(metal ion binding)	05168(Herpes simplex virus 1 infection);05168(Herpes simplex virus 1 infection)	K09228	NA	zinc finger protein 28 [Source:MGI Symbol;Acc:MGI:99175]	protein_coding;nonsense_mediated_decay	2.47147	1.0753	1.99883	0.921279	0.71144	0.647735	2.4318	1.28202	0.00343484	0.463592	up	yes
ENSMUSG00000022382	Wnt7b	ENSMUST00000167968;ENSMUST00000230299;ENSMUST00000023015;ENSMUST00000229191;ENSMUST00000109424;ENSMUST00000229495	GO:0001525(angiogenesis);GO:0001701(in utero embryonic development);GO:0001944(vasculature development);GO:0003338(metanephros morphogenesis);GO:0005102(signaling receptor binding);GO:0005109(frizzled binding);GO:0005125(cytokine activity);GO:0005576(extracellular region);GO:0005615(extracellular space);GO:0005737(cytoplasm);GO:0005788(endoplasmic reticulum lumen);GO:0005886(plasma membrane);GO:0…	04150(mTOR signaling pathway);04310(Wnt signaling pathway);04390(Hippo signaling pathway);04550(Signaling pathways regulating pluripotency of stem cells);04916(Melanogenesis);04934(Cushing syndrome);05165(Human papillomavirus infection);05200(Pathways in cancer);05205(Proteoglycans in cancer);05217(Basal cell carcinoma);05224(Breast cancer);05225(Hepatocellular carcinoma);05226(Gastric cancer);05…	NA	NA	wingless-type MMTV integration site family, member 7B [Source:MGI Symbol;Acc:MGI:98962]	protein_coding;processed_transcript	0.077814	7.4471	0.251188	0.0947898	0.476118	0.150965	10.7721	3.42923	0.00352272	0.471619	up	yes
ENSMUSG00000026031	Cflar	ENSMUST00000140940;ENSMUST00000114313;ENSMUST00000114309;ENSMUST00000069333;ENSMUST00000123553;ENSMUST00000149874;ENSMUST00000124567;ENSMUST00000123032;ENSMUST00000189858;ENSMUST00000164900;ENSMUST00000097723;ENSMUST00000097722;ENSMUST00000156870	GO:0001666(response to hypoxia);GO:0002020(protease binding);GO:0004197(cysteine-type endopeptidase activity);GO:0005123(death receptor binding);GO:0005515(protein binding);GO:0005737(cytoplasm);GO:0006508(proteolysis);GO:0006915(apoptotic process);GO:0006919(activation of cysteine-type endopeptidase activity involved in apoptotic process);GO:0007519(skeletal muscle tissue development);GO:0008047…	04064(NF-kappa B signaling pathway);04140(Autophagy - animal);04210(Apoptosis);04217(Necroptosis);04668(TNF signaling pathway);05142(Chagas disease (American trypanosomiasis));05160(Hepatitis C);05160(Hepatitis C)	K04724	NA	CASP8 and FADD-like apoptosis regulator [Source:MGI Symbol;Acc:MGI:1336166]	processed_transcript;protein_coding;retained_intron	7.07594	6.75729	5.94313	5.43798	1.80745	1.79758	2.18692	1.1289	0.00362627	0.477776	up	yes
ENSMUSG00000036422	Pcdh8	ENSMUST00000039568;ENSMUST00000195034;ENSMUST00000195355;ENSMUST00000194214	GO:0001756(somitogenesis);GO:0005509(calcium ion binding);GO:0005886(plasma membrane);GO:0005887(integral component of plasma membrane);GO:0007155(cell adhesion);GO:0007156(homophilic cell adhesion via plasma membrane adhesion molecules);GO:0007268(chemical synaptic transmission);GO:0016020(membrane);GO:0016021(integral component of membrane);GO:0016331(morphogenesis of embryonic epithelium);GO:0…	NA	K16499	NA	protocadherin 8 [Source:MGI Symbol;Acc:MGI:1306800]	protein_coding;retained_intron;processed_transcript	0.350683	0.444123	0.450863	0.927641	0.594312	1.76333	0.379167	-1.3991	0.00372219	0.48275	down	yes
ENSMUSG00000022229	Atp12a	ENSMUST00000007340;ENSMUST00000225698	GO:0000166(nucleotide binding);GO:0005391(sodium:potassium-exchanging ATPase activity);GO:0005515(protein binding);GO:0005524(ATP binding);GO:0005886(plasma membrane);GO:0006811(ion transport);GO:0006813(potassium ion transport);GO:0006883(cellular sodium ion homeostasis);GO:0006885(regulation of pH);GO:0008556(potassium transmembrane transporter activity, phosphorylative mechanism);GO:0008900(po…	00190(Oxidative phosphorylation);00190(Oxidative phosphorylation)	K01544	EC:7.2.2.19	ATPase, H+/K+ transporting, nongastric, alpha polypeptide [Source:MGI Symbol;Acc:MGI:1926943]	protein_coding;processed_transcript	0.0116553	0.2898	0.0943672	1.27017	2.50179	0.0237482	0.104281	-3.26145	0.00383318	0.486089	down	yes
ENSMUSG00000087231	E230016M11Rik	ENSMUST00000149889;ENSMUST00000204847;ENSMUST00000147548;ENSMUST00000130657	NA	NA	NA	NA	RIKEN cDNA E230016M11 gene [Source:MGI Symbol;Acc:MGI:2443524]	retained_intron;bidirectional_promoter_lncRNA	0.631916	1.00211	0.491777	0.260105	0.266037	0.244104	2.7599	1.46461	0.00383577	0.486089	up	yes
ENSMUSG00000105868	Gm43766	ENSMUST00000200590	NA	NA	NA	NA	predicted gene 43766 [Source:MGI Symbol;Acc:MGI:5663903]	TEC	0.623269	0.165193	0.403733	0.167054	0.099311	0.038141	3.91518	1.96908	0.00388059	0.488043	up	yes
ENSMUSG00000046959	Slc26a1	ENSMUST00000051757;ENSMUST00000119270;ENSMUST00000136227;ENSMUST00000163328	GO:0005886(plasma membrane);GO:0005887(integral component of plasma membrane);GO:0006811(ion transport);GO:0006821(chloride transport);GO:0008271(secondary active sulfate transmembrane transporter activity);GO:0008272(sulfate transport);GO:0015106(bicarbonate transmembrane transporter activity);GO:0015108(chloride transmembrane transporter activity);GO:0015116(sulfate transmembrane transporter ac…	NA	K14700	NA	solute carrier family 26 (sulfate transporter), member 1 [Source:MGI Symbol;Acc:MGI:2385894]	protein_coding	0.144413	0.0612358	0.0454532	0.287396	0.402831	0.168436	0.292434	-1.77382	0.00392004	0.489298	down	yes
ENSMUSG00000044244	Il20rb	ENSMUST00000136606;ENSMUST00000122880;ENSMUST00000136856;ENSMUST00000098458;ENSMUST00000125259;ENSMUST00000152756	GO:0001808(negative regulation of type IV hypersensitivity);GO:0002437(inflammatory response to antigenic stimulus);GO:0002765(immune response-inhibiting signal transduction);GO:0004896(cytokine receptor activity);GO:0005515(protein binding);GO:0005886(plasma membrane);GO:0016020(membrane);GO:0016021(integral component of membrane);GO:0019221(cytokine-mediated signaling pathway);GO:0032689(negati…	04060(Cytokine-cytokine receptor interaction);04630(Jak-STAT signaling pathway);04630(Jak-STAT signaling pathway)	K05137	NA	interleukin 20 receptor beta [Source:MGI Symbol;Acc:MGI:2143266]	retained_intron;processed_transcript;protein_coding	1.02294	0.520584	1.14292	0.422858	0.314512	0.257193	2.70113	1.43357	0.00421789	0.518675	up	yes
ENSMUSG00000069919	Hba-a1	ENSMUST00000093209;ENSMUST00000142555	GO:0001701(in utero embryonic development);GO:0004601(peroxidase activity);GO:0005344(oxygen carrier activity);GO:0005506(iron ion binding);GO:0005615(extracellular space);GO:0005833(hemoglobin complex);GO:0009617(response to bacterium);GO:0015671(oxygen transport);GO:0019825(oxygen binding);GO:0020037(heme binding);GO:0022627(cytosolic small ribosomal subunit);GO:0031720(haptoglobin binding);GO:…	05143(African trypanosomiasis);05144(Malaria);05144(Malaria)	K13822	NA	hemoglobin alpha, adult chain 1 [Source:MGI Symbol;Acc:MGI:96015]	protein_coding;retained_intron	29.2551	23.3529	24.5165	32.4184	29.091	114.064	0.439273	-1.18681	0.00488316	0.574932	down	yes
ENSMUSG00000094497	Gm8210	ENSMUST00000178557	NA	NA	NA	NA	predicted pseudogene 8210 [Source:MGI Symbol;Acc:MGI:3643593]	processed_pseudogene	2.89251	3.70387	2.72842	41.3854	2.75018	2.53008	0.199821	-2.32322	0.00500044	0.583611	down	yes
ENSMUSG00000067149	Jchain	ENSMUST00000087033;ENSMUST00000164073	GO:0002250(adaptive immune response);GO:0003094(glomerular filtration);GO:0003697(single-stranded DNA binding);GO:0003823(antigen binding);GO:0005576(extracellular region);GO:0005615(extracellular space);GO:0006959(humoral immune response);GO:0019731(antibacterial humoral response);GO:0019862(IgA binding);GO:0030674(protein-macromolecule adaptor activity);GO:0031210(phosphatidylcholine binding);G…	NA	NA	NA	immunoglobulin joining chain [Source:MGI Symbol;Acc:MGI:96493]	protein_coding;retained_intron	1.17614	1.93625	1.70337	0.451907	0.795225	0.700135	2.47309	1.30632	0.00502719	0.583611	up	yes
ENSMUSG00000097414	B130046B21Rik	ENSMUST00000181510;ENSMUST00000230113;ENSMUST00000229573	NA	NA	NA	NA	RIKEN cDNA B130046B21 gene [Source:MGI Symbol;Acc:MGI:3704458]	antisense	0.193352	0.191712	0.193801	0.991782	0.987354	0.141469	0.272972	-1.87318	0.00527593	0.60486	down	yes
ENSMUSG00000064252	Olfr329	ENSMUST00000219448;ENSMUST00000108822;ENSMUST00000108823	GO:0004930(G protein-coupled receptor activity);GO:0004984(olfactory receptor activity);GO:0005886(plasma membrane);GO:0007165(signal transduction);GO:0007186(G protein-coupled receptor signaling pathway);GO:0007608(sensory perception of smell);GO:0016020(membrane);GO:0016021(integral component of membrane);GO:0050896(response to stimulus);GO:0050911(detection of chemical stimulus involved in sen…	04740(Olfactory transduction);04740(Olfactory transduction)	K04257	NA	olfactory receptor 329 [Source:MGI Symbol;Acc:MGI:3030163]	protein_coding	0.862675	0.919434	0.175288	0.220113	0.142825	0.209918	3.41691	1.77269	0.0052831	0.60486	up	yes
ENSMUSG00000068324	Gm10029	ENSMUST00000089635	NA	NA	NA	NA	predicted gene 10029 [Source:MGI Symbol;Acc:MGI:3641706]	processed_pseudogene	3.35247	3.30121	5.15112	5.70414	21.0702	7.6413	0.343007	-1.54369	0.00546459	0.609749	down	yes
ENSMUSG00000105852	Gm42890	ENSMUST00000167642;ENSMUST00000137168	NA	NA	NA	NA	predicted gene 42890 [Source:MGI Symbol;Acc:MGI:5663027]	retained_intron	0.96621	1.31006	1.47435	0.584624	0.196417	0.593737	2.72816	1.44793	0.00565239	0.613302	up	yes
ENSMUSG00000061780	Cfd	ENSMUST00000217837;ENSMUST00000061653	GO:0002376(immune system process);GO:0004175(endopeptidase activity);GO:0004252(serine-type endopeptidase activity);GO:0005576(extracellular region);GO:0005615(extracellular space);GO:0006508(proteolysis);GO:0006957(complement activation, alternative pathway);GO:0007219(Notch signaling pathway);GO:0008233(peptidase activity);GO:0008236(serine-type peptidase activity);GO:0009617(response to bacter…	04610(Complement and coagulation cascades);05150(Staphylococcus aureus infection);05150(Staphylococcus aureus infection)	K01334	EC:3.4.21.46	complement factor D (adipsin) [Source:MGI Symbol;Acc:MGI:87931]	protein_coding	2.36501	19.9066	2.16254	2.28004	2.32133	1.24701	4.17792	2.06279	0.0057946	0.616642	up	yes
ENSMUSG00000040490	Lrfn2	ENSMUST00000046254	GO:0005515(protein binding);GO:0005886(plasma membrane);GO:0009986(cell surface);GO:0016020(membrane);GO:0016021(integral component of membrane);GO:0030054(cell junction);GO:0045202(synapse);GO:0045211(postsynaptic membrane);GO:0050804(modulation of chemical synaptic transmission);GO:0098685(Schaffer collateral - CA1 synapse);GO:0099061(integral component of postsynaptic density membrane);GO:0099…	NA	K16355	NA	leucine rich repeat and fibronectin type III domain containing 2 [Source:MGI Symbol;Acc:MGI:1917780]	protein_coding	0.083445	0.145238	0.116819	0.251725	0.32642	0.386414	0.358197	-1.48118	0.00624778	0.648247	down	yes
ENSMUSG00000001131	Timp1	ENSMUST00000115342;ENSMUST00000009530	GO:0001775(cell activation);GO:0002020(protease binding);GO:0002248(connective tissue replacement involved in inflammatory response wound healing);GO:0004857(enzyme inhibitor activity);GO:0005125(cytokine activity);GO:0005515(protein binding);GO:0005576(extracellular region);GO:0005604(basement membrane);GO:0005615(extracellular space);GO:0007165(signal transduction);GO:0007568(aging);GO:0008083(…	04066(HIF-1 signaling pathway);04066(HIF-1 signaling pathway)	K16451	NA	tissue inhibitor of metalloproteinase 1 [Source:MGI Symbol;Acc:MGI:98752]	protein_coding	36.0259	278.138	93.2869	69.8936	47.0724	26.8964	2.83222	1.50194	0.00630218	0.649829	up	yes
ENSMUSG00000018411	Mapt	ENSMUST00000106992;ENSMUST00000132245;ENSMUST00000132977;ENSMUST00000106993;ENSMUST00000144836;ENSMUST00000145227;ENSMUST00000126820;ENSMUST00000100347;ENSMUST00000106988;ENSMUST00000138384;ENSMUST00000106989;ENSMUST00000146353	GO:0000226(microtubule cytoskeleton organization);GO:0001764(neuron migration);GO:0003677(DNA binding);GO:0005515(protein binding);GO:0005634(nucleus);GO:0005737(cytoplasm);GO:0005829(cytosol);GO:0005856(cytoskeleton);GO:0005874(microtubule);GO:0005886(plasma membrane);GO:0005930(axoneme);GO:0006915(apoptotic process);GO:0007409(axonogenesis);GO:0007416(synapse assembly);GO:0007584(response to nu…	04010(MAPK signaling pathway);05010(Alzheimer disease);05010(Alzheimer disease)	K04380	NA	microtubule-associated protein tau [Source:MGI Symbol;Acc:MGI:97180]	protein_coding;processed_transcript;retained_intron	0.288825	0.215912	0.433079	0.779606	0.581812	0.781769	0.43758	-1.19238	0.00675502	0.683781	down	yes
ENSMUSG00000106241	Gm43143	ENSMUST00000196083	NA	NA	NA	NA	predicted gene 43143 [Source:MGI Symbol;Acc:MGI:5663280]	TEC	0.143859	0.19218	0.112815	0.496821	0.500509	0.274175	0.35301	-1.50222	0.00715853	0.720235	down	yes
ENSMUSG00000098181	Rps12-ps24	ENSMUST00000182321	NA	NA	NA	NA	ribosomal protein S12, pseudogene 24 [Source:MGI Symbol;Acc:MGI:3642518]	processed_pseudogene	8.9535	8.31631	49.4435	3.21672	9.37443	6.89507	3.42362	1.77552	0.007264	0.722093	up	yes
ENSMUSG00000030208	Emp1	ENSMUST00000032330;ENSMUST00000204299;ENSMUST00000111907;ENSMUST00000205156;ENSMUST00000154270;ENSMUST00000204894	GO:0005886(plasma membrane);GO:0008219(cell death);GO:0016020(membrane);GO:0016021(integral component of membrane);GO:0032060(bleb assembly);GO:0032060(bleb assembly)	NA	NA	NA	epithelial membrane protein 1 [Source:MGI Symbol;Acc:MGI:107941]	protein_coding;retained_intron;nonsense_mediated_decay	1.59075	12.222	2.30995	1.86685	1.94929	1.63734	2.9564	1.56384	0.0075536	0.746413	up	yes
ENSMUSG00000052557	Gan	ENSMUST00000162997;ENSMUST00000064488	GO:0005515(protein binding);GO:0005737(cytoplasm);GO:0005856(cytoskeleton);GO:0007010(cytoskeleton organization);GO:0016567(protein ubiquitination);GO:0031463(Cul3-RING ubiquitin ligase complex);GO:0031463(Cul3-RING ubiquitin ligase complex)	NA	K10453	NA	giant axonal neuropathy [Source:MGI Symbol;Acc:MGI:1890619]	protein_coding	0.259013	0.324316	1.40278	0.191284	0.238108	0.25303	2.91038	1.54121	0.00818306	0.794426	up	yes
ENSMUSG00000082193	Rpl5-ps1	ENSMUST00000121367	NA	NA	NA	NA	ribosomal protein L5, pseudogene 1 [Source:MGI Symbol;Acc:MGI:3647110]	processed_pseudogene	17.6996	1.6452	24.6249	6.79851	2.48128	2.37662	3.77214	1.91538	0.00861357	0.826555	up	yes
ENSMUSG00000032258	Lca5	ENSMUST00000034791;ENSMUST00000190514;ENSMUST00000188548;ENSMUST00000188907;ENSMUST00000190373;ENSMUST00000190557;ENSMUST00000191225;ENSMUST00000186802;ENSMUST00000034793	GO:0005929(cilium);GO:0032391(photoreceptor connecting cilium);GO:0036064(ciliary basal body);GO:0044877(protein-containing complex binding);GO:0044877(protein-containing complex binding)	NA	NA	NA	Leber congenital amaurosis 5 (human) [Source:MGI Symbol;Acc:MGI:1923032]	protein_coding;nonsense_mediated_decay;processed_transcript;retained_intron	0.610241	0.652097	0.473183	1.32389	1.58054	0.753498	0.474455	-1.07566	0.00873797	0.82762	down	yes
ENSMUSG00000034587	8430429K09Rik	ENSMUST00000146456;ENSMUST00000144844;ENSMUST00000142397;ENSMUST00000136038;ENSMUST00000154397	NA	NA	NA	NA	RIKEN cDNA 8430429K09 gene [Source:MGI Symbol;Acc:MGI:1918773]	processed_transcript	2.41023	1.16618	1.56898	0.612236	0.902125	0.689548	2.33466	1.22321	0.00877423	0.82762	up	yes
ENSMUSG00000037887	Dusp8	ENSMUST00000039926;ENSMUST00000143661	GO:0000188(inactivation of MAPK activity);GO:0004721(phosphoprotein phosphatase activity);GO:0004725(protein tyrosine phosphatase activity);GO:0005634(nucleus);GO:0005737(cytoplasm);GO:0005829(cytosol);GO:0006470(protein dephosphorylation);GO:0008138(protein tyrosine/serine/threonine phosphatase activity);GO:0008330(protein tyrosine/threonine phosphatase activity);GO:0016311(dephosphorylation);GO…	04010(MAPK signaling pathway);04010(MAPK signaling pathway)	K04459	3.1.3.48;EC:3.1.3.16	dual specificity phosphatase 8 [Source:MGI Symbol;Acc:MGI:106626]	protein_coding	4.95546	0.702949	1.52146	0.73315	0.923944	0.870115	2.84102	1.50641	0.00891967	0.834377	up	yes
ENSMUSG00000071235	Vrtn	ENSMUST00000095551;ENSMUST00000167227;ENSMUST00000166772;ENSMUST00000221915;ENSMUST00000222319	GO:0000122(negative regulation of transcription by RNA polymerase II);GO:0001227(DNA-binding transcription repressor activity, RNA polymerase II-specific);GO:0005575(cellular_component);GO:0005575(cellular_component)	NA	NA	NA	vertebrae development associated [Source:MGI Symbol;Acc:MGI:3588197]	protein_coding	0.635783	0.665419	1.60158	2.00258	3.23922	1.64631	0.42142	-1.24667	0.00934028	0.842455	down	yes
ENSMUSG00000110529	Gm45694	ENSMUST00000212022	NA	NA	NA	NA	predicted gene 45694 [Source:MGI Symbol;Acc:MGI:5804809]	TEC	0.501785	0.617975	0.282013	0.142226	0.18058	0.203883	2.66148	1.41223	0.00943899	0.842455	up	yes
ENSMUSG00000031097	Tnni2	ENSMUST00000129618;ENSMUST00000210239;ENSMUST00000145287;ENSMUST00000211192;ENSMUST00000105971;ENSMUST00000105973;ENSMUST00000131034;ENSMUST00000149529	GO:0003009(skeletal muscle contraction);GO:0003779(actin binding);GO:0005634(nucleus);GO:0005861(troponin complex);GO:0006936(muscle contraction);GO:0006937(regulation of muscle contraction);GO:0031014(troponin T binding);GO:0045893(positive regulation of transcription, DNA-templated);GO:0046872(metal ion binding);GO:0060048(cardiac muscle contraction);GO:0060048(cardiac muscle contraction)	NA	K12043	NA	troponin I, skeletal, fast 2 [Source:MGI Symbol;Acc:MGI:105070]	retained_intron;protein_coding;processed_transcript	1.79773	1.45321	1.49216	0.479154	0.728152	0.775596	2.392	1.25822	0.00955823	0.843972	up	yes
ENSMUSG00000059974	Ntm	ENSMUST00000075069;ENSMUST00000124119;ENSMUST00000115237;ENSMUST00000126044;ENSMUST00000146651;ENSMUST00000115236;ENSMUST00000148606;ENSMUST00000151977;ENSMUST00000152513;ENSMUST00000155308;ENSMUST00000140118	GO:0005615(extracellular space);GO:0005886(plasma membrane);GO:0007155(cell adhesion);GO:0009986(cell surface);GO:0010977(negative regulation of neuron projection development);GO:0016020(membrane);GO:0030424(axon);GO:0031225(anchored component of membrane);GO:0048471(perinuclear region of cytoplasm);GO:0060076(excitatory synapse);GO:0060076(excitatory synapse)	NA	K06774	NA	neurotrimin [Source:MGI Symbol;Acc:MGI:2446259]	protein_coding;retained_intron;processed_transcript	0.289469	0.176848	0.037985	0.0269755	0.0593451	0.0552869	3.56127	1.83239	0.00958421	0.843972	up	yes
ENSMUSG00000081788	Gm5898	ENSMUST00000121016	NA	NA	NA	NA	predicted gene 5898 [Source:MGI Symbol;Acc:MGI:3644921]	processed_pseudogene	2.24423	0.688194	3.2292	0.695922	0.686693	0.900547	2.69872	1.43228	0.00986532	0.857456	up	yes
ENSMUSG00000046711	Hmga1	ENSMUST00000118570;ENSMUST00000117600;ENSMUST00000231874;ENSMUST00000232265;ENSMUST00000114888;ENSMUST00000119486;ENSMUST00000117254;ENSMUST00000231825;ENSMUST00000232253;ENSMUST00000118599;ENSMUST00000232552;ENSMUST00000231780;ENSMUST00000231866;ENSMUST00000231796;ENSMUST00000232013;ENSMUST00000231243;ENSMUST00000231358	GO:0000785(chromatin);GO:0000987(cis-regulatory region sequence-specific DNA binding);GO:0003677(DNA binding);GO:0003680(AT DNA binding);GO:0003682(chromatin binding);GO:0003713(transcription coactivator activity);GO:0003906(DNA-(apurinic or apyrimidinic site) endonuclease activity);GO:0005634(nucleus);GO:0005694(chromosome);GO:0006284(base-excision repair);GO:0006355(regulation of transcription,…	NA	K09282	NA	high mobility group AT-hook 1 [Source:MGI Symbol;Acc:MGI:96160]	protein_coding	12.0845	9.0897	3.70186	3.3255	4.13147	4.32691	2.11103	1.07795	0.0101585	0.870042	up	yes
ENSMUSG00000112022	Gm2436	ENSMUST00000219562	NA	03015(mRNA surveillance pathway);04071(Sphingolipid signaling pathway);04151(PI3K-Akt signaling pathway);04152(AMPK signaling pathway);04261(Adrenergic signaling in cardiomyocytes);04728(Dopaminergic synapse);05165(Human papillomavirus infection)	K11583	NA	predicted gene 2436 [Source:MGI Symbol;Acc:MGI:3780603]	unprocessed_pseudogene	1.65976	2.56533	0.0001	0.225184	0.0001	0.0001	18.7466	4.22856	0.0102097	0.870042	up	yes
ENSMUSG00000084260	Gm12844	ENSMUST00000119463	NA	NA	NA	NA	predicted gene 12844 [Source:MGI Symbol;Acc:MGI:3651053]	processed_pseudogene	0.873669	0.760804	0.737649	2.80014	0.806432	3.2356	0.346691	-1.52828	0.0102198	0.870042	down	yes
ENSMUSG00000042459	Bpifa2	ENSMUST00000048103;ENSMUST00000132933;ENSMUST00000136467;ENSMUST00000145388	GO:0001530(lipopolysaccharide binding);GO:0005576(extracellular region);GO:0005615(extracellular space);GO:0008150(biological_process);GO:0008289(lipid binding);GO:0030141(secretory granule);GO:0042742(defense response to bacterium);GO:0042742(defense response to bacterium)	NA	NA	NA	BPI fold containing family A, member 2 [Source:MGI Symbol;Acc:MGI:97787]	protein_coding;retained_intron	0.374871	0.691373	0.580109	0.143616	0.173744	0.267178	2.8165	1.4939	0.0104342	0.879279	up	yes
ENSMUSG00000030623	Prss23os	ENSMUST00000179361;ENSMUST00000032858;ENSMUST00000208814;ENSMUST00000209064	NA	NA	NA	NA	protease, serine 23, opposite strand [Source:MGI Symbol;Acc:MGI:1916654]	antisense	0.243448	0.593614	0.36609	0.853252	0.960767	1.19444	0.399922	-1.32221	0.0106054	0.889195	down	yes
ENSMUSG00000002803	Btbd6	ENSMUST00000002880;ENSMUST00000223368;ENSMUST00000220567;ENSMUST00000221104;ENSMUST00000165079;ENSMUST00000222209;ENSMUST00000223287;ENSMUST00000221500;ENSMUST00000223508	GO:0005515(protein binding);GO:0005737(cytoplasm);GO:0005829(cytosol);GO:0022008(neurogenesis);GO:0022008(neurogenesis)	NA	K10478	NA	BTB (POZ) domain containing 6 [Source:MGI Symbol;Acc:MGI:3026623]	protein_coding;retained_intron;nonsense_mediated_decay	1.1806	1.8828	2.21903	1.83781	2.79483	9.15595	0.383101	-1.3842	0.0108472	0.903946	down	yes
ENSMUSG00000021506	Pitx1	ENSMUST00000021968;ENSMUST00000173618	GO:0000978(RNA polymerase II cis-regulatory region sequence-specific DNA binding);GO:0000981(DNA-binding transcription factor activity, RNA polymerase II-specific);GO:0001085(RNA polymerase II transcription factor binding);GO:0001228(DNA-binding transcription activator activity, RNA polymerase II-specific);GO:0001501(skeletal system development);GO:0003677(DNA binding);GO:0003700(DNA-binding tran…	NA	K09356	NA	paired-like homeodomain transcription factor 1 [Source:MGI Symbol;Acc:MGI:107374]	protein_coding	0.321306	0.13132	0.845493	0.636407	4.22977	0.550631	0.239646	-2.06102	0.0108903	0.903946	down	yes
ENSMUSG00000031169	Porcn	ENSMUST00000122943;ENSMUST00000082320;ENSMUST00000139744;ENSMUST00000089402;ENSMUST00000089403;ENSMUST00000154695;ENSMUST00000077595	GO:0005515(protein binding);GO:0005783(endoplasmic reticulum);GO:0005789(endoplasmic reticulum membrane);GO:0006497(protein lipidation);GO:0008374(O-acyltransferase activity);GO:0009100(glycoprotein metabolic process);GO:0016020(membrane);GO:0016021(integral component of membrane);GO:0016055(Wnt signaling pathway);GO:0016740(transferase activity);GO:0016746(transferase activity, transferring acyl…	04310(Wnt signaling pathway);04310(Wnt signaling pathway)	K00181	EC:2.3.1.250	porcupine O-acyltransferase [Source:MGI Symbol;Acc:MGI:1890212]	nonsense_mediated_decay;protein_coding;retained_intron	3.4352	19.0179	4.19733	3.77318	3.89839	2.87454	2.52704	1.33745	0.0126524	1	up	yes
ENSMUSG00000052374	Actn2	ENSMUST00000064204;ENSMUST00000222034;ENSMUST00000221162;ENSMUST00000110616;ENSMUST00000168193	GO:0003779(actin binding);GO:0005509(calcium ion binding);GO:0005515(protein binding);GO:0005546(phosphatidylinositol-4,5-bisphosphate binding);GO:0005737(cytoplasm);GO:0005865(striated muscle thin filament);GO:0005886(plasma membrane);GO:0005925(focal adhesion);GO:0006936(muscle contraction);GO:0008092(cytoskeletal protein binding);GO:0019904(protein domain specific binding);GO:0030017(sarcomere…	05412(Arrhythmogenic right ventricular cardiomyopathy (ARVC));05412(Arrhythmogenic right ventricular cardiomyopathy (ARVC))	K21073	NA	actinin alpha 2 [Source:MGI Symbol;Acc:MGI:109192]	protein_coding;processed_transcript;retained_intron	0.49226	0.0431832	0.44477	0.113682	0.0975235	0.0357479	3.96922	1.98886	0.013278	1	up	yes
ENSMUSG00000038145	Snrk	ENSMUST00000120173;ENSMUST00000119215;ENSMUST00000134949;ENSMUST00000118886;ENSMUST00000131169;ENSMUST00000145384;ENSMUST00000215432;ENSMUST00000146832;ENSMUST00000217631;ENSMUST00000151872;ENSMUST00000139181;ENSMUST00000142784	GO:0000166(nucleotide binding);GO:0000287(magnesium ion binding);GO:0004672(protein kinase activity);GO:0004674(protein serine/threonine kinase activity);GO:0005524(ATP binding);GO:0005634(nucleus);GO:0005737(cytoplasm);GO:0006468(protein phosphorylation);GO:0016301(kinase activity);GO:0016310(phosphorylation);GO:0016740(transferase activity);GO:0035556(intracellular signal transduction);GO:00468…	NA	K08802	EC:2.7.11.1	SNF related kinase [Source:MGI Symbol;Acc:MGI:108104]	protein_coding;retained_intron;processed_transcript	12.7486	3.71691	2.65438	13.2057	12.3596	13.2663	0.492381	-1.02215	0.0133508	1	down	yes
ENSMUSG00000061039	Olfr920	ENSMUST00000074740	GO:0004930(G protein-coupled receptor activity);GO:0004984(olfactory receptor activity);GO:0005886(plasma membrane);GO:0007165(signal transduction);GO:0007186(G protein-coupled receptor signaling pathway);GO:0007608(sensory perception of smell);GO:0016020(membrane);GO:0016021(integral component of membrane);GO:0050896(response to stimulus);GO:0050911(detection of chemical stimulus involved in sen…	04740(Olfactory transduction)	K04257	NA	olfactory receptor 920 [Source:MGI Symbol;Acc:MGI:3030754]	protein_coding	0.17936	0.245808	0.210862	0.124145	0.054969	0.059031	2.67077	1.41725	0.0138167	1	up	yes
ENSMUSG00000072847	A530017D24Rik	ENSMUST00000101077;ENSMUST00000148413	NA	NA	NA	NA	RIKEN cDNA A530017D24 gene [Source:MGI Symbol;Acc:MGI:2144320]	lincRNA	1.84943	4.04355	4.54103	1.4401	1.70343	1.8462	2.09109	1.06426	0.0139356	1	up	yes
ENSMUSG00000109696	Gm36670	ENSMUST00000210400;ENSMUST00000210361	NA	NA	NA	NA	predicted gene, 36670 [Source:MGI Symbol;Acc:MGI:5595829]	lincRNA	0.254838	0.357633	0.0703857	0.554067	0.615556	0.70086	0.36507	-1.45376	0.0146517	1	down	yes
ENSMUSG00000048497	Mmgt2	ENSMUST00000129162;ENSMUST00000062860;ENSMUST00000142112;ENSMUST00000155759;ENSMUST00000148696;ENSMUST00000127589;ENSMUST00000148707	GO:0000139(Golgi membrane);GO:0005375(copper ion transmembrane transporter activity);GO:0005384(manganese ion transmembrane transporter activity);GO:0005768(endosome);GO:0005769(early endosome);GO:0005794(Golgi apparatus);GO:0005886(plasma membrane);GO:0006812(cation transport);GO:0006824(cobalt ion transport);GO:0006825(copper ion transport);GO:0006828(manganese ion transport);GO:0015087(cobalt …	NA	NA	NA	membrane magnesium transporter 2 [Source:MGI Symbol;Acc:MGI:2448491]	protein_coding;processed_transcript;retained_intron	5.06517	4.84805	6.92774	0.666581	0.626693	4.82728	2.75154	1.46024	0.0150525	1	up	yes
ENSMUSG00000078886	Gm2026	ENSMUST00000109007;ENSMUST00000109008;ENSMUST00000174416	GO:0003674(molecular_function);GO:0003676(nucleic acid binding);GO:0005575(cellular_component);GO:0005634(nucleus);GO:0006355(regulation of transcription, DNA-templated);GO:0008150(biological_process);GO:0010468(regulation of gene expression);GO:0046872(metal ion binding);GO:0046872(metal ion binding)	05168(Herpes simplex virus 1 infection);05168(Herpes simplex virus 1 infection)	K09228	NA	predicted gene 2026 [Source:MGI Symbol;Acc:MGI:3780195]	protein_coding	0.265675	0.0001	0.057091	1.18534	0.315645	0.233312	0.186165	-2.42534	0.0152979	1	down	yes
ENSMUSG00000072789	Gm10420	ENSMUST00000121713	NA	NA	NA	NA	predicted gene 10420 [Source:MGI Symbol;Acc:MGI:3704275]	processed_pseudogene	9.74077	21.2426	5.50009	11.9643	21.1179	52.8432	0.424595	-1.23584	0.0153238	1	down	yes
ENSMUSG00000000392	Fap	ENSMUST00000102732;ENSMUST00000174234;ENSMUST00000136297;ENSMUST00000172676;ENSMUST00000173745;ENSMUST00000152085;ENSMUST00000128139;ENSMUST00000174448;ENSMUST00000000402	GO:0001525(angiogenesis);GO:0002020(protease binding);GO:0004175(endopeptidase activity);GO:0004252(serine-type endopeptidase activity);GO:0005178(integrin binding);GO:0005576(extracellular region);GO:0005615(extracellular space);GO:0005886(plasma membrane);GO:0006508(proteolysis);GO:0006915(apoptotic process);GO:0007155(cell adhesion);GO:0008233(peptidase activity);GO:0008236(serine-type peptida…	NA	K08674	EC:3.4.21.-	fibroblast activation protein [Source:MGI Symbol;Acc:MGI:109608]	protein_coding;retained_intron;processed_transcript;nonsense_mediated_decay	0.418111	0.679159	0.584848	0.281106	0.270168	0.213137	2.20054	1.13786	0.0154551	1	up	yes
ENSMUSG00000053012	Krcc1	ENSMUST00000204436;ENSMUST00000080949;ENSMUST00000205123;ENSMUST00000168700	NA	NA	NA	NA	lysine-rich coiled-coil 1 [Source:MGI Symbol;Acc:MGI:1889377]	protein_coding	17.5065	19.2665	19.6887	3.47613	4.0177	17.7304	2.2384	1.16247	0.0158379	1	up	yes
ENSMUSG00000030862	Cpxm2	ENSMUST00000033149;ENSMUST00000127039;ENSMUST00000136188;ENSMUST00000150405;ENSMUST00000209155	GO:0004181(metallocarboxypeptidase activity);GO:0005576(extracellular region);GO:0006508(proteolysis);GO:0008270(zinc ion binding);GO:0008270(zinc ion binding)	NA	K08639	NA	carboxypeptidase X 2 (M14 family) [Source:MGI Symbol;Acc:MGI:1926006]	protein_coding;retained_intron;processed_transcript	0.582794	0.842652	2.05501	6.48956	3.09053	0.679232	0.339248	-1.55959	0.0161727	1	down	yes
ENSMUSG00000006221	Hspb7	ENSMUST00000102486	GO:0005634(nucleus);GO:0005654(nucleoplasm);GO:0005737(cytoplasm);GO:0005739(mitochondrion);GO:0007507(heart development);GO:0009408(response to heat);GO:0015030(Cajal body);GO:0015629(actin cytoskeleton);GO:0016235(aggresome);GO:0031005(filamin binding)	NA	K09546	NA	heat shock protein family, member 7 (cardiovascular) [Source:MGI Symbol;Acc:MGI:1352494]	protein_coding	1.57995	2.56383	0.82758	0.813246	0.753741	0.581827	2.31354	1.2101	0.0167489	1	up	yes
ENSMUSG00000014813	Stc1	ENSMUST00000014957	GO:0001503(ossification);GO:0001886(endothelial cell morphogenesis);GO:0003421(growth plate cartilage axis specification);GO:0005179(hormone activity);GO:0005576(extracellular region);GO:0005615(extracellular space);GO:0005634(nucleus);GO:0005737(cytoplasm);GO:0006874(cellular calcium ion homeostasis);GO:0007165(signal transduction);GO:0007566(embryo implantation);GO:0010596(negative regulation o…	NA	NA	NA	stanniocalcin 1 [Source:MGI Symbol;Acc:MGI:109131]	protein_coding	30.4321	7.17833	6.37167	3.7574	5.54268	9.77384	2.30588	1.20532	0.017125	1	up	yes
ENSMUSG00000103897	Pcdhga8	ENSMUST00000066149	GO:0003674(molecular_function);GO:0005509(calcium ion binding);GO:0005886(plasma membrane);GO:0007155(cell adhesion);GO:0007156(homophilic cell adhesion via plasma membrane adhesion molecules);GO:0008150(biological_process);GO:0016020(membrane);GO:0016021(integral component of membrane);GO:0046872(metal ion binding)	NA	K16495	NA	protocadherin gamma subfamily A, 8 [Source:MGI Symbol;Acc:MGI:1935221]	protein_coding	0.126417	0.110429	0.090905	0.222757	0.185895	0.383351	0.413825	-1.27291	0.0171338	1	down	yes
ENSMUSG00000037411	Serpine1	ENSMUST00000041388;ENSMUST00000199832;ENSMUST00000077523	GO:0001300(chronological cell aging);GO:0001525(angiogenesis);GO:0002020(protease binding);GO:0004867(serine-type endopeptidase inhibitor activity);GO:0005102(signaling receptor binding);GO:0005576(extracellular region);GO:0005615(extracellular space);GO:0010469(regulation of signaling receptor activity);GO:0010757(negative regulation of plasminogen activation);GO:0010951(negative regulation of e…	04066(HIF-1 signaling pathway);04115(p53 signaling pathway);04218(Cellular senescence);04371(Apelin signaling pathway);04390(Hippo signaling pathway);04610(Complement and coagulation cascades);04933(AGE-RAGE signaling pathway in diabetic complications);05142(Chagas disease (American trypanosomiasis));05142(Chagas disease (American trypanosomiasis))	K03982	NA	serine (or cysteine) peptidase inhibitor, clade E, member 1 [Source:MGI Symbol;Acc:MGI:97608]	protein_coding;retained_intron	0.891964	2.53338	0.235569	0.383245	0.445209	0.373266	3.04639	1.6071	0.0173139	1	up	yes
ENSMUSG00000111343	Gm47175	ENSMUST00000216940	NA	NA	NA	NA	predicted gene, 47175 [Source:MGI Symbol;Acc:MGI:6095958]	TEC	0.709668	0.476803	0.865572	0.120191	0.29264	0.369363	2.62345	1.39146	0.0179168	1	up	yes
ENSMUSG00000026393	Nek7	ENSMUST00000186017;ENSMUST00000027642;ENSMUST00000187407;ENSMUST00000191549	GO:0000166(nucleotide binding);GO:0000922(spindle pole);GO:0004672(protein kinase activity);GO:0004674(protein serine/threonine kinase activity);GO:0005515(protein binding);GO:0005524(ATP binding);GO:0005634(nucleus);GO:0005654(nucleoplasm);GO:0005737(cytoplasm);GO:0005815(microtubule organizing center);GO:0005856(cytoskeleton);GO:0006468(protein phosphorylation);GO:0016301(kinase activity);GO:00…	04621(NOD-like receptor signaling pathway);04621(NOD-like receptor signaling pathway)	K20876	EC:2.7.11.1	NIMA (never in mitosis gene a)-related expressed kinase 7 [Source:MGI Symbol;Acc:MGI:1890645]	protein_coding;retained_intron	12.0475	2.16137	1.5804	1.7449	2.14398	2.25197	2.57118	1.36243	0.0180026	1	up	yes
ENSMUSG00000030672	Mylpf	ENSMUST00000032910;ENSMUST00000206772;ENSMUST00000143222;ENSMUST00000206204;ENSMUST00000127710;ENSMUST00000139613	GO:0005509(calcium ion binding);GO:0006955(immune response);GO:0007519(skeletal muscle tissue development);GO:0008307(structural constituent of muscle);GO:0016459(myosin complex);GO:0046872(metal ion binding);GO:0046872(metal ion binding)	04510(Focal adhesion);04670(Leukocyte transendothelial migration);04810(Regulation of actin cytoskeleton);04810(Regulation of actin cytoskeleton)	K12758	NA	myosin light chain, phosphorylatable, fast skeletal muscle [Source:MGI Symbol;Acc:MGI:97273]	protein_coding;retained_intron	4.24964	2.10679	8.17613	1.94715	2.17594	2.06454	2.34865	1.23183	0.0184075	1	up	yes
ENSMUSG00000019464	Ptger1	ENSMUST00000019608;ENSMUST00000159935;ENSMUST00000212519	GO:0004930(G protein-coupled receptor activity);GO:0004955(prostaglandin receptor activity);GO:0004957(prostaglandin E receptor activity);GO:0005886(plasma membrane);GO:0006954(inflammatory response);GO:0007165(signal transduction);GO:0007186(G protein-coupled receptor signaling pathway);GO:0007189(adenylate cyclase-activating G protein-coupled receptor signaling pathway);GO:0007191(adenylate cyc…	04020(Calcium signaling pathway);04080(Neuroactive ligand-receptor interaction);05163(Human cytomegalovirus infection);05200(Pathways in cancer);05200(Pathways in cancer)	NA	NA	prostaglandin E receptor 1 (subtype EP1) [Source:MGI Symbol;Acc:MGI:97793]	protein_coding;retained_intron;processed_transcript	1.02254	0.983855	1.04123	0.712874	0.0976189	0.0518155	3.53427	1.82141	0.0184196	1	up	yes
ENSMUSG00000083754	Gm7803	ENSMUST00000117176	NA	NA	NA	NA	predicted gene 7803 [Source:MGI Symbol;Acc:MGI:3646089]	processed_pseudogene	2.61662	1.10503	4.41266	1.01266	0.913197	1.30915	2.51447	1.33025	0.0186916	1	up	yes
ENSMUSG00000093553	Gm20633	ENSMUST00000176742	NA	NA	NA	NA	predicted gene 20633 [Source:MGI Symbol;Acc:MGI:5313080]	antisense	2.21482	0.592521	1.99604	0.927305	0.309382	0.610249	2.60073	1.37892	0.0189194	1	up	yes
ENSMUSG00000110424	1700012D14Rik	ENSMUST00000210340;ENSMUST00000210788;ENSMUST00000209959;ENSMUST00000209597	NA	NA	NA	NA	RIKEN cDNA 1700012D14 gene [Source:MGI Symbol;Acc:MGI:1922729]	retained_intron;lincRNA	0.791681	0.59379	0.481631	0.313218	0.276688	0.247459	2.22973	1.15687	0.0192974	1	up	yes
ENSMUSG00000118061	Rbfaos	ENSMUST00000236423	NA	NA	NA	NA	ribosome binding factor A, opposite strand [Source:MGI Symbol;Acc:MGI:5011628]	lincRNA	0.816628	1.05323	0.53808	0.356355	0.26877	0.424724	2.2936	1.19761	0.0203777	1	up	yes
ENSMUSG00000042515	Pwwp3b	ENSMUST00000113043;ENSMUST00000113042;ENSMUST00000169886;ENSMUST00000113045;ENSMUST00000113041;ENSMUST00000139359;ENSMUST00000170671;ENSMUST00000166444	GO:0003674(molecular_function);GO:0008150(biological_process);GO:0008150(biological_process)	NA	NA	NA	PWWP domain containing 3B [Source:MGI Symbol;Acc:MGI:2445062]	protein_coding;retained_intron	4.27457	1.44917	1.14471	1.48537	0.735064	0.651459	2.39161	1.25798	0.0209095	1	up	yes
ENSMUSG00000061397	Krt79	ENSMUST00000023799;ENSMUST00000229195;ENSMUST00000230273;ENSMUST00000230441	GO:0005882(intermediate filament);GO:0019899(enzyme binding);GO:0045095(keratin filament);GO:0045095(keratin filament)	NA	K07605	NA	keratin 79 [Source:MGI Symbol;Acc:MGI:2385030]	protein_coding;processed_transcript;retained_intron	0.531227	1.71114	0.404424	0.342261	0.413607	0.299378	2.50822	1.32666	0.0212438	1	up	yes
ENSMUSG00000031903	Pla2g15	ENSMUST00000212963;ENSMUST00000034377;ENSMUST00000212116;ENSMUST00000212059	GO:0004623(phospholipase A2 activity);GO:0005576(extracellular region);GO:0005615(extracellular space);GO:0005654(nucleoplasm);GO:0005739(mitochondrion);GO:0005764(lysosome);GO:0006629(lipid metabolic process);GO:0006631(fatty acid metabolic process);GO:0006650(glycerophospholipid metabolic process);GO:0006651(diacylglycerol biosynthetic process);GO:0006672(ceramide metabolic process);GO:0008374(…	00564(Glycerophospholipid metabolism);04142(Lysosome);04142(Lysosome)	K06129	EC:3.1.1.5	phospholipase A2, group XV [Source:MGI Symbol;Acc:MGI:2178076]	protein_coding;retained_intron;processed_transcript	14.0167	14.5491	12.5552	12.6133	4.56981	3.10166	2.02719	1.01948	0.0217227	1	up	yes
ENSMUSG00000042179	Pnliprp1	ENSMUST00000235738;ENSMUST00000235461;ENSMUST00000236445;ENSMUST00000235509;ENSMUST00000235457;ENSMUST00000048644	GO:0004806(triglyceride lipase activity);GO:0005509(calcium ion binding);GO:0005515(protein binding);GO:0005576(extracellular region);GO:0005615(extracellular space);GO:0006629(lipid metabolic process);GO:0016298(lipase activity);GO:0046872(metal ion binding);GO:0052689(carboxylic ester hydrolase activity);GO:0052689(carboxylic ester hydrolase activity)	00561(Glycerolipid metabolism);04972(Pancreatic secretion);04975(Fat digestion and absorption);04975(Fat digestion and absorption)	K14074	EC:3.1.1.3	pancreatic lipase related protein 1 [Source:MGI Symbol;Acc:MGI:97723]	retained_intron;nonsense_mediated_decay;protein_coding	0.171351	0.245735	0.142525	0.261387	0.621332	0.495822	0.405945	-1.30064	0.0227864	1	down	yes
ENSMUSG00000035829	Ppp1r26	ENSMUST00000189694;ENSMUST00000040324;ENSMUST00000128199;ENSMUST00000150362;ENSMUST00000154081	GO:0004864(protein phosphatase inhibitor activity);GO:0005634(nucleus);GO:0005730(nucleolus);GO:0010923(negative regulation of phosphatase activity);GO:0032515(negative regulation of phosphoprotein phosphatase activity);GO:0032515(negative regulation of phosphoprotein phosphatase activity)	NA	K17565	NA	protein phosphatase 1, regulatory subunit 26 [Source:MGI Symbol;Acc:MGI:2685193]	protein_coding;processed_transcript	3.98669	1.29258	0.821551	0.646474	0.900335	1.09607	2.30841	1.2069	0.0227952	1	up	yes
ENSMUSG00000026628	Atf3	ENSMUST00000027941;ENSMUST00000195117;ENSMUST00000131854	GO:0000122(negative regulation of transcription by RNA polymerase II);GO:0000976(transcription regulatory region sequence-specific DNA binding);GO:0000977(RNA polymerase II regulatory region sequence-specific DNA binding);GO:0000978(RNA polymerase II cis-regulatory region sequence-specific DNA binding);GO:0000981(DNA-binding transcription factor activity, RNA polymerase II-specific);GO:0001227(DN…	NA	K09032	NA	activating transcription factor 3 [Source:MGI Symbol;Acc:MGI:109384]	protein_coding;processed_transcript	8.986	2.06982	4.50601	2.46368	2.87063	1.71142	2.20869	1.14319	0.0230417	1	up	yes
ENSMUSG00000066108	Muc5b	ENSMUST00000165147	GO:0003674(molecular_function);GO:0005515(protein binding);GO:0005615(extracellular space);GO:0042742(defense response to bacterium);GO:0043030(regulation of macrophage activation);GO:0043231(intracellular membrane-bounded organelle)	04657(IL-17 signaling pathway);04970(Salivary secretion)	K13908	NA	mucin 5, subtype B, tracheobronchial [Source:MGI Symbol;Acc:MGI:1921430]	protein_coding	0.049409	0.009148	0.103766	0.112851	0.224609	0.152551	0.331264	-1.59395	0.0232677	1	down	yes
ENSMUSG00000099875	Rbm3-ps	ENSMUST00000121422	NA	NA	NA	NA	RNA binding motif (RNP1, RRM) protein 3 [Source:MGI Symbol;Acc:MGI:3642874]	processed_pseudogene	6.47332	8.90014	9.45172	4.33448	3.61833	4.39754	2.01008	1.00725	0.0232803	1	up	yes
ENSMUSG00000037652	Phc3	ENSMUST00000152357;ENSMUST00000168645;ENSMUST00000129817;ENSMUST00000108255;ENSMUST00000064718;ENSMUST00000099163;ENSMUST00000046624;ENSMUST00000177992;ENSMUST00000150939;ENSMUST00000124472	GO:0003677(DNA binding);GO:0003682(chromatin binding);GO:0005515(protein binding);GO:0005634(nucleus);GO:0005654(nucleoplasm);GO:0007275(multicellular organism development);GO:0008270(zinc ion binding);GO:0031519(PcG protein complex);GO:0035102(PRC1 complex);GO:0042393(histone binding);GO:0045892(negative regulation of transcription, DNA-templated);GO:0046872(metal ion binding);GO:0046872(metal i…	NA	K11458	NA	polyhomeotic 3 [Source:MGI Symbol;Acc:MGI:2181434]	nonsense_mediated_decay;protein_coding;retained_intron	0.459746	2.69522	0.373342	2.54926	2.5826	2.89038	0.439816	-1.18503	0.0235682	1	down	yes
ENSMUSG00000115718	Gm49179	ENSMUST00000226752	NA	NA	NA	NA	predicted gene, 49179 [Source:MGI Symbol;Acc:MGI:6118614]	antisense	1.5234	0.543226	0.469639	0.226439	0.395803	0.453221	2.3583	1.23775	0.0236829	1	up	yes
ENSMUSG00000061082	Plac1	ENSMUST00000074861;ENSMUST00000114843;ENSMUST00000174390	GO:0001890(placenta development);GO:0003674(molecular_function);GO:0005575(cellular_component);GO:0005576(extracellular region);GO:0007275(multicellular organism development);GO:0090214(spongiotrophoblast layer developmental growth);GO:0090214(spongiotrophoblast layer developmental growth)	NA	NA	NA	placental specific protein 1 [Source:MGI Symbol;Acc:MGI:1926287]	protein_coding	0.674273	0.572712	0.487174	1.075	0.759916	2.11796	0.438709	-1.18866	0.0249565	1	down	yes
ENSMUSG00000051747	Ttn	ENSMUST00000099981;ENSMUST00000148747;ENSMUST00000140091;ENSMUST00000130915;ENSMUST00000155365;ENSMUST00000150741;ENSMUST00000149616;ENSMUST00000011934;ENSMUST00000126515;ENSMUST00000138542;ENSMUST00000137854;ENSMUST00000128071;ENSMUST00000134720;ENSMUST00000152185;ENSMUST00000156257;ENSMUST00000190813;ENSMUST00000142251;ENSMUST00000147048;ENSMUST00000123804;ENSMUST00000111846;ENSMUST00000139832;…	GO:0000166(nucleotide binding);GO:0000794(condensed nuclear chromosome);GO:0001701(in utero embryonic development);GO:0001756(somitogenesis);GO:0002020(protease binding);GO:0003007(heart morphogenesis);GO:0003300(cardiac muscle hypertrophy);GO:0004672(protein kinase activity);GO:0004674(protein serine/threonine kinase activity);GO:0004713(protein tyrosine kinase activity);GO:0005200(structural co…	05410(Hypertrophic cardiomyopathy (HCM));05414(Dilated cardiomyopathy (DCM));05414(Dilated cardiomyopathy (DCM))	K12567	EC:2.7.11.1	titin [Source:MGI Symbol;Acc:MGI:98864]	protein_coding;retained_intron;processed_transcript	0.0307058	0.00890157	0.0271138	0.00813941	0.0123811	0.00688776	2.43434	1.28353	0.0253738	1	up	yes
ENSMUSG00000089417	Gm22009	ENSMUST00000158792	NA	NA	NA	NA	predicted gene, 22009 [Source:MGI Symbol;Acc:MGI:5451786]	scaRNA	2.00713	1.14248	0.659183	4.6457	8.15317	0.387978	0.288833	-1.79169	0.0261259	1	down	yes
ENSMUSG00000104204	Gm37397	ENSMUST00000194579	NA	NA	NA	NA	predicted gene, 37397 [Source:MGI Symbol;Acc:MGI:5610625]	TEC	0.55304	0.562394	0.444104	0.141043	0.333789	0.203775	2.29815	1.20047	0.0264951	1	up	yes
ENSMUSG00000044681	Cnpy1	ENSMUST00000141601;ENSMUST00000117098;ENSMUST00000118882;ENSMUST00000120068;ENSMUST00000141196	GO:0003674(molecular_function);GO:0005783(endoplasmic reticulum);GO:0005783(endoplasmic reticulum)	NA	K22936	NA	canopy FGF signaling regulator 1 [Source:MGI Symbol;Acc:MGI:2442451]	protein_coding	0.270548	0.264574	0.130181	0.0652082	0.145282	0.0471912	2.58188	1.36842	0.0269316	1	up	yes
ENSMUSG00000023000	Dhh	ENSMUST00000023737;ENSMUST00000229775	GO:0001649(osteoblast differentiation);GO:0001708(cell fate specification);GO:0005113(patched binding);GO:0005509(calcium ion binding);GO:0005515(protein binding);GO:0005576(extracellular region);GO:0005615(extracellular space);GO:0005886(plasma membrane);GO:0006508(proteolysis);GO:0007224(smoothened signaling pathway);GO:0007267(cell-cell signaling);GO:0007275(multicellular organism development)…	04340(Hedgehog signaling pathway);04340(Hedgehog signaling pathway)	K11990	NA	desert hedgehog [Source:MGI Symbol;Acc:MGI:94891]	protein_coding	8.5784	1.58094	2.13151	6.43014	7.93076	11.5128	0.475033	-1.0739	0.0269615	1	down	yes
ENSMUSG00000078897	Gm4724	ENSMUST00000153210;ENSMUST00000152941;ENSMUST00000109045;ENSMUST00000109046	GO:0003674(molecular_function);GO:0003676(nucleic acid binding);GO:0005575(cellular_component);GO:0005634(nucleus);GO:0006355(regulation of transcription, DNA-templated);GO:0008150(biological_process);GO:0010468(regulation of gene expression);GO:0046872(metal ion binding);GO:0046872(metal ion binding)	05168(Herpes simplex virus 1 infection);05168(Herpes simplex virus 1 infection)	K09228	NA	predicted gene 4724 [Source:MGI Symbol;Acc:MGI:3782904]	processed_transcript;protein_coding	0.576994	0.594645	0.253966	0.0001	0.225547	0.0001	6.31506	2.6588	0.0271524	1	up	yes
ENSMUSG00000024512	Dynap	ENSMUST00000025390	GO:0003674(molecular_function);GO:0016020(membrane);GO:0016021(integral component of membrane)	NA	NA	NA	dynactin associated protein [Source:MGI Symbol;Acc:MGI:1922827]	protein_coding	4.29076	4.59717	1.28079	0.889397	2.18979	1.17575	2.38986	1.25693	0.0274778	1	up	yes
ENSMUSG00000039607	Rbms3	ENSMUST00000111773;ENSMUST00000111772;ENSMUST00000172469;ENSMUST00000172564;ENSMUST00000210659;ENSMUST00000069095;ENSMUST00000173429;ENSMUST00000239475;ENSMUST00000044901;ENSMUST00000164018;ENSMUST00000068962;ENSMUST00000174276;ENSMUST00000174868;ENSMUST00000084824	GO:0002357(defense response to tumor cell);GO:0003676(nucleic acid binding);GO:0003723(RNA binding);GO:0003730(mRNA 3'-UTR binding);GO:0005634(nucleus);GO:0005737(cytoplasm);GO:0005829(cytosol);GO:0008143(poly(A) binding);GO:0008266(poly(U) RNA binding);GO:0010628(positive regulation of gene expression);GO:0010629(negative regulation of gene expression);GO:0035925(mRNA 3'-UTR AU-rich region bindi…	NA	NA	NA	RNA binding motif, single stranded interacting protein [Source:MGI Symbol;Acc:MGI:2444477]	protein_coding;processed_transcript;retained_intron	2.79538	2.29001	1.44989	0.443015	0.371003	2.06826	2.2674	1.18104	0.0276934	1	up	yes
ENSMUSG00000059005	Hnrnpa3	ENSMUST00000111964;ENSMUST00000111962;ENSMUST00000132392;ENSMUST00000111961;ENSMUST00000141974;ENSMUST00000090792;ENSMUST00000164947	GO:0003676(nucleic acid binding);GO:0003723(RNA binding);GO:0003729(mRNA binding);GO:0005634(nucleus);GO:0005654(nucleoplasm);GO:0005681(spliceosomal complex);GO:0005737(cytoplasm);GO:0006397(mRNA processing);GO:0008380(RNA splicing);GO:0014069(postsynaptic density);GO:0019013(viral nucleocapsid);GO:0035770(ribonucleoprotein granule);GO:0043005(neuron projection);GO:0051028(mRNA transport);GO:005…	03040(Spliceosome);03040(Spliceosome)	K12741	NA	heterogeneous nuclear ribonucleoprotein A3 [Source:MGI Symbol;Acc:MGI:1917171]	protein_coding;retained_intron	0.46348	0.469055	0.463812	2.6309	0.445274	0.455918	0.395332	-1.33887	0.0280216	1	down	yes
ENSMUSG00000078490	Cfap74	ENSMUST00000238423;ENSMUST00000135407;ENSMUST00000094408;ENSMUST00000144157;ENSMUST00000165947;ENSMUST00000123952;ENSMUST00000151083;ENSMUST00000144625;ENSMUST00000105619;ENSMUST00000129481;ENSMUST00000238620;ENSMUST00000050128	GO:0003674(molecular_function);GO:0005575(cellular_component);GO:0005737(cytoplasm);GO:0005856(cytoskeleton);GO:0005929(cilium);GO:0005930(axoneme);GO:0008150(biological_process);GO:0035082(axoneme assembly);GO:0042995(cell projection);GO:0042995(cell projection)	NA	NA	NA	cilia and flagella associated protein 74 [Source:MGI Symbol;Acc:MGI:1917130]	protein_coding;retained_intron;processed_transcript	0.0576149	0.134685	0.044722	0.160622	0.177056	0.194431	0.445439	-1.1667	0.0284672	1	down	yes
ENSMUSG00000098950	Gm28036	ENSMUST00000132494;ENSMUST00000127956;ENSMUST00000183518;ENSMUST00000160165;ENSMUST00000183972;ENSMUST00000162612;ENSMUST00000184899;ENSMUST00000159952	GO:0003676(nucleic acid binding);GO:0003723(RNA binding);GO:0003824(catalytic activity);GO:0005654(nucleoplasm);GO:0030170(pyridoxal phosphate binding);GO:0031071(cysteine desulfurase activity);GO:0043484(regulation of RNA splicing);GO:0044571([2Fe-2S] cluster assembly);GO:1990904(ribonucleoprotein complex);GO:1990904(ribonucleoprotein complex)	NA	NA	NA	predicted gene, 28036 [Source:MGI Symbol;Acc:MGI:5547772]	nonsense_mediated_decay;protein_coding	2.6646	0.924199	0.985723	3.32631	0.80631	7.15641	0.405218	-1.30323	0.0285662	1	down	yes
ENSMUSG00000097113	Gm19705	ENSMUST00000181491;ENSMUST00000180962;ENSMUST00000181524;ENSMUST00000180495	NA	NA	NA	NA	predicted gene, 19705 [Source:MGI Symbol;Acc:MGI:5011890]	lincRNA	0.28579	1.51784	0.828845	0.389397	0.0426413	0.367612	3.29202	1.71897	0.02872	1	up	yes
ENSMUSG00000116946	Gm41442	ENSMUST00000232234;ENSMUST00000232655	NA	NA	NA	NA	predicted gene, 41442 [Source:MGI Symbol;Acc:MGI:5624327]	lincRNA	0.575769	0.441727	0.462956	0.309715	0.174196	0.202609	2.15646	1.10866	0.028988	1	up	yes
ENSMUSG00000040323	Gm15429	ENSMUST00000151268	NA	NA	NA	NA	predicted pseudogene 15429 [Source:MGI Symbol;Acc:MGI:3642423]	processed_pseudogene	6.19315	2.69701	4.57083	1.4918	1.15268	3.36502	2.23995	1.16347	0.0296779	1	up	yes
ENSMUSG00000040896	Kcnd3	ENSMUST00000079169;ENSMUST00000141694;ENSMUST00000098761;ENSMUST00000147209;ENSMUST00000118360	GO:0005216(ion channel activity);GO:0005244(voltage-gated ion channel activity);GO:0005249(voltage-gated potassium channel activity);GO:0005250(A-type (transient outward) potassium channel activity);GO:0005267(potassium channel activity);GO:0005515(protein binding);GO:0005886(plasma membrane);GO:0005887(integral component of plasma membrane);GO:0005901(caveola);GO:0006811(ion transport);GO:000681…	NA	K04893	NA	potassium voltage-gated channel, Shal-related family, member 3 [Source:MGI Symbol;Acc:MGI:1928743]	protein_coding;retained_intron;processed_transcript	0.294193	0.263249	1.79144	0.251586	0.377742	0.257679	2.6481	1.40496	0.0305049	1	up	yes
ENSMUSG00000000682	Cd52	ENSMUST00000000696;ENSMUST00000137445;ENSMUST00000145122	GO:0005886(plasma membrane);GO:0007204(positive regulation of cytosolic calcium ion concentration);GO:0009617(response to bacterium);GO:0016020(membrane);GO:0031225(anchored component of membrane);GO:0097225(sperm midpiece);GO:0097225(sperm midpiece)	NA	NA	NA	CD52 antigen [Source:MGI Symbol;Acc:MGI:1346088]	protein_coding;processed_transcript	7.21413	11.0496	10.1081	9.71753	41.9238	8.34254	0.472992	-1.08011	0.031243	1	down	yes
ENSMUSG00000072647	Adam1a	ENSMUST00000100757;ENSMUST00000200170	GO:0000166(nucleotide binding);GO:0002039(p53 binding);GO:0004222(metalloendopeptidase activity);GO:0004672(protein kinase activity);GO:0004674(protein serine/threonine kinase activity);GO:0005515(protein binding);GO:0005516(calmodulin binding);GO:0005524(ATP binding);GO:0005634(nucleus);GO:0005654(nucleoplasm);GO:0005737(cytoplasm);GO:0005829(cytosol);GO:0006417(regulation of translation);GO:000…	NA	K08607	EC:3.4.24.-	a disintegrin and metallopeptidase domain 1a [Source:MGI Symbol;Acc:MGI:2429504]	protein_coding	3.12201	1.11382	0.603412	0.645107	0.767859	0.817086	2.17001	1.1177	0.0313834	1	up	yes
ENSMUSG00000078877	Gm14295	ENSMUST00000118012;ENSMUST00000132883;ENSMUST00000179435	GO:0003674(molecular_function);GO:0003676(nucleic acid binding);GO:0005575(cellular_component);GO:0006355(regulation of transcription, DNA-templated);GO:0008150(biological_process);GO:0046872(metal ion binding);GO:0046872(metal ion binding)	NA	NA	NA	predicted gene 14295 [Source:MGI Symbol;Acc:MGI:3709624]	protein_coding	0.850823	0.842388	1.70798	0.681749	0.371799	0.57943	2.08281	1.05853	0.0326828	1	up	yes
ENSMUSG00000039699	Batf2	ENSMUST00000045042;ENSMUST00000135461;ENSMUST00000134150;ENSMUST00000141858;ENSMUST00000139326;ENSMUST00000237511;ENSMUST00000132750	GO:0000978(RNA polymerase II cis-regulatory region sequence-specific DNA binding);GO:0000981(DNA-binding transcription factor activity, RNA polymerase II-specific);GO:0003677(DNA binding);GO:0003700(DNA-binding transcription factor activity);GO:0005634(nucleus);GO:0006355(regulation of transcription, DNA-templated);GO:0006357(regulation of transcription by RNA polymerase II);GO:0030154(cell diffe…	NA	K09034	NA	basic leucine zipper transcription factor, ATF-like 2 [Source:MGI Symbol;Acc:MGI:1921731]	protein_coding;retained_intron;processed_transcript	0.23638	0.211057	0.251569	0.395282	0.477929	0.605843	0.472603	-1.0813	0.0328296	1	down	yes
ENSMUSG00000043822	Adamtsl5	ENSMUST00000124789;ENSMUST00000138705;ENSMUST00000095446;ENSMUST00000137576;ENSMUST00000128845;ENSMUST00000105352;ENSMUST00000137571	GO:0001527(microfibril);GO:0004222(metalloendopeptidase activity);GO:0005515(protein binding);GO:0005576(extracellular region);GO:0006508(proteolysis);GO:0008201(heparin binding);GO:0030198(extracellular matrix organization);GO:0031012(extracellular matrix);GO:0062023(collagen-containing extracellular matrix);GO:0062023(collagen-containing extracellular matrix)	NA	NA	NA	ADAMTS-like 5 [Source:MGI Symbol;Acc:MGI:1913798]	retained_intron;processed_transcript;protein_coding	0.407015	0.418289	0.333982	0.183964	0.175223	0.195443	2.0902	1.06364	0.0329136	1	up	yes
ENSMUSG00000072596	Ear2	ENSMUST00000074839	GO:0003676(nucleic acid binding);GO:0004518(nuclease activity);GO:0004519(endonuclease activity);GO:0004540(ribonuclease activity);GO:0005575(cellular_component);GO:0006935(chemotaxis);GO:0016787(hydrolase activity);GO:0090305(nucleic acid phosphodiester bond hydrolysis);GO:0090501(RNA phosphodiester bond hydrolysis)	NA	NA	NA	eosinophil-associated, ribonuclease A family, member 2 [Source:MGI Symbol;Acc:MGI:108020]	protein_coding	1.2794	1.75348	2.37895	2.09117	11.2887	1.49397	0.363848	-1.45859	0.0331821	1	down	yes
ENSMUSG00000075334	Rprm	ENSMUST00000100089	GO:0003674(molecular_function);GO:0005737(cytoplasm);GO:0007050(cell cycle arrest);GO:0007346(regulation of mitotic cell cycle);GO:0016020(membrane);GO:0016021(integral component of membrane)	04115(p53 signaling pathway)	K10128	NA	reprimo, TP53 dependent G2 arrest mediator candidate [Source:MGI Symbol;Acc:MGI:1915124]	protein_coding	0.16337	0.747186	0.820896	0.314413	0.197541	0.064154	3.00543	1.58757	0.0336011	1	up	yes
ENSMUSG00000097819	Gm26813	ENSMUST00000180778	NA	NA	NA	NA	predicted gene, 26813 [Source:MGI Symbol;Acc:MGI:5477307]	lincRNA	0.400364	0.153326	0.254275	0.114787	0.100128	0.134129	2.31479	1.21088	0.0343882	1	up	yes
ENSMUSG00000044250	Pced1b	ENSMUST00000228521;ENSMUST00000059433;ENSMUST00000226615;ENSMUST00000226495	GO:0003674(molecular_function);GO:0005575(cellular_component);GO:0008150(biological_process);GO:0008150(biological_process)	NA	NA	NA	PC-esterase domain containing 1B [Source:MGI Symbol;Acc:MGI:2446270]	protein_coding;processed_transcript	3.82748	3.67081	2.57658	2.56751	17.5126	3.21966	0.432402	-1.20956	0.0346416	1	down	yes
ENSMUSG00000074646	6430550D23Rik	ENSMUST00000109617;ENSMUST00000086145;ENSMUST00000144686;ENSMUST00000156993;ENSMUST00000138025;ENSMUST00000141437;ENSMUST00000140657;ENSMUST00000139116;ENSMUST00000124812	GO:0016020(membrane);GO:0016021(integral component of membrane);GO:0016021(integral component of membrane)	NA	NA	NA	RIKEN cDNA 6430550D23 gene [Source:MGI Symbol;Acc:MGI:2443361]	protein_coding;retained_intron;nonsense_mediated_decay	0.249805	0.181221	0.19973	0.0722095	0.120909	0.0948085	2.19068	1.13138	0.0350023	1	up	yes
ENSMUSG00000073640	Rpl27-ps3	ENSMUST00000097682	NA	NA	NA	NA	ribosomal protein L27, pseudogene 3 [Source:MGI Symbol;Acc:MGI:3646174]	processed_pseudogene	18.6037	10.3362	26.5964	85.3366	36.0992	9.57392	0.42391	-1.23817	0.0350042	1	down	yes
ENSMUSG00000025461	Cd163l1	ENSMUST00000211540;ENSMUST00000209398;ENSMUST00000209376;ENSMUST00000084460;ENSMUST00000209840;ENSMUST00000209637;ENSMUST00000210159	GO:0003674(molecular_function);GO:0005044(scavenger receptor activity);GO:0005737(cytoplasm);GO:0005886(plasma membrane);GO:0005903(brush border);GO:0006897(endocytosis);GO:0008150(biological_process);GO:0009897(external side of plasma membrane);GO:0016020(membrane);GO:0016021(integral component of membrane);GO:0016021(integral component of membrane)	NA	NA	NA	CD163 molecule-like 1 [Source:MGI Symbol;Acc:MGI:2443796]	retained_intron;protein_coding	0.405712	0.253173	0.181404	0.123977	0.15946	0.0314108	2.66887	1.41623	0.0352294	1	up	yes
ENSMUSG00000087263	Gm15726	ENSMUST00000144738	NA	NA	NA	NA	predicted gene 15726 [Source:MGI Symbol;Acc:MGI:3783169]	antisense	0.162253	1.4934	1.04095	2.92541	2.68718	1.56199	0.375855	-1.41175	0.0355757	1	down	yes
ENSMUSG00000075609	Gm7935	ENSMUST00000100555	NA	NA	NA	NA	predicted pseudogene 7935 [Source:MGI Symbol;Acc:MGI:3646370]	processed_pseudogene	1.4541	0.421473	0.745661	0.987643	2.25091	2.83824	0.431351	-1.21307	0.0359062	1	down	yes
ENSMUSG00000029173	Sepsecs	ENSMUST00000031069;ENSMUST00000123856;ENSMUST00000150709;ENSMUST00000199425;ENSMUST00000126574	GO:0000049(tRNA binding);GO:0001514(selenocysteine incorporation);GO:0003723(RNA binding);GO:0003824(catalytic activity);GO:0005515(protein binding);GO:0005634(nucleus);GO:0005737(cytoplasm);GO:0006412(translation);GO:0016020(membrane);GO:0016021(integral component of membrane);GO:0016740(transferase activity);GO:0016785(transferase activity, transferring selenium-containing groups);GO:0097056(se…	00450(Selenocompound metabolism);00970(Aminoacyl-tRNA biosynthesis);00970(Aminoacyl-tRNA biosynthesis)	K03341	EC:2.9.1.2	Sep (O-phosphoserine) tRNA:Sec (selenocysteine) tRNA synthase [Source:MGI Symbol;Acc:MGI:1098791]	protein_coding;nonsense_mediated_decay;retained_intron	0.463333	0.368525	2.52716	2.51906	2.56992	2.81372	0.425047	-1.23431	0.0374616	1	down	yes
ENSMUSG00000026639	Lamb3	ENSMUST00000194677;ENSMUST00000016315;ENSMUST00000162977;ENSMUST00000161526;ENSMUST00000192322;ENSMUST00000162180;ENSMUST00000194407;ENSMUST00000193128;ENSMUST00000159955	GO:0005201(extracellular matrix structural constituent);GO:0005576(extracellular region);GO:0005604(basement membrane);GO:0005610(laminin-5 complex);GO:0007155(cell adhesion);GO:0009887(animal organ morphogenesis);GO:0009888(tissue development);GO:0016477(cell migration);GO:0034446(substrate adhesion-dependent cell spreading);GO:0035987(endodermal cell differentiation);GO:0043256(laminin complex)…	04151(PI3K-Akt signaling pathway);04510(Focal adhesion);04512(ECM-receptor interaction);05145(Toxoplasmosis);05146(Amoebiasis);05165(Human papillomavirus infection);05200(Pathways in cancer);05222(Small cell lung cancer);05222(Small cell lung cancer)	K06244	NA	laminin, beta 3 [Source:MGI Symbol;Acc:MGI:99915]	protein_coding;processed_transcript;retained_intron	0.159569	0.202361	0.134324	0.0454415	0.0781826	0.0981888	2.23726	1.16173	0.0382543	1	up	yes
ENSMUSG00000096045	Gm21698	ENSMUST00000191203;ENSMUST00000178487	NA	NA	NA	NA	predicted gene, 21698 [Source:MGI Symbol;Acc:MGI:5435053]	protein_coding	0.680324	0.287834	0.288236	1.05915	1.64338	0.312952	0.416648	-1.2631	0.0383027	1	down	yes
ENSMUSG00000032611	1700102P08Rik	ENSMUST00000035234;ENSMUST00000192995	NA	NA	NA	NA	RIKEN cDNA 1700102P08 gene [Source:MGI Symbol;Acc:MGI:2148248]	protein_coding	0.375135	0.371723	0.5476	0.957323	1.20376	0.632697	0.463336	-1.10987	0.0385128	1	down	yes
ENSMUSG00000085881	Gm15912	ENSMUST00000222385;ENSMUST00000128914	NA	NA	NA	NA	predicted gene 15912 [Source:MGI Symbol;Acc:MGI:3801895]	retained_intron;lincRNA	1.01231	1.10444	1.07961	0.452019	0.724482	0.142508	2.4233	1.27697	0.0387622	1	up	yes
ENSMUSG00000057246	BC051142	ENSMUST00000097348;ENSMUST00000139063;ENSMUST00000142208;ENSMUST00000142317;ENSMUST00000149121;ENSMUST00000223957;ENSMUST00000135217;ENSMUST00000223765;ENSMUST00000236732;ENSMUST00000114175;ENSMUST00000131998;ENSMUST00000235202;ENSMUST00000078615	GO:0003674(molecular_function);GO:0005575(cellular_component);GO:0008150(biological_process);GO:0016020(membrane);GO:0016021(integral component of membrane);GO:0016021(integral component of membrane)	NA	NA	NA	cDNA sequence BC051142 [Source:MGI Symbol;Acc:MGI:3039565]	protein_coding;retained_intron;processed_transcript;nonsense_mediated_decay	0.201376	0.214574	0.305085	0.0911986	0.0766657	0.148369	2.28007	1.18908	0.0388334	1	up	yes
ENSMUSG00000109147	4930431P19Rik	ENSMUST00000207761;ENSMUST00000207570	NA	NA	NA	NA	RIKEN cDNA 4930431P19 gene [Source:MGI Symbol;Acc:MGI:1921136]	processed_transcript;transcribed_processed_pseudogene	0.957875	1.11844	0.698957	0.0106198	0.00666349	0.599588	4.49895	2.16959	0.0390224	1	up	yes
ENSMUSG00000020836	Coro6	ENSMUST00000102493;ENSMUST00000021190;ENSMUST00000052515;ENSMUST00000108391;ENSMUST00000079770;ENSMUST00000130255	GO:0005515(protein binding);GO:0007015(actin filament organization);GO:0016477(cell migration);GO:0051015(actin filament binding);GO:0051015(actin filament binding)	NA	K13886	NA	coronin 6 [Source:MGI Symbol;Acc:MGI:2183448]	protein_coding	1.47186	1.15234	0.527013	0.189123	0.527568	0.669835	2.27274	1.18443	0.0399115	1	up	yes
ENSMUSG00000059897	Zfp930	ENSMUST00000212681;ENSMUST00000110216;ENSMUST00000212312;ENSMUST00000212020	GO:0003676(nucleic acid binding);GO:0005634(nucleus);GO:0006355(regulation of transcription, DNA-templated);GO:0010468(regulation of gene expression);GO:0046872(metal ion binding);GO:0046872(metal ion binding)	05168(Herpes simplex virus 1 infection);05168(Herpes simplex virus 1 infection)	K09228	NA	zinc finger protein 930 [Source:MGI Symbol;Acc:MGI:2675306]	protein_coding;retained_intron	1.5915	1.15203	1.02799	0.694284	0.835553	0.154843	2.23871	1.16267	0.0399244	1	up	yes
ENSMUSG00000037225	Fgf2	ENSMUST00000200585;ENSMUST00000091203;ENSMUST00000199938;ENSMUST00000138563;ENSMUST00000145228;ENSMUST00000150021;ENSMUST00000108120;ENSMUST00000038885	GO:0000186(activation of MAPKK activity);GO:0001525(angiogenesis);GO:0001658(branching involved in ureteric bud morphogenesis);GO:0001759(organ induction);GO:0001934(positive regulation of protein phosphorylation);GO:0001938(positive regulation of endothelial cell proliferation);GO:0002042(cell migration involved in sprouting angiogenesis);GO:0005104(fibroblast growth factor receptor binding);GO:…	01521(EGFR tyrosine kinase inhibitor resistance);04010(MAPK signaling pathway);04014(Ras signaling pathway);04015(Rap1 signaling pathway);04151(PI3K-Akt signaling pathway);04550(Signaling pathways regulating pluripotency of stem cells);04810(Regulation of actin cytoskeleton);05167(Kaposi sarcoma-associated herpesvirus infection);05200(Pathways in cancer);05205(Proteoglycans in cancer);05218(Melan…	K18497	NA	fibroblast growth factor 2 [Source:MGI Symbol;Acc:MGI:95516]	protein_coding;retained_intron;processed_transcript	3.31375	3.41316	1.89824	1.62148	0.13879	1.73288	2.46917	1.30402	0.0404615	1	up	yes
ENSMUSG00000025243	Slc6a20b	ENSMUST00000026273;ENSMUST00000163397;ENSMUST00000166800;ENSMUST00000164241;ENSMUST00000168824;ENSMUST00000171122	GO:0005328(neurotransmitter:sodium symporter activity);GO:0005515(protein binding);GO:0005886(plasma membrane);GO:0005887(integral component of plasma membrane);GO:0015193(L-proline transmembrane transporter activity);GO:0015293(symporter activity);GO:0016020(membrane);GO:0016021(integral component of membrane);GO:0016324(apical plasma membrane);GO:0031526(brush border membrane);GO:0035524(prolin…	NA	NA	NA	solute carrier family 6 (neurotransmitter transporter), member 20B [Source:MGI Symbol;Acc:MGI:1336891]	protein_coding;nonsense_mediated_decay;processed_transcript	0.769906	0.124051	0.0728099	0.0796604	0.148434	0.0969622	2.97415	1.57248	0.0406691	1	up	yes
ENSMUSG00000037638	Zbtb42	ENSMUST00000169593;ENSMUST00000173942;ENSMUST00000174780	GO:0000122(negative regulation of transcription by RNA polymerase II);GO:0003676(nucleic acid binding);GO:0003677(DNA binding);GO:0005515(protein binding);GO:0005634(nucleus);GO:0005654(nucleoplasm);GO:0005737(cytoplasm);GO:0005886(plasma membrane);GO:0006974(cellular response to DNA damage stimulus);GO:0007517(muscle organ development);GO:0046872(metal ion binding);GO:0046872(metal ion binding)	NA	NA	NA	zinc finger and BTB domain containing 42 [Source:MGI Symbol;Acc:MGI:3644133]	protein_coding	1.75467	1.52687	1.42954	0.176557	1.32898	0.0750278	2.98063	1.57562	0.0407269	1	up	yes
ENSMUSG00000092365	BC023719	ENSMUST00000174728	NA	NA	NA	NA	cDNA sequence BC023719 [Source:MGI Symbol;Acc:MGI:3574836]	antisense	1.25412	0.0001	0.958009	0.0001	0.063953	0.304761	5.99823	2.58454	0.0415185	1	up	yes
ENSMUSG00000067929	Gm10226	ENSMUST00000072133	GO:0003676(nucleic acid binding);GO:0005575(cellular_component)	NA	NA	NA	predicted gene 10226 [Source:MGI Symbol;Acc:MGI:3704470]	protein_coding	2.3591	5.45017	6.424	2.39213	1.00973	2.60332	2.37016	1.24499	0.041726	1	up	yes
ENSMUSG00000099041	Gm28035	ENSMUST00000139454	GO:0002329(pre-B cell differentiation);GO:0005225(volume-sensitive anion channel activity);GO:0005253(anion channel activity);GO:0005886(plasma membrane);GO:0005887(integral component of plasma membrane);GO:0006811(ion transport);GO:0006820(anion transport);GO:0006884(cell volume homeostasis);GO:0006970(response to osmotic stress);GO:0009986(cell surface);GO:0015698(inorganic anion transport);GO:…	NA	NA	NA	predicted gene, 28035 [Source:MGI Symbol;Acc:MGI:5547771]	nonsense_mediated_decay	0.161142	0.294626	0.65309	0.121212	0.069812	0.250494	2.51147	1.32853	0.0422405	1	up	yes
ENSMUSG00000096472	Cdkn2d	ENSMUST00000215619;ENSMUST00000086374;ENSMUST00000213407	GO:0000079(regulation of cyclin-dependent protein serine/threonine kinase activity);GO:0000082(G1/S transition of mitotic cell cycle);GO:0000731(DNA synthesis involved in DNA repair);GO:0004861(cyclin-dependent protein serine/threonine kinase inhibitor activity);GO:0005515(protein binding);GO:0005634(nucleus);GO:0005654(nucleoplasm);GO:0005737(cytoplasm);GO:0005829(cytosol);GO:0007049(cell cycle)…	04068(FoxO signaling pathway);04110(Cell cycle);04110(Cell cycle)	K06623	NA	cyclin dependent kinase inhibitor 2D [Source:MGI Symbol;Acc:MGI:105387]	protein_coding	3.87448	0.959521	4.95191	7.17737	6.26231	6.29298	0.495925	-1.01181	0.043673	1	down	yes
ENSMUSG00000032172	Olfm2	ENSMUST00000034692;ENSMUST00000217198;ENSMUST00000215999;ENSMUST00000215039	GO:0005515(protein binding);GO:0005576(extracellular region);GO:0005634(nucleus);GO:0005654(nucleoplasm);GO:0005737(cytoplasm);GO:0007601(visual perception);GO:0007626(locomotory behavior);GO:0009306(protein secretion);GO:0016020(membrane);GO:0030054(cell junction);GO:0032281(AMPA glutamate receptor complex);GO:0045202(synapse);GO:0051152(positive regulation of smooth muscle cell differentiation)…	NA	NA	NA	olfactomedin 2 [Source:MGI Symbol;Acc:MGI:3045350]	protein_coding;retained_intron	1.78952	1.70276	0.422914	0.376046	0.412497	0.8989	2.3202	1.21425	0.0437926	1	up	yes
ENSMUSG00000023067	Cdkn1a	ENSMUST00000122348;ENSMUST00000023829;ENSMUST00000233296;ENSMUST00000119901;ENSMUST00000232979	GO:0000079(regulation of cyclin-dependent protein serine/threonine kinase activity);GO:0000082(G1/S transition of mitotic cell cycle);GO:0000086(G2/M transition of mitotic cell cycle);GO:0000307(cyclin-dependent protein kinase holoenzyme complex);GO:0004860(protein kinase inhibitor activity);GO:0004861(cyclin-dependent protein serine/threonine kinase inhibitor activity);GO:0005515(protein binding…	01522(Endocrine resistance);01524(Platinum drug resistance);04012(ErbB signaling pathway);04066(HIF-1 signaling pathway);04068(FoxO signaling pathway);04110(Cell cycle);04115(p53 signaling pathway);04151(PI3K-Akt signaling pathway);04218(Cellular senescence);04630(Jak-STAT signaling pathway);04921(Oxytocin signaling pathway);04928(Parathyroid hormone synthesis, secretion and action);04934(Cushing…	K06625	NA	cyclin-dependent kinase inhibitor 1A (P21) [Source:MGI Symbol;Acc:MGI:104556]	protein_coding;processed_transcript	3.23252	19.6646	5.62872	5.25367	5.14761	3.34	2.07593	1.05375	0.0438334	1	up	yes
ENSMUSG00000084938	BB557941	ENSMUST00000126549	NA	NA	NA	NA	expressed sequence BB557941 [Source:MGI Symbol;Acc:MGI:3034820]	processed_transcript	0.878222	0.822929	0.611616	0.38199	0.244582	0.425939	2.19738	1.13578	0.0439645	1	up	yes
ENSMUSG00000104824	Gm21663	ENSMUST00000196214	NA	NA	NA	NA	predicted gene, 21663 [Source:MGI Symbol;Acc:MGI:5435018]	protein_coding	0.764832	0.399451	0.231152	0.948499	1.7567	0.45997	0.440872	-1.18157	0.044034	1	down	yes
ENSMUSG00000053475	Tnfaip6	ENSMUST00000065927	GO:0005540(hyaluronic acid binding);GO:0005615(extracellular space);GO:0007155(cell adhesion);GO:0030335(positive regulation of cell migration);GO:0030728(ovulation);GO:0050728(negative regulation of inflammatory response)	NA	K19018	NA	tumor necrosis factor alpha induced protein 6 [Source:MGI Symbol;Acc:MGI:1195266]	protein_coding	0.080601	0.427951	0.222665	0.569751	0.747105	0.42084	0.420797	-1.2488	0.0441923	1	down	yes
ENSMUSG00000097194	9330175E14Rik	ENSMUST00000180612;ENSMUST00000180445	NA	NA	NA	NA	RIKEN cDNA 9330175E14 gene [Source:MGI Symbol;Acc:MGI:2443913]	lincRNA	0.030006	0.0251972	0.116378	0.0853158	0.153159	0.218076	0.375821	-1.41188	0.0445819	1	down	yes
ENSMUSG00000029999	Tgfa	ENSMUST00000032066;ENSMUST00000193710;ENSMUST00000192058;ENSMUST00000194449	GO:0000187(activation of MAPK activity);GO:0001525(angiogenesis);GO:0005154(epidermal growth factor receptor binding);GO:0005515(protein binding);GO:0005576(extracellular region);GO:0005615(extracellular space);GO:0005634(nucleus);GO:0005886(plasma membrane);GO:0007173(epidermal growth factor receptor signaling pathway);GO:0008083(growth factor activity);GO:0008284(positive regulation of cell pop…	01521(EGFR tyrosine kinase inhibitor resistance);04010(MAPK signaling pathway);04012(ErbB signaling pathway);04014(Ras signaling pathway);04151(PI3K-Akt signaling pathway);04915(Estrogen signaling pathway);05200(Pathways in cancer);05210(Colorectal cancer);05211(Renal cell carcinoma);05212(Pancreatic cancer);05214(Glioma);05215(Prostate cancer);05223(Non-small cell lung cancer);05225(Hepatocellul…	K08774	NA	transforming growth factor alpha [Source:MGI Symbol;Acc:MGI:98724]	protein_coding;processed_transcript	6.05889	7.2753	0.778558	13.0525	8.21866	6.98842	0.499397	-1.00174	0.0447648	1	down	yes
ENSMUSG00000049734	Trex1	ENSMUST00000061973;ENSMUST00000112053	GO:0000287(magnesium ion binding);GO:0001568(blood vessel development);GO:0001822(kidney development);GO:0002250(adaptive immune response);GO:0002251(organ or tissue specific immune response);GO:0002253(activation of immune response);GO:0002281(macrophage activation involved in immune response);GO:0002320(lymphoid progenitor cell differentiation);GO:0002379(immunoglobulin biosynthetic process inv…	04623(Cytosolic DNA-sensing pathway);04623(Cytosolic DNA-sensing pathway)	K10790	EC:3.1.11.2	three prime repair exonuclease 1 [Source:MGI Symbol;Acc:MGI:1328317]	protein_coding	2.5645	1.51972	2.07727	2.09502	7.29597	3.09091	0.493634	-1.01849	0.0450141	1	down	yes
ENSMUSG00000089875	Etohd2	ENSMUST00000162450;ENSMUST00000225619;ENSMUST00000163053	NA	NA	NA	NA	ethanol decreased 2 [Source:MGI Symbol;Acc:MGI:1261417]	antisense	1.26983	0.183205	1.27565	1.81241	1.93702	2.13487	0.463721	-1.10867	0.0462339	1	down	yes
ENSMUSG00000036743	Psma8	ENSMUST00000040860;ENSMUST00000234922;ENSMUST00000234869;ENSMUST00000234680;ENSMUST00000234177;ENSMUST00000235037;ENSMUST00000234318	GO:0000502(proteasome complex);GO:0004175(endopeptidase activity);GO:0004298(threonine-type endopeptidase activity);GO:0005515(protein binding);GO:0005634(nucleus);GO:0005654(nucleoplasm);GO:0005737(cytoplasm);GO:0005829(cytosol);GO:0005839(proteasome core complex);GO:0006508(proteolysis);GO:0006511(ubiquitin-dependent protein catabolic process);GO:0007283(spermatogenesis);GO:0008233(peptidase ac…	03050(Proteasome);03050(Proteasome)	K02731	EC:3.4.25.1	proteasome subunit alpha 8 [Source:MGI Symbol;Acc:MGI:1920927]	protein_coding;nonsense_mediated_decay;retained_intron	0.149656	0.429076	0.463847	0.88678	0.527668	0.864312	0.45752	-1.12809	0.0465205	1	down	yes
ENSMUSG00000032496	Ltf	ENSMUST00000035077;ENSMUST00000199313;ENSMUST00000199815;ENSMUST00000198884;ENSMUST00000198233;ENSMUST00000196209;ENSMUST00000197575;ENSMUST00000197893;ENSMUST00000200459;ENSMUST00000198152;ENSMUST00000196122;ENSMUST00000196777	GO:0001503(ossification);GO:0001530(lipopolysaccharide binding);GO:0001817(regulation of cytokine production);GO:0002227(innate immune response in mucosa);GO:0002376(immune system process);GO:0004252(serine-type endopeptidase activity);GO:0004869(cysteine-type endopeptidase inhibitor activity);GO:0005506(iron ion binding);GO:0005576(extracellular region);GO:0005615(extracellular space);GO:0005737…	NA	K17283	EC:3.4.21.-	lactotransferrin [Source:MGI Symbol;Acc:MGI:96837]	protein_coding;nonsense_mediated_decay;retained_intron	0.619342	0.429567	1.80788	2.76113	1.30438	2.03219	0.468502	-1.09387	0.0466328	1	down	yes
ENSMUSG00000087698	Gm13031	ENSMUST00000140501	NA	NA	NA	NA	predicted gene 13031 [Source:MGI Symbol;Acc:MGI:3702680]	antisense	1.2817	0.650362	0.070242	2.45043	1.60585	1.25636	0.376895	-1.40776	0.0469002	1	down	yes
ENSMUSG00000025644	Gm7628	ENSMUST00000134690	NA	NA	NA	NA	predicted gene 7628 [Source:MGI Symbol;Acc:MGI:3643956]	antisense	1.60069	2.64929	3.00418	1.63351	1.35868	0.619081	2.00876	1.0063	0.047075	1	up	yes
ENSMUSG00000014776	Nol3	ENSMUST00000014920	GO:0001666(response to hypoxia);GO:0001974(blood vessel remodeling);GO:0002931(response to ischemia);GO:0005102(signaling receptor binding);GO:0005123(death receptor binding);GO:0005509(calcium ion binding);GO:0005515(protein binding);GO:0005730(nucleolus);GO:0005737(cytoplasm);GO:0005739(mitochondrion);GO:0006376(mRNA splice site selection);GO:0006397(mRNA processing);GO:0010468(regulation of ge…	NA	NA	NA	nucleolar protein 3 (apoptosis repressor with CARD domain) [Source:MGI Symbol;Acc:MGI:1925938]	protein_coding	0.315957	0.772125	0.256861	0.228262	0.183984	0.182753	2.26041	1.17659	0.0473442	1	up	yes
ENSMUSG00000094242	Gm5456	ENSMUST00000170706	NA	NA	NA	NA	predicted gene 5456 [Source:MGI Symbol;Acc:MGI:3643775]	processed_pseudogene	0.810305	1.51894	1.21862	0.422868	0.505592	0.71701	2.15614	1.10845	0.0475465	1	up	yes
ENSMUSG00000022674	Ube2v2	ENSMUST00000115776;ENSMUST00000229859;ENSMUST00000115777;ENSMUST00000229244;ENSMUST00000118236;ENSMUST00000096234	GO:0000209(protein polyubiquitination);GO:0000729(DNA double-strand break processing);GO:0005515(protein binding);GO:0005634(nucleus);GO:0005654(nucleoplasm);GO:0006301(postreplication repair);GO:0010976(positive regulation of neuron projection development);GO:0031372(UBC13-MMS2 complex);GO:0032436(positive regulation of proteasomal ubiquitin-dependent protein catabolic process);GO:0042275(error-…	NA	K10704	NA	ubiquitin-conjugating enzyme E2 variant 2 [Source:MGI Symbol;Acc:MGI:1917870]	protein_coding;nonsense_mediated_decay;retained_intron	1.70789	0.525543	0.709587	0.178741	0.310758	0.827551	2.23455	1.15999	0.048039	1	up	yes
ENSMUSG00000097187	Gm19426	ENSMUST00000181711	NA	NA	NA	NA	predicted gene, 19426 [Source:MGI Symbol;Acc:MGI:5011611]	protein_coding	1.13074	0.931604	0.288554	1.27376	1.2847	2.77865	0.440481	-1.18285	0.048527	1	down	yes
ENSMUSG00000023994	Nfya	ENSMUST00000078800;ENSMUST00000046719;ENSMUST00000159535;ENSMUST00000161686;ENSMUST00000162460;ENSMUST00000160319;ENSMUST00000160804;ENSMUST00000163066;ENSMUST00000161117;ENSMUST00000159063;ENSMUST00000159237;ENSMUST00000161256;ENSMUST00000161603	GO:0000976(transcription regulatory region sequence-specific DNA binding);GO:0000978(RNA polymerase II cis-regulatory region sequence-specific DNA binding);GO:0001221(transcription cofactor binding);GO:0001228(DNA-binding transcription activator activity, RNA polymerase II-specific);GO:0003677(DNA binding);GO:0003700(DNA-binding transcription factor activity);GO:0005515(protein binding);GO:000563…	04612(Antigen processing and presentation);05152(Tuberculosis);05152(Tuberculosis)	K08064	NA	nuclear transcription factor-Y alpha [Source:MGI Symbol;Acc:MGI:97316]	protein_coding;retained_intron	7.53118	6.58211	6.00224	12.0055	10.2116	13.3382	0.565753	-0.821756	5.83616e-05	0.0254964	down	no
ENSMUSG00000018932	Map2k3	ENSMUST00000019076;ENSMUST00000145828;ENSMUST00000137609;ENSMUST00000126043;ENSMUST00000130269;ENSMUST00000137739	GO:0000165(MAPK cascade);GO:0000166(nucleotide binding);GO:0000187(activation of MAPK activity);GO:0004672(protein kinase activity);GO:0004674(protein serine/threonine kinase activity);GO:0004708(MAP kinase kinase activity);GO:0004713(protein tyrosine kinase activity);GO:0005515(protein binding);GO:0005524(ATP binding);GO:0005829(cytosol);GO:0006468(protein phosphorylation);GO:0006954(inflammator…	04010(MAPK signaling pathway);04015(Rap1 signaling pathway);04218(Cellular senescence);04620(Toll-like receptor signaling pathway);04664(Fc epsilon RI signaling pathway);04668(TNF signaling pathway);04714(Thermogenesis);04750(Inflammatory mediator regulation of TRP channels);04912(GnRH signaling pathway);05014(Amyotrophic lateral sclerosis (ALS));05145(Toxoplasmosis);05161(Hepatitis B);05164(Infl…	K04432	EC:2.7.12.2	mitogen-activated protein kinase kinase 3 [Source:MGI Symbol;Acc:MGI:1346868]	protein_coding;retained_intron;processed_transcript;nonsense_mediated_decay	14.1924	15.7652	16.4797	9.54633	8.16223	8.24238	1.78943	0.839498	0.000537298	0.151181	up	no
ENSMUSG00000027510	Rbm38	ENSMUST00000130430;ENSMUST00000173393;ENSMUST00000155512;ENSMUST00000173997;ENSMUST00000173878;ENSMUST00000173720;ENSMUST00000173979;ENSMUST00000029014	GO:0003676(nucleic acid binding);GO:0003723(RNA binding);GO:0003729(mRNA binding);GO:0003730(mRNA 3'-UTR binding);GO:0005634(nucleus);GO:0005737(cytoplasm);GO:0005829(cytosol);GO:0006397(mRNA processing);GO:0006977(DNA damage response, signal transduction by p53 class mediator resulting in cell cycle arrest);GO:0006978(DNA damage response, signal transduction by p53 class mediator resulting in tr…	NA	NA	NA	RNA binding motif protein 38 [Source:MGI Symbol;Acc:MGI:1889294]	retained_intron;protein_coding;nonsense_mediated_decay	4.7692	4.97532	4.87376	8.94921	12.3462	7.62682	0.505435	-0.984403	0.000786929	0.198961	down	no
ENSMUSG00000045193	Cirbp	ENSMUST00000105365;ENSMUST00000151321;ENSMUST00000140774;ENSMUST00000147190;ENSMUST00000054666;ENSMUST00000139935;ENSMUST00000154726	GO:0003676(nucleic acid binding);GO:0003723(RNA binding);GO:0003730(mRNA 3'-UTR binding);GO:0005634(nucleus);GO:0005654(nucleoplasm);GO:0005681(spliceosomal complex);GO:0005737(cytoplasm);GO:0008266(poly(U) RNA binding);GO:0009409(response to cold);GO:0009411(response to UV);GO:0010494(cytoplasmic stress granule);GO:0017148(negative regulation of translation);GO:0030308(negative regulation of cel…	NA	K13195	NA	cold inducible RNA binding protein [Source:MGI Symbol;Acc:MGI:893588]	protein_coding;retained_intron;nonsense_mediated_decay	34.4941	46.2678	34.3907	24.7329	17.7063	23.9778	1.73378	0.793922	0.000804561	0.198961	up	no
ENSMUSG00000072082	Ccnf	ENSMUST00000115390;ENSMUST00000234381;ENSMUST00000234949;ENSMUST00000234096;ENSMUST00000234541;ENSMUST00000234708;ENSMUST00000234916;ENSMUST00000235059;ENSMUST00000234491;ENSMUST00000234837	GO:0000079(regulation of cyclin-dependent protein serine/threonine kinase activity);GO:0000307(cyclin-dependent protein kinase holoenzyme complex);GO:0000320(re-entry into mitotic cell cycle);GO:0001890(placenta development);GO:0005515(protein binding);GO:0005634(nucleus);GO:0005737(cytoplasm);GO:0005813(centrosome);GO:0005814(centriole);GO:0005856(cytoskeleton);GO:0007049(cell cycle);GO:0010826(…	NA	K10289	NA	cyclin F [Source:MGI Symbol;Acc:MGI:102551]	protein_coding;retained_intron;nonsense_mediated_decay;processed_transcript	2.50801	2.64533	2.21307	4.16735	3.70526	5.88008	0.535635	-0.900679	0.00081365	0.198961	down	no
ENSMUSG00000021775	Nr1d2	ENSMUST00000090543;ENSMUST00000225308;ENSMUST00000143308;ENSMUST00000225491	GO:0000122(negative regulation of transcription by RNA polymerase II);GO:0000977(RNA polymerase II regulatory region sequence-specific DNA binding);GO:0000978(RNA polymerase II cis-regulatory region sequence-specific DNA binding);GO:0000987(cis-regulatory region sequence-specific DNA binding);GO:0001227(DNA-binding transcription repressor activity, RNA polymerase II-specific);GO:0003677(DNA bindi…	NA	K08531	NA	nuclear receptor subfamily 1, group D, member 2 [Source:MGI Symbol;Acc:MGI:2449205]	protein_coding;retained_intron	14.8487	21.7591	14.1075	8.46695	10.9272	10.1882	1.71438	0.777686	0.000878031	0.2024	up	no
ENSMUSG00000031167	Rbm3	ENSMUST00000115617;ENSMUST00000040010;ENSMUST00000115616;ENSMUST00000141629;ENSMUST00000129947;ENSMUST00000155599;ENSMUST00000145450;ENSMUST00000115615;ENSMUST00000115621;ENSMUST00000141925;ENSMUST00000115619	GO:0003676(nucleic acid binding);GO:0003723(RNA binding);GO:0005634(nucleus);GO:0005654(nucleoplasm);GO:0005681(spliceosomal complex);GO:0005737(cytoplasm);GO:0006412(translation);GO:0006417(regulation of translation);GO:0009409(response to cold);GO:0015934(large ribosomal subunit);GO:0030425(dendrite);GO:0035196(production of miRNAs involved in gene silencing by miRNA);GO:0042995(cell projection…	NA	K13186	NA	RNA binding motif (RNP1, RRM) protein 3 [Source:MGI Symbol;Acc:MGI:1099460]	protein_coding;nonsense_mediated_decay;processed_transcript;retained_intron	40.0048	63.9781	57.8918	32.3401	27.8717	31.4259	1.76646	0.820862	0.000879922	0.2024	up	no
ENSMUSG00000029390	Tmed2	ENSMUST00000060226;ENSMUST00000124529;ENSMUST00000200031;ENSMUST00000135464;ENSMUST00000197112	GO:0001701(in utero embryonic development);GO:0001756(somitogenesis);GO:0001843(neural tube closure);GO:0001892(embryonic placenta development);GO:0001893(maternal placenta development);GO:0001947(heart looping);GO:0003674(molecular_function);GO:0005783(endoplasmic reticulum);GO:0005789(endoplasmic reticulum membrane);GO:0005793(endoplasmic reticulum-Golgi intermediate compartment);GO:0005794(Gol…	NA	K20347	NA	transmembrane p24 trafficking protein 2 [Source:MGI Symbol;Acc:MGI:1929269]	protein_coding;nonsense_mediated_decay;retained_intron	44.0572	42.8087	45.4045	106.287	106.795	45.884	0.510763	-0.969274	0.000890017	0.2024	down	no
ENSMUSG00000028035	Dnajb4	ENSMUST00000050073;ENSMUST00000144950;ENSMUST00000196291;ENSMUST00000029669;ENSMUST00000197941;ENSMUST00000134701;ENSMUST00000153355	GO:0001671(ATPase activator activity);GO:0005654(nucleoplasm);GO:0005737(cytoplasm);GO:0005829(cytosol);GO:0005886(plasma membrane);GO:0006457(protein folding);GO:0016020(membrane);GO:0032781(positive regulation of ATPase activity);GO:0051082(unfolded protein binding);GO:0051085(chaperone cofactor-dependent protein refolding);GO:0051087(chaperone binding);GO:0051087(chaperone binding)	NA	K09510	NA	DnaJ heat shock protein family (Hsp40) member B4 [Source:MGI Symbol;Acc:MGI:1914285]	protein_coding;retained_intron;processed_transcript	2.12367	2.29344	2.02538	3.25919	3.68907	4.72821	0.55175	-0.857912	0.000973497	0.212645	down	no
ENSMUSG00000035262	Amh	ENSMUST00000036016	GO:0001546(preantral ovarian follicle growth);GO:0001655(urogenital system development);GO:0001880(Mullerian duct regression);GO:0005102(signaling receptor binding);GO:0005160(transforming growth factor beta receptor binding);GO:0005576(extracellular region);GO:0005615(extracellular space);GO:0007165(signal transduction);GO:0007506(gonadal mesoderm development);GO:0007568(aging);GO:0008083(growth…	04024(cAMP signaling pathway);04060(Cytokine-cytokine receptor interaction);04350(TGF-beta signaling pathway);04390(Hippo signaling pathway)	K04665	NA	anti-Mullerian hormone [Source:MGI Symbol;Acc:MGI:88006]	protein_coding	153.093	122.145	81.8756	153.739	240.189	248.796	0.555625	-0.847816	0.00111537	0.228596	down	no
ENSMUSG00000034807	Colgalt1	ENSMUST00000212706;ENSMUST00000047903;ENSMUST00000212216	GO:0005783(endoplasmic reticulum);GO:0005788(endoplasmic reticulum lumen);GO:0016740(transferase activity);GO:0016757(transferase activity, transferring glycosyl groups);GO:0050211(procollagen galactosyltransferase activity);GO:1904028(positive regulation of collagen fibril organization);GO:1904028(positive regulation of collagen fibril organization)	00310(Lysine degradation);00514(Other types of O-glycan biosynthesis);00514(Other types of O-glycan biosynthesis)	K11703	EC:2.4.1.50	collagen beta(1-O)galactosyltransferase 1 [Source:MGI Symbol;Acc:MGI:1924348]	retained_intron;protein_coding	15.8261	18.3699	17.1622	17.8659	36.2498	40.0828	0.545212	-0.87511	0.0011452	0.231847	down	no
ENSMUSG00000019942	Cdk1	ENSMUST00000020099;ENSMUST00000129444;ENSMUST00000124054;ENSMUST00000152448;ENSMUST00000119827;ENSMUST00000149474;ENSMUST00000123458	GO:0000086(G2/M transition of mitotic cell cycle);GO:0000166(nucleotide binding);GO:0000278(mitotic cell cycle);GO:0000307(cyclin-dependent protein kinase holoenzyme complex);GO:0003682(chromatin binding);GO:0004672(protein kinase activity);GO:0004674(protein serine/threonine kinase activity);GO:0004693(cyclin-dependent protein serine/threonine kinase activity);GO:0005515(protein binding);GO:0005…	04110(Cell cycle);04114(Oocyte meiosis);04115(p53 signaling pathway);04218(Cellular senescence);04540(Gap junction);04914(Progesterone-mediated oocyte maturation);05170(Human immunodeficiency virus 1 infection);05203(Viral carcinogenesis);05203(Viral carcinogenesis)	K02087	2.7.11.23;EC:2.7.11.22	cyclin-dependent kinase 1 [Source:MGI Symbol;Acc:MGI:88351]	protein_coding;retained_intron	8.602	7.91925	7.69457	12.1204	10.8104	16.1915	0.618977	-0.692043	0.00153172	0.270512	down	no
ENSMUSG00000025408	Ddit3	ENSMUST00000026475;ENSMUST00000134686;ENSMUST00000139091	GO:0000122(negative regulation of transcription by RNA polymerase II);GO:0000976(transcription regulatory region sequence-specific DNA binding);GO:0000978(RNA polymerase II cis-regulatory region sequence-specific DNA binding);GO:0001228(DNA-binding transcription activator activity, RNA polymerase II-specific);GO:0001955(blood vessel maturation);GO:0003677(DNA binding);GO:0003700(DNA-binding trans…	04010(MAPK signaling pathway);04141(Protein processing in endoplasmic reticulum);04210(Apoptosis);04932(Non-alcoholic fatty liver disease (NAFLD));05202(Transcriptional misregulation in cancer);05202(Transcriptional misregulation in cancer)	K04452	NA	DNA-damage inducible transcript 3 [Source:MGI Symbol;Acc:MGI:109247]	protein_coding;retained_intron	32.7661	20.5835	26.256	15.9348	15.4716	10.4744	1.90076	0.92658	0.00162897	0.284659	up	no
ENSMUSG00000027496	Aurka	ENSMUST00000109139;ENSMUST00000028997;ENSMUST00000109140;ENSMUST00000128004;ENSMUST00000126107	GO:0000166(nucleotide binding);GO:0000212(meiotic spindle organization);GO:0000226(microtubule cytoskeleton organization);GO:0000278(mitotic cell cycle);GO:0000780(condensed nuclear chromosome, centromeric region);GO:0000922(spindle pole);GO:0004672(protein kinase activity);GO:0004674(protein serine/threonine kinase activity);GO:0005515(protein binding);GO:0005524(ATP binding);GO:0005634(nucleus)…	04114(Oocyte meiosis);04914(Progesterone-mediated oocyte maturation);04914(Progesterone-mediated oocyte maturation)	K11481	EC:2.7.11.1	aurora kinase A [Source:MGI Symbol;Acc:MGI:894678]	protein_coding;retained_intron	7.47434	8.16085	7.35781	12.7669	10.9779	16.452	0.572012	-0.805883	0.00211481	0.346892	down	no
ENSMUSG00000003779	Kif20a	ENSMUST00000237407;ENSMUST00000166044;ENSMUST00000235174;ENSMUST00000237481;ENSMUST00000236114;ENSMUST00000167161	GO:0000166(nucleotide binding);GO:0000281(mitotic cytokinesis);GO:0001578(microtubule bundle formation);GO:0003774(motor activity);GO:0003777(microtubule motor activity);GO:0005524(ATP binding);GO:0005634(nucleus);GO:0005654(nucleoplasm);GO:0005737(cytoplasm);GO:0005794(Golgi apparatus);GO:0005819(spindle);GO:0005856(cytoskeleton);GO:0005871(kinesin complex);GO:0005874(microtubule);GO:0007018(mic…	NA	K10402	NA	kinesin family member 20A [Source:MGI Symbol;Acc:MGI:1201682]	protein_coding;retained_intron;nonsense_mediated_decay	6.175	5.32216	5.11493	8.73874	7.83808	11.5327	0.590978	-0.758824	0.00246117	0.380557	down	no
ENSMUSG00000001403	Ube2c	ENSMUST00000088248;ENSMUST00000001439	GO:0000151(ubiquitin ligase complex);GO:0000166(nucleotide binding);GO:0000209(protein polyubiquitination);GO:0004842(ubiquitin-protein transferase activity);GO:0005524(ATP binding);GO:0005634(nucleus);GO:0005680(anaphase-promoting complex);GO:0005829(cytosol);GO:0005886(plasma membrane);GO:0006511(ubiquitin-dependent protein catabolic process);GO:0007049(cell cycle);GO:0010458(exit from mitosis)…	04120(Ubiquitin mediated proteolysis);04120(Ubiquitin mediated proteolysis)	K06688	EC:2.3.2.23	ubiquitin-conjugating enzyme E2C [Source:MGI Symbol;Acc:MGI:1915862]	protein_coding	17.0085	13.6824	14.5612	21.5594	19.5769	33.3756	0.607314	-0.719486	0.00265629	0.400883	down	no
ENSMUSG00000006398	Cdc20	ENSMUST00000006565;ENSMUST00000151302;ENSMUST00000183942	GO:0000922(spindle pole);GO:0005515(protein binding);GO:0005654(nucleoplasm);GO:0005680(anaphase-promoting complex);GO:0005737(cytoplasm);GO:0005813(centrosome);GO:0005815(microtubule organizing center);GO:0005829(cytosol);GO:0005856(cytoskeleton);GO:0007049(cell cycle);GO:0007064(mitotic sister chromatid cohesion);GO:0007399(nervous system development);GO:0008022(protein C-terminus binding);GO:0…	04110(Cell cycle);04114(Oocyte meiosis);04120(Ubiquitin mediated proteolysis);05166(Human T-cell leukemia virus 1 infection);05203(Viral carcinogenesis);05203(Viral carcinogenesis)	K03363	NA	cell division cycle 20 [Source:MGI Symbol;Acc:MGI:1859866]	protein_coding;retained_intron;nonsense_mediated_decay	18.179	17.9645	15.3162	24.4378	23.6953	34.9057	0.619707	-0.690342	0.00283982	0.417202	down	no
ENSMUSG00000021870	Slmap	ENSMUST00000112330;ENSMUST00000102956;ENSMUST00000136625;ENSMUST00000139075;ENSMUST00000136635;ENSMUST00000038522;ENSMUST00000146438;ENSMUST00000129920;ENSMUST00000144737;ENSMUST00000134117;ENSMUST00000127078;ENSMUST00000145738;ENSMUST00000112331;ENSMUST00000125437;ENSMUST00000090359;ENSMUST00000142679	GO:0005515(protein binding);GO:0005615(extracellular space);GO:0005737(cytoplasm);GO:0005815(microtubule organizing center);GO:0005856(cytoskeleton);GO:0005886(plasma membrane);GO:0006936(muscle contraction);GO:0016020(membrane);GO:0016021(integral component of membrane);GO:0030018(Z disc);GO:0031430(M band);GO:0042383(sarcolemma);GO:0072659(protein localization to plasma membrane);GO:1900825(reg…	NA	NA	NA	sarcolemma associated protein [Source:MGI Symbol;Acc:MGI:1933549]	protein_coding;retained_intron;processed_transcript	9.57113	7.56371	5.87782	4.05607	3.58831	5.75027	1.71805	0.780772	0.00291139	0.423965	up	no
ENSMUSG00000039536	Stau1	ENSMUST00000109236;ENSMUST00000109238;ENSMUST00000142481;ENSMUST00000109235;ENSMUST00000049412;ENSMUST00000184390;ENSMUST00000134664;ENSMUST00000130790;ENSMUST00000149454;ENSMUST00000154506;ENSMUST00000130104	GO:0003723(RNA binding);GO:0003725(double-stranded RNA binding);GO:0005515(protein binding);GO:0005737(cytoplasm);GO:0005783(endoplasmic reticulum);GO:0005791(rough endoplasmic reticulum);GO:0005829(cytosol);GO:0005886(plasma membrane);GO:0008157(protein phosphatase 1 binding);GO:0008298(intracellular mRNA localization);GO:0010494(cytoplasmic stress granule);GO:0030425(dendrite);GO:0034599(cellul…	NA	K17597	NA	staufen double-stranded RNA binding protein 1 [Source:MGI Symbol;Acc:MGI:1338864]	protein_coding;retained_intron;nonsense_mediated_decay;processed_transcript	13.0579	12.5548	9.89354	17.6625	17.5512	18.5259	0.660707	-0.597918	0.00316399	0.448935	down	no
ENSMUSG00000034906	Ncaph	ENSMUST00000110387;ENSMUST00000152806;ENSMUST00000156625;ENSMUST00000146142;ENSMUST00000175885;ENSMUST00000177191	GO:0000796(condensin complex);GO:0000799(nuclear condensin complex);GO:0003682(chromatin binding);GO:0005634(nucleus);GO:0005654(nucleoplasm);GO:0005694(chromosome);GO:0005737(cytoplasm);GO:0005829(cytosol);GO:0007049(cell cycle);GO:0007076(mitotic chromosome condensation);GO:0007143(female meiotic nuclear division);GO:0010032(meiotic chromosome condensation);GO:0030261(chromosome condensation);G…	NA	K06676	NA	non-SMC condensin I complex, subunit H [Source:MGI Symbol;Acc:MGI:2444777]	protein_coding;retained_intron;processed_transcript;nonsense_mediated_decay	6.10093	5.37041	5.96546	9.54246	7.77747	11.9181	0.596374	-0.74571	0.00325934	0.458545	down	no
ENSMUSG00000027469	Tpx2	ENSMUST00000178997;ENSMUST00000164120;ENSMUST00000109816;ENSMUST00000028969;ENSMUST00000144848;ENSMUST00000143740;ENSMUST00000136407	GO:0000922(spindle pole);GO:0005515(protein binding);GO:0005634(nucleus);GO:0005654(nucleoplasm);GO:0005737(cytoplasm);GO:0005818(aster);GO:0005819(spindle);GO:0005856(cytoskeleton);GO:0005874(microtubule);GO:0005876(spindle microtubule);GO:0006915(apoptotic process);GO:0007020(microtubule nucleation);GO:0007026(negative regulation of microtubule depolymerization);GO:0007049(cell cycle);GO:001563…	NA	K16812	NA	TPX2, microtubule-associated [Source:MGI Symbol;Acc:MGI:1919369]	protein_coding;retained_intron;processed_transcript	11.1328	8.5075	9.33312	14.8168	11.7707	20.2019	0.61923	-0.691453	0.00356863	0.473943	down	no
ENSMUSG00000006585	Cdt1	ENSMUST00000006760;ENSMUST00000212967;ENSMUST00000212821;ENSMUST00000212201;ENSMUST00000212053	GO:0000076(DNA replication checkpoint);GO:0000278(mitotic cell cycle);GO:0000775(chromosome, centromeric region);GO:0000776(kinetochore);GO:0000777(condensed chromosome kinetochore);GO:0003677(DNA binding);GO:0003682(chromatin binding);GO:0005515(protein binding);GO:0005634(nucleus);GO:0005654(nucleoplasm);GO:0005694(chromosome);GO:0006260(DNA replication);GO:0007049(cell cycle);GO:0007059(chromo…	NA	K10727	NA	chromatin licensing and DNA replication factor 1 [Source:MGI Symbol;Acc:MGI:1914427]	protein_coding;retained_intron;processed_transcript	3.77453	4.51273	3.56766	6.6699	7.94042	6.49395	0.561731	-0.83205	0.00368103	0.481172	down	no
ENSMUSG00000040084	Bub1b	ENSMUST00000038341;ENSMUST00000126013;ENSMUST00000130512;ENSMUST00000127356	GO:0000166(nucleotide binding);GO:0000775(chromosome, centromeric region);GO:0000776(kinetochore);GO:0000777(condensed chromosome kinetochore);GO:0000778(condensed nuclear chromosome kinetochore);GO:0000940(condensed chromosome outer kinetochore);GO:0004672(protein kinase activity);GO:0004674(protein serine/threonine kinase activity);GO:0005515(protein binding);GO:0005524(ATP binding);GO:0005634(…	04110(Cell cycle);05166(Human T-cell leukemia virus 1 infection);05166(Human T-cell leukemia virus 1 infection)	K06637	EC:2.7.11.1	BUB1B, mitotic checkpoint serine/threonine kinase [Source:MGI Symbol;Acc:MGI:1333889]	protein_coding;retained_intron	14.7457	13.0009	12.6757	19.2073	17.3758	24.2483	0.664497	-0.589666	0.00382255	0.486089	down	no
ENSMUSG00000030867	Plk1	ENSMUST00000033154;ENSMUST00000205901;ENSMUST00000206470	GO:0000070(mitotic sister chromatid segregation);GO:0000086(G2/M transition of mitotic cell cycle);GO:0000122(negative regulation of transcription by RNA polymerase II);GO:0000132(establishment of mitotic spindle orientation);GO:0000166(nucleotide binding);GO:0000278(mitotic cell cycle);GO:0000281(mitotic cytokinesis);GO:0000287(magnesium ion binding);GO:0000775(chromosome, centromeric region);GO…	04068(FoxO signaling pathway);04110(Cell cycle);04114(Oocyte meiosis);04914(Progesterone-mediated oocyte maturation);04914(Progesterone-mediated oocyte maturation)	K06631	EC:2.7.11.21	polo like kinase 1 [Source:MGI Symbol;Acc:MGI:97621]	protein_coding;nonsense_mediated_decay	13.8853	13.1441	13.3828	19.7102	17.0592	30.307	0.602478	-0.731019	0.00404371	0.500967	down	no
ENSMUSG00000031586	Rbpms	ENSMUST00000033994;ENSMUST00000053251;ENSMUST00000033995;ENSMUST00000191473;ENSMUST00000182987;ENSMUST00000183122;ENSMUST00000183336;ENSMUST00000231786;ENSMUST00000183088;ENSMUST00000182926;ENSMUST00000231942;ENSMUST00000182184;ENSMUST00000182256;ENSMUST00000182871;ENSMUST00000183062	GO:0000932(P-body);GO:0003676(nucleic acid binding);GO:0003713(transcription coactivator activity);GO:0003723(RNA binding);GO:0003729(mRNA binding);GO:0005634(nucleus);GO:0005654(nucleoplasm);GO:0005737(cytoplasm);GO:0005829(cytosol);GO:0006979(response to oxidative stress);GO:0008143(poly(A) binding);GO:0010494(cytoplasmic stress granule);GO:0010862(positive regulation of pathway-restricted SMAD…	NA	NA	NA	RNA binding protein gene with multiple splicing [Source:MGI Symbol;Acc:MGI:1334446]	protein_coding;nonsense_mediated_decay;retained_intron;processed_transcript	10.2468	8.01502	7.5944	12.9379	11.2522	14.5732	0.667027	-0.584182	0.00427978	0.522416	down	no
ENSMUSG00000030987	Stim1	ENSMUST00000033289;ENSMUST00000209255;ENSMUST00000211058;ENSMUST00000210834;ENSMUST00000210544;ENSMUST00000211457;ENSMUST00000211141;ENSMUST00000210761;ENSMUST00000210266	GO:0002020(protease binding);GO:0002115(store-operated calcium entry);GO:0005246(calcium channel regulator activity);GO:0005509(calcium ion binding);GO:0005513(detection of calcium ion);GO:0005515(protein binding);GO:0005737(cytoplasm);GO:0005783(endoplasmic reticulum);GO:0005789(endoplasmic reticulum membrane);GO:0005856(cytoskeleton);GO:0005874(microtubule);GO:0005886(plasma membrane);GO:000588…	04020(Calcium signaling pathway);04611(Platelet activation);04611(Platelet activation)	NA	NA	stromal interaction molecule 1 [Source:MGI Symbol;Acc:MGI:107476]	protein_coding;retained_intron	3.2736	2.11317	2.47084	4.76575	3.31153	5.23856	0.590095	-0.760981	0.00452535	0.54836	down	no
ENSMUSG00000032327	Stra6	ENSMUST00000167479;ENSMUST00000170397;ENSMUST00000145886;ENSMUST00000128378;ENSMUST00000136338;ENSMUST00000085677;ENSMUST00000134955;ENSMUST00000128021;ENSMUST00000150820;ENSMUST00000136154;ENSMUST00000034880;ENSMUST00000134450;ENSMUST00000133287;ENSMUST00000147134	GO:0001568(blood vessel development);GO:0001822(kidney development);GO:0003184(pulmonary valve morphogenesis);GO:0003281(ventricular septum development);GO:0005886(plasma membrane);GO:0005887(integral component of plasma membrane);GO:0007507(heart development);GO:0007612(learning);GO:0007631(feeding behavior);GO:0016020(membrane);GO:0016021(integral component of membrane);GO:0016918(retinal bindi…	NA	K23088	NA	stimulated by retinoic acid gene 6 [Source:MGI Symbol;Acc:MGI:107742]	protein_coding;retained_intron	3.22298	3.75031	4.44093	4.75691	9.73866	6.02644	0.556194	-0.846339	0.00480763	0.574932	down	no
ENSMUSG00000056608	Chd9	ENSMUST00000209474;ENSMUST00000210947;ENSMUST00000048665;ENSMUST00000209203;ENSMUST00000211215;ENSMUST00000209423;ENSMUST00000211552;ENSMUST00000109614;ENSMUST00000211795;ENSMUST00000209746;ENSMUST00000211034;ENSMUST00000211403;ENSMUST00000209341;ENSMUST00000209531;ENSMUST00000210887	GO:0000166(nucleotide binding);GO:0003677(DNA binding);GO:0003678(DNA helicase activity);GO:0004386(helicase activity);GO:0005515(protein binding);GO:0005524(ATP binding);GO:0005634(nucleus);GO:0005737(cytoplasm);GO:0006325(chromatin organization);GO:0008150(biological_process);GO:0016787(hydrolase activity);GO:0016817(hydrolase activity, acting on acid anhydrides);GO:0032508(DNA duplex unwinding…	NA	K14438	EC:3.6.4.12	chromodomain helicase DNA binding protein 9 [Source:MGI Symbol;Acc:MGI:1924001]	processed_transcript;protein_coding;nonsense_mediated_decay;retained_intron	5.21701	4.98872	3.08248	2.69695	2.96191	2.51058	1.62657	0.701835	0.00484025	0.574932	up	no
ENSMUSG00000041775	Mapk1ip1	ENSMUST00000075667;ENSMUST00000118810;ENSMUST00000119664	GO:0005575(cellular_component);GO:0005737(cytoplasm);GO:0005819(spindle);GO:0005856(cytoskeleton);GO:0007275(multicellular organism development);GO:0008150(biological_process);GO:0042802(identical protein binding);GO:0051321(meiotic cell cycle);GO:0051321(meiotic cell cycle)	NA	NA	NA	mitogen-activated protein kinase 1 interacting protein 1 [Source:MGI Symbol;Acc:MGI:1916796]	protein_coding	8.41595	7.30353	7.43505	18.8501	7.35631	19.5673	0.505849	-0.983223	0.0048651	0.574932	down	no
ENSMUSG00000064356	mt-Atp8	ENSMUST00000082407	GO:0000276(mitochondrial proton-transporting ATP synthase complex, coupling factor F(o));GO:0005739(mitochondrion);GO:0005753(mitochondrial proton-transporting ATP synthase complex);GO:0006754(ATP biosynthetic process);GO:0006811(ion transport);GO:0015078(proton transmembrane transporter activity);GO:0015986(ATP synthesis coupled proton transport);GO:0016020(membrane);GO:0016021(integral componen…	00190(Oxidative phosphorylation);04714(Thermogenesis);05010(Alzheimer disease);05012(Parkinson disease);05016(Huntington disease)	K02125	NA	mitochondrially encoded ATP synthase 8 [Source:MGI Symbol;Acc:MGI:99926]	protein_coding	2396.48	2944.37	2704.26	1649.79	1765.28	1796.39	1.54373	0.626421	0.00536361	0.609749	up	no
ENSMUSG00000035683	Melk	ENSMUST00000045607;ENSMUST00000137759;ENSMUST00000125708;ENSMUST00000137703	GO:0000166(nucleotide binding);GO:0004672(protein kinase activity);GO:0004674(protein serine/threonine kinase activity);GO:0004715(non-membrane spanning protein tyrosine kinase activity);GO:0005509(calcium ion binding);GO:0005515(protein binding);GO:0005524(ATP binding);GO:0005634(nucleus);GO:0005737(cytoplasm);GO:0005886(plasma membrane);GO:0005938(cell cortex);GO:0006468(protein phosphorylation…	NA	K08799	EC:2.7.11.1	maternal embryonic leucine zipper kinase [Source:MGI Symbol;Acc:MGI:106924]	protein_coding;processed_transcript	5.29657	3.83387	3.91319	6.91638	6.42799	10.0107	0.558492	-0.840392	0.00543106	0.609749	down	no
ENSMUSG00000021453	Gadd45g	ENSMUST00000132480;ENSMUST00000021903	GO:0000185(activation of MAPKKK activity);GO:0005634(nucleus);GO:0005737(cytoplasm);GO:0043065(positive regulation of apoptotic process);GO:0046330(positive regulation of JNK cascade);GO:0051726(regulation of cell cycle);GO:1900745(positive regulation of p38MAPK cascade);GO:1900745(positive regulation of p38MAPK cascade)	04010(MAPK signaling pathway);04068(FoxO signaling pathway);04110(Cell cycle);04115(p53 signaling pathway);04210(Apoptosis);04218(Cellular senescence);05169(Epstein-Barr virus infection);05200(Pathways in cancer);05202(Transcriptional misregulation in cancer);05210(Colorectal cancer);05212(Pancreatic cancer);05213(Endometrial cancer);05214(Glioma);05216(Thyroid cancer);05217(Basal cell carcinoma)…	K04402	NA	growth arrest and DNA-damage-inducible 45 gamma [Source:MGI Symbol;Acc:MGI:1346325]	retained_intron;protein_coding	16.9543	20.1207	17.5786	17.8818	47.2705	35.5225	0.542872	-0.881315	0.00549813	0.609749	down	no
ENSMUSG00000063253	Scoc	ENSMUST00000212905;ENSMUST00000167525;ENSMUST00000212031;ENSMUST00000212500;ENSMUST00000081506;ENSMUST00000212947;ENSMUST00000212473;ENSMUST00000212449;ENSMUST00000212849;ENSMUST00000212871	GO:0000139(Golgi membrane);GO:0003674(molecular_function);GO:0005654(nucleoplasm);GO:0005737(cytoplasm);GO:0005768(endosome);GO:0005794(Golgi apparatus);GO:0005802(trans-Golgi network);GO:0005829(cytosol);GO:0016020(membrane);GO:0016239(positive regulation of macroautophagy);GO:0061635(regulation of protein complex stability);GO:0061635(regulation of protein complex stability)	NA	K20316	NA	short coiled-coil protein [Source:MGI Symbol;Acc:MGI:1927654]	protein_coding;retained_intron;processed_transcript	5.12066	4.79215	4.70271	3.52327	1.79594	2.00366	1.99587	0.997021	0.00550945	0.609749	up	no
ENSMUSG00000047248	C2cd3	ENSMUST00000098259;ENSMUST00000051777;ENSMUST00000119647;ENSMUST00000156559;ENSMUST00000184657;ENSMUST00000185051;ENSMUST00000208753;ENSMUST00000208018;ENSMUST00000151573;ENSMUST00000133464;ENSMUST00000185084;ENSMUST00000184779;ENSMUST00000184753;ENSMUST00000120196	GO:0001701(in utero embryonic development);GO:0001947(heart looping);GO:0005515(protein binding);GO:0005737(cytoplasm);GO:0005813(centrosome);GO:0005814(centriole);GO:0005856(cytoskeleton);GO:0005929(cilium);GO:0007389(pattern specification process);GO:0007420(brain development);GO:0008589(regulation of smoothened signaling pathway);GO:0016485(protein processing);GO:0021915(neural tube developmen…	NA	K16751	NA	C2 calcium-dependent domain containing 3 [Source:MGI Symbol;Acc:MGI:2142166]	protein_coding;retained_intron;processed_transcript;nonsense_mediated_decay	4.40765	3.39577	3.69324	5.40218	5.75275	5.95819	0.671804	-0.573888	0.00563496	0.613302	down	no
ENSMUSG00000049932	H2ax	ENSMUST00000052686	GO:0000724(double-strand break repair via homologous recombination);GO:0000781(chromosome, telomeric region);GO:0000785(chromatin);GO:0000786(nucleosome);GO:0000790(nuclear chromatin);GO:0000794(condensed nuclear chromosome);GO:0001673(male germ cell nucleus);GO:0001741(XY body);GO:0003677(DNA binding);GO:0003684(damaged DNA binding);GO:0005515(protein binding);GO:0005634(nucleus);GO:0005654(nucl…	04217(Necroptosis);05034(Alcoholism);05322(Systemic lupus erythematosus)	K11251	NA	H2A.X variant histone [Source:MGI Symbol;Acc:MGI:102688]	protein_coding	38.2966	33.7234	32.4311	50.2742	45.0745	60.1997	0.671502	-0.574537	0.00564521	0.613302	down	no
ENSMUSG00000005410	Mcm5	ENSMUST00000212426;ENSMUST00000164309;ENSMUST00000212811;ENSMUST00000211912;ENSMUST00000212648	GO:0000166(nucleotide binding);GO:0000727(double-strand break repair via break-induced replication);GO:0003677(DNA binding);GO:0003678(DNA helicase activity);GO:0003688(DNA replication origin binding);GO:0003697(single-stranded DNA binding);GO:0004386(helicase activity);GO:0005524(ATP binding);GO:0005634(nucleus);GO:0005654(nucleoplasm);GO:0005737(cytoplasm);GO:0005829(cytosol);GO:0006260(DNA rep…	03030(DNA replication);04110(Cell cycle);04110(Cell cycle)	K02209	EC:3.6.4.12	minichromosome maintenance complex component 5 [Source:MGI Symbol;Acc:MGI:103197]	protein_coding;retained_intron	13.9338	11.0661	13.6921	16.1507	18.4217	24.7374	0.652371	-0.616236	0.00572887	0.615699	down	no
ENSMUSG00000042202	Slc35e2	ENSMUST00000105608;ENSMUST00000118607;ENSMUST00000043829;ENSMUST00000151425	GO:0001835(blastocyst hatching);GO:0005794(Golgi apparatus);GO:0015297(antiporter activity);GO:0016020(membrane);GO:0016021(integral component of membrane);GO:0022857(transmembrane transporter activity);GO:0055085(transmembrane transport);GO:0055085(transmembrane transport)	NA	K15284	NA	solute carrier family 35, member E2 [Source:MGI Symbol;Acc:MGI:2444240]	protein_coding;processed_transcript	6.33863	7.42839	10.1077	3.75782	3.28113	6.41055	1.77513	0.827928	0.00574865	0.615699	up	no
ENSMUSG00000026411	Tmem9	ENSMUST00000063719;ENSMUST00000117950;ENSMUST00000118832;ENSMUST00000165125;ENSMUST00000140545	GO:0003674(molecular_function);GO:0005764(lysosome);GO:0005765(lysosomal membrane);GO:0005768(endosome);GO:0005770(late endosome);GO:0008150(biological_process);GO:0016020(membrane);GO:0016021(integral component of membrane);GO:0031902(late endosome membrane);GO:0090263(positive regulation of canonical Wnt signaling pathway);GO:0090263(positive regulation of canonical Wnt signaling pathway)	NA	NA	NA	transmembrane protein 9 [Source:MGI Symbol;Acc:MGI:1913491]	protein_coding;retained_intron;processed_transcript	13.0895	12.2723	11.2273	15.5384	31.5125	15.3853	0.586022	-0.770972	0.00585783	0.619401	down	no
ENSMUSG00000031170	Slc38a5	ENSMUST00000115590;ENSMUST00000033512;ENSMUST00000115591;ENSMUST00000127103	GO:0003333(amino acid transmembrane transport);GO:0005290(L-histidine transmembrane transporter activity);GO:0005886(plasma membrane);GO:0005887(integral component of plasma membrane);GO:0006868(glutamine transport);GO:0015171(amino acid transmembrane transporter activity);GO:0015175(neutral amino acid transmembrane transporter activity);GO:0015182(L-asparagine transmembrane transporter activity)…	04727(GABAergic synapse);04727(GABAergic synapse)	K14992	NA	solute carrier family 38, member 5 [Source:MGI Symbol;Acc:MGI:2148066]	protein_coding	36.1651	41.3948	25.3243	33.9246	63.4834	76.622	0.591187	-0.758314	0.00611746	0.638905	down	no
ENSMUSG00000038252	Ncapd2	ENSMUST00000191080;ENSMUST00000043848;ENSMUST00000188119;ENSMUST00000186561;ENSMUST00000189706;ENSMUST00000185624;ENSMUST00000188762;ENSMUST00000188306;ENSMUST00000188665;ENSMUST00000186210;ENSMUST00000188410;ENSMUST00000186667;ENSMUST00000189959	GO:0000228(nuclear chromosome);GO:0000278(mitotic cell cycle);GO:0000793(condensed chromosome);GO:0000796(condensin complex);GO:0005634(nucleus);GO:0005654(nucleoplasm);GO:0005694(chromosome);GO:0005737(cytoplasm);GO:0005829(cytosol);GO:0007049(cell cycle);GO:0007076(mitotic chromosome condensation);GO:0030261(chromosome condensation);GO:0042393(histone binding);GO:0051301(cell division);GO:00513…	NA	K06677	NA	non-SMC condensin I complex, subunit D2 [Source:MGI Symbol;Acc:MGI:1915548]	retained_intron;protein_coding;nonsense_mediated_decay	15.3795	12.1702	12.4162	18.0698	17.5486	24.807	0.66141	-0.596383	0.00611926	0.638905	down	no
ENSMUSG00000024660	Incenp	ENSMUST00000025562;ENSMUST00000238129;ENSMUST00000235358;ENSMUST00000236533;ENSMUST00000237655;ENSMUST00000237147;ENSMUST00000237439;ENSMUST00000238004;ENSMUST00000237725	GO:0000070(mitotic sister chromatid segregation);GO:0000281(mitotic cytokinesis);GO:0000775(chromosome, centromeric region);GO:0000776(kinetochore);GO:0000777(condensed chromosome kinetochore);GO:0000793(condensed chromosome);GO:0000795(synaptonemal complex);GO:0000800(lateral element);GO:0000801(central element);GO:0005634(nucleus);GO:0005654(nucleoplasm);GO:0005694(chromosome);GO:0005721(perice…	NA	K11515	NA	inner centromere protein [Source:MGI Symbol;Acc:MGI:1313288]	protein_coding;retained_intron	11.1959	9.93755	9.73296	14.3977	13.37	18.0873	0.673131	-0.57104	0.00636987	0.652754	down	no
ENSMUSG00000028957	Per3	ENSMUST00000103204;ENSMUST00000128283;ENSMUST00000138584;ENSMUST00000138052;ENSMUST00000136398	GO:0000122(negative regulation of transcription by RNA polymerase II);GO:0000976(transcription regulatory region sequence-specific DNA binding);GO:0001222(transcription corepressor binding);GO:0005515(protein binding);GO:0005634(nucleus);GO:0005737(cytoplasm);GO:0007623(circadian rhythm);GO:0008134(transcription factor binding);GO:0009416(response to light stimulus);GO:0019900(kinase binding);GO:…	04710(Circadian rhythm);04713(Circadian entrainment);04713(Circadian entrainment)	K21945	NA	period circadian clock 3 [Source:MGI Symbol;Acc:MGI:1277134]	protein_coding;retained_intron;processed_transcript;nonsense_mediated_decay	4.45786	7.75433	5.19744	3.8439	3.74541	2.66676	1.69749	0.763407	0.00659835	0.67202	up	no
ENSMUSG00000049800	Sertad2	ENSMUST00000109586;ENSMUST00000093292;ENSMUST00000109585;ENSMUST00000145328	GO:0003713(transcription coactivator activity);GO:0005515(protein binding);GO:0005634(nucleus);GO:0005654(nucleoplasm);GO:0005737(cytoplasm);GO:0005829(cytosol);GO:0030308(negative regulation of cell growth);GO:0045893(positive regulation of transcription, DNA-templated);GO:0048096(chromatin-mediated maintenance of transcription);GO:0048096(chromatin-mediated maintenance of transcription)	NA	NA	NA	SERTA domain containing 2 [Source:MGI Symbol;Acc:MGI:1931026]	protein_coding;processed_transcript	1.47567	2.60125	2.51152	2.34417	5.31451	5.15147	0.514314	-0.959279	0.00725564	0.722093	down	no
ENSMUSG00000018362	Kpna2	ENSMUST00000018506;ENSMUST00000145331;ENSMUST00000156495;ENSMUST00000144834;ENSMUST00000106768;ENSMUST00000140362;ENSMUST00000124541	GO:0005515(protein binding);GO:0005634(nucleus);GO:0005654(nucleoplasm);GO:0005737(cytoplasm);GO:0005829(cytosol);GO:0006606(protein import into nucleus);GO:0006607(NLS-bearing protein import into nucleus);GO:0008139(nuclear localization sequence binding);GO:0010494(cytoplasmic stress granule);GO:0015031(protein transport);GO:0042025(host cell nucleus);GO:0042826(histone deacetylase binding);GO:0…	05164(Influenza A);05164(Influenza A)	K15043	NA	karyopherin (importin) alpha 2 [Source:MGI Symbol;Acc:MGI:103561]	protein_coding;nonsense_mediated_decay;retained_intron	26.0113	25.7363	26.2507	33.6511	33.546	48.6367	0.673364	-0.570541	0.00776586	0.762847	down	no
ENSMUSG00000101939	Gm28438	ENSMUST00000188299	NA	NA	NA	NA	predicted gene 28438 [Source:MGI Symbol;Acc:MGI:5579144]	unprocessed_pseudogene	587.582	432.439	354.805	325.431	269.514	273.66	1.5828	0.662476	0.00798308	0.779571	up	no
ENSMUSG00000037313	Tacc3	ENSMUST00000114426;ENSMUST00000074849;ENSMUST00000079534;ENSMUST00000138240;ENSMUST00000139453;ENSMUST00000139888;ENSMUST00000152847;ENSMUST00000201633	GO:0005737(cytoplasm);GO:0005815(microtubule organizing center);GO:0005856(cytoskeleton);GO:0007052(mitotic spindle organization);GO:0007052(mitotic spindle organization)	03013(RNA transport);03013(RNA transport)	K14283	NA	transforming, acidic coiled-coil containing protein 3 [Source:MGI Symbol;Acc:MGI:1341163]	protein_coding;retained_intron	10.9999	10.4701	9.31594	13.9443	15.5165	15.527	0.684317	-0.547263	0.00856523	0.826555	down	no
ENSMUSG00000070780	Rbm47	ENSMUST00000202794;ENSMUST00000094756;ENSMUST00000200775;ENSMUST00000201544;ENSMUST00000200852;ENSMUST00000202700;ENSMUST00000113724;ENSMUST00000113726;ENSMUST00000167950;ENSMUST00000201670;ENSMUST00000201605;ENSMUST00000201561;ENSMUST00000201311;ENSMUST00000094757	GO:0002244(hematopoietic progenitor cell differentiation);GO:0003676(nucleic acid binding);GO:0003723(RNA binding);GO:0003729(mRNA binding);GO:0005515(protein binding);GO:0005634(nucleus);GO:0016554(cytidine to uridine editing);GO:0016554(cytidine to uridine editing)	NA	NA	NA	RNA binding motif protein 47 [Source:MGI Symbol;Acc:MGI:2384294]	retained_intron;protein_coding;processed_transcript	9.64255	6.05377	7.38739	4.43203	4.82904	5.36425	1.57834	0.658407	0.00872351	0.82762	up	no
ENSMUSG00000030717	Nupr1	ENSMUST00000187609;ENSMUST00000191192;ENSMUST00000032961;ENSMUST00000131174;ENSMUST00000151105;ENSMUST00000191413	GO:0002526(acute inflammatory response);GO:0003677(DNA binding);GO:0003682(chromatin binding);GO:0003713(transcription coactivator activity);GO:0005515(protein binding);GO:0005634(nucleus);GO:0005654(nucleoplasm);GO:0005737(cytoplasm);GO:0006473(protein acetylation);GO:0008285(negative regulation of cell population proliferation);GO:0008584(male gonad development);GO:0009636(response to toxic sub…	05202(Transcriptional misregulation in cancer);05202(Transcriptional misregulation in cancer)	K15626	NA	nuclear protein transcription regulator 1 [Source:MGI Symbol;Acc:MGI:1891834]	nonsense_mediated_decay;protein_coding;retained_intron;processed_transcript	23.0609	55.9594	16.0304	11.5679	19.1126	17.2257	1.9841	0.988488	0.0089464	0.834377	up	no
ENSMUSG00000020914	Top2a	ENSMUST00000068031;ENSMUST00000139460;ENSMUST00000154332;ENSMUST00000129777;ENSMUST00000139730;ENSMUST00000151997;ENSMUST00000144318	GO:0000166(nucleotide binding);GO:0000228(nuclear chromosome);GO:0000287(magnesium ion binding);GO:0000712(resolution of meiotic recombination intermediates);GO:0000775(chromosome, centromeric region);GO:0000793(condensed chromosome);GO:0000819(sister chromatid segregation);GO:0002244(hematopoietic progenitor cell differentiation);GO:0003677(DNA binding);GO:0003682(chromatin binding);GO:0003916(D…	01524(Platinum drug resistance);01524(Platinum drug resistance)	K03164	EC:5.6.2.2	topoisomerase (DNA) II alpha [Source:MGI Symbol;Acc:MGI:98790]	protein_coding;processed_transcript	13.4331	9.43281	11.1295	15.3679	13.5549	24.811	0.632663	-0.66049	0.0091149	0.842455	down	no
ENSMUSG00000022389	Tef	ENSMUST00000023024;ENSMUST00000168632;ENSMUST00000164673;ENSMUST00000109553;ENSMUST00000166302;ENSMUST00000170027;ENSMUST00000169952;ENSMUST00000168200;ENSMUST00000167138;ENSMUST00000172208	GO:0000977(RNA polymerase II regulatory region sequence-specific DNA binding);GO:0000978(RNA polymerase II cis-regulatory region sequence-specific DNA binding);GO:0001228(DNA-binding transcription activator activity, RNA polymerase II-specific);GO:0003677(DNA binding);GO:0003690(double-stranded DNA binding);GO:0003700(DNA-binding transcription factor activity);GO:0005515(protein binding);GO:00056…	NA	NA	NA	thyrotroph embryonic factor [Source:MGI Symbol;Acc:MGI:98663]	protein_coding;retained_intron;processed_transcript	17.2284	27.8171	11.748	4.37769	11.5622	13.0823	1.9569	0.968572	0.00914102	0.842455	up	no
ENSMUSG00000051727	Kctd14	ENSMUST00000206658;ENSMUST00000050732;ENSMUST00000205577;ENSMUST00000206279;ENSMUST00000143321;ENSMUST00000121987	GO:0003674(molecular_function);GO:0005515(protein binding);GO:0005575(cellular_component);GO:0008150(biological_process);GO:0051260(protein homooligomerization);GO:0051260(protein homooligomerization)	NA	K21917	NA	potassium channel tetramerisation domain containing 14 [Source:MGI Symbol;Acc:MGI:1289222]	protein_coding;nonsense_mediated_decay	30.5141	34.4162	28.5866	36.2099	49.8672	50.3699	0.685371	-0.545042	0.00919811	0.842455	down	no
ENSMUSG00000023015	Racgap1	ENSMUST00000023756;ENSMUST00000171017;ENSMUST00000109581;ENSMUST00000171702;ENSMUST00000168976;ENSMUST00000169700;ENSMUST00000168834;ENSMUST00000168065;ENSMUST00000164983;ENSMUST00000171908;ENSMUST00000169810;ENSMUST00000165745;ENSMUST00000170369;ENSMUST00000165730	GO:0000281(mitotic cytokinesis);GO:0000915(actomyosin contractile ring assembly);GO:0001669(acrosomal vesicle);GO:0005096(GTPase activator activity);GO:0005547(phosphatidylinositol-3,4,5-trisphosphate binding);GO:0005634(nucleus);GO:0005654(nucleoplasm);GO:0005737(cytoplasm);GO:0005819(spindle);GO:0005856(cytoskeleton);GO:0005886(plasma membrane);GO:0006811(ion transport);GO:0007049(cell cycle);G…	NA	NA	NA	Rac GTPase-activating protein 1 [Source:MGI Symbol;Acc:MGI:1349423]	protein_coding;retained_intron;processed_transcript;nonsense_mediated_decay	7.70057	6.60344	6.83928	9.77636	8.51503	13.1723	0.67199	-0.573487	0.00925272	0.842455	down	no
ENSMUSG00000027285	Haus2	ENSMUST00000124187;ENSMUST00000028741;ENSMUST00000110706	GO:0003674(molecular_function);GO:0005737(cytoplasm);GO:0005813(centrosome);GO:0005815(microtubule organizing center);GO:0005819(spindle);GO:0005856(cytoskeleton);GO:0005874(microtubule);GO:0005876(spindle microtubule);GO:0007049(cell cycle);GO:0007098(centrosome cycle);GO:0031023(microtubule organizing center organization);GO:0051225(spindle assembly);GO:0051301(cell division);GO:0070652(HAUS co…	NA	K16585	NA	HAUS augmin-like complex, subunit 2 [Source:MGI Symbol;Acc:MGI:1913546]	protein_coding;nonsense_mediated_decay	7.28128	5.98101	6.32381	4.49619	3.14231	3.21705	1.80425	0.851398	0.00929269	0.842455	up	no
ENSMUSG00000020649	Rrm2	ENSMUST00000020980;ENSMUST00000153058;ENSMUST00000154588;ENSMUST00000147789	GO:0004748(ribonucleoside-diphosphate reductase activity, thioredoxin disulfide as acceptor);GO:0005515(protein binding);GO:0005635(nuclear envelope);GO:0005737(cytoplasm);GO:0005829(cytosol);GO:0005971(ribonucleoside-diphosphate reductase complex);GO:0006260(DNA replication);GO:0008199(ferric iron binding);GO:0009262(deoxyribonucleotide metabolic process);GO:0009263(deoxyribonucleotide biosynthe…	00230(Purine metabolism);00240(Pyrimidine metabolism);00480(Glutathione metabolism);00983(Drug metabolism - other enzymes);04115(p53 signaling pathway);04115(p53 signaling pathway)	K10808	EC:1.17.4.1	ribonucleotide reductase M2 [Source:MGI Symbol;Acc:MGI:98181]	protein_coding;retained_intron	10.817	10.7931	11.4115	13.7277	14.6185	24.0074	0.63074	-0.664882	0.00941019	0.842455	down	no
ENSMUSG00000020897	Aurkb	ENSMUST00000021277;ENSMUST00000149018;ENSMUST00000139594;ENSMUST00000108666;ENSMUST00000126576;ENSMUST00000156373;ENSMUST00000140531;ENSMUST00000139457	GO:0000122(negative regulation of transcription by RNA polymerase II);GO:0000166(nucleotide binding);GO:0000775(chromosome, centromeric region);GO:0000776(kinetochore);GO:0000779(condensed chromosome, centromeric region);GO:0000780(condensed nuclear chromosome, centromeric region);GO:0002903(negative regulation of B cell apoptotic process);GO:0004672(protein kinase activity);GO:0004674(protein se…	NA	K11479	EC:2.7.11.1	aurora kinase B [Source:MGI Symbol;Acc:MGI:107168]	protein_coding;retained_intron;processed_transcript	6.96757	5.85536	5.59249	9.61839	8.21273	12.0507	0.616275	-0.698354	0.0096085	0.843972	down	no
ENSMUSG00000085148	Mir22hg	ENSMUST00000149940;ENSMUST00000134345	NA	NA	NA	NA	Mir22 host gene (non-protein coding) [Source:MGI Symbol;Acc:MGI:1914348]	processed_transcript	12.7619	10.9581	11.2115	6.00239	7.02457	7.46482	1.70466	0.769482	0.00970313	0.847799	up	no
ENSMUSG00000019055	Plod1	ENSMUST00000019199;ENSMUST00000124292;ENSMUST00000105712;ENSMUST00000124041;ENSMUST00000132075;ENSMUST00000149129	GO:0001666(response to hypoxia);GO:0005506(iron ion binding);GO:0005515(protein binding);GO:0005783(endoplasmic reticulum);GO:0008198(ferrous iron binding);GO:0008475(procollagen-lysine 5-dioxygenase activity);GO:0008544(epidermis development);GO:0016020(membrane);GO:0016491(oxidoreductase activity);GO:0016705(oxidoreductase activity, acting on paired donors, with incorporation or reduction of mo…	00310(Lysine degradation);00310(Lysine degradation)	K00473	EC:1.14.11.4	procollagen-lysine, 2-oxoglutarate 5-dioxygenase 1 [Source:MGI Symbol;Acc:MGI:99907]	protein_coding;retained_intron;processed_transcript	12.3821	13.055	12.9203	16.4884	18.9892	19.2333	0.701093	-0.512323	0.00993528	0.85904	down	no
ENSMUSG00000020346	Mgat1	ENSMUST00000167400;ENSMUST00000081794;ENSMUST00000156607;ENSMUST00000101293;ENSMUST00000149406;ENSMUST00000148962;ENSMUST00000155806;ENSMUST00000135314;ENSMUST00000152451;ENSMUST00000135489;ENSMUST00000129541;ENSMUST00000129588;ENSMUST00000109194	GO:0000139(Golgi membrane);GO:0001701(in utero embryonic development);GO:0003827(alpha-1,3-mannosylglycoprotein 2-beta-N-acetylglucosaminyltransferase activity);GO:0005737(cytoplasm);GO:0005794(Golgi apparatus);GO:0006049(UDP-N-acetylglucosamine catabolic process);GO:0006486(protein glycosylation);GO:0006487(protein N-linked glycosylation);GO:0008375(acetylglucosaminyltransferase activity);GO:001…	00510(N-Glycan biosynthesis);00510(N-Glycan biosynthesis)	K00726	EC:2.4.1.101	mannoside acetylglucosaminyltransferase 1 [Source:MGI Symbol;Acc:MGI:96973]	protein_coding;processed_transcript	2.26031	2.79523	2.94076	6.97427	4.53513	3.07859	0.548143	-0.867375	0.0103668	0.878061	down	no
ENSMUSG00000032698	Lmo2	ENSMUST00000111140;ENSMUST00000111143;ENSMUST00000123437;ENSMUST00000156813;ENSMUST00000133210;ENSMUST00000111139;ENSMUST00000170926;ENSMUST00000138815	GO:0001102(RNA polymerase II activating transcription factor binding);GO:0001221(transcription cofactor binding);GO:0003677(DNA binding);GO:0003682(chromatin binding);GO:0003713(transcription coactivator activity);GO:0005515(protein binding);GO:0005634(nucleus);GO:0005667(transcription factor complex);GO:0032991(protein-containing complex);GO:0035162(embryonic hemopoiesis);GO:0042802(identical pr…	05202(Transcriptional misregulation in cancer);05202(Transcriptional misregulation in cancer)	K15612	NA	LIM domain only 2 [Source:MGI Symbol;Acc:MGI:102811]	protein_coding;processed_transcript	3.10032	2.92834	2.9049	5.63545	3.88014	7.08438	0.538167	-0.893874	0.0110012	0.908615	down	no
ENSMUSG00000082585	Gm15387	ENSMUST00000120421	NA	NA	NA	NA	predicted gene 15387 [Source:MGI Symbol;Acc:MGI:3705374]	processed_pseudogene	43.2267	59.1191	68.2999	65.2562	159.473	73.4329	0.572324	-0.805095	0.0111959	0.920111	down	no
ENSMUSG00000027365	Trpm7	ENSMUST00000103224;ENSMUST00000028843;ENSMUST00000127277;ENSMUST00000136964;ENSMUST00000125327;ENSMUST00000134408;ENSMUST00000132003;ENSMUST00000155675;ENSMUST00000135733;ENSMUST00000152615;ENSMUST00000142334	GO:0000166(nucleotide binding);GO:0001726(ruffle);GO:0003779(actin binding);GO:0004672(protein kinase activity);GO:0004674(protein serine/threonine kinase activity);GO:0005216(ion channel activity);GO:0005261(cation channel activity);GO:0005262(calcium channel activity);GO:0005515(protein binding);GO:0005524(ATP binding);GO:0005737(cytoplasm);GO:0005886(plasma membrane);GO:0006468(protein phospho…	04217(Necroptosis);04218(Cellular senescence);04621(NOD-like receptor signaling pathway);04978(Mineral absorption);04978(Mineral absorption)	K04982	EC:2.7.11.1	transient receptor potential cation channel, subfamily M, member 7 [Source:MGI Symbol;Acc:MGI:1929996]	protein_coding;retained_intron;processed_transcript	6.11692	5.30633	5.13909	4.19823	3.40198	3.42859	1.50174	0.586631	0.0114617	0.93732	up	no
ENSMUSG00000051378	Kif18b	ENSMUST00000021311;ENSMUST00000132502	GO:0000070(mitotic sister chromatid segregation);GO:0000166(nucleotide binding);GO:0000235(astral microtubule);GO:0000278(mitotic cell cycle);GO:0003774(motor activity);GO:0003777(microtubule motor activity);GO:0005524(ATP binding);GO:0005634(nucleus);GO:0005654(nucleoplasm);GO:0005737(cytoplasm);GO:0005829(cytosol);GO:0005856(cytoskeleton);GO:0005871(kinesin complex);GO:0005874(microtubule);GO:0…	NA	NA	NA	kinesin family member 18B [Source:MGI Symbol;Acc:MGI:2446979]	protein_coding;processed_transcript	4.2908	4.28046	4.27733	6.53246	5.50945	9.30272	0.601959	-0.732264	0.0115614	0.939832	down	no
ENSMUSG00000000275	Trim25	ENSMUST00000107896;ENSMUST00000100627;ENSMUST00000000284	GO:0002376(immune system process);GO:0005515(protein binding);GO:0005654(nucleoplasm);GO:0005737(cytoplasm);GO:0005829(cytosol);GO:0006511(ubiquitin-dependent protein catabolic process);GO:0006513(protein monoubiquitination);GO:0010494(cytoplasmic stress granule);GO:0016567(protein ubiquitination);GO:0016604(nuclear body);GO:0016740(transferase activity);GO:0016874(ligase activity);GO:0030433(ubi…	04064(NF-kappa B signaling pathway);04622(RIG-I-like receptor signaling pathway);05164(Influenza A);05164(Influenza A)	K10652	EC:2.3.2.27	tripartite motif-containing 25 [Source:MGI Symbol;Acc:MGI:102749]	protein_coding	15.8769	4.4588	6.02677	14.2737	16.0797	18.4934	0.539697	-0.889778	0.0116131	0.939832	down	no
ENSMUSG00000051341	Zfp52	ENSMUST00000233281;ENSMUST00000079242	GO:0003676(nucleic acid binding);GO:0006355(regulation of transcription, DNA-templated);GO:0046872(metal ion binding);GO:0046872(metal ion binding)	05168(Herpes simplex virus 1 infection);05168(Herpes simplex virus 1 infection)	K09228	NA	zinc finger protein 52 [Source:MGI Symbol;Acc:MGI:99199]	protein_coding	4.90248	5.79484	7.18959	3.14848	2.86774	4.00186	1.78546	0.836298	0.0116623	0.939832	up	no
ENSMUSG00000053113	Socs3	ENSMUST00000054002;ENSMUST00000132295;ENSMUST00000123255	GO:0001784(phosphotyrosine residue binding);GO:0001932(regulation of protein phosphorylation);GO:0005515(protein binding);GO:0005737(cytoplasm);GO:0005829(cytosol);GO:0005942(phosphatidylinositol 3-kinase complex);GO:0007165(signal transduction);GO:0007259(receptor signaling pathway via JAK-STAT);GO:0009968(negative regulation of signal transduction);GO:0016567(protein ubiquitination);GO:0035556(…	04120(Ubiquitin mediated proteolysis);04380(Osteoclast differentiation);04630(Jak-STAT signaling pathway);04668(TNF signaling pathway);04910(Insulin signaling pathway);04917(Prolactin signaling pathway);04920(Adipocytokine signaling pathway);04930(Type II diabetes mellitus);04931(Insulin resistance);04932(Non-alcoholic fatty liver disease (NAFLD));05160(Hepatitis C);05164(Influenza A);05168(Herpe…	K04696	NA	suppressor of cytokine signaling 3 [Source:MGI Symbol;Acc:MGI:1201791]	protein_coding;processed_transcript	8.5077	9.16256	8.50796	12.0875	19.1651	10.6523	0.624707	-0.678749	0.0120491	0.966314	down	no
ENSMUSG00000028678	Kif2c	ENSMUST00000065896;ENSMUST00000132868;ENSMUST00000142205;ENSMUST00000106436;ENSMUST00000142138;ENSMUST00000153953;ENSMUST00000148918;ENSMUST00000141675	GO:0000166(nucleotide binding);GO:0000775(chromosome, centromeric region);GO:0000776(kinetochore);GO:0000777(condensed chromosome kinetochore);GO:0003774(motor activity);GO:0003777(microtubule motor activity);GO:0005524(ATP binding);GO:0005634(nucleus);GO:0005694(chromosome);GO:0005737(cytoplasm);GO:0005813(centrosome);GO:0005819(spindle);GO:0005856(cytoskeleton);GO:0005871(kinesin complex);GO:00…	NA	K10393	NA	kinesin family member 2C [Source:MGI Symbol;Acc:MGI:1921054]	protein_coding;retained_intron;processed_transcript	5.65776	5.2091	5.17255	8.30732	6.04615	11.389	0.623073	-0.682528	0.0126112	1	down	no
ENSMUSG00000048922	Cdca2	ENSMUST00000124045;ENSMUST00000132705;ENSMUST00000163100;ENSMUST00000131179;ENSMUST00000150006;ENSMUST00000155312;ENSMUST00000130922	GO:0003674(molecular_function);GO:0005634(nucleus);GO:0005654(nucleoplasm);GO:0005694(chromosome);GO:0005829(cytosol);GO:0007049(cell cycle);GO:0007059(chromosome segregation);GO:0035307(positive regulation of protein dephosphorylation);GO:0051301(cell division);GO:0051301(cell division)	NA	K17590	NA	cell division cycle associated 2 [Source:MGI Symbol;Acc:MGI:1919787]	protein_coding;retained_intron;nonsense_mediated_decay	2.81873	2.26343	2.52331	3.80888	3.23604	5.74773	0.594519	-0.750204	0.0126892	1	down	no
ENSMUSG00000029414	Kntc1	ENSMUST00000031366;ENSMUST00000197002;ENSMUST00000197265;ENSMUST00000198716;ENSMUST00000198841;ENSMUST00000199838;ENSMUST00000197665	GO:0000775(chromosome, centromeric region);GO:0000776(kinetochore);GO:0000777(condensed chromosome kinetochore);GO:0000922(spindle pole);GO:0003674(molecular_function);GO:0005515(protein binding);GO:0005634(nucleus);GO:0005694(chromosome);GO:0005737(cytoplasm);GO:0005819(spindle);GO:0005828(kinetochore microtubule);GO:0005829(cytosol);GO:0005856(cytoskeleton);GO:0005886(plasma membrane);GO:000704…	NA	K11577	NA	kinetochore associated 1 [Source:MGI Symbol;Acc:MGI:2673709]	protein_coding;retained_intron;nonsense_mediated_decay;processed_transcript	1.86177	1.57685	1.58321	2.36535	2.51164	3.38729	0.607655	-0.718675	0.0128899	1	down	no
ENSMUSG00000027715	Ccna2	ENSMUST00000029270;ENSMUST00000196316;ENSMUST00000145309;ENSMUST00000156575;ENSMUST00000147380	GO:0000079(regulation of cyclin-dependent protein serine/threonine kinase activity);GO:0000086(G2/M transition of mitotic cell cycle);GO:0000307(cyclin-dependent protein kinase holoenzyme complex);GO:0001939(female pronucleus);GO:0001940(male pronucleus);GO:0005515(protein binding);GO:0005634(nucleus);GO:0005654(nucleoplasm);GO:0005737(cytoplasm);GO:0005829(cytosol);GO:0006275(regulation of DNA r…	04110(Cell cycle);04152(AMPK signaling pathway);04218(Cellular senescence);04914(Progesterone-mediated oocyte maturation);05161(Hepatitis B);05165(Human papillomavirus infection);05166(Human T-cell leukemia virus 1 infection);05169(Epstein-Barr virus infection);05203(Viral carcinogenesis);05203(Viral carcinogenesis)	K06627	NA	cyclin A2 [Source:MGI Symbol;Acc:MGI:108069]	protein_coding;retained_intron;processed_transcript;nonsense_mediated_decay	16.0135	10.7156	13.6596	18.5657	15.7305	26.6629	0.662554	-0.593891	0.0129431	1	down	no
ENSMUSG00000047213	Ythdf3	ENSMUST00000191774;ENSMUST00000108346;ENSMUST00000108345;ENSMUST00000193598	GO:0003723(RNA binding);GO:0003729(mRNA binding);GO:0005737(cytoplasm);GO:0005829(cytosol);GO:0043022(ribosome binding);GO:0045727(positive regulation of translation);GO:0045948(positive regulation of translational initiation);GO:0060339(negative regulation of type I interferon-mediated signaling pathway);GO:0061157(mRNA destabilization);GO:1990247(N6-methyladenosine-containing RNA binding);GO:19…	NA	K20102	NA	YTH N6-methyladenosine RNA binding protein 3 [Source:MGI Symbol;Acc:MGI:1918850]	protein_coding;processed_transcript	15.0669	13.7699	14.239	6.55453	12.1284	9.37536	1.53522	0.618449	0.0129544	1	up	no
ENSMUSG00000030677	Kif22	ENSMUST00000032915;ENSMUST00000206924;ENSMUST00000206412;ENSMUST00000205806;ENSMUST00000206655;ENSMUST00000205754	GO:0000166(nucleotide binding);GO:0000785(chromatin);GO:0003677(DNA binding);GO:0003774(motor activity);GO:0003777(microtubule motor activity);GO:0005524(ATP binding);GO:0005634(nucleus);GO:0005737(cytoplasm);GO:0005739(mitochondrion);GO:0005819(spindle);GO:0005829(cytosol);GO:0005856(cytoskeleton);GO:0005871(kinesin complex);GO:0005874(microtubule);GO:0006281(DNA repair);GO:0006392(transcription…	04914(Progesterone-mediated oocyte maturation);04914(Progesterone-mediated oocyte maturation)	K10403	NA	kinesin family member 22 [Source:MGI Symbol;Acc:MGI:109233]	protein_coding;retained_intron	7.35316	6.18226	6.52339	9.73285	7.83416	12.8367	0.65975	-0.60001	0.0130684	1	down	no
ENSMUSG00000032411	Tfdp2	ENSMUST00000165768;ENSMUST00000185644;ENSMUST00000034982;ENSMUST00000188750;ENSMUST00000190689;ENSMUST00000179416;ENSMUST00000190709;ENSMUST00000189606;ENSMUST00000179065;ENSMUST00000188829;ENSMUST00000190104;ENSMUST00000165120;ENSMUST00000191390;ENSMUST00000191133;ENSMUST00000188008;ENSMUST00000186609	GO:0000278(mitotic cell cycle);GO:0000977(RNA polymerase II regulatory region sequence-specific DNA binding);GO:0000981(DNA-binding transcription factor activity, RNA polymerase II-specific);GO:0001228(DNA-binding transcription activator activity, RNA polymerase II-specific);GO:0003677(DNA binding);GO:0003700(DNA-binding transcription factor activity);GO:0003712(transcription coregulator activity…	04110(Cell cycle);04110(Cell cycle)	K09392	NA	transcription factor Dp 2 [Source:MGI Symbol;Acc:MGI:107167]	protein_coding;retained_intron;processed_transcript	1.44182	1.21678	1.37319	2.05551	1.6428	2.84363	0.616299	-0.698298	0.0131322	1	down	no
ENSMUSG00000040204	Pclaf	ENSMUST00000045802;ENSMUST00000130308;ENSMUST00000153841	GO:0003682(chromatin binding);GO:0005634(nucleus);GO:0005737(cytoplasm);GO:0005813(centrosome);GO:0006260(DNA replication);GO:0006281(DNA repair);GO:0006974(cellular response to DNA damage stimulus);GO:0007098(centrosome cycle);GO:0009411(response to UV);GO:0019985(translesion synthesis);GO:0048471(perinuclear region of cytoplasm);GO:0051726(regulation of cell cycle);GO:0051726(regulation of cell…	NA	NA	NA	PCNA clamp associated factor [Source:MGI Symbol;Acc:MGI:1915276]	protein_coding;retained_intron	6.84831	4.66741	6.19147	7.51501	8.38548	12.0706	0.633055	-0.659598	0.0131971	1	down	no
ENSMUSG00000001517	Foxm1	ENSMUST00000073316;ENSMUST00000153423;ENSMUST00000136395;ENSMUST00000203040;ENSMUST00000125456;ENSMUST00000112148;ENSMUST00000203258;ENSMUST00000123988	GO:0000086(G2/M transition of mitotic cell cycle);GO:0000122(negative regulation of transcription by RNA polymerase II);GO:0000977(RNA polymerase II regulatory region sequence-specific DNA binding);GO:0003677(DNA binding);GO:0003700(DNA-binding transcription factor activity);GO:0005634(nucleus);GO:0006355(regulation of transcription, DNA-templated);GO:0006978(DNA damage response, signal transduct…	04218(Cellular senescence);04218(Cellular senescence)	K09406	NA	forkhead box M1 [Source:MGI Symbol;Acc:MGI:1347487]	protein_coding;retained_intron;processed_transcript	3.0247	6.32695	4.88694	8.2034	6.4189	8.5172	0.615337	-0.700551	0.0134405	1	down	no
ENSMUSG00000002055	Spag5	ENSMUST00000045026;ENSMUST00000146068;ENSMUST00000128359;ENSMUST00000141026;ENSMUST00000133579;ENSMUST00000149711;ENSMUST00000150016;ENSMUST00000125477	GO:0000070(mitotic sister chromatid segregation);GO:0000775(chromosome, centromeric region);GO:0000776(kinetochore);GO:0000777(condensed chromosome kinetochore);GO:0000922(spindle pole);GO:0005694(chromosome);GO:0005737(cytoplasm);GO:0005815(microtubule organizing center);GO:0005819(spindle);GO:0005856(cytoskeleton);GO:0005874(microtubule);GO:0005876(spindle microtubule);GO:0007049(cell cycle);GO…	NA	K21764	NA	sperm associated antigen 5 [Source:MGI Symbol;Acc:MGI:1927470]	protein_coding;retained_intron;processed_transcript	5.08569	4.02826	4.4085	6.84829	5.42521	8.82036	0.641061	-0.641466	0.0135262	1	down	no
ENSMUSG00000028337	Coro2a	ENSMUST00000107756;ENSMUST00000139179;ENSMUST00000107757;ENSMUST00000030021;ENSMUST00000135062;ENSMUST00000127304;ENSMUST00000129121	GO:0003779(actin binding);GO:0005515(protein binding);GO:0005903(brush border);GO:0017053(transcriptional repressor complex);GO:0051015(actin filament binding);GO:0051015(actin filament binding)	NA	K13887	NA	coronin, actin binding protein 2A [Source:MGI Symbol;Acc:MGI:1345966]	protein_coding;retained_intron;processed_transcript	18.3819	7.4279	7.83578	3.35243	8.16036	6.30909	1.88788	0.916768	0.0135409	1	up	no
ENSMUSG00000028873	Cdca8	ENSMUST00000084296;ENSMUST00000147074;ENSMUST00000135571;ENSMUST00000165281;ENSMUST00000125801;ENSMUST00000030690	GO:0000070(mitotic sister chromatid segregation);GO:0000775(chromosome, centromeric region);GO:0005515(protein binding);GO:0005634(nucleus);GO:0005654(nucleoplasm);GO:0005694(chromosome);GO:0005730(nucleolus);GO:0005737(cytoplasm);GO:0005819(spindle);GO:0005856(cytoskeleton);GO:0007049(cell cycle);GO:0007080(mitotic metaphase plate congression);GO:0010369(chromocenter);GO:0030496(midbody);GO:0032…	NA	K11514	NA	cell division cycle associated 8 [Source:MGI Symbol;Acc:MGI:1196274]	protein_coding;retained_intron;processed_transcript	6.32365	5.00761	5.22589	8.45147	6.85718	9.79913	0.659443	-0.60068	0.0135731	1	down	no
ENSMUSG00000022385	Gtse1	ENSMUST00000231074;ENSMUST00000170629	GO:0005737(cytoplasm);GO:0005856(cytoskeleton);GO:0005874(microtubule);GO:0005881(cytoplasmic microtubule);GO:0008017(microtubule binding);GO:0015630(microtubule cytoskeleton);GO:0015630(microtubule cytoskeleton)	04115(p53 signaling pathway);04115(p53 signaling pathway)	K10129	NA	G two S phase expressed protein 1 [Source:MGI Symbol;Acc:MGI:1352755]	protein_coding	3.71837	3.95426	4.99023	7.28026	5.91969	8.26675	0.589884	-0.761498	0.0137285	1	down	no
ENSMUSG00000021702	Thbs4	ENSMUST00000022213;ENSMUST00000168299	GO:0001938(positive regulation of endothelial cell proliferation);GO:0001968(fibronectin binding);GO:0005178(integrin binding);GO:0005201(extracellular matrix structural constituent);GO:0005509(calcium ion binding);GO:0005515(protein binding);GO:0005518(collagen binding);GO:0005576(extracellular region);GO:0005604(basement membrane);GO:0005615(extracellular space);GO:0005783(endoplasmic reticulum…	04145(Phagosome);04151(PI3K-Akt signaling pathway);04510(Focal adhesion);04512(ECM-receptor interaction);05144(Malaria);05165(Human papillomavirus infection);05165(Human papillomavirus infection)	K04659	NA	thrombospondin 4 [Source:MGI Symbol;Acc:MGI:1101779]	protein_coding;retained_intron	53.8298	71.2399	47.7266	71.3329	67.8619	134.718	0.630845	-0.664642	0.013824	1	down	no
ENSMUSG00000092035	Peg10	ENSMUST00000166678;ENSMUST00000176204;ENSMUST00000176551	GO:0001890(placenta development);GO:0003676(nucleic acid binding);GO:0003677(DNA binding);GO:0005634(nucleus);GO:0005654(nucleoplasm);GO:0005737(cytoplasm);GO:0005829(cytosol);GO:0006915(apoptotic process);GO:0008270(zinc ion binding);GO:0030154(cell differentiation);GO:0030512(negative regulation of transforming growth factor beta receptor signaling pathway);GO:0046872(metal ion binding);GO:0046…	NA	NA	NA	paternally expressed 10 [Source:MGI Symbol;Acc:MGI:2157785]	protein_coding	11.5158	11.3314	8.74151	10.8381	20.202	16.4985	0.664486	-0.58969	0.0139045	1	down	no
ENSMUSG00000007080	Pole	ENSMUST00000131887;ENSMUST00000007296;ENSMUST00000112481;ENSMUST00000112482;ENSMUST00000182442;ENSMUST00000141506;ENSMUST00000152495	GO:0000082(G1/S transition of mitotic cell cycle);GO:0000166(nucleotide binding);GO:0000278(mitotic cell cycle);GO:0000731(DNA synthesis involved in DNA repair);GO:0003676(nucleic acid binding);GO:0003677(DNA binding);GO:0003682(chromatin binding);GO:0003887(DNA-directed DNA polymerase activity);GO:0005634(nucleus);GO:0005654(nucleoplasm);GO:0005886(plasma membrane);GO:0006260(DNA replication);GO…	03030(DNA replication);03410(Base excision repair);03420(Nucleotide excision repair);03420(Nucleotide excision repair)	K02324	EC:2.7.7.7	polymerase (DNA directed), epsilon [Source:MGI Symbol;Acc:MGI:1196391]	retained_intron;protein_coding	2.42979	2.10614	2.02087	2.9328	3.26109	3.71539	0.661682	-0.595789	0.0140718	1	down	no
ENSMUSG00000021822	Plau	ENSMUST00000022368;ENSMUST00000224141	GO:0001525(angiogenesis);GO:0001666(response to hypoxia);GO:0004252(serine-type endopeptidase activity);GO:0005515(protein binding);GO:0005576(extracellular region);GO:0005615(extracellular space);GO:0006508(proteolysis);GO:0008233(peptidase activity);GO:0008236(serine-type peptidase activity);GO:0008284(positive regulation of cell population proliferation);GO:0009986(cell surface);GO:0010469(reg…	04064(NF-kappa B signaling pathway);04610(Complement and coagulation cascades);05202(Transcriptional misregulation in cancer);05205(Proteoglycans in cancer);05206(MicroRNAs in cancer);05215(Prostate cancer);05215(Prostate cancer)	K01348	EC:3.4.21.73	plasminogen activator, urokinase [Source:MGI Symbol;Acc:MGI:97611]	protein_coding;nonsense_mediated_decay	38.1936	60.3841	50.9036	60.729	82.1227	77.2442	0.679164	-0.558168	0.0142767	1	down	no
ENSMUSG00000059401	Mamld1	ENSMUST00000114629;ENSMUST00000239162;ENSMUST00000082088	GO:0003674(molecular_function);GO:0005634(nucleus);GO:0006357(regulation of transcription by RNA polymerase II);GO:0016604(nuclear body);GO:0016604(nuclear body)	NA	K19512	NA	mastermind-like domain containing 1 [Source:MGI Symbol;Acc:MGI:3045303]	protein_coding	13.9304	15.7571	12.2024	15.3117	22.1937	22.6423	0.696451	-0.521907	0.0146003	1	down	no
ENSMUSG00000026238	Ptma	ENSMUST00000186255;ENSMUST00000045897;ENSMUST00000186932;ENSMUST00000188533;ENSMUST00000188699	GO:0005634(nucleus);GO:0005654(nucleoplasm);GO:0005829(cytosol);GO:0033613(activating transcription factor binding);GO:0042393(histone binding);GO:0043066(negative regulation of apoptotic process);GO:0043486(histone exchange);GO:0043486(histone exchange)	NA	K13784	NA	prothymosin alpha [Source:MGI Symbol;Acc:MGI:97803]	protein_coding;processed_transcript	586.327	626.538	545.818	467.471	384.831	283.636	1.54822	0.630612	0.0152123	1	up	no
ENSMUSG00000085396	Firre	ENSMUST00000203933;ENSMUST00000204991;ENSMUST00000136518;ENSMUST00000204974;ENSMUST00000205059;ENSMUST00000204729;ENSMUST00000124842;ENSMUST00000203672;ENSMUST00000148530;ENSMUST00000143999	NA	NA	NA	NA	functional intergenic repeating RNA element [Source:MGI Symbol;Acc:MGI:2147989]	processed_transcript	16.7138	16.4877	11.8564	8.89367	10.5462	11.1439	1.47326	0.559016	0.0153675	1	up	no
ENSMUSG00000031691	Tnpo2	ENSMUST00000166592;ENSMUST00000210576;ENSMUST00000211601;ENSMUST00000093360;ENSMUST00000210945;ENSMUST00000210117;ENSMUST00000210461	GO:0005515(protein binding);GO:0005634(nucleus);GO:0005737(cytoplasm);GO:0006606(protein import into nucleus);GO:0006886(intracellular protein transport);GO:0008139(nuclear localization sequence binding);GO:0008536(Ran GTPase binding);GO:0015031(protein transport);GO:0051148(negative regulation of muscle cell differentiation);GO:0061608(nuclear import signal receptor activity);GO:0061608(nuclear …	NA	K18727	NA	transportin 2 (importin 3, karyopherin beta 2b) [Source:MGI Symbol;Acc:MGI:2384849]	protein_coding;retained_intron;processed_transcript	17.7825	18.2245	18.7184	14.5824	12.2808	9.26472	1.51477	0.599094	0.0154324	1	up	no
ENSMUSG00000000031	H19	ENSMUST00000136359;ENSMUST00000140716;ENSMUST00000152754;ENSMUST00000228259;ENSMUST00000132294;ENSMUST00000149974;ENSMUST00000228514	NA	NA	NA	NA	H19, imprinted maternally expressed transcript [Source:MGI Symbol;Acc:MGI:95891]	lincRNA	9.6855	4.51788	9.51927	4.44815	4.9892	2.59775	1.97112	0.979017	0.0154522	1	up	no
ENSMUSG00000092341	Malat1	ENSMUST00000172812;ENSMUST00000174808;ENSMUST00000173314;ENSMUST00000173499	NA	NA	NA	NA	metastasis associated lung adenocarcinoma transcript 1 (non-coding RNA) [Source:MGI Symbol;Acc:MGI:1919539]	lincRNA	138.653	93.4807	87.3483	206.47	314.814	77.2036	0.533815	-0.905589	0.0159808	1	down	no
ENSMUSG00000035258	Abi3bp	ENSMUST00000231781;ENSMUST00000231832;ENSMUST00000096013;ENSMUST00000096012;ENSMUST00000231870;ENSMUST00000171000;ENSMUST00000048471;ENSMUST00000231337	GO:0005201(extracellular matrix structural constituent);GO:0005515(protein binding);GO:0005518(collagen binding);GO:0005539(glycosaminoglycan binding);GO:0005614(interstitial matrix);GO:0008201(heparin binding);GO:0010811(positive regulation of cell-substrate adhesion);GO:0030198(extracellular matrix organization);GO:0031012(extracellular matrix);GO:0062023(collagen-containing extracellular matri…	NA	NA	NA	ABI gene family, member 3 (NESH) binding protein [Source:MGI Symbol;Acc:MGI:2444583]	protein_coding;retained_intron	1.94959	1.41767	0.827633	0.580799	0.793077	0.726637	1.99708	0.99789	0.0160899	1	up	no
ENSMUSG00000058290	Espl1	ENSMUST00000229050;ENSMUST00000064924;ENSMUST00000231104;ENSMUST00000229942;ENSMUST00000230617;ENSMUST00000230212;ENSMUST00000231207;ENSMUST00000230222;ENSMUST00000230116	GO:0000070(mitotic sister chromatid segregation);GO:0000212(meiotic spindle organization);GO:0000278(mitotic cell cycle);GO:0004197(cysteine-type endopeptidase activity);GO:0005634(nucleus);GO:0005737(cytoplasm);GO:0005813(centrosome);GO:0006508(proteolysis);GO:0007059(chromosome segregation);GO:0007127(meiosis I);GO:0008233(peptidase activity);GO:0008234(cysteine-type peptidase activity);GO:0016…	04110(Cell cycle);04114(Oocyte meiosis);05166(Human T-cell leukemia virus 1 infection);05166(Human T-cell leukemia virus 1 infection)	K02365	EC:3.4.22.49	extra spindle pole bodies 1, separase [Source:MGI Symbol;Acc:MGI:2146156]	protein_coding;nonsense_mediated_decay;retained_intron	2.46785	2.44417	1.94298	3.39286	2.98986	4.18837	0.648468	-0.624893	0.0162391	1	down	no
ENSMUSG00000034342	Cbl	ENSMUST00000037644;ENSMUST00000206720;ENSMUST00000206163;ENSMUST00000206629;ENSMUST00000206147;ENSMUST00000206540;ENSMUST00000206258;ENSMUST00000205755;ENSMUST00000205313;ENSMUST00000206125;ENSMUST00000205968	GO:0000209(protein polyubiquitination);GO:0001784(phosphotyrosine residue binding);GO:0004842(ubiquitin-protein transferase activity);GO:0005154(epidermal growth factor receptor binding);GO:0005509(calcium ion binding);GO:0005515(protein binding);GO:0005737(cytoplasm);GO:0005794(Golgi apparatus);GO:0005829(cytosol);GO:0005886(plasma membrane);GO:0005925(focal adhesion);GO:0005929(cilium);GO:00064…	04012(ErbB signaling pathway);04120(Ubiquitin mediated proteolysis);04144(Endocytosis);04910(Insulin signaling pathway);05100(Bacterial invasion of epithelial cells);05200(Pathways in cancer);05205(Proteoglycans in cancer);05220(Chronic myeloid leukemia);05220(Chronic myeloid leukemia)	K04707	EC:2.3.2.27	Casitas B-lineage lymphoma [Source:MGI Symbol;Acc:MGI:88279]	protein_coding;processed_transcript;retained_intron	6.29234	5.91801	5.49447	5.47843	2.13903	2.49551	1.7507	0.807935	0.0164047	1	up	no
ENSMUSG00000027650	Tti1	ENSMUST00000029179;ENSMUST00000109522;ENSMUST00000126541;ENSMUST00000124338	GO:0003674(molecular_function);GO:0005737(cytoplasm);GO:0031931(TORC1 complex);GO:0031932(TORC2 complex);GO:0032006(regulation of TOR signaling);GO:0070209(ASTRA complex);GO:0070209(ASTRA complex)	04150(mTOR signaling pathway);04150(mTOR signaling pathway)	K20403	NA	TELO2 interacting protein 1 [Source:MGI Symbol;Acc:MGI:1922675]	protein_coding;processed_transcript	6.87242	9.42314	6.35328	9.46848	11.4337	12.6572	0.674889	-0.567279	0.0164909	1	down	no
ENSMUSG00000020189	Osbpl8	ENSMUST00000095310;ENSMUST00000105275;ENSMUST00000238838;ENSMUST00000217693;ENSMUST00000220139	GO:0001786(phosphatidylserine binding);GO:0005515(protein binding);GO:0005634(nucleus);GO:0005783(endoplasmic reticulum);GO:0005789(endoplasmic reticulum membrane);GO:0005829(cytosol);GO:0006869(lipid transport);GO:0008289(lipid binding);GO:0010891(negative regulation of sequestering of triglyceride);GO:0015248(sterol transporter activity);GO:0015485(cholesterol binding);GO:0015914(phospholipid t…	NA	K22285	NA	oxysterol binding protein-like 8 [Source:MGI Symbol;Acc:MGI:2443807]	protein_coding;processed_transcript;retained_intron	3.19093	0.867191	0.94641	2.81392	3.46546	3.71254	0.500857	-0.997528	0.0166349	1	down	no
ENSMUSG00000064357	mt-Atp6	ENSMUST00000082408	GO:0005739(mitochondrion);GO:0005743(mitochondrial inner membrane);GO:0005753(mitochondrial proton-transporting ATP synthase complex);GO:0006754(ATP biosynthetic process);GO:0006811(ion transport);GO:0007568(aging);GO:0015078(proton transmembrane transporter activity);GO:0015986(ATP synthesis coupled proton transport);GO:0016020(membrane);GO:0016021(integral component of membrane);GO:0016787(hydr…	00190(Oxidative phosphorylation);04714(Thermogenesis);05010(Alzheimer disease);05012(Parkinson disease);05016(Huntington disease)	K02126	NA	mitochondrially encoded ATP synthase 6 [Source:MGI Symbol;Acc:MGI:99927]	protein_coding	725.009	870.37	811.408	501.627	588.145	563.341	1.45591	0.541924	0.0168747	1	up	no
ENSMUSG00000022623	Shank3	ENSMUST00000039074;ENSMUST00000238458;ENSMUST00000109309;ENSMUST00000135214;ENSMUST00000167173;ENSMUST00000154240;ENSMUST00000066545;ENSMUST00000123799;ENSMUST00000230807;ENSMUST00000229559	GO:0000165(MAPK cascade);GO:0001838(embryonic epithelial tube formation);GO:0003779(actin binding);GO:0005515(protein binding);GO:0005737(cytoplasm);GO:0007416(synapse assembly);GO:0007611(learning or memory);GO:0007612(learning);GO:0007613(memory);GO:0007626(locomotory behavior);GO:0008022(protein C-terminus binding);GO:0008270(zinc ion binding);GO:0008328(ionotropic glutamate receptor complex);…	04724(Glutamatergic synapse);04724(Glutamatergic synapse)	K15009	NA	SH3 and multiple ankyrin repeat domains 3 [Source:MGI Symbol;Acc:MGI:1930016]	protein_coding;processed_transcript;nonsense_mediated_decay	2.96786	3.48526	1.57404	1.64374	1.39659	1.51111	1.76366	0.818569	0.0169597	1	up	no
ENSMUSG00000046295	Ankle1	ENSMUST00000125290;ENSMUST00000124520;ENSMUST00000119976;ENSMUST00000136522;ENSMUST00000120725	GO:0004518(nuclease activity);GO:0004519(endonuclease activity);GO:0005515(protein binding);GO:0005634(nucleus);GO:0005737(cytoplasm);GO:0006611(protein export from nucleus);GO:0006974(cellular response to DNA damage stimulus);GO:0016787(hydrolase activity);GO:0045950(negative regulation of mitotic recombination);GO:0090305(nucleic acid phosphodiester bond hydrolysis);GO:1905453(regulation of mye…	NA	K21411	NA	ankyrin repeat and LEM domain containing 1 [Source:MGI Symbol;Acc:MGI:1918775]	retained_intron;protein_coding	1.89213	2.27912	1.62144	3.50173	2.45304	5.00334	0.528621	-0.919693	0.0172367	1	down	no
ENSMUSG00000062933	Gm10123	ENSMUST00000075723	NA	NA	NA	NA	predicted pseudogene 10123 [Source:MGI Symbol;Acc:MGI:3704342]	processed_pseudogene	282.692	305.591	363.569	248.594	155.072	222.598	1.51989	0.603966	0.0175366	1	up	no
ENSMUSG00000032218	Ccnb2	ENSMUST00000034742	GO:0000079(regulation of cyclin-dependent protein serine/threonine kinase activity);GO:0000307(cyclin-dependent protein kinase holoenzyme complex);GO:0001701(in utero embryonic development);GO:0005634(nucleus);GO:0005737(cytoplasm);GO:0005813(centrosome);GO:0005829(cytosol);GO:0007049(cell cycle);GO:0015630(microtubule cytoskeleton);GO:0016020(membrane);GO:0016538(cyclin-dependent protein serine/…	04068(FoxO signaling pathway);04110(Cell cycle);04114(Oocyte meiosis);04115(p53 signaling pathway);04218(Cellular senescence);04914(Progesterone-mediated oocyte maturation);05166(Human T-cell leukemia virus 1 infection);05170(Human immunodeficiency virus 1 infection)	K21770	NA	cyclin B2 [Source:MGI Symbol;Acc:MGI:88311]	protein_coding	24.4671	23.7755	21.209	32.8024	24.561	46.8086	0.666701	-0.584889	0.018124	1	down	no
ENSMUSG00000024947	Men1	ENSMUST00000113502;ENSMUST00000078137;ENSMUST00000056391;ENSMUST00000079327;ENSMUST00000156154;ENSMUST00000238038;ENSMUST00000113504;ENSMUST00000113501;ENSMUST00000166909;ENSMUST00000237909;ENSMUST00000113500;ENSMUST00000113503;ENSMUST00000170132;ENSMUST00000170292	GO:0000122(negative regulation of transcription by RNA polymerase II);GO:0000165(MAPK cascade);GO:0000278(mitotic cell cycle);GO:0000400(four-way junction DNA binding);GO:0000403(Y-form DNA binding);GO:0000784(nuclear chromosome, telomeric region);GO:0000785(chromatin);GO:0000790(nuclear chromatin);GO:0000976(transcription regulatory region sequence-specific DNA binding);GO:0001503(ossification);…	04934(Cushing syndrome);05202(Transcriptional misregulation in cancer);05202(Transcriptional misregulation in cancer)	K14970	NA	multiple endocrine neoplasia 1 [Source:MGI Symbol;Acc:MGI:1316736]	protein_coding;retained_intron;nonsense_mediated_decay	21.3748	11.5631	19.5874	11.9635	11.0562	10.8805	1.54941	0.631717	0.0183851	1	up	no
ENSMUSG00000005413	Hmox1	ENSMUST00000005548;ENSMUST00000159631	GO:0001525(angiogenesis);GO:0001666(response to hypoxia);GO:0002246(wound healing involved in inflammatory response);GO:0004392(heme oxygenase (decyclizing) activity);GO:0004630(phospholipase D activity);GO:0005198(structural molecule activity);GO:0005634(nucleus);GO:0005730(nucleolus);GO:0005783(endoplasmic reticulum);GO:0005789(endoplasmic reticulum membrane);GO:0005829(cytosol);GO:0005901(cave…	00860(Porphyrin and chlorophyll metabolism);04066(HIF-1 signaling pathway);04216(Ferroptosis);04978(Mineral absorption);05200(Pathways in cancer);05206(MicroRNAs in cancer);05225(Hepatocellular carcinoma);05418(Fluid shear stress and atherosclerosis);05418(Fluid shear stress and atherosclerosis)	K00510	EC:1.14.14.18	heme oxygenase 1 [Source:MGI Symbol;Acc:MGI:96163]	protein_coding;retained_intron	92.616	46.7443	59.5678	44.1579	48.3074	30.3707	1.61946	0.695513	0.0184664	1	up	no
ENSMUSG00000041570	Camsap2	ENSMUST00000194808;ENSMUST00000192001;ENSMUST00000192933;ENSMUST00000192314;ENSMUST00000194730;ENSMUST00000048309	GO:0000226(microtubule cytoskeleton organization);GO:0005515(protein binding);GO:0005516(calmodulin binding);GO:0005737(cytoplasm);GO:0005794(Golgi apparatus);GO:0005813(centrosome);GO:0005829(cytosol);GO:0005856(cytoskeleton);GO:0005874(microtubule);GO:0007026(negative regulation of microtubule depolymerization);GO:0008017(microtubule binding);GO:0030507(spectrin binding);GO:0031113(regulation o…	NA	K17493	NA	calmodulin regulated spectrin-associated protein family, member 2 [Source:MGI Symbol;Acc:MGI:1922434]	protein_coding;processed_transcript	4.61472	4.43659	4.96982	3.12775	3.28958	2.87518	1.50886	0.593462	0.0185729	1	up	no
ENSMUSG00000028456	Unc13b	ENSMUST00000163653;ENSMUST00000143653;ENSMUST00000079978;ENSMUST00000149945;ENSMUST00000153168;ENSMUST00000107952;ENSMUST00000207708;ENSMUST00000171234;ENSMUST00000132310;ENSMUST00000145899;ENSMUST00000151611;ENSMUST00000107953;ENSMUST00000126878;ENSMUST00000127597;ENSMUST00000207569;ENSMUST00000168032	GO:0001566(non-kinase phorbol ester receptor activity);GO:0005509(calcium ion binding);GO:0005516(calmodulin binding);GO:0005543(phospholipid binding);GO:0005737(cytoplasm);GO:0005794(Golgi apparatus);GO:0005829(cytosol);GO:0005886(plasma membrane);GO:0006887(exocytosis);GO:0007268(chemical synaptic transmission);GO:0007528(neuromuscular junction development);GO:0010808(positive regulation of syn…	04721(Synaptic vesicle cycle);04721(Synaptic vesicle cycle)	K15293	NA	unc-13 homolog B [Source:MGI Symbol;Acc:MGI:1342278]	protein_coding;retained_intron;processed_transcript	2.56542	2.58852	1.74017	3.10116	2.85981	3.79713	0.7065	-0.501238	0.0190918	1	down	no
ENSMUSG00000114547	Gm3226	ENSMUST00000225150	NA	NA	NA	NA	predicted gene 3226 [Source:MGI Symbol;Acc:MGI:3804968]	processed_pseudogene	25.3478	29.7037	35.3168	44.7395	38.1769	46.6345	0.69755	-0.519631	0.0193374	1	down	no
ENSMUSG00000023505	Cdca3	ENSMUST00000134637;ENSMUST00000024270;ENSMUST00000151674;ENSMUST00000131847;ENSMUST00000150120;ENSMUST00000136692	GO:0003674(molecular_function);GO:0005737(cytoplasm);GO:0005829(cytosol);GO:0005912(adherens junction);GO:0007049(cell cycle);GO:0016567(protein ubiquitination);GO:0051301(cell division);GO:0051301(cell division)	NA	NA	NA	cell division cycle associated 3 [Source:MGI Symbol;Acc:MGI:1315198]	retained_intron;protein_coding	7.85726	6.31683	8.15109	10.908	8.85253	15.5829	0.631665	-0.662769	0.0193445	1	down	no
ENSMUSG00000037991	Rmi2	ENSMUST00000037913;ENSMUST00000181721	GO:0003674(molecular_function);GO:0003677(DNA binding);GO:0005634(nucleus);GO:0005829(cytosol);GO:0006260(DNA replication);GO:0006281(DNA repair);GO:0016607(nuclear speck);GO:0033045(regulation of sister chromatid segregation);GO:0043007(maintenance of rDNA);GO:2000042(negative regulation of double-strand break repair via homologous recombination);GO:2000042(negative regulation of double-strand b…	03460(Fanconi anemia pathway);03460(Fanconi anemia pathway)	K15365	NA	RecQ mediated genome instability 2 [Source:MGI Symbol;Acc:MGI:2685383]	protein_coding;nonsense_mediated_decay	0.671664	0.707295	0.687547	1.28141	1.21453	1.32999	0.540132	-0.888616	0.019403	1	down	no
ENSMUSG00000037461	Ints7	ENSMUST00000194785;ENSMUST00000193961;ENSMUST00000045450;ENSMUST00000194877;ENSMUST00000192681;ENSMUST00000193569	GO:0000077(DNA damage checkpoint);GO:0005634(nucleus);GO:0005694(chromosome);GO:0005737(cytoplasm);GO:0016180(snRNA processing);GO:0016604(nuclear body);GO:0032039(integrator complex);GO:0071479(cellular response to ionizing radiation);GO:0071479(cellular response to ionizing radiation)	NA	K13144	NA	integrator complex subunit 7 [Source:MGI Symbol;Acc:MGI:1924315]	nonsense_mediated_decay;retained_intron;protein_coding	5.17293	5.19058	6.13395	6.81964	9.24585	7.40942	0.70277	-0.508876	0.0205186	1	down	no
ENSMUSG00000064345	mt-Nd2	ENSMUST00000082396	GO:0005739(mitochondrion);GO:0005743(mitochondrial inner membrane);GO:0005747(mitochondrial respiratory chain complex I);GO:0006120(mitochondrial electron transport, NADH to ubiquinone);GO:0008137(NADH dehydrogenase (ubiquinone) activity);GO:0014069(postsynaptic density);GO:0016020(membrane);GO:0016021(integral component of membrane);GO:0016491(oxidoreductase activity);GO:0019901(protein kinase b…	00190(Oxidative phosphorylation);04714(Thermogenesis);04723(Retrograde endocannabinoid signaling);05012(Parkinson disease)	K03879	EC:7.1.1.2	mitochondrially encoded NADH dehydrogenase 2 [Source:MGI Symbol;Acc:MGI:102500]	protein_coding	1517.56	1494.35	1670.84	1189.15	993.812	1049.77	1.44854	0.534602	0.0206386	1	up	no
ENSMUSG00000064341	mt-Nd1	ENSMUST00000082392	GO:0005739(mitochondrion);GO:0005743(mitochondrial inner membrane);GO:0005747(mitochondrial respiratory chain complex I);GO:0008137(NADH dehydrogenase (ubiquinone) activity);GO:0009060(aerobic respiration);GO:0014070(response to organic cyclic compound);GO:0016020(membrane);GO:0016021(integral component of membrane);GO:0016491(oxidoreductase activity);GO:0030425(dendrite);GO:0031966(mitochondrial…	00190(Oxidative phosphorylation);04714(Thermogenesis);04723(Retrograde endocannabinoid signaling);05012(Parkinson disease)	K03878	EC:7.1.1.2	mitochondrially encoded NADH dehydrogenase 1 [Source:MGI Symbol;Acc:MGI:101787]	protein_coding	2710.36	2436.23	2602.08	1880.66	1560.7	1925.51	1.4438	0.529867	0.0207684	1	up	no
ENSMUSG00000046179	E2f8	ENSMUST00000119223;ENSMUST00000058745;ENSMUST00000151139;ENSMUST00000136142	GO:0000122(negative regulation of transcription by RNA polymerase II);GO:0000978(RNA polymerase II cis-regulatory region sequence-specific DNA binding);GO:0000981(DNA-binding transcription factor activity, RNA polymerase II-specific);GO:0000987(cis-regulatory region sequence-specific DNA binding);GO:0001217(DNA-binding transcription repressor activity);GO:0001227(DNA-binding transcription repress…	NA	K09391	NA	E2F transcription factor 8 [Source:MGI Symbol;Acc:MGI:1922038]	protein_coding;retained_intron	1.58189	1.80962	1.67976	2.3785	2.45636	3.66216	0.596829	-0.74461	0.0208718	1	down	no
ENSMUSG00000078578	Ube2d3	ENSMUST00000106291;ENSMUST00000197539;ENSMUST00000197859;ENSMUST00000166033;ENSMUST00000199613;ENSMUST00000196248;ENSMUST00000196564;ENSMUST00000198748;ENSMUST00000196878;ENSMUST00000199582;ENSMUST00000197814;ENSMUST00000198685;ENSMUST00000197134;ENSMUST00000196446;ENSMUST00000196591;ENSMUST00000197357	GO:0000166(nucleotide binding);GO:0000209(protein polyubiquitination);GO:0004842(ubiquitin-protein transferase activity);GO:0005515(protein binding);GO:0005524(ATP binding);GO:0005634(nucleus);GO:0005768(endosome);GO:0005886(plasma membrane);GO:0006281(DNA repair);GO:0006511(ubiquitin-dependent protein catabolic process);GO:0006513(protein monoubiquitination);GO:0006915(apoptotic process);GO:0006…	04120(Ubiquitin mediated proteolysis);04141(Protein processing in endoplasmic reticulum);04141(Protein processing in endoplasmic reticulum)	K06689	EC:2.3.2.23	ubiquitin-conjugating enzyme E2D 3 [Source:MGI Symbol;Acc:MGI:1913355]	protein_coding;retained_intron;nonsense_mediated_decay;processed_transcript	8.24526	9.49776	10.7493	6.08409	7.0612	6.59465	1.44338	0.529454	0.021193	1	up	no
ENSMUSG00000025538	Sumf2	ENSMUST00000201029;ENSMUST00000153063;ENSMUST00000171300;ENSMUST00000201874;ENSMUST00000122826;ENSMUST00000137357	GO:0005515(protein binding);GO:0005783(endoplasmic reticulum);GO:0005788(endoplasmic reticulum lumen);GO:0008150(biological_process);GO:0042802(identical protein binding);GO:0046872(metal ion binding);GO:0046872(metal ion binding)	NA	NA	NA	sulfatase modifying factor 2 [Source:MGI Symbol;Acc:MGI:1915152]	processed_transcript;protein_coding;nonsense_mediated_decay	7.64985	8.09996	7.94818	10.1792	10.576	15.3177	0.656947	-0.606152	0.0214179	1	down	no
ENSMUSG00000074643	Cpne1	ENSMUST00000142975;ENSMUST00000109607;ENSMUST00000109608;ENSMUST00000079312;ENSMUST00000136296;ENSMUST00000126513;ENSMUST00000183733;ENSMUST00000184152;ENSMUST00000140109;ENSMUST00000184265;ENSMUST00000142960;ENSMUST00000183353;ENSMUST00000153634;ENSMUST00000147627;ENSMUST00000184933;ENSMUST00000133921;ENSMUST00000147956;ENSMUST00000154889	GO:0001786(phosphatidylserine binding);GO:0004175(endopeptidase activity);GO:0005509(calcium ion binding);GO:0005515(protein binding);GO:0005544(calcium-dependent phospholipid binding);GO:0005634(nucleus);GO:0005654(nucleoplasm);GO:0005737(cytoplasm);GO:0005829(cytosol);GO:0005886(plasma membrane);GO:0006508(proteolysis);GO:0010629(negative regulation of gene expression);GO:0016020(membrane);GO:0…	NA	NA	NA	copine I [Source:MGI Symbol;Acc:MGI:2386621]	retained_intron;protein_coding;processed_transcript;nonsense_mediated_decay	12.4223	15.1072	16.387	5.9065	13.821	7.33169	1.62298	0.698646	0.021459	1	up	no
ENSMUSG00000041219	Arhgap11a	ENSMUST00000110948;ENSMUST00000102545;ENSMUST00000110947;ENSMUST00000110949	GO:0003674(molecular_function);GO:0005096(GTPase activator activity);GO:0007165(signal transduction);GO:0043547(positive regulation of GTPase activity);GO:0043547(positive regulation of GTPase activity)	NA	K20635	NA	Rho GTPase activating protein 11A [Source:MGI Symbol;Acc:MGI:2444300]	protein_coding	3.81378	3.05385	2.96422	4.38756	4.26413	6.90869	0.631851	-0.662344	0.021461	1	down	no
ENSMUSG00000069014	Gm5641	ENSMUST00000198699;ENSMUST00000091130	NA	NA	NA	NA	predicted gene 5641 [Source:MGI Symbol;Acc:MGI:3645731]	transcribed_processed_pseudogene;processed_transcript	15.9966	5.25823	22.1637	33.1513	19.8832	31.5953	0.513039	-0.962858	0.0215394	1	down	no
ENSMUSG00000092274	Neat1	ENSMUST00000173672;ENSMUST00000174829;ENSMUST00000174287;ENSMUST00000232969	NA	NA	NA	NA	nuclear paraspeckle assembly transcript 1 (non-protein coding) [Source:MGI Symbol;Acc:MGI:1914211]	lincRNA	16.0984	17.1349	19.6028	11.5174	13.461	11.6757	1.44148	0.527546	0.0221404	1	up	no
ENSMUSG00000032679	Cd59a	ENSMUST00000040423;ENSMUST00000153312;ENSMUST00000168176	GO:0001848(complement binding);GO:0001971(negative regulation of activation of membrane attack complex);GO:0005886(plasma membrane);GO:0009897(external side of plasma membrane);GO:0009986(cell surface);GO:0016020(membrane);GO:0016525(negative regulation of angiogenesis);GO:0030449(regulation of complement activation);GO:0030948(negative regulation of vascular endothelial growth factor receptor si…	04610(Complement and coagulation cascades);04640(Hematopoietic cell lineage);04640(Hematopoietic cell lineage)	K04008	NA	CD59a antigen [Source:MGI Symbol;Acc:MGI:109177]	protein_coding;processed_transcript	5.51952	5.45221	3.71473	7.41137	6.74954	10.6441	0.592076	-0.756145	0.0225965	1	down	no
ENSMUSG00000031891	Hsd11b2	ENSMUST00000034363	GO:0001666(response to hypoxia);GO:0002017(regulation of blood volume by renal aldosterone);GO:0003845(11-beta-hydroxysteroid dehydrogenase [NAD(P)] activity);GO:0005496(steroid binding);GO:0005737(cytoplasm);GO:0005783(endoplasmic reticulum);GO:0007565(female pregnancy);GO:0008211(glucocorticoid metabolic process);GO:0016491(oxidoreductase activity);GO:0032094(response to food);GO:0032868(respon…	00140(Steroid hormone biosynthesis);04960(Aldosterone-regulated sodium reabsorption)	K00071	EC:1.1.1.-	hydroxysteroid 11-beta dehydrogenase 2 [Source:MGI Symbol;Acc:MGI:104720]	protein_coding	32.1351	45.1995	23.5781	43.431	43.3958	59.0845	0.691603	-0.531984	0.0225998	1	down	no
ENSMUSG00000052512	Nav2	ENSMUST00000184155;ENSMUST00000064395;ENSMUST00000184109;ENSMUST00000184544;ENSMUST00000207743;ENSMUST00000183659;ENSMUST00000183531;ENSMUST00000184928;ENSMUST00000184809;ENSMUST00000183715;ENSMUST00000184955;ENSMUST00000184124;ENSMUST00000184462;ENSMUST00000064383;ENSMUST00000184102;ENSMUST00000184471;ENSMUST00000184336;ENSMUST00000184945	GO:0003025(regulation of systemic arterial blood pressure by baroreceptor feedback);GO:0005515(protein binding);GO:0005614(interstitial matrix);GO:0005654(nucleoplasm);GO:0007399(nervous system development);GO:0007605(sensory perception of sound);GO:0007608(sensory perception of smell);GO:0007626(locomotory behavior);GO:0008201(heparin binding);GO:0021554(optic nerve development);GO:0021563(gloss…	NA	K19483	EC:3.6.4.12	neuron navigator 2 [Source:MGI Symbol;Acc:MGI:2183691]	processed_transcript;protein_coding;retained_intron;nonsense_mediated_decay	1.23473	1.3922	0.999281	1.85039	1.37445	1.90266	0.707209	-0.499791	0.022866	1	down	no
ENSMUSG00000031099	Smarca1	ENSMUST00000101616;ENSMUST00000088973;ENSMUST00000141084;ENSMUST00000077569;ENSMUST00000153548;ENSMUST00000153587;ENSMUST00000140756	GO:0000166(nucleotide binding);GO:0000733(DNA strand renaturation);GO:0000790(nuclear chromatin);GO:0003676(nucleic acid binding);GO:0003677(DNA binding);GO:0003682(chromatin binding);GO:0004386(helicase activity);GO:0005524(ATP binding);GO:0005634(nucleus);GO:0005654(nucleoplasm);GO:0006325(chromatin organization);GO:0006338(chromatin remodeling);GO:0006355(regulation of transcription, DNA-templ…	NA	K11727	EC:3.6.4.-	SWI/SNF related, matrix associated, actin dependent regulator of chromatin, subfamily a, member 1 [Source:MGI Symbol;Acc:MGI:1935127]	protein_coding;processed_transcript	19.7374	15.1191	16.6133	10.588	14.0735	10.8653	1.44876	0.534816	0.0230584	1	up	no
ENSMUSG00000010064	Slc38a3	ENSMUST00000194895;ENSMUST00000167868;ENSMUST00000191923;ENSMUST00000195033;ENSMUST00000010208;ENSMUST00000193932;ENSMUST00000177567;ENSMUST00000193495;ENSMUST00000192323;ENSMUST00000192990;ENSMUST00000194230;ENSMUST00000192211;ENSMUST00000195739;ENSMUST00000195843	GO:0003333(amino acid transmembrane transport);GO:0005290(L-histidine transmembrane transporter activity);GO:0005886(plasma membrane);GO:0005887(integral component of plasma membrane);GO:0006811(ion transport);GO:0006814(sodium ion transport);GO:0006865(amino acid transport);GO:0006867(asparagine transport);GO:0006868(glutamine transport);GO:0007420(brain development);GO:0007565(female pregnancy)…	04724(Glutamatergic synapse);04727(GABAergic synapse);04964(Proximal tubule bicarbonate reclamation);04964(Proximal tubule bicarbonate reclamation)	K13576	NA	solute carrier family 38, member 3 [Source:MGI Symbol;Acc:MGI:1923507]	retained_intron;protein_coding;processed_transcript;nonsense_mediated_decay	16.1137	18.1595	13.5333	20.6896	18.9615	27.004	0.717222	-0.479508	0.0233862	1	down	no
ENSMUSG00000009035	Tmem184b	ENSMUST00000074991;ENSMUST00000228002;ENSMUST00000228472;ENSMUST00000229049;ENSMUST00000178522;ENSMUST00000231076;ENSMUST00000229003;ENSMUST00000226929	GO:0016020(membrane);GO:0016021(integral component of membrane);GO:0016021(integral component of membrane)	NA	NA	NA	transmembrane protein 184b [Source:MGI Symbol;Acc:MGI:2445179]	protein_coding;retained_intron	4.70481	4.41654	4.13123	4.82104	4.22446	16.3162	0.522543	-0.93638	0.0237554	1	down	no
ENSMUSG00000028278	Rragd	ENSMUST00000098190;ENSMUST00000029946;ENSMUST00000136792;ENSMUST00000084747	GO:0000166(nucleotide binding);GO:0003924(GTPase activity);GO:0005525(GTP binding);GO:0005634(nucleus);GO:0005654(nucleoplasm);GO:0005737(cytoplasm);GO:0005764(lysosome);GO:0005813(centrosome);GO:0019003(GDP binding);GO:0032008(positive regulation of TOR signaling);GO:0046982(protein heterodimerization activity);GO:0051020(GTPase binding);GO:0071230(cellular response to amino acid stimulus);GO:00…	04140(Autophagy - animal);04150(mTOR signaling pathway);04150(mTOR signaling pathway)	K16186	NA	Ras-related GTP binding D [Source:MGI Symbol;Acc:MGI:1098604]	protein_coding;processed_transcript	4.97419	6.08509	8.45065	2.4736	4.2715	4.98884	1.66269	0.733521	0.0237667	1	up	no
ENSMUSG00000009418	Nav1	ENSMUST00000067414;ENSMUST00000190298;ENSMUST00000190130;ENSMUST00000187311;ENSMUST00000189252;ENSMUST00000040599;ENSMUST00000112103;ENSMUST00000190735;ENSMUST00000189362	GO:0001578(microtubule bundle formation);GO:0001764(neuron migration);GO:0005737(cytoplasm);GO:0005856(cytoskeleton);GO:0005874(microtubule);GO:0007275(multicellular organism development);GO:0007399(nervous system development);GO:0015630(microtubule cytoskeleton);GO:0022008(neurogenesis);GO:0030154(cell differentiation);GO:0043194(axon initial segment);GO:0043194(axon initial segment)	NA	K16776	NA	neuron navigator 1 [Source:MGI Symbol;Acc:MGI:2183683]	protein_coding;processed_transcript;retained_intron	2.9833	3.85752	2.18799	2.1187	1.84574	2.07791	1.49426	0.579428	0.0238765	1	up	no
ENSMUSG00000028702	Rad54l	ENSMUST00000102704;ENSMUST00000139147;ENSMUST00000102705;ENSMUST00000143089;ENSMUST00000152741;ENSMUST00000138320	GO:0000166(nucleotide binding);GO:0000724(double-strand break repair via homologous recombination);GO:0000733(DNA strand renaturation);GO:0003677(DNA binding);GO:0004386(helicase activity);GO:0005524(ATP binding);GO:0005634(nucleus);GO:0005654(nucleoplasm);GO:0006281(DNA repair);GO:0006302(double-strand break repair);GO:0006974(cellular response to DNA damage stimulus);GO:0007131(reciprocal meiot…	03440(Homologous recombination);03440(Homologous recombination)	K10875	EC:3.6.4.-	RAD54 like (S. cerevisiae) [Source:MGI Symbol;Acc:MGI:894697]	protein_coding;processed_transcript	2.58026	2.12612	1.73522	3.00182	2.67902	4.55268	0.62946	-0.667812	0.0239096	1	down	no
ENSMUSG00000053477	Tcf4	ENSMUST00000114980;ENSMUST00000146908;ENSMUST00000202116;ENSMUST00000078486;ENSMUST00000114985;ENSMUST00000114977;ENSMUST00000114978;ENSMUST00000200813;ENSMUST00000202435;ENSMUST00000202458;ENSMUST00000209174;ENSMUST00000201410;ENSMUST00000201094;ENSMUST00000201781;ENSMUST00000201157;ENSMUST00000201081;ENSMUST00000128706;ENSMUST00000066717;ENSMUST00000200921;ENSMUST00000201747;ENSMUST00000202074;…	GO:0000122(negative regulation of transcription by RNA polymerase II);GO:0000790(nuclear chromatin);GO:0000978(RNA polymerase II cis-regulatory region sequence-specific DNA binding);GO:0000981(DNA-binding transcription factor activity, RNA polymerase II-specific);GO:0001093(TFIIB-class transcription factor binding);GO:0001228(DNA-binding transcription activator activity, RNA polymerase II-specifi…	NA	NA	NA	transcription factor 4 [Source:MGI Symbol;Acc:MGI:98506]	protein_coding;retained_intron;processed_transcript;nonsense_mediated_decay	0.819696	1.87014	1.94886	2.30511	2.75816	2.25169	0.634139	-0.657129	0.0241604	1	down	no
ENSMUSG00000020893	Per1	ENSMUST00000021271;ENSMUST00000101004;ENSMUST00000102605;ENSMUST00000132462;ENSMUST00000166748;ENSMUST00000142392	GO:0000122(negative regulation of transcription by RNA polymerase II);GO:0000976(transcription regulatory region sequence-specific DNA binding);GO:0000978(RNA polymerase II cis-regulatory region sequence-specific DNA binding);GO:0001222(transcription corepressor binding);GO:0002028(regulation of sodium ion transport);GO:0005515(protein binding);GO:0005634(nucleus);GO:0005654(nucleoplasm);GO:00057…	04710(Circadian rhythm);04713(Circadian entrainment);04713(Circadian entrainment)	K21944	NA	period circadian clock 1 [Source:MGI Symbol;Acc:MGI:1098283]	protein_coding;nonsense_mediated_decay	21.6241	10.2343	13.1781	10.3867	8.23531	10.464	1.54839	0.630769	0.0242437	1	up	no
ENSMUSG00000031601	Cnot7	ENSMUST00000135269;ENSMUST00000149992;ENSMUST00000142455;ENSMUST00000132740;ENSMUST00000034012;ENSMUST00000144970;ENSMUST00000132200;ENSMUST00000139558;ENSMUST00000128237;ENSMUST00000146280;ENSMUST00000132032	GO:0000175(3'-5'-exoribonuclease activity);GO:0000289(nuclear-transcribed mRNA poly(A) tail shortening);GO:0000290(deadenylation-dependent decapping of nuclear-transcribed mRNA);GO:0000932(P-body);GO:0003676(nucleic acid binding);GO:0003714(transcription corepressor activity);GO:0003723(RNA binding);GO:0004518(nuclease activity);GO:0004527(exonuclease activity);GO:0004532(exoribonuclease activity…	03018(RNA degradation);03018(RNA degradation)	K12581	NA	CCR4-NOT transcription complex, subunit 7 [Source:MGI Symbol;Acc:MGI:1298230]	protein_coding;processed_transcript;retained_intron	13.4677	17.132	12.1778	6.89718	7.08782	13.7991	1.53964	0.622592	0.0247362	1	up	no
ENSMUSG00000064368	mt-Nd6	ENSMUST00000082419	GO:0005739(mitochondrion);GO:0008137(NADH dehydrogenase (ubiquinone) activity);GO:0016020(membrane);GO:0016021(integral component of membrane);GO:0016491(oxidoreductase activity);GO:0031966(mitochondrial membrane);GO:0035094(response to nicotine);GO:0042220(response to cocaine);GO:0042542(response to hydrogen peroxide);GO:0055114(oxidation-reduction process);GO:0070469(respirasome)	00190(Oxidative phosphorylation);04714(Thermogenesis);04723(Retrograde endocannabinoid signaling);05012(Parkinson disease)	K03884	EC:7.1.1.2	mitochondrially encoded NADH dehydrogenase 6 [Source:MGI Symbol;Acc:MGI:102495]	protein_coding	1232.97	1136.11	1099.69	808.956	777.236	859.557	1.41829	0.504148	0.0248213	1	up	no
ENSMUSG00000027281	Slx4ip	ENSMUST00000099311;ENSMUST00000130856;ENSMUST00000141463;ENSMUST00000028737;ENSMUST00000135260;ENSMUST00000180277	GO:0003674(molecular_function);GO:0005575(cellular_component);GO:0008150(biological_process);GO:0008150(biological_process)	NA	NA	NA	SLX4 interacting protein [Source:MGI Symbol;Acc:MGI:1921493]	protein_coding;processed_transcript	1.07564	0.876919	0.871522	1.22167	2.15383	1.60911	0.566559	-0.819701	0.0248901	1	down	no
ENSMUSG00000021697	Depdc1b	ENSMUST00000051594;ENSMUST00000163307;ENSMUST00000172402;ENSMUST00000167413;ENSMUST00000171178;ENSMUST00000168037	GO:0003674(molecular_function);GO:0005096(GTPase activator activity);GO:0007165(signal transduction);GO:0016477(cell migration);GO:0030177(positive regulation of Wnt signaling pathway);GO:0035556(intracellular signal transduction);GO:0043547(positive regulation of GTPase activity);GO:0043547(positive regulation of GTPase activity)	NA	NA	NA	DEP domain containing 1B [Source:MGI Symbol;Acc:MGI:2145425]	protein_coding;nonsense_mediated_decay;retained_intron;processed_transcript	0.695298	0.561683	0.842516	1.25607	1.04877	1.80672	0.510632	-0.969645	0.0255959	1	down	no
ENSMUSG00000041193	Pla2g5	ENSMUST00000102512;ENSMUST00000140117;ENSMUST00000102511;ENSMUST00000102513;ENSMUST00000136393;ENSMUST00000154844;ENSMUST00000030524;ENSMUST00000127183;ENSMUST00000140100	GO:0004623(phospholipase A2 activity);GO:0005509(calcium ion binding);GO:0005576(extracellular region);GO:0005794(Golgi apparatus);GO:0005886(plasma membrane);GO:0006629(lipid metabolic process);GO:0006644(phospholipid metabolic process);GO:0006663(platelet activating factor biosynthetic process);GO:0008201(heparin binding);GO:0016042(lipid catabolic process);GO:0016787(hydrolase activity);GO:001…	00564(Glycerophospholipid metabolism);00565(Ether lipid metabolism);00590(Arachidonic acid metabolism);00591(Linoleic acid metabolism);00592(alpha-Linolenic acid metabolism);04014(Ras signaling pathway);04270(Vascular smooth muscle contraction);04972(Pancreatic secretion);04975(Fat digestion and absorption);04975(Fat digestion and absorption)	K01047	EC:3.1.1.4	phospholipase A2, group V [Source:MGI Symbol;Acc:MGI:101899]	protein_coding;processed_transcript	14.838	17.4273	14.6881	12.3454	4.18854	10.515	1.73587	0.795657	0.0257531	1	up	no
ENSMUSG00000030894	Tpp1	ENSMUST00000210840;ENSMUST00000033184;ENSMUST00000210395;ENSMUST00000210066;ENSMUST00000211204;ENSMUST00000210730;ENSMUST00000211560;ENSMUST00000211659;ENSMUST00000210018;ENSMUST00000211226	GO:0004175(endopeptidase activity);GO:0004252(serine-type endopeptidase activity);GO:0005515(protein binding);GO:0005739(mitochondrion);GO:0005764(lysosome);GO:0005794(Golgi apparatus);GO:0006508(proteolysis);GO:0007040(lysosome organization);GO:0007399(nervous system development);GO:0007417(central nervous system development);GO:0008233(peptidase activity);GO:0008236(serine-type peptidase activi…	04142(Lysosome);04142(Lysosome)	K01279	EC:3.4.14.9	tripeptidyl peptidase I [Source:MGI Symbol;Acc:MGI:1336194]	retained_intron;protein_coding;nonsense_mediated_decay;processed_transcript	27.7613	17.0658	25.1804	14.7948	16.6598	16.442	1.46164	0.547585	0.0258438	1	up	no
ENSMUSG00000066245	Gm10156	ENSMUST00000122364	NA	NA	NA	NA	predicted gene 10156 [Source:MGI Symbol;Acc:MGI:3642344]	processed_pseudogene	18.306	24.8769	22.8684	13.0884	11.3374	13.094	1.76044	0.815935	0.0261764	1	up	no
ENSMUSG00000043336	Filip1l	ENSMUST00000159414;ENSMUST00000159816;ENSMUST00000099667	GO:0003674(molecular_function);GO:0005575(cellular_component);GO:0005634(nucleus);GO:0005737(cytoplasm);GO:0008150(biological_process);GO:0016020(membrane);GO:0016020(membrane)	NA	NA	NA	filamin A interacting protein 1-like [Source:MGI Symbol;Acc:MGI:1925999]	protein_coding	8.28438	6.84772	5.23537	3.74584	4.29622	5.1643	1.54225	0.625034	0.0262157	1	up	no
ENSMUSG00000078502	Gm13212	ENSMUST00000105739;ENSMUST00000097794;ENSMUST00000119718	GO:0003676(nucleic acid binding);GO:0006355(regulation of transcription, DNA-templated);GO:0046872(metal ion binding);GO:0046872(metal ion binding)	05168(Herpes simplex virus 1 infection);05168(Herpes simplex virus 1 infection)	K09228	NA	predicted gene 13212 [Source:MGI Symbol;Acc:MGI:3651014]	protein_coding	1.88612	1.11027	1.02786	0.514761	0.741706	0.756999	1.99867	0.999039	0.0265397	1	up	no
ENSMUSG00000028195	Ccn1	ENSMUST00000029846	GO:0001649(osteoblast differentiation);GO:0001934(positive regulation of protein phosphorylation);GO:0002041(intussusceptive angiogenesis);GO:0003181(atrioventricular valve morphogenesis);GO:0003278(apoptotic process involved in heart morphogenesis);GO:0003281(ventricular septum development);GO:0005178(integrin binding);GO:0005515(protein binding);GO:0005520(insulin-like growth factor binding);GO…	NA	K06829	NA	cellular communication network factor 1 [Source:MGI Symbol;Acc:MGI:88613]	protein_coding	59.4979	14.7489	49.0967	21.3533	24.613	22.7291	1.79551	0.844397	0.0268711	1	up	no
ENSMUSG00000019944	Rhobtb1	ENSMUST00000020101;ENSMUST00000164876;ENSMUST00000067908;ENSMUST00000172261;ENSMUST00000163760;ENSMUST00000169569;ENSMUST00000164034;ENSMUST00000165765;ENSMUST00000167384;ENSMUST00000167286;ENSMUST00000164212;ENSMUST00000168117;ENSMUST00000163497	GO:0000166(nucleotide binding);GO:0003924(GTPase activity);GO:0005515(protein binding);GO:0005525(GTP binding);GO:0005737(cytoplasm);GO:0005856(cytoskeleton);GO:0005886(plasma membrane);GO:0005938(cell cortex);GO:0007015(actin filament organization);GO:0007264(small GTPase mediated signal transduction);GO:0008360(regulation of cell shape);GO:0019901(protein kinase binding);GO:0030036(actin cytosk…	04120(Ubiquitin mediated proteolysis);04120(Ubiquitin mediated proteolysis)	K07868	NA	Rho-related BTB domain containing 1 [Source:MGI Symbol;Acc:MGI:1916538]	protein_coding;retained_intron;processed_transcript;nonsense_mediated_decay	11.1469	21.4651	11.5141	17.8695	22.8241	24.3777	0.678119	-0.560389	0.027167	1	down	no
ENSMUSG00000048327	Ckap2l	ENSMUST00000052708	GO:0000922(spindle pole);GO:0003674(molecular_function);GO:0005737(cytoplasm);GO:0005813(centrosome);GO:0005829(cytosol);GO:0005856(cytoskeleton);GO:0008150(biological_process);GO:0072686(mitotic spindle)	NA	K16769	NA	cytoskeleton associated protein 2-like [Source:MGI Symbol;Acc:MGI:1917716]	protein_coding	7.19923	5.84985	6.09481	8.7141	7.31812	13.6901	0.64409	-0.634665	0.0274958	1	down	no
ENSMUSG00000064369	mt-Te	ENSMUST00000082420	NA	NA	NA	NA	mitochondrially encoded tRNA glutamic acid [Source:MGI Symbol;Acc:MGI:102488]	Mt_tRNA	395.407	326.592	340.61	244.281	209.24	223.396	1.56978	0.650561	0.0275501	1	up	no
ENSMUSG00000036534	Slc38a7	ENSMUST00000212270;ENSMUST00000153835;ENSMUST00000040481;ENSMUST00000212628;ENSMUST00000142881	GO:0003333(amino acid transmembrane transport);GO:0005290(L-histidine transmembrane transporter activity);GO:0005313(L-glutamate transmembrane transporter activity);GO:0006811(ion transport);GO:0006814(sodium ion transport);GO:0006865(amino acid transport);GO:0006867(asparagine transport);GO:0006868(glutamine transport);GO:0015171(amino acid transmembrane transporter activity);GO:0015179(L-amino …	NA	K14994	NA	solute carrier family 38, member 7 [Source:MGI Symbol;Acc:MGI:2679005]	protein_coding;retained_intron	4.95267	6.09023	6.14932	11.8413	10.6091	5.12505	0.623462	-0.681627	0.0275547	1	down	no
ENSMUSG00000093726	Gm20667	ENSMUST00000175674	NA	NA	NA	NA	predicted gene 20667 [Source:MGI Symbol;Acc:MGI:5313114]	sense_overlapping	1.10547	0.92624	0.849783	1.46532	1.84641	2.18859	0.523878	-0.932698	0.0278435	1	down	no
ENSMUSG00000031604	Msmo1	ENSMUST00000132013;ENSMUST00000034015;ENSMUST00000135943;ENSMUST00000140861;ENSMUST00000147419;ENSMUST00000145216;ENSMUST00000141021	GO:0000254(C-4 methylsterol oxidase activity);GO:0005506(iron ion binding);GO:0005783(endoplasmic reticulum);GO:0005789(endoplasmic reticulum membrane);GO:0006629(lipid metabolic process);GO:0006694(steroid biosynthetic process);GO:0006695(cholesterol biosynthetic process);GO:0008202(steroid metabolic process);GO:0008203(cholesterol metabolic process);GO:0008610(lipid biosynthetic process);GO:001…	00100(Steroid biosynthesis);00100(Steroid biosynthesis)	K07750	EC:1.14.18.9	methylsterol monoxygenase 1 [Source:MGI Symbol;Acc:MGI:1913484]	retained_intron;protein_coding;processed_transcript	30.5428	23.8185	39.0856	25.5268	18.3092	17.7595	1.51711	0.601322	0.0279297	1	up	no
ENSMUSG00000044595	Dnd1	ENSMUST00000061522;ENSMUST00000155827;ENSMUST00000124038	GO:0003676(nucleic acid binding);GO:0003723(RNA binding);GO:0003729(mRNA binding);GO:0003730(mRNA 3'-UTR binding);GO:0005515(protein binding);GO:0005634(nucleus);GO:0005737(cytoplasm);GO:0007275(multicellular organism development);GO:0007281(germ cell development);GO:0048255(mRNA stabilization);GO:0060965(negative regulation of gene silencing by miRNA);GO:0061158(3'-UTR-mediated mRNA destabilizat…	NA	NA	NA	DND microRNA-mediated repression inhibitor 1 [Source:MGI Symbol;Acc:MGI:2447763]	protein_coding;retained_intron	1.3075	1.1971	1.36164	2.74708	2.02897	2.23338	0.551576	-0.858368	0.0281258	1	down	no
ENSMUSG00000005886	Ncoa2	ENSMUST00000006037;ENSMUST00000068304;ENSMUST00000133232;ENSMUST00000143603;ENSMUST00000124088;ENSMUST00000139970;ENSMUST00000147927;ENSMUST00000185275;ENSMUST00000081713;ENSMUST00000145280;ENSMUST00000146784	GO:0000122(negative regulation of transcription by RNA polymerase II);GO:0000978(RNA polymerase II cis-regulatory region sequence-specific DNA binding);GO:0001162(RNA polymerase II intronic transcription regulatory region sequence-specific DNA binding);GO:0003682(chromatin binding);GO:0003713(transcription coactivator activity);GO:0005102(signaling receptor binding);GO:0005515(protein binding);GO…	04915(Estrogen signaling pathway);04919(Thyroid hormone signaling pathway);04919(Thyroid hormone signaling pathway)	K11255	NA	nuclear receptor coactivator 2 [Source:MGI Symbol;Acc:MGI:1276533]	protein_coding;retained_intron;processed_transcript	4.8172	3.59863	3.17847	1.30556	1.48696	3.95396	1.71857	0.78121	0.02824	1	up	no
ENSMUSG00000028927	Padi2	ENSMUST00000030765;ENSMUST00000148160;ENSMUST00000130958	GO:0004668(protein-arginine deiminase activity);GO:0005509(calcium ion binding);GO:0005634(nucleus);GO:0005737(cytoplasm);GO:0010848(regulation of chromatin disassembly);GO:0016787(hydrolase activity);GO:0018101(protein citrullination);GO:0030331(estrogen receptor binding);GO:0030520(intracellular estrogen receptor signaling pathway);GO:0035327(transcriptionally active chromatin);GO:0036413(histo…	NA	K01481	EC:3.5.3.15	peptidyl arginine deiminase, type II [Source:MGI Symbol;Acc:MGI:1338892]	protein_coding;processed_transcript	0.281144	0.377071	0.261745	0.775639	0.592006	0.460833	0.503129	-0.991	0.028286	1	down	no
ENSMUSG00000114277	Gm48583	ENSMUST00000225897	NA	NA	NA	NA	predicted gene, 48583 [Source:MGI Symbol;Acc:MGI:6098152]	processed_pseudogene	35.9869	59.7294	45.5856	27.9391	23.3661	28.24	1.77637	0.828935	0.0286874	1	up	no
ENSMUSG00000006471	Ndor1	ENSMUST00000100329;ENSMUST00000114349;ENSMUST00000123472;ENSMUST00000148589;ENSMUST00000132128;ENSMUST00000137355;ENSMUST00000141808;ENSMUST00000147866;ENSMUST00000129705;ENSMUST00000132591	GO:0003958(NADPH-hemoprotein reductase activity);GO:0005654(nucleoplasm);GO:0005737(cytoplasm);GO:0005829(cytosol);GO:0008219(cell death);GO:0010181(FMN binding);GO:0016226(iron-sulfur cluster assembly);GO:0016491(oxidoreductase activity);GO:0016651(oxidoreductase activity, acting on NAD(P)H);GO:0016709(oxidoreductase activity, acting on paired donors, with incorporation or reduction of molecular…	NA	NA	NA	NADPH dependent diflavin oxidoreductase 1 [Source:MGI Symbol;Acc:MGI:1926047]	protein_coding;retained_intron;nonsense_mediated_decay;processed_transcript	3.18065	8.01081	4.91288	2.75733	3.69558	3.09595	1.68652	0.754048	0.0294611	1	up	no
ENSMUSG00000064360	mt-Nd3	ENSMUST00000082411	GO:0005739(mitochondrion);GO:0005747(mitochondrial respiratory chain complex I);GO:0006979(response to oxidative stress);GO:0008137(NADH dehydrogenase (ubiquinone) activity);GO:0009642(response to light intensity);GO:0009725(response to hormone);GO:0016020(membrane);GO:0016021(integral component of membrane);GO:0016491(oxidoreductase activity);GO:0030964(NADH dehydrogenase complex);GO:0031966(mit…	00190(Oxidative phosphorylation);04714(Thermogenesis);04723(Retrograde endocannabinoid signaling);05012(Parkinson disease)	K03880	EC:7.1.1.2	mitochondrially encoded NADH dehydrogenase 3 [Source:MGI Symbol;Acc:MGI:102499]	protein_coding	738.51	751.315	725.799	465.984	507.561	609.665	1.39945	0.48486	0.0297213	1	up	no
ENSMUSG00000020808	Pimreg	ENSMUST00000021164;ENSMUST00000133880;ENSMUST00000125655;ENSMUST00000127369;ENSMUST00000122871	GO:0003674(molecular_function);GO:0005634(nucleus);GO:0005654(nucleoplasm);GO:0005730(nucleolus);GO:0007049(cell cycle);GO:0051301(cell division);GO:0051301(cell division)	NA	NA	NA	PICALM interacting mitotic regulator [Source:MGI Symbol;Acc:MGI:1924434]	protein_coding;processed_transcript	5.73924	5.64764	6.54069	8.743	7.13062	12.0045	0.643069	-0.636954	0.0301166	1	down	no
ENSMUSG00000001018	Snapin	ENSMUST00000184877;ENSMUST00000107351;ENSMUST00000107352;ENSMUST00000149884;ENSMUST00000185005	GO:0000139(Golgi membrane);GO:0000149(SNARE binding);GO:0005515(protein binding);GO:0005737(cytoplasm);GO:0005764(lysosome);GO:0005765(lysosomal membrane);GO:0005794(Golgi apparatus);GO:0005829(cytosol);GO:0006886(intracellular protein transport);GO:0006887(exocytosis);GO:0007040(lysosome organization);GO:0007042(lysosomal lumen acidification);GO:0007268(chemical synaptic transmission);GO:0008021…	NA	K20002	NA	SNAP-associated protein [Source:MGI Symbol;Acc:MGI:1333745]	nonsense_mediated_decay;retained_intron;protein_coding	39.2804	21.5268	16.851	12.8527	19.0561	17.0456	1.58634	0.665699	0.0305796	1	up	no
ENSMUSG00000028161	Ppp3ca	ENSMUST00000070198;ENSMUST00000196170;ENSMUST00000124206;ENSMUST00000130114;ENSMUST00000130768;ENSMUST00000196603;ENSMUST00000056758;ENSMUST00000124777	GO:0000082(G1/S transition of mitotic cell cycle);GO:0001975(response to amphetamine);GO:0004721(phosphoprotein phosphatase activity);GO:0004722(protein serine/threonine phosphatase activity);GO:0004723(calcium-dependent protein serine/threonine phosphatase activity);GO:0005515(protein binding);GO:0005516(calmodulin binding);GO:0005634(nucleus);GO:0005654(nucleoplasm);GO:0005737(cytoplasm);GO:000…	04010(MAPK signaling pathway);04020(Calcium signaling pathway);04022(cGMP-PKG signaling pathway);04114(Oocyte meiosis);04218(Cellular senescence);04310(Wnt signaling pathway);04360(Axon guidance);04370(VEGF signaling pathway);04380(Osteoclast differentiation);04625(C-type lectin receptor signaling pathway);04650(Natural killer cell mediated cytotoxicity);04658(Th1 and Th2 cell differentiation);04…	K04348	EC:3.1.3.16	protein phosphatase 3, catalytic subunit, alpha isoform [Source:MGI Symbol;Acc:MGI:107164]	protein_coding;retained_intron;processed_transcript	7.18463	6.09519	7.87467	3.6889	5.06264	5.95457	1.43848	0.524547	0.0307991	1	up	no
ENSMUSG00000054611	Kdm2a	ENSMUST00000075856;ENSMUST00000047898;ENSMUST00000176653;ENSMUST00000175978;ENSMUST00000235335;ENSMUST00000176483;ENSMUST00000176532;ENSMUST00000176495;ENSMUST00000237268;ENSMUST00000116571;ENSMUST00000176497;ENSMUST00000175682;ENSMUST00000175959;ENSMUST00000175777	GO:0003677(DNA binding);GO:0005515(protein binding);GO:0005634(nucleus);GO:0006303(double-strand break repair via nonhomologous end joining);GO:0006325(chromatin organization);GO:0008270(zinc ion binding);GO:0010944(negative regulation of transcription by competitive promoter binding);GO:0016491(oxidoreductase activity);GO:0032922(circadian regulation of gene expression);GO:0042752(regulation of …	NA	K10276	EC:1.14.11.27	lysine (K)-specific demethylase 2A [Source:MGI Symbol;Acc:MGI:1354736]	protein_coding;retained_intron;nonsense_mediated_decay;processed_transcript	8.61419	8.87491	8.21624	8.45518	3.48291	3.5889	1.65553	0.72729	0.0309661	1	up	no
ENSMUSG00000068101	Cenpm	ENSMUST00000089157;ENSMUST00000089155;ENSMUST00000229041;ENSMUST00000229505;ENSMUST00000230408;ENSMUST00000229747	GO:0000775(chromosome, centromeric region);GO:0000776(kinetochore);GO:0000777(condensed chromosome kinetochore);GO:0003674(molecular_function);GO:0005634(nucleus);GO:0005694(chromosome);GO:0005737(cytoplasm);GO:0005829(cytosol);GO:0008150(biological_process);GO:0008150(biological_process)	NA	NA	NA	centromere protein M [Source:MGI Symbol;Acc:MGI:1913820]	protein_coding;processed_transcript	6.54667	5.79296	5.31657	8.39655	8.98955	10.562	0.631751	-0.662572	0.0310266	1	down	no
ENSMUSG00000037058	Paip2	ENSMUST00000235400;ENSMUST00000041314;ENSMUST00000236414;ENSMUST00000235211;ENSMUST00000238138;ENSMUST00000236868;ENSMUST00000237730;ENSMUST00000236666;ENSMUST00000235476;ENSMUST00000235210;ENSMUST00000236020	GO:0000900(translation repressor activity, mRNA regulatory element binding);GO:0003729(mRNA binding);GO:0005737(cytoplasm);GO:0006417(regulation of translation);GO:0007283(spermatogenesis);GO:0007613(memory);GO:0008143(poly(A) binding);GO:0017148(negative regulation of translation);GO:0030371(translation repressor activity);GO:0045947(negative regulation of translational initiation);GO:1900271(re…	NA	NA	NA	polyadenylate-binding protein-interacting protein 2 [Source:MGI Symbol;Acc:MGI:1915119]	protein_coding;retained_intron	38.6563	42.4101	37.5231	18.8788	36.0355	25.7911	1.46941	0.555237	0.0313323	1	up	no
ENSMUSG00000030978	Rrm1	ENSMUST00000033283;ENSMUST00000211720;ENSMUST00000210751;ENSMUST00000211786;ENSMUST00000211493;ENSMUST00000209630;ENSMUST00000210543	GO:0000166(nucleotide binding);GO:0000278(mitotic cell cycle);GO:0003824(catalytic activity);GO:0004748(ribonucleoside-diphosphate reductase activity, thioredoxin disulfide as acceptor);GO:0005515(protein binding);GO:0005524(ATP binding);GO:0005635(nuclear envelope);GO:0005737(cytoplasm);GO:0005829(cytosol);GO:0005971(ribonucleoside-diphosphate reductase complex);GO:0006206(pyrimidine nucleobase …	00230(Purine metabolism);00240(Pyrimidine metabolism);00480(Glutathione metabolism);00983(Drug metabolism - other enzymes);00983(Drug metabolism - other enzymes)	K10807	EC:1.17.4.1	ribonucleotide reductase M1 [Source:MGI Symbol;Acc:MGI:98180]	protein_coding;nonsense_mediated_decay;retained_intron	8.55863	7.2392	8.12679	9.68726	10.1922	12.6776	0.734853	-0.444473	0.0313953	1	down	no
ENSMUSG00000029177	Cenpa	ENSMUST00000197962;ENSMUST00000133316;ENSMUST00000144742;ENSMUST00000134372;ENSMUST00000199617;ENSMUST00000134846;ENSMUST00000199320;ENSMUST00000149759;ENSMUST00000031073;ENSMUST00000150810	GO:0000132(establishment of mitotic spindle orientation);GO:0000281(mitotic cytokinesis);GO:0000775(chromosome, centromeric region);GO:0000776(kinetochore);GO:0000777(condensed chromosome kinetochore);GO:0000778(condensed nuclear chromosome kinetochore);GO:0000780(condensed nuclear chromosome, centromeric region);GO:0000786(nucleosome);GO:0000788(nuclear nucleosome);GO:0000939(condensed chromosom…	NA	K11495	NA	centromere protein A [Source:MGI Symbol;Acc:MGI:88375]	retained_intron;nonsense_mediated_decay;protein_coding	4.48341	3.61389	4.04493	6.47996	4.08692	7.88656	0.657993	-0.603856	0.0313999	1	down	no
ENSMUSG00000032180	Tmed1	ENSMUST00000034698;ENSMUST00000214576;ENSMUST00000213316;ENSMUST00000213167;ENSMUST00000214285	GO:0005783(endoplasmic reticulum);GO:0005789(endoplasmic reticulum membrane);GO:0005793(endoplasmic reticulum-Golgi intermediate compartment);GO:0005794(Golgi apparatus);GO:0005886(plasma membrane);GO:0006886(intracellular protein transport);GO:0006888(endoplasmic reticulum to Golgi vesicle-mediated transport);GO:0007030(Golgi organization);GO:0015031(protein transport);GO:0016020(membrane);GO:00…	NA	NA	NA	transmembrane p24 trafficking protein 1 [Source:MGI Symbol;Acc:MGI:106201]	protein_coding;nonsense_mediated_decay;retained_intron	18.9067	21.2021	18.611	34.6167	18.1327	35.3494	0.666522	-0.585276	0.0314214	1	down	no
ENSMUSG00000051285	Pcmtd1	ENSMUST00000182892;ENSMUST00000061280;ENSMUST00000182114;ENSMUST00000182675;ENSMUST00000182306;ENSMUST00000182823;ENSMUST00000182388;ENSMUST00000183204	GO:0004719(protein-L-isoaspartate (D-aspartate) O-methyltransferase activity);GO:0005737(cytoplasm);GO:0006464(cellular protein modification process);GO:0006479(protein methylation);GO:0008168(methyltransferase activity);GO:0016020(membrane);GO:0016740(transferase activity);GO:0032259(methylation);GO:0032259(methylation)	NA	NA	NA	protein-L-isoaspartate (D-aspartate) O-methyltransferase domain containing 1 [Source:MGI Symbol;Acc:MGI:2441773]	retained_intron;protein_coding;nonsense_mediated_decay;processed_transcript	7.24898	6.68635	6.71131	4.11579	2.39914	6.30852	1.61007	0.687123	0.0314841	1	up	no
ENSMUSG00000047921	Trappc9	ENSMUST00000170633;ENSMUST00000089770;ENSMUST00000230025;ENSMUST00000023276;ENSMUST00000228960;ENSMUST00000230270	GO:0005515(protein binding);GO:0005737(cytoplasm);GO:0005783(endoplasmic reticulum);GO:0005794(Golgi apparatus);GO:0005802(trans-Golgi network);GO:0021987(cerebral cortex development);GO:0030008(TRAPP complex);GO:0030154(cell differentiation);GO:0030182(neuron differentiation);GO:0051092(positive regulation of NF-kappaB transcription factor activity);GO:0051092(positive regulation of NF-kappaB tr…	NA	K20306	NA	trafficking protein particle complex 9 [Source:MGI Symbol;Acc:MGI:1923760]	protein_coding;retained_intron;processed_transcript	8.09517	7.56919	5.85476	9.1448	9.55683	10.124	0.746526	-0.421735	0.0317605	1	down	no
ENSMUSG00000024420	Zfp521	ENSMUST00000234410;ENSMUST00000025288;ENSMUST00000234237;ENSMUST00000234523;ENSMUST00000234502;ENSMUST00000234025;ENSMUST00000234480	GO:0003676(nucleic acid binding);GO:0003677(DNA binding);GO:0005634(nucleus);GO:0005654(nucleoplasm);GO:0007275(multicellular organism development);GO:0010468(regulation of gene expression);GO:0019904(protein domain specific binding);GO:0030154(cell differentiation);GO:0046872(metal ion binding);GO:0048663(neuron fate commitment);GO:0048663(neuron fate commitment)	NA	NA	NA	zinc finger protein 521 [Source:MGI Symbol;Acc:MGI:95459]	protein_coding;processed_transcript;retained_intron;nonsense_mediated_decay	1.63928	1.91053	2.09903	1.11392	1.23156	1.01894	1.679	0.7476	0.0319266	1	up	no
ENSMUSG00000022033	Pbk	ENSMUST00000022612;ENSMUST00000152130;ENSMUST00000139644	GO:0000165(MAPK cascade);GO:0000166(nucleotide binding);GO:0000187(activation of MAPK activity);GO:0000278(mitotic cell cycle);GO:0001933(negative regulation of protein phosphorylation);GO:0004672(protein kinase activity);GO:0004674(protein serine/threonine kinase activity);GO:0004708(MAP kinase kinase activity);GO:0005524(ATP binding);GO:0005634(nucleus);GO:0006468(protein phosphorylation);GO:00…	NA	K08865	EC:2.7.12.2	PDZ binding kinase [Source:MGI Symbol;Acc:MGI:1289156]	protein_coding;processed_transcript	13.2549	8.96006	10.27	15.0296	14.0354	19.8362	0.664299	-0.590096	0.0320764	1	down	no
ENSMUSG00000028106	Rprd2	ENSMUST00000090791;ENSMUST00000198740;ENSMUST00000200164;ENSMUST00000197449;ENSMUST00000200428;ENSMUST00000198741	GO:0000993(RNA polymerase II complex binding);GO:0016591(RNA polymerase II, holoenzyme);GO:0031124(mRNA 3'-end processing);GO:0031124(mRNA 3'-end processing)	NA	NA	NA	regulation of nuclear pre-mRNA domain containing 2 [Source:MGI Symbol;Acc:MGI:1922387]	protein_coding;retained_intron;processed_transcript	2.32752	3.13487	1.83614	2.58425	5.06752	3.47964	0.655669	-0.60896	0.032552	1	down	no
ENSMUSG00000054640	Slc8a1	ENSMUST00000234923;ENSMUST00000234131;ENSMUST00000163123;ENSMUST00000163680;ENSMUST00000235015;ENSMUST00000086538	GO:0001666(response to hypoxia);GO:0002028(regulation of sodium ion transport);GO:0005432(calcium:sodium antiporter activity);GO:0005516(calmodulin binding);GO:0005654(nucleoplasm);GO:0005739(mitochondrion);GO:0005874(microtubule);GO:0005886(plasma membrane);GO:0005887(integral component of plasma membrane);GO:0006811(ion transport);GO:0006814(sodium ion transport);GO:0006816(calcium ion transpor…	04020(Calcium signaling pathway);04022(cGMP-PKG signaling pathway);04260(Cardiac muscle contraction);04261(Adrenergic signaling in cardiomyocytes);04371(Apelin signaling pathway);04740(Olfactory transduction);04961(Endocrine and other factor-regulated calcium reabsorption);04974(Protein digestion and absorption);04978(Mineral absorption);05410(Hypertrophic cardiomyopathy (HCM));05412(Arrhythmogen…	K05849	NA	solute carrier family 8 (sodium/calcium exchanger), member 1 [Source:MGI Symbol;Acc:MGI:107956]	protein_coding	0.777034	1.23894	1.23505	1.33485	1.6571	1.977	0.654266	-0.61205	0.0326198	1	down	no
ENSMUSG00000074657	Kif5a	ENSMUST00000099172;ENSMUST00000217895;ENSMUST00000218298	GO:0000166(nucleotide binding);GO:0000932(P-body);GO:0003777(microtubule motor activity);GO:0005515(protein binding);GO:0005524(ATP binding);GO:0005737(cytoplasm);GO:0005829(cytosol);GO:0005856(cytoskeleton);GO:0005871(kinesin complex);GO:0005874(microtubule);GO:0007018(microtubule-based movement);GO:0007411(axon guidance);GO:0008017(microtubule binding);GO:0008574(ATP-dependent microtubule motor…	04144(Endocytosis);04728(Dopaminergic synapse);04728(Dopaminergic synapse)	K10396	NA	kinesin family member 5A [Source:MGI Symbol;Acc:MGI:109564]	protein_coding;nonsense_mediated_decay	1.64687	2.24408	1.43066	0.871797	0.993128	1.24808	1.70947	0.773553	0.0328629	1	up	no
ENSMUSG00000041842	Fhdc1	ENSMUST00000091002;ENSMUST00000107689;ENSMUST00000125643;ENSMUST00000194027;ENSMUST00000131065	GO:0003779(actin binding);GO:0005515(protein binding);GO:0005794(Golgi apparatus);GO:0005874(microtubule);GO:0005881(cytoplasmic microtubule);GO:0005929(cilium);GO:0008017(microtubule binding);GO:0030030(cell projection organization);GO:0042995(cell projection);GO:0043149(stress fiber assembly);GO:0060271(cilium assembly);GO:0090161(Golgi ribbon formation);GO:0090161(Golgi ribbon formation)	NA	NA	NA	FH2 domain containing 1 [Source:MGI Symbol;Acc:MGI:2684972]	protein_coding;retained_intron;processed_transcript	16.5804	5.05017	7.95195	11.9001	15.9392	21.7788	0.596204	-0.746123	0.032876	1	down	no
ENSMUSG00000039988	Ankrd13c	ENSMUST00000040787;ENSMUST00000199727;ENSMUST00000199757;ENSMUST00000198736;ENSMUST00000197872;ENSMUST00000164582;ENSMUST00000199574;ENSMUST00000200516;ENSMUST00000199008;ENSMUST00000196480	GO:0005102(signaling receptor binding);GO:0005515(protein binding);GO:0005737(cytoplasm);GO:0005783(endoplasmic reticulum);GO:0005789(endoplasmic reticulum membrane);GO:0006621(protein retention in ER lumen);GO:0010869(regulation of receptor biosynthetic process);GO:0016020(membrane);GO:0048471(perinuclear region of cytoplasm);GO:2000209(regulation of anoikis);GO:2000209(regulation of anoikis)	NA	K21437	NA	ankyrin repeat domain 13c [Source:MGI Symbol;Acc:MGI:2139746]	protein_coding;nonsense_mediated_decay;retained_intron;processed_transcript	2.14895	3.0662	3.44534	1.85106	1.67305	2.09973	1.53996	0.622892	0.0329401	1	up	no
ENSMUSG00000026620	Mark1	ENSMUST00000027929;ENSMUST00000192657	GO:0000166(nucleotide binding);GO:0000226(microtubule cytoskeleton organization);GO:0000287(magnesium ion binding);GO:0001764(neuron migration);GO:0001786(phosphatidylserine binding);GO:0004672(protein kinase activity);GO:0004674(protein serine/threonine kinase activity);GO:0005524(ATP binding);GO:0005546(phosphatidylinositol-4,5-bisphosphate binding);GO:0005737(cytoplasm);GO:0005856(cytoskeleton…	NA	K08798	EC:2.7.11.1	MAP/microtubule affinity regulating kinase 1 [Source:MGI Symbol;Acc:MGI:2664902]	protein_coding	25.8948	23.0156	21.8532	26.4523	30.6985	39.6432	0.731075	-0.451909	0.0332299	1	down	no
ENSMUSG00000052144	Ppp4r2	ENSMUST00000203580;ENSMUST00000204001;ENSMUST00000063854;ENSMUST00000203067;ENSMUST00000203940	GO:0019888(protein phosphatase regulator activity);GO:0030289(protein phosphatase 4 complex);GO:0043666(regulation of phosphoprotein phosphatase activity);GO:0043666(regulation of phosphoprotein phosphatase activity)	NA	K15425	NA	protein phosphatase 4, regulatory subunit 2 [Source:MGI Symbol;Acc:MGI:3027896]	protein_coding;retained_intron	4.05239	9.52148	4.32003	8.00109	9.00964	10.1459	0.658915	-0.601836	0.0334156	1	down	no
ENSMUSG00000039601	Rcan2	ENSMUST00000044792;ENSMUST00000229744;ENSMUST00000044895;ENSMUST00000228972;ENSMUST00000229939;ENSMUST00000177857;ENSMUST00000229240	GO:0003676(nucleic acid binding);GO:0005737(cytoplasm);GO:0006979(response to oxidative stress);GO:0007219(Notch signaling pathway);GO:0007614(short-term memory);GO:0008597(calcium-dependent protein serine/threonine phosphatase regulator activity);GO:0019722(calcium-mediated signaling);GO:0031987(locomotion involved in locomotory behavior);GO:0033173(calcineurin-NFAT signaling cascade);GO:0043666…	04919(Thyroid hormone signaling pathway);04919(Thyroid hormone signaling pathway)	K17903	NA	regulator of calcineurin 2 [Source:MGI Symbol;Acc:MGI:1858219]	protein_coding	4.96901	3.64144	7.30683	3.90449	2.60302	2.98873	1.67617	0.745164	0.0336058	1	up	no
ENSMUSG00000000058	Cav2	ENSMUST00000000058;ENSMUST00000115462;ENSMUST00000115459	GO:0000139(Golgi membrane);GO:0000149(SNARE binding);GO:0001937(negative regulation of endothelial cell proliferation);GO:0001938(positive regulation of endothelial cell proliferation);GO:0002080(acrosomal membrane);GO:0002095(caveolar macromolecular signaling complex);GO:0005634(nucleus);GO:0005635(nuclear envelope);GO:0005637(nuclear inner membrane);GO:0005737(cytoplasm);GO:0005783(endoplasmic …	04144(Endocytosis);04510(Focal adhesion);05100(Bacterial invasion of epithelial cells);05205(Proteoglycans in cancer);05418(Fluid shear stress and atherosclerosis);05418(Fluid shear stress and atherosclerosis)	K12958	NA	caveolin 2 [Source:MGI Symbol;Acc:MGI:107571]	protein_coding	7.94835	6.08604	4.53224	3.06976	3.8101	4.47962	1.63446	0.708814	0.0338346	1	up	no
ENSMUSG00000022378	Fam49b	ENSMUST00000228226;ENSMUST00000063838;ENSMUST00000164532;ENSMUST00000227118;ENSMUST00000226675;ENSMUST00000228908;ENSMUST00000227024;ENSMUST00000226129	GO:0001916(positive regulation of T cell mediated cytotoxicity);GO:0005515(protein binding);GO:0005739(mitochondrion);GO:0005929(cilium);GO:0016020(membrane);GO:0023030(MHC class Ib protein binding, via antigen binding groove);GO:0030334(regulation of cell migration);GO:0030833(regulation of actin filament polymerization);GO:0030837(negative regulation of actin filament polymerization);GO:0031267…	NA	NA	NA	family with sequence similarity 49, member B [Source:MGI Symbol;Acc:MGI:1923520]	protein_coding;retained_intron	3.57695	4.25725	3.12475	4.12463	4.65326	6.43515	0.720365	-0.473199	0.0340174	1	down	no
ENSMUSG00000026622	Nek2	ENSMUST00000126446;ENSMUST00000027931;ENSMUST00000150839;ENSMUST00000136733	GO:0000070(mitotic sister chromatid segregation);GO:0000166(nucleotide binding);GO:0000775(chromosome, centromeric region);GO:0000776(kinetochore);GO:0000777(condensed chromosome kinetochore);GO:0000794(condensed nuclear chromosome);GO:0000922(spindle pole);GO:0001824(blastocyst development);GO:0004672(protein kinase activity);GO:0004674(protein serine/threonine kinase activity);GO:0005515(protei…	NA	K20872	EC:2.7.11.1	NIMA (never in mitosis gene a)-related expressed kinase 2 [Source:MGI Symbol;Acc:MGI:109359]	retained_intron;protein_coding;processed_transcript	3.20515	3.09265	2.8379	4.10191	3.6682	6.47994	0.6411	-0.64138	0.0341978	1	down	no
ENSMUSG00000074415	Mir100hg	ENSMUST00000181814;ENSMUST00000181296;ENSMUST00000233719;ENSMUST00000232959;ENSMUST00000233968;ENSMUST00000233833;ENSMUST00000233256;ENSMUST00000233321;ENSMUST00000233934;ENSMUST00000232715;ENSMUST00000233873;ENSMUST00000233926;ENSMUST00000233001;ENSMUST00000232773;ENSMUST00000233107;ENSMUST00000232901;ENSMUST00000233277;ENSMUST00000190109;ENSMUST00000233563;ENSMUST00000232964;ENSMUST00000233927;…	NA	NA	NA	NA	Mir100 Mirlet7a-2 Mir125b-1 cluster host gene [Source:MGI Symbol;Acc:MGI:1920394]	lincRNA;retained_intron;processed_transcript	1.24292	1.10848	0.670639	0.638457	0.452354	0.747172	1.64422	0.717401	0.0343696	1	up	no
ENSMUSG00000053119	Chmp3	ENSMUST00000059462;ENSMUST00000204199;ENSMUST00000128382;ENSMUST00000132917;ENSMUST00000142169;ENSMUST00000065364;ENSMUST00000204535;ENSMUST00000127774	GO:0000815(ESCRT III complex);GO:0005546(phosphatidylinositol-4,5-bisphosphate binding);GO:0005737(cytoplasm);GO:0005768(endosome);GO:0005769(early endosome);GO:0005770(late endosome);GO:0005771(multivesicular body);GO:0005829(cytosol);GO:0005886(plasma membrane);GO:0007034(vacuolar transport);GO:0007049(cell cycle);GO:0008333(endosome to lysosome transport);GO:0010824(regulation of centrosome du…	04144(Endocytosis);04217(Necroptosis);04217(Necroptosis)	K12193	NA	charged multivesicular body protein 3 [Source:MGI Symbol;Acc:MGI:1913950]	protein_coding;retained_intron;nonsense_mediated_decay;processed_transcript	8.63664	8.83212	29.0209	6.76306	9.72953	8.93737	1.82815	0.870381	0.0349535	1	up	no
ENSMUSG00000034903	Cobll1	ENSMUST00000112430;ENSMUST00000090896;ENSMUST00000155916;ENSMUST00000102726;ENSMUST00000136537;ENSMUST00000156643;ENSMUST00000124769;ENSMUST00000155082;ENSMUST00000155768;ENSMUST00000112429;ENSMUST00000132478;ENSMUST00000112431;ENSMUST00000132979	GO:0003785(actin monomer binding);GO:0003785(actin monomer binding)	NA	NA	NA	Cobl-like 1 [Source:MGI Symbol;Acc:MGI:2442894]	protein_coding;processed_transcript	7.38512	7.39945	10.7544	6.02595	6.08531	5.76821	1.4284	0.514397	0.0349821	1	up	no
ENSMUSG00000039130	Zc3hc1	ENSMUST00000152101;ENSMUST00000102992;ENSMUST00000080812;ENSMUST00000115184;ENSMUST00000202393;ENSMUST00000126945;ENSMUST00000138983;ENSMUST00000152391;ENSMUST00000147990;ENSMUST00000136255;ENSMUST00000129796	GO:0005515(protein binding);GO:0005634(nucleus);GO:0005654(nucleoplasm);GO:0007049(cell cycle);GO:0008270(zinc ion binding);GO:0016567(protein ubiquitination);GO:0019901(protein kinase binding);GO:0031965(nuclear membrane);GO:0042025(host cell nucleus);GO:0046872(metal ion binding);GO:0051301(cell division);GO:2001240(negative regulation of extrinsic apoptotic signaling pathway in absence of liga…	NA	NA	NA	zinc finger, C3HC type 1 [Source:MGI Symbol;Acc:MGI:1916023]	retained_intron;protein_coding;processed_transcript;nonsense_mediated_decay	3.70939	3.3935	3.59775	5.63841	4.55427	5.5292	0.680621	-0.555076	0.0356048	1	down	no
ENSMUSG00000020653	Klf11	ENSMUST00000020982;ENSMUST00000139940;ENSMUST00000144046;ENSMUST00000146894	GO:0000083(regulation of transcription involved in G1/S transition of mitotic cell cycle);GO:0000122(negative regulation of transcription by RNA polymerase II);GO:0000976(transcription regulatory region sequence-specific DNA binding);GO:0000981(DNA-binding transcription factor activity, RNA polymerase II-specific);GO:0003676(nucleic acid binding);GO:0003677(DNA binding);GO:0003700(DNA-binding tra…	NA	K09209	NA	Kruppel-like factor 11 [Source:MGI Symbol;Acc:MGI:2653368]	protein_coding	13.9741	9.69588	9.89303	6.71849	8.57609	7.81413	1.4524	0.538436	0.035704	1	up	no
ENSMUSG00000041431	Ccnb1	ENSMUST00000091295;ENSMUST00000072119;ENSMUST00000147790;ENSMUST00000134080;ENSMUST00000128279;ENSMUST00000174038;ENSMUST00000142056	GO:0000079(regulation of cyclin-dependent protein serine/threonine kinase activity);GO:0000278(mitotic cell cycle);GO:0000307(cyclin-dependent protein kinase holoenzyme complex);GO:0000922(spindle pole);GO:0000942(condensed nuclear chromosome outer kinetochore);GO:0001556(oocyte maturation);GO:0001701(in utero embryonic development);GO:0001933(negative regulation of protein phosphorylation);GO:00…	04068(FoxO signaling pathway);04110(Cell cycle);04114(Oocyte meiosis);04115(p53 signaling pathway);04218(Cellular senescence);04914(Progesterone-mediated oocyte maturation);05170(Human immunodeficiency virus 1 infection);05170(Human immunodeficiency virus 1 infection)	K05868	NA	cyclin B1 [Source:MGI Symbol;Acc:MGI:88302]	protein_coding;retained_intron	7.58675	7.06628	6.50004	8.17651	8.39475	14.4815	0.681197	-0.553855	0.0357732	1	down	no
ENSMUSG00000038233	Gask1a	ENSMUST00000043011;ENSMUST00000215990;ENSMUST00000214536;ENSMUST00000213773	GO:0003674(molecular_function);GO:0005576(extracellular region);GO:0005783(endoplasmic reticulum);GO:0005794(Golgi apparatus);GO:0005901(caveola);GO:0008150(biological_process);GO:0016020(membrane);GO:0043231(intracellular membrane-bounded organelle);GO:0043231(intracellular membrane-bounded organelle)	NA	NA	NA	golgi associated kinase 1A [Source:MGI Symbol;Acc:MGI:3041196]	protein_coding	0.995871	0.940627	0.852605	1.28549	1.66022	1.9108	0.574303	-0.800116	0.0360443	1	down	no
ENSMUSG00000116174	Gm10362	ENSMUST00000229262	NA	NA	NA	NA	predicted gene 10362 [Source:MGI Symbol;Acc:MGI:3642619]	processed_pseudogene	39.1255	43.5611	66.2272	20.7753	16.03	47.0662	1.7755	0.828224	0.0360767	1	up	no
ENSMUSG00000020493	Prr11	ENSMUST00000051395	GO:0003674(molecular_function);GO:0005634(nucleus);GO:0005737(cytoplasm);GO:0007050(cell cycle arrest);GO:0051726(regulation of cell cycle)	NA	NA	NA	proline rich 11 [Source:MGI Symbol;Acc:MGI:2444496]	protein_coding	4.19085	3.65774	3.7065	5.16695	4.65182	7.92448	0.651238	-0.618743	0.0362391	1	down	no
ENSMUSG00000041859	Mcm3	ENSMUST00000053266;ENSMUST00000188112;ENSMUST00000191061;ENSMUST00000185296;ENSMUST00000190421	GO:0000166(nucleotide binding);GO:0000727(double-strand break repair via break-induced replication);GO:0003677(DNA binding);GO:0003678(DNA helicase activity);GO:0003688(DNA replication origin binding);GO:0003697(single-stranded DNA binding);GO:0004386(helicase activity);GO:0005524(ATP binding);GO:0005634(nucleus);GO:0005654(nucleoplasm);GO:0005737(cytoplasm);GO:0005813(centrosome);GO:0006260(DNA …	03030(DNA replication);04110(Cell cycle);04110(Cell cycle)	K02541	EC:3.6.4.12	minichromosome maintenance complex component 3 [Source:MGI Symbol;Acc:MGI:101845]	protein_coding;retained_intron	17.0793	14.0365	14.0095	19.5945	17.7978	22.9997	0.747208	-0.420418	0.0363266	1	down	no
ENSMUSG00000047638	Nr1h4	ENSMUST00000105297;ENSMUST00000058126;ENSMUST00000105296	GO:0000122(negative regulation of transcription by RNA polymerase II);GO:0000790(nuclear chromatin);GO:0000976(transcription regulatory region sequence-specific DNA binding);GO:0000977(RNA polymerase II regulatory region sequence-specific DNA binding);GO:0000978(RNA polymerase II cis-regulatory region sequence-specific DNA binding);GO:0000981(DNA-binding transcription factor activity, RNA polymer…	04976(Bile secretion);04976(Bile secretion)	K08537	NA	nuclear receptor subfamily 1, group H, member 4 [Source:MGI Symbol;Acc:MGI:1352464]	protein_coding	2.29404	4.22534	3.76714	2.59753	1.0429	1.60522	1.96096	0.97156	0.0365673	1	up	no
ENSMUSG00000046550	Spin2c	ENSMUST00000049999;ENSMUST00000123264;ENSMUST00000148708	GO:0005634(nucleus);GO:0005654(nucleoplasm);GO:0005829(cytosol);GO:0006355(regulation of transcription, DNA-templated);GO:0007049(cell cycle);GO:0007276(gamete generation);GO:0035064(methylated histone binding);GO:0051726(regulation of cell cycle);GO:0051726(regulation of cell cycle)	NA	NA	NA	spindlin family, member 2C [Source:MGI Symbol;Acc:MGI:3605548]	protein_coding	14.4484	14.7188	10.6112	18.7813	18.0238	21.4559	0.682762	-0.550545	0.0371362	1	down	no
ENSMUSG00000019214	Chtf18	ENSMUST00000170575;ENSMUST00000237158;ENSMUST00000168914;ENSMUST00000048054;ENSMUST00000167940;ENSMUST00000169767;ENSMUST00000168060;ENSMUST00000170070	GO:0003689(DNA clamp loader activity);GO:0005524(ATP binding);GO:0005654(nucleoplasm);GO:0005829(cytosol);GO:0017116(single-stranded DNA helicase activity);GO:0031390(Ctf18 RFC-like complex);GO:0032508(DNA duplex unwinding);GO:1900264(positive regulation of DNA-directed DNA polymerase activity);GO:1900264(positive regulation of DNA-directed DNA polymerase activity)	NA	K11269	NA	CTF18, chromosome transmission fidelity factor 18 [Source:MGI Symbol;Acc:MGI:2384887]	nonsense_mediated_decay;retained_intron;protein_coding	2.23177	2.16518	2.03501	3.20985	2.83268	3.85415	0.64991	-0.621687	0.0374846	1	down	no
ENSMUSG00000030409	Dmpk	ENSMUST00000135839;ENSMUST00000137219;ENSMUST00000132115;ENSMUST00000154199;ENSMUST00000148472;ENSMUST00000238982;ENSMUST00000143938;ENSMUST00000140742;ENSMUST00000108473;ENSMUST00000148380;ENSMUST00000142725;ENSMUST00000152050;ENSMUST00000147215;ENSMUST00000149188;ENSMUST00000128422;ENSMUST00000032568;ENSMUST00000122999;ENSMUST00000108474;ENSMUST00000126264	GO:0000166(nucleotide binding);GO:0002028(regulation of sodium ion transport);GO:0004672(protein kinase activity);GO:0004674(protein serine/threonine kinase activity);GO:0005515(protein binding);GO:0005524(ATP binding);GO:0005634(nucleus);GO:0005640(nuclear outer membrane);GO:0005737(cytoplasm);GO:0005739(mitochondrion);GO:0005741(mitochondrial outer membrane);GO:0005783(endoplasmic reticulum);GO…	NA	K08788	EC:2.7.11.1	dystrophia myotonica-protein kinase [Source:MGI Symbol;Acc:MGI:94906]	retained_intron;processed_transcript;nonsense_mediated_decay;protein_coding	12.0677	11.8374	11.8584	8.06571	9.8962	7.32218	1.41447	0.500261	0.0377096	1	up	no
ENSMUSG00000061665	Cd2ap	ENSMUST00000024709;ENSMUST00000233350;ENSMUST00000233626;ENSMUST00000233195;ENSMUST00000233123;ENSMUST00000233476	GO:0001650(fibrillar center);GO:0001726(ruffle);GO:0005172(vascular endothelial growth factor receptor binding);GO:0005515(protein binding);GO:0005737(cytoplasm);GO:0005829(cytosol);GO:0005856(cytoskeleton);GO:0005886(plasma membrane);GO:0005911(cell-cell junction);GO:0005938(cell cortex);GO:0007015(actin filament organization);GO:0007049(cell cycle);GO:0008013(beta-catenin binding);GO:0008022(pr…	05100(Bacterial invasion of epithelial cells);05100(Bacterial invasion of epithelial cells)	K13738	NA	CD2-associated protein [Source:MGI Symbol;Acc:MGI:1330281]	protein_coding;retained_intron	6.0674	4.97075	4.97198	3.46858	3.85761	4.37845	1.36784	0.451905	0.0377807	1	up	no
ENSMUSG00000060063	Alox5ap	ENSMUST00000071130;ENSMUST00000202629;ENSMUST00000200806;ENSMUST00000200928	GO:0002540(leukotriene production involved in inflammatory response);GO:0002675(positive regulation of acute inflammatory response);GO:0004051(arachidonate 5-lipoxygenase activity);GO:0004364(glutathione transferase activity);GO:0004464(leukotriene-C4 synthase activity);GO:0004602(glutathione peroxidase activity);GO:0005515(protein binding);GO:0005634(nucleus);GO:0005635(nuclear envelope);GO:0005…	04664(Fc epsilon RI signaling pathway);04664(Fc epsilon RI signaling pathway)	NA	NA	arachidonate 5-lipoxygenase activating protein [Source:MGI Symbol;Acc:MGI:107505]	protein_coding;processed_transcript	3.23927	4.9091	4.52727	5.13123	8.05018	8.2849	0.59049	-0.760015	0.0379857	1	down	no
ENSMUSG00000037071	Scd1	ENSMUST00000041331;ENSMUST00000235741;ENSMUST00000236824	GO:0004768(stearoyl-CoA 9-desaturase activity);GO:0005506(iron ion binding);GO:0005730(nucleolus);GO:0005783(endoplasmic reticulum);GO:0005789(endoplasmic reticulum membrane);GO:0006629(lipid metabolic process);GO:0006631(fatty acid metabolic process);GO:0006633(fatty acid biosynthetic process);GO:0006636(unsaturated fatty acid biosynthetic process);GO:0006641(triglyceride metabolic process);GO:0…	01040(Biosynthesis of unsaturated fatty acids);03320(PPAR signaling pathway);04152(AMPK signaling pathway);04152(AMPK signaling pathway)	K00507	EC:1.14.19.1	stearoyl-Coenzyme A desaturase 1 [Source:MGI Symbol;Acc:MGI:98239]	protein_coding;processed_transcript	12.786	13.7934	20.278	14.1191	8.28749	8.12222	1.53486	0.618104	0.0379913	1	up	no
ENSMUSG00000020265	Sumo3	ENSMUST00000099538;ENSMUST00000020501;ENSMUST00000137841;ENSMUST00000174295;ENSMUST00000124024;ENSMUST00000141228;ENSMUST00000129492;ENSMUST00000173691	GO:0005515(protein binding);GO:0005634(nucleus);GO:0005654(nucleoplasm);GO:0005737(cytoplasm);GO:0016604(nuclear body);GO:0016605(PML body);GO:0016925(protein sumoylation);GO:0019789(SUMO transferase activity);GO:0031386(protein tag);GO:0034504(protein localization to nucleus);GO:0043392(negative regulation of DNA binding);GO:0044389(ubiquitin-like protein ligase binding);GO:1900180(regulation of…	03013(RNA transport);05418(Fluid shear stress and atherosclerosis);05418(Fluid shear stress and atherosclerosis)	K12160	NA	small ubiquitin-like modifier 3 [Source:MGI Symbol;Acc:MGI:1336201]	protein_coding;nonsense_mediated_decay;processed_transcript	14.5424	41.5404	22.5196	38.2876	39.9955	41.4416	0.656525	-0.607077	0.0384075	1	down	no
ENSMUSG00000021965	Ska3	ENSMUST00000022536;ENSMUST00000223726;ENSMUST00000225646;ENSMUST00000225753;ENSMUST00000224108	GO:0000278(mitotic cell cycle);GO:0000775(chromosome, centromeric region);GO:0000776(kinetochore);GO:0000777(condensed chromosome kinetochore);GO:0000940(condensed chromosome outer kinetochore);GO:0003674(molecular_function);GO:0005694(chromosome);GO:0005737(cytoplasm);GO:0005813(centrosome);GO:0005819(spindle);GO:0005829(cytosol);GO:0005856(cytoskeleton);GO:0005874(microtubule);GO:0005876(spindl…	NA	NA	NA	spindle and kinetochore associated complex subunit 3 [Source:MGI Symbol;Acc:MGI:3041235]	protein_coding;processed_transcript;retained_intron	3.62232	2.65405	3.01033	4.82084	3.9118	6.28908	0.618218	-0.693813	0.0386495	1	down	no
ENSMUSG00000037544	Dlgap5	ENSMUST00000180299;ENSMUST00000043296;ENSMUST00000178773;ENSMUST00000179465;ENSMUST00000178661;ENSMUST00000227174;ENSMUST00000111778;ENSMUST00000179392;ENSMUST00000177822	GO:0005634(nucleus);GO:0005739(mitochondrion);GO:0005829(cytosol);GO:0023052(signaling);GO:0031616(spindle pole centrosome);GO:0034451(centriolar satellite);GO:0034451(centriolar satellite)	NA	K16804	NA	DLG associated protein 5 [Source:MGI Symbol;Acc:MGI:2183453]	protein_coding;retained_intron;nonsense_mediated_decay;processed_transcript	2.41723	2.04431	1.91434	2.89213	2.63888	4.14782	0.658744	-0.602209	0.0389629	1	down	no
ENSMUSG00000062309	Rpp25	ENSMUST00000080514	GO:0000172(ribonuclease MRP complex);GO:0001682(tRNA 5'-leader removal);GO:0003676(nucleic acid binding);GO:0003723(RNA binding);GO:0004526(ribonuclease P activity);GO:0005634(nucleus);GO:0005654(nucleoplasm);GO:0005730(nucleolus);GO:0006364(rRNA processing);GO:0008033(tRNA processing);GO:0016787(hydrolase activity);GO:0030681(multimeric ribonuclease P complex);GO:0033204(ribonuclease P RNA bindi…	03008(Ribosome biogenesis in eukaryotes);03013(RNA transport)	K14525	EC:3.1.26.5	ribonuclease P/MRP 25 subunit [Source:MGI Symbol;Acc:MGI:2143151]	protein_coding	14.0729	39.5677	19.5136	17.2115	14.6887	10.1617	1.7392	0.798425	0.0391772	1	up	no
ENSMUSG00000000028	Cdc45	ENSMUST00000000028;ENSMUST00000096990;ENSMUST00000231819;ENSMUST00000115585	GO:0000727(double-strand break repair via break-induced replication);GO:0003682(chromatin binding);GO:0003688(DNA replication origin binding);GO:0003697(single-stranded DNA binding);GO:0005634(nucleus);GO:0005654(nucleoplasm);GO:0005656(nuclear pre-replicative complex);GO:0005813(centrosome);GO:0006260(DNA replication);GO:0006270(DNA replication initiation);GO:0007049(cell cycle);GO:0031261(DNA r…	04110(Cell cycle);04110(Cell cycle)	K06628	NA	cell division cycle 45 [Source:MGI Symbol;Acc:MGI:1338073]	protein_coding;retained_intron	4.5538	3.61314	3.61168	5.66408	5.04783	7.14014	0.659791	-0.599919	0.0392927	1	down	no
ENSMUSG00000063558	Aox1	ENSMUST00000001027;ENSMUST00000160168	GO:0004031(aldehyde oxidase activity);GO:0005506(iron ion binding);GO:0005737(cytoplasm);GO:0005829(cytosol);GO:0009055(electron transfer activity);GO:0016491(oxidoreductase activity);GO:0017144(drug metabolic process);GO:0022900(electron transport chain);GO:0042802(identical protein binding);GO:0042803(protein homodimerization activity);GO:0043546(molybdopterin cofactor binding);GO:0046872(metal…	00280(Valine, leucine and isoleucine degradation);00350(Tyrosine metabolism);00380(Tryptophan metabolism);00750(Vitamin B6 metabolism);00760(Nicotinate and nicotinamide metabolism);00830(Retinol metabolism);00982(Drug metabolism - cytochrome P450);04630(Jak-STAT signaling pathway);04630(Jak-STAT signaling pathway)	K00157	EC:1.2.3.1	aldehyde oxidase 1 [Source:MGI Symbol;Acc:MGI:88035]	protein_coding;retained_intron	7.22523	5.62376	5.02407	3.96236	4.82029	3.69082	1.43289	0.518924	0.0395287	1	up	no
ENSMUSG00000042197	Zfp451	ENSMUST00000044455;ENSMUST00000140163;ENSMUST00000019861;ENSMUST00000194656;ENSMUST00000125723;ENSMUST00000130376;ENSMUST00000151055;ENSMUST00000139143;ENSMUST00000115167	GO:0003676(nucleic acid binding);GO:0003677(DNA binding);GO:0003714(transcription corepressor activity);GO:0005634(nucleus);GO:0005654(nucleoplasm);GO:0010468(regulation of gene expression);GO:0016605(PML body);GO:0016740(transferase activity);GO:0016925(protein sumoylation);GO:0030512(negative regulation of transforming growth factor beta receptor signaling pathway);GO:0046872(metal ion binding)…	NA	NA	NA	zinc finger protein 451 [Source:MGI Symbol;Acc:MGI:2137896]	protein_coding;processed_transcript;retained_intron;nonsense_mediated_decay	2.18764	2.14479	1.60751	1.69848	3.2941	3.93567	0.665296	-0.587931	0.0397383	1	down	no
ENSMUSG00000032913	Lrig2	ENSMUST00000200453;ENSMUST00000046316;ENSMUST00000199070;ENSMUST00000198332;ENSMUST00000198452;ENSMUST00000197018;ENSMUST00000199180;ENSMUST00000198089;ENSMUST00000196518	GO:0005102(signaling receptor binding);GO:0005515(protein binding);GO:0005615(extracellular space);GO:0005737(cytoplasm);GO:0005886(plasma membrane);GO:0007605(sensory perception of sound);GO:0010640(regulation of platelet-derived growth factor receptor signaling pathway);GO:0010977(negative regulation of neuron projection development);GO:0016020(membrane);GO:0016021(integral component of membran…	NA	NA	NA	leucine-rich repeats and immunoglobulin-like domains 2 [Source:MGI Symbol;Acc:MGI:2443718]	retained_intron;protein_coding	1.06208	1.61018	1.87616	2.44804	2.38786	2.08512	0.657189	-0.60562	0.0399712	1	down	no
ENSMUSG00000064354	mt-Co2	ENSMUST00000082405	GO:0004129(cytochrome-c oxidase activity);GO:0005507(copper ion binding);GO:0005739(mitochondrion);GO:0005743(mitochondrial inner membrane);GO:0007595(lactation);GO:0009409(response to cold);GO:0010729(positive regulation of hydrogen peroxide biosynthetic process);GO:0010940(positive regulation of necrotic cell death);GO:0016020(membrane);GO:0016021(integral component of membrane);GO:0016491(oxid…	00190(Oxidative phosphorylation);04260(Cardiac muscle contraction);04714(Thermogenesis);04932(Non-alcoholic fatty liver disease (NAFLD));05010(Alzheimer disease);05012(Parkinson disease);05016(Huntington disease)	K02261	NA	mitochondrially encoded cytochrome c oxidase II [Source:MGI Symbol;Acc:MGI:102503]	protein_coding	3327.81	3340.8	3537.71	2480.12	2582.18	2331.03	1.38048	0.465167	0.0400427	1	up	no
ENSMUSG00000052253	Zfp622	ENSMUST00000061875;ENSMUST00000227093;ENSMUST00000227912;ENSMUST00000226884	GO:0003676(nucleic acid binding);GO:0005634(nucleus);GO:0005654(nucleoplasm);GO:0005730(nucleolus);GO:0005737(cytoplasm);GO:0005794(Golgi apparatus);GO:0005829(cytosol);GO:0008270(zinc ion binding);GO:0008631(intrinsic apoptotic signaling pathway in response to oxidative stress);GO:0030687(preribosome, large subunit precursor);GO:0033674(positive regulation of kinase activity);GO:0042273(ribosoma…	NA	K14816	NA	zinc finger protein 622 [Source:MGI Symbol;Acc:MGI:1289282]	protein_coding;retained_intron	2.92228	5.3379	3.04859	5.75696	5.28895	5.46408	0.684965	-0.545898	0.0402335	1	down	no
ENSMUSG00000035399	Oser1	ENSMUST00000046908;ENSMUST00000139142;ENSMUST00000104954;ENSMUST00000123659;ENSMUST00000140454;ENSMUST00000127038;ENSMUST00000141301	GO:0003674(molecular_function);GO:0005575(cellular_component);GO:0070301(cellular response to hydrogen peroxide);GO:0070301(cellular response to hydrogen peroxide)	NA	NA	NA	oxidative stress responsive serine rich 1 [Source:MGI Symbol;Acc:MGI:1913930]	protein_coding;processed_transcript	9.12793	12.8777	9.07211	15.9371	15.7288	12.577	0.702437	-0.50956	0.0403441	1	down	no
ENSMUSG00000024186	Rgs11	ENSMUST00000147220;ENSMUST00000155072;ENSMUST00000139639;ENSMUST00000127594;ENSMUST00000025020;ENSMUST00000152299;ENSMUST00000146683;ENSMUST00000122058;ENSMUST00000152676;ENSMUST00000126464;ENSMUST00000123670	GO:0007186(G protein-coupled receptor signaling pathway);GO:0009968(negative regulation of signal transduction);GO:0031681(G-protein beta-subunit binding);GO:0032991(protein-containing complex);GO:0035556(intracellular signal transduction);GO:0035556(intracellular signal transduction)	NA	K16449	NA	regulator of G-protein signaling 11 [Source:MGI Symbol;Acc:MGI:1354739]	retained_intron;protein_coding;processed_transcript	15.6139	16.382	10.6246	9.83495	10.8385	9.46897	1.41397	0.49975	0.0403446	1	up	no
ENSMUSG00000105703	Gm43305	ENSMUST00000199958;ENSMUST00000225083	NA	NA	NA	NA	predicted gene 43305 [Source:MGI Symbol;Acc:MGI:5663442]	retained_intron;lincRNA	6.48075	4.46568	2.91297	1.45627	3.14596	3.37978	1.73633	0.796042	0.0407001	1	up	no
ENSMUSG00000016763	Scube1	ENSMUST00000016907;ENSMUST00000144773;ENSMUST00000230060;ENSMUST00000171496;ENSMUST00000076060;ENSMUST00000043634;ENSMUST00000229057	GO:0005509(calcium ion binding);GO:0005515(protein binding);GO:0005576(extracellular region);GO:0005615(extracellular space);GO:0005886(plasma membrane);GO:0009897(external side of plasma membrane);GO:0009986(cell surface);GO:0016020(membrane);GO:0019897(extrinsic component of plasma membrane);GO:0042802(identical protein binding);GO:0045880(positive regulation of smoothened signaling pathway);GO…	NA	NA	NA	signal peptide, CUB domain, EGF-like 1 [Source:MGI Symbol;Acc:MGI:1890616]	protein_coding;retained_intron	2.28733	2.88148	2.3459	2.93803	3.99609	3.72945	0.704709	-0.504901	0.0412127	1	down	no
ENSMUSG00000106734	Gm20559	ENSMUST00000201831;ENSMUST00000201976;ENSMUST00000202514;ENSMUST00000202544;ENSMUST00000201032;ENSMUST00000202696	NA	NA	NA	NA	predicted gene, 20559 [Source:MGI Symbol;Acc:MGI:5295666]	lincRNA;processed_transcript;retained_intron	5.73051	4.4012	4.46194	3.00677	3.04899	3.53166	1.52217	0.606126	0.0413877	1	up	no
ENSMUSG00000021185	Dglucy	ENSMUST00000069782;ENSMUST00000167322;ENSMUST00000110070;ENSMUST00000222484;ENSMUST00000110073;ENSMUST00000133970;ENSMUST00000110069;ENSMUST00000154603;ENSMUST00000124957	GO:0005739(mitochondrion);GO:0005759(mitochondrial matrix);GO:0006536(glutamate metabolic process);GO:0016829(lyase activity);GO:0047820(D-glutamate cyclase activity);GO:0047820(D-glutamate cyclase activity)	00471(D-Glutamine and D-glutamate metabolism);00471(D-Glutamine and D-glutamate metabolism)	K22210	EC:4.2.1.48	D-glutamate cyclase [Source:MGI Symbol;Acc:MGI:2444813]	protein_coding;nonsense_mediated_decay;retained_intron;processed_transcript	2.61888	2.44197	3.66342	3.9677	5.16368	4.34809	0.647226	-0.627658	0.0413932	1	down	no
ENSMUSG00000021556	Golm1	ENSMUST00000022039;ENSMUST00000224160;ENSMUST00000225333;ENSMUST00000095739	GO:0003674(molecular_function);GO:0005794(Golgi apparatus);GO:0006997(nucleus organization);GO:0016020(membrane);GO:0016021(integral component of membrane);GO:0019216(regulation of lipid metabolic process);GO:0019216(regulation of lipid metabolic process)	NA	NA	NA	golgi membrane protein 1 [Source:MGI Symbol;Acc:MGI:1917329]	protein_coding;processed_transcript	2.28434	1.71871	2.61506	7.82669	2.38138	2.27603	0.530124	-0.915598	0.0415704	1	down	no
ENSMUSG00000002307	Daxx	ENSMUST00000079421;ENSMUST00000174646;ENSMUST00000173279;ENSMUST00000234670;ENSMUST00000172859;ENSMUST00000173028;ENSMUST00000174541;ENSMUST00000170075;ENSMUST00000173626;ENSMUST00000174146	GO:0000775(chromosome, centromeric region);GO:0001934(positive regulation of protein phosphorylation);GO:0002039(p53 binding);GO:0003713(transcription coactivator activity);GO:0003714(transcription corepressor activity);GO:0005634(nucleus);GO:0005654(nucleoplasm);GO:0005694(chromosome);GO:0005730(nucleolus);GO:0005737(cytoplasm);GO:0006325(chromatin organization);GO:0006334(nucleosome assembly);G…	04010(MAPK signaling pathway);04210(Apoptosis);05014(Amyotrophic lateral sclerosis (ALS));05168(Herpes simplex virus 1 infection);05168(Herpes simplex virus 1 infection)	K02308	NA	Fas death domain-associated protein [Source:MGI Symbol;Acc:MGI:1197015]	protein_coding;retained_intron;processed_transcript	8.65576	8.14516	8.85833	14.271	14.8035	8.41263	0.684482	-0.546916	0.0420262	1	down	no
ENSMUSG00000001228	Uhrf1	ENSMUST00000001258;ENSMUST00000113039;ENSMUST00000113035;ENSMUST00000113038;ENSMUST00000137876;ENSMUST00000139654;ENSMUST00000142387	GO:0000122(negative regulation of transcription by RNA polymerase II);GO:0000790(nuclear chromatin);GO:0000791(euchromatin);GO:0000792(heterochromatin);GO:0000987(cis-regulatory region sequence-specific DNA binding);GO:0003677(DNA binding);GO:0004842(ubiquitin-protein transferase activity);GO:0005515(protein binding);GO:0005634(nucleus);GO:0005654(nucleoplasm);GO:0005657(replication fork);GO:0005…	NA	K10638	EC:2.3.2.27	ubiquitin-like, containing PHD and RING finger domains, 1 [Source:MGI Symbol;Acc:MGI:1338889]	protein_coding;retained_intron	12.4035	10.9775	11.3238	11.9421	15.5882	19.9357	0.731151	-0.451759	0.0420327	1	down	no
ENSMUSG00000039701	Usp53	ENSMUST00000090379;ENSMUST00000199329;ENSMUST00000197358;ENSMUST00000197934;ENSMUST00000199923;ENSMUST00000200188;ENSMUST00000197314;ENSMUST00000197801;ENSMUST00000199401;ENSMUST00000198814	GO:0001508(action potential);GO:0005515(protein binding);GO:0005911(cell-cell junction);GO:0005923(bicellular tight junction);GO:0006508(proteolysis);GO:0006915(apoptotic process);GO:0007605(sensory perception of sound);GO:0010996(response to auditory stimulus);GO:0016579(protein deubiquitination);GO:0030054(cell junction);GO:0036459(thiol-dependent ubiquitinyl hydrolase activity);GO:0051402(neur…	NA	NA	NA	ubiquitin specific peptidase 53 [Source:MGI Symbol;Acc:MGI:2139607]	protein_coding;nonsense_mediated_decay;retained_intron	2.5763	1.98137	3.34926	1.97102	1.63201	1.54546	1.53577	0.618965	0.0421016	1	up	no
ENSMUSG00000020185	E2f7	ENSMUST00000073781;ENSMUST00000174857;ENSMUST00000173634;ENSMUST00000174810;ENSMUST00000173294;ENSMUST00000173471;ENSMUST00000174593;ENSMUST00000173948;ENSMUST00000172574	GO:0000122(negative regulation of transcription by RNA polymerase II);GO:0000977(RNA polymerase II regulatory region sequence-specific DNA binding);GO:0000978(RNA polymerase II cis-regulatory region sequence-specific DNA binding);GO:0000981(DNA-binding transcription factor activity, RNA polymerase II-specific);GO:0000987(cis-regulatory region sequence-specific DNA binding);GO:0001217(DNA-binding …	NA	K09391	NA	E2F transcription factor 7 [Source:MGI Symbol;Acc:MGI:1289147]	protein_coding;retained_intron;processed_transcript;nonsense_mediated_decay	1.10549	1.02247	0.94869	1.43786	1.34557	2.04834	0.636755	-0.651191	0.0423136	1	down	no
ENSMUSG00000025940	Tmem70	ENSMUST00000177501;ENSMUST00000065373;ENSMUST00000177532;ENSMUST00000176451	GO:0003674(molecular_function);GO:0005654(nucleoplasm);GO:0005739(mitochondrion);GO:0005743(mitochondrial inner membrane);GO:0016020(membrane);GO:0016021(integral component of membrane);GO:0032592(integral component of mitochondrial membrane);GO:0033615(mitochondrial proton-transporting ATP synthase complex assembly);GO:0033615(mitochondrial proton-transporting ATP synthase complex assembly)	NA	K17966	NA	transmembrane protein 70 [Source:MGI Symbol;Acc:MGI:1915068]	protein_coding;processed_transcript	7.815	6.822	19.6749	20.2515	18.2775	19.7294	0.588961	-0.763755	0.0423368	1	down	no
ENSMUSG00000040627	Aicda	ENSMUST00000043301;ENSMUST00000160685	GO:0000932(P-body);GO:0003723(RNA binding);GO:0003824(catalytic activity);GO:0004126(cytidine deaminase activity);GO:0005515(protein binding);GO:0005634(nucleus);GO:0005737(cytoplasm);GO:0006397(mRNA processing);GO:0008270(zinc ion binding);GO:0009972(cytidine deamination);GO:0010529(negative regulation of transposition);GO:0016445(somatic diversification of immunoglobulins);GO:0016446(somatic hy…	04672(Intestinal immune network for IgA production);05340(Primary immunodeficiency);05340(Primary immunodeficiency)	K10989	EC:3.5.4.38	activation-induced cytidine deaminase [Source:MGI Symbol;Acc:MGI:1342279]	protein_coding	1.24794	1.13715	0.671624	1.25553	2.62889	1.76513	0.541054	-0.886156	0.0427799	1	down	no
ENSMUSG00000030314	Atg7	ENSMUST00000182793;ENSMUST00000032457;ENSMUST00000204593;ENSMUST00000182428;ENSMUST00000182510;ENSMUST00000182934;ENSMUST00000183127;ENSMUST00000182860;ENSMUST00000169310;ENSMUST00000182034;ENSMUST00000182771;ENSMUST00000182902;ENSMUST00000182169;ENSMUST00000182098;ENSMUST00000182035;ENSMUST00000183165;ENSMUST00000203130	GO:0000045(autophagosome assembly);GO:0000407(phagophore assembly site);GO:0000422(autophagy of mitochondrion);GO:0001889(liver development);GO:0005515(protein binding);GO:0005737(cytoplasm);GO:0005829(cytosol);GO:0005930(axoneme);GO:0006497(protein lipidation);GO:0006501(C-terminal protein lipidation);GO:0006914(autophagy);GO:0006995(cellular response to nitrogen starvation);GO:0006996(organelle…	04136(Autophagy - other);04140(Autophagy - animal);04216(Ferroptosis);04216(Ferroptosis)	K08337	NA	autophagy related 7 [Source:MGI Symbol;Acc:MGI:1921494]	protein_coding;retained_intron;processed_transcript	4.15765	5.0355	5.18307	3.42527	3.53653	2.73597	1.48243	0.56796	0.0431496	1	up	no
ENSMUSG00000030446	Zfp273	ENSMUST00000012725;ENSMUST00000181391;ENSMUST00000181246	GO:0003676(nucleic acid binding);GO:0005575(cellular_component);GO:0006355(regulation of transcription, DNA-templated);GO:0046872(metal ion binding);GO:0046872(metal ion binding)	05168(Herpes simplex virus 1 infection);05168(Herpes simplex virus 1 infection)	K09228	NA	zinc finger protein 273 [Source:MGI Symbol;Acc:MGI:3036278]	protein_coding;retained_intron	1.52602	1.31242	0.841524	0.455982	0.638175	0.847957	1.89483	0.922067	0.0432027	1	up	no
ENSMUSG00000039748	Exo1	ENSMUST00000194306;ENSMUST00000039725;ENSMUST00000193822;ENSMUST00000194816;ENSMUST00000194636;ENSMUST00000191680;ENSMUST00000195196;ENSMUST00000193610;ENSMUST00000193858;ENSMUST00000192378	GO:0002376(immune system process);GO:0002455(humoral immune response mediated by circulating immunoglobulin);GO:0003677(DNA binding);GO:0003682(chromatin binding);GO:0003824(catalytic activity);GO:0004518(nuclease activity);GO:0004519(endonuclease activity);GO:0004527(exonuclease activity);GO:0005634(nucleus);GO:0005654(nucleoplasm);GO:0005886(plasma membrane);GO:0006139(nucleobase-containing com…	03430(Mismatch repair);03430(Mismatch repair)	K10746	EC:3.1.-.-	exonuclease 1 [Source:MGI Symbol;Acc:MGI:1349427]	protein_coding;retained_intron;processed_transcript	0.921177	1.51876	0.887392	1.30702	1.62891	2.55253	0.606241	-0.722036	0.0432442	1	down	no
ENSMUSG00000068551	Zfp467	ENSMUST00000114561;ENSMUST00000114560;ENSMUST00000114556;ENSMUST00000114558;ENSMUST00000114564;ENSMUST00000101443;ENSMUST00000140198;ENSMUST00000141449;ENSMUST00000114559;ENSMUST00000114563;ENSMUST00000114566	GO:0000978(RNA polymerase II cis-regulatory region sequence-specific DNA binding);GO:0001228(DNA-binding transcription activator activity, RNA polymerase II-specific);GO:0003676(nucleic acid binding);GO:0003677(DNA binding);GO:0005515(protein binding);GO:0005634(nucleus);GO:0006355(regulation of transcription, DNA-templated);GO:0045944(positive regulation of transcription by RNA polymerase II);GO…	NA	NA	NA	zinc finger protein 467 [Source:MGI Symbol;Acc:MGI:1916160]	protein_coding;retained_intron;nonsense_mediated_decay	6.13619	6.77051	6.72902	12.8923	5.75097	10.7885	0.66716	-0.583895	0.0435306	1	down	no
ENSMUSG00000046818	Ddit4l	ENSMUST00000053855;ENSMUST00000167564;ENSMUST00000165845	GO:0003674(molecular_function);GO:0005575(cellular_component);GO:0005737(cytoplasm);GO:0008150(biological_process);GO:0009968(negative regulation of signal transduction);GO:0009968(negative regulation of signal transduction)	NA	NA	NA	DNA-damage-inducible transcript 4-like [Source:MGI Symbol;Acc:MGI:1920534]	protein_coding;processed_transcript	32.5302	33.7445	32.3304	44.0738	39.8652	45.5603	0.761433	-0.393211	0.0437192	1	down	no
ENSMUSG00000028654	Mycl	ENSMUST00000030407;ENSMUST00000106252;ENSMUST00000147259;ENSMUST00000135925;ENSMUST00000144998	GO:0000978(RNA polymerase II cis-regulatory region sequence-specific DNA binding);GO:0001228(DNA-binding transcription activator activity, RNA polymerase II-specific);GO:0003677(DNA binding);GO:0003700(DNA-binding transcription factor activity);GO:0005515(protein binding);GO:0005634(nucleus);GO:0005654(nucleoplasm);GO:0006355(regulation of transcription, DNA-templated);GO:0042025(host cell nucleu…	NA	K09110	NA	v-myc avian myelocytomatosis viral oncogene lung carcinoma derived [Source:MGI Symbol;Acc:MGI:96799]	protein_coding;processed_transcript	39.3648	41.8535	22.9287	16.9171	19.4608	32.6344	1.50911	0.593696	0.043762	1	up	no
ENSMUSG00000091971	Hspa1a	ENSMUST00000087328	GO:0000166(nucleotide binding);GO:0000723(telomere maintenance);GO:0001664(G protein-coupled receptor binding);GO:0002020(protease binding);GO:0003714(transcription corepressor activity);GO:0005102(signaling receptor binding);GO:0005515(protein binding);GO:0005524(ATP binding);GO:0005634(nucleus);GO:0005737(cytoplasm);GO:0005739(mitochondrion);GO:0005813(centrosome);GO:0005814(centriole);GO:00058…	03040(Spliceosome);04010(MAPK signaling pathway);04141(Protein processing in endoplasmic reticulum);04144(Endocytosis);04213(Longevity regulating pathway - multiple species);04612(Antigen processing and presentation);04915(Estrogen signaling pathway);05020(Prion diseases);05134(Legionellosis);05145(Toxoplasmosis);05162(Measles);05164(Influenza A)	K03283	NA	heat shock protein 1A [Source:MGI Symbol;Acc:MGI:96244]	protein_coding	16.6754	7.68354	8.8536	5.31415	3.36446	10.1333	1.7655	0.820081	0.0438337	1	up	no
ENSMUSG00000007659	Bcl2l1	ENSMUST00000128172;ENSMUST00000109820;ENSMUST00000146380;ENSMUST00000007803;ENSMUST00000140436;ENSMUST00000173755;ENSMUST00000156688;ENSMUST00000134902;ENSMUST00000134357	GO:0001541(ovarian follicle development);GO:0001701(in utero embryonic development);GO:0001836(release of cytochrome c from mitochondria);GO:0002931(response to ischemia);GO:0005515(protein binding);GO:0005634(nucleus);GO:0005737(cytoplasm);GO:0005739(mitochondrion);GO:0005740(mitochondrial envelope);GO:0005741(mitochondrial outer membrane);GO:0005743(mitochondrial inner membrane);GO:0005759(mito…	01521(EGFR tyrosine kinase inhibitor resistance);01524(Platinum drug resistance);04014(Ras signaling pathway);04064(NF-kappa B signaling pathway);04115(p53 signaling pathway);04137(Mitophagy - animal);04140(Autophagy - animal);04151(PI3K-Akt signaling pathway);04210(Apoptosis);04215(Apoptosis - multiple species);04621(NOD-like receptor signaling pathway);04630(Jak-STAT signaling pathway);05014(Am…	K04570	NA	BCL2-like 1 [Source:MGI Symbol;Acc:MGI:88139]	protein_coding;processed_transcript	12.1314	13.069	12.2938	17.1109	16.9726	14.971	0.764336	-0.387721	0.0438665	1	down	no
ENSMUSG00000001175	Calm1	ENSMUST00000110082;ENSMUST00000127300;ENSMUST00000153524;ENSMUST00000001204	GO:0000086(G2/M transition of mitotic cell cycle);GO:0000226(microtubule cytoskeleton organization);GO:0000922(spindle pole);GO:0001975(response to amphetamine);GO:0002027(regulation of heart rate);GO:0005509(calcium ion binding);GO:0005513(detection of calcium ion);GO:0005515(protein binding);GO:0005634(nucleus);GO:0005654(nucleoplasm);GO:0005737(cytoplasm);GO:0005813(centrosome);GO:0005819(spin…	04014(Ras signaling pathway);04015(Rap1 signaling pathway);04020(Calcium signaling pathway);04022(cGMP-PKG signaling pathway);04024(cAMP signaling pathway);04070(Phosphatidylinositol signaling system);04114(Oocyte meiosis);04218(Cellular senescence);04261(Adrenergic signaling in cardiomyocytes);04270(Vascular smooth muscle contraction);04371(Apelin signaling pathway);04625(C-type lectin receptor …	K02183	NA	calmodulin 1 [Source:MGI Symbol;Acc:MGI:88251]	protein_coding;retained_intron	24.4413	28.0893	30.7461	26.8675	29.018	76.4982	0.629055	-0.668742	0.0443697	1	down	no
ENSMUSG00000116835	Gm49594	ENSMUST00000231993	NA	NA	NA	NA	predicted gene, 49594 [Source:MGI Symbol;Acc:MGI:6215000]	processed_pseudogene	170.155	189.888	166.795	304.33	214.991	196.834	0.73565	-0.442909	0.0443892	1	down	no
ENSMUSG00000102336	Gm37233	ENSMUST00000192173	NA	NA	NA	NA	predicted gene, 37233 [Source:MGI Symbol;Acc:MGI:5610461]	lincRNA	0.100684	0.130504	0.143777	0.267102	0.242935	0.226189	0.509307	-0.973393	0.0445129	1	down	no
ENSMUSG00000079553	Kifc1	ENSMUST00000172608;ENSMUST00000173492;ENSMUST00000174507;ENSMUST00000173885;ENSMUST00000173386;ENSMUST00000173982;ENSMUST00000114361	GO:0000166(nucleotide binding);GO:0003777(microtubule motor activity);GO:0005515(protein binding);GO:0005524(ATP binding);GO:0005634(nucleus);GO:0005737(cytoplasm);GO:0005768(endosome);GO:0005769(early endosome);GO:0005815(microtubule organizing center);GO:0005819(spindle);GO:0005856(cytoskeleton);GO:0005871(kinesin complex);GO:0005874(microtubule);GO:0007018(microtubule-based movement);GO:000704…	NA	K10405	NA	kinesin family member C1 [Source:MGI Symbol;Acc:MGI:109596]	retained_intron;protein_coding	5.91936	6.18861	5.79354	7.9584	6.96965	11.0521	0.689044	-0.537332	0.0446358	1	down	no
ENSMUSG00000020044	Timp3	ENSMUST00000020234;ENSMUST00000132307;ENSMUST00000151134;ENSMUST00000136045	GO:0002020(protease binding);GO:0004857(enzyme inhibitor activity);GO:0005515(protein binding);GO:0005576(extracellular region);GO:0005604(basement membrane);GO:0005615(extracellular space);GO:0005737(cytoplasm);GO:0008191(metalloendopeptidase inhibitor activity);GO:0008270(zinc ion binding);GO:0009725(response to hormone);GO:0010033(response to organic substance);GO:0010466(negative regulation o…	05205(Proteoglycans in cancer);05206(MicroRNAs in cancer);05206(MicroRNAs in cancer)	K16866	NA	tissue inhibitor of metalloproteinase 3 [Source:MGI Symbol;Acc:MGI:98754]	protein_coding;processed_transcript	47.4055	36.1262	34.4822	26.5562	30.272	28.2931	1.38642	0.471364	0.0447101	1	up	no
ENSMUSG00000034165	Ccnd3	ENSMUST00000182539;ENSMUST00000182506;ENSMUST00000171031;ENSMUST00000037333;ENSMUST00000182209;ENSMUST00000182129;ENSMUST00000182848;ENSMUST00000183044;ENSMUST00000182281;ENSMUST00000182846;ENSMUST00000183256;ENSMUST00000183158;ENSMUST00000183206;ENSMUST00000182060;ENSMUST00000183014;ENSMUST00000182874;ENSMUST00000182935;ENSMUST00000183061;ENSMUST00000183177;ENSMUST00000183210;ENSMUST00000182591	GO:0000079(regulation of cyclin-dependent protein serine/threonine kinase activity);GO:0000122(negative regulation of transcription by RNA polymerase II);GO:0000307(cyclin-dependent protein kinase holoenzyme complex);GO:0001934(positive regulation of protein phosphorylation);GO:0004693(cyclin-dependent protein serine/threonine kinase activity);GO:0005515(protein binding);GO:0005634(nucleus);GO:00…	04110(Cell cycle);04115(p53 signaling pathway);04151(PI3K-Akt signaling pathway);04218(Cellular senescence);04310(Wnt signaling pathway);04390(Hippo signaling pathway);04510(Focal adhesion);04630(Jak-STAT signaling pathway);05162(Measles);05165(Human papillomavirus infection);05166(Human T-cell leukemia virus 1 infection);05169(Epstein-Barr virus infection);05200(Pathways in cancer);05203(Viral c…	K10152	NA	cyclin D3 [Source:MGI Symbol;Acc:MGI:88315]	protein_coding;retained_intron	2.53002	3.02741	2.81	2.93038	5.35776	3.91927	0.685438	-0.544901	0.0447852	1	down	no
ENSMUSG00000021379	Id4	ENSMUST00000021810	GO:0000082(G1/S transition of mitotic cell cycle);GO:0000122(negative regulation of transcription by RNA polymerase II);GO:0001085(RNA polymerase II transcription factor binding);GO:0001649(osteoblast differentiation);GO:0005515(protein binding);GO:0005634(nucleus);GO:0005654(nucleoplasm);GO:0005737(cytoplasm);GO:0007405(neuroblast proliferation);GO:0007420(brain development);GO:0007623(circadian…	04350(TGF-beta signaling pathway);04550(Signaling pathways regulating pluripotency of stem cells)	K17695	NA	inhibitor of DNA binding 4 [Source:MGI Symbol;Acc:MGI:99414]	protein_coding	3.33988	2.73273	2.29164	1.58234	1.51251	1.93687	1.6623	0.733185	0.0449276	1	up	no
ENSMUSG00000027490	E2f1	ENSMUST00000000894;ENSMUST00000103145	GO:0000077(DNA damage checkpoint);GO:0000122(negative regulation of transcription by RNA polymerase II);GO:0000790(nuclear chromatin);GO:0000976(transcription regulatory region sequence-specific DNA binding);GO:0000981(DNA-binding transcription factor activity, RNA polymerase II-specific);GO:0000987(cis-regulatory region sequence-specific DNA binding);GO:0001216(DNA-binding transcription activato…	01522(Endocrine resistance);04110(Cell cycle);04137(Mitophagy - animal);04218(Cellular senescence);04934(Cushing syndrome);05160(Hepatitis C);05161(Hepatitis B);05163(Human cytomegalovirus infection);05165(Human papillomavirus infection);05166(Human T-cell leukemia virus 1 infection);05167(Kaposi sarcoma-associated herpesvirus infection);05169(Epstein-Barr virus infection);05200(Pathways in cance…	K17454	NA	E2F transcription factor 1 [Source:MGI Symbol;Acc:MGI:101941]	protein_coding	4.8311	5.71878	5.83876	7.1165	8.28698	8.4041	0.688379	-0.538725	0.0450125	1	down	no
ENSMUSG00000017716	Birc5	ENSMUST00000081387;ENSMUST00000093906	GO:0000086(G2/M transition of mitotic cell cycle);GO:0000226(microtubule cytoskeleton organization);GO:0000228(nuclear chromosome);GO:0000281(mitotic cytokinesis);GO:0000775(chromosome, centromeric region);GO:0000776(kinetochore);GO:0000777(condensed chromosome kinetochore);GO:0004869(cysteine-type endopeptidase inhibitor activity);GO:0005515(protein binding);GO:0005634(nucleus);GO:0005694(chromo…	01524(Platinum drug resistance);04210(Apoptosis);04215(Apoptosis - multiple species);04390(Hippo signaling pathway);05161(Hepatitis B);05200(Pathways in cancer);05210(Colorectal cancer);05210(Colorectal cancer)	K08731	NA	baculoviral IAP repeat-containing 5 [Source:MGI Symbol;Acc:MGI:1203517]	protein_coding	11.1558	9.37396	9.28895	12.495	11.5404	17.189	0.723327	-0.46728	0.0451553	1	down	no
ENSMUSG00000098318	Lockd	ENSMUST00000183867;ENSMUST00000184504;ENSMUST00000184991;ENSMUST00000183905;ENSMUST00000185152	NA	NA	NA	NA	lncRNA downstream of Cdkn1b [Source:MGI Symbol;Acc:MGI:1915081]	lincRNA	0.621306	1.4327	1.48297	3.04066	2.45632	1.08795	0.537133	-0.896648	0.045327	1	down	no
ENSMUSG00000099094	Gm19569	ENSMUST00000184563;ENSMUST00000184658	NA	NA	NA	NA	predicted gene, 19569 [Source:MGI Symbol;Acc:MGI:5011754]	retained_intron;lincRNA	2.60001	1.89665	1.79475	1.14003	1.07593	1.13435	1.87786	0.909088	0.0454195	1	up	no
ENSMUSG00000064363	mt-Nd4	ENSMUST00000082414	GO:0001666(response to hypoxia);GO:0001701(in utero embryonic development);GO:0005739(mitochondrion);GO:0005747(mitochondrial respiratory chain complex I);GO:0006120(mitochondrial electron transport, NADH to ubiquinone);GO:0007568(aging);GO:0008137(NADH dehydrogenase (ubiquinone) activity);GO:0009060(aerobic respiration);GO:0015990(electron transport coupled proton transport);GO:0016020(membrane)…	00190(Oxidative phosphorylation);04714(Thermogenesis);04723(Retrograde endocannabinoid signaling);05012(Parkinson disease)	K03881	EC:7.1.1.2	mitochondrially encoded NADH dehydrogenase 4 [Source:MGI Symbol;Acc:MGI:102498]	protein_coding	1442.57	1365.28	1293.15	1009.74	990.243	1004.33	1.36504	0.448941	0.045424	1	up	no
ENSMUSG00000034023	Fancd2	ENSMUST00000036340;ENSMUST00000142453;ENSMUST00000123738;ENSMUST00000129462;ENSMUST00000143535;ENSMUST00000124262;ENSMUST00000101051;ENSMUST00000204827	GO:0000793(condensed chromosome);GO:0005515(protein binding);GO:0005634(nucleus);GO:0005654(nucleoplasm);GO:0005730(nucleolus);GO:0005829(cytosol);GO:0006281(DNA repair);GO:0006974(cellular response to DNA damage stimulus);GO:0007049(cell cycle);GO:0007129(synapsis);GO:0007275(multicellular organism development);GO:0007276(gamete generation);GO:0010332(response to gamma radiation);GO:0016604(nucl…	03460(Fanconi anemia pathway);03460(Fanconi anemia pathway)	K10891	NA	Fanconi anemia, complementation group D2 [Source:MGI Symbol;Acc:MGI:2448480]	protein_coding;retained_intron;nonsense_mediated_decay	1.33264	1.30545	1.12292	1.86655	1.53558	2.40987	0.64711	-0.627917	0.0454713	1	down	no
ENSMUSG00000029910	Mad2l1	ENSMUST00000101343;ENSMUST00000116605;ENSMUST00000125430;ENSMUST00000135411	GO:0000070(mitotic sister chromatid segregation);GO:0000132(establishment of mitotic spindle orientation);GO:0000775(chromosome, centromeric region);GO:0000776(kinetochore);GO:0000777(condensed chromosome kinetochore);GO:0000922(spindle pole);GO:0005515(protein binding);GO:0005634(nucleus);GO:0005654(nucleoplasm);GO:0005694(chromosome);GO:0005737(cytoplasm);GO:0005829(cytosol);GO:0005856(cytoskel…	04110(Cell cycle);04114(Oocyte meiosis);04914(Progesterone-mediated oocyte maturation);05166(Human T-cell leukemia virus 1 infection);05166(Human T-cell leukemia virus 1 infection)	K02537	NA	MAD2 mitotic arrest deficient-like 1 [Source:MGI Symbol;Acc:MGI:1860374]	protein_coding;retained_intron;processed_transcript	3.82344	3.08963	3.42537	4.06837	4.40485	6.11404	0.708731	-0.49669	0.0457261	1	down	no
ENSMUSG00000097375	6720427I07Rik	ENSMUST00000181490	NA	NA	NA	NA	RIKEN cDNA 6720427I07 gene [Source:MGI Symbol;Acc:MGI:1924398]	lincRNA	2.84043	2.16059	2.07261	1.53569	1.41306	1.42685	1.61661	0.692968	0.0457986	1	up	no
ENSMUSG00000068120	Gm10231	ENSMUST00000181584	NA	NA	NA	NA	predicted pseudogene 10231 [Source:MGI Symbol;Acc:MGI:3704468]	processed_pseudogene	50.0153	49.4333	43.0772	109.165	50.9416	57.2642	0.655682	-0.608932	0.0460286	1	down	no
ENSMUSG00000084939	Gm830	ENSMUST00000142458	NA	NA	NA	NA	predicted gene 830 [Source:MGI Symbol;Acc:MGI:2685676]	processed_transcript	1.13232	0.725138	0.603896	0.974503	2.06085	1.47879	0.545253	-0.875001	0.0460456	1	down	no
ENSMUSG00000022957	Itsn1	ENSMUST00000138117;ENSMUST00000056482;ENSMUST00000113996;ENSMUST00000095909;ENSMUST00000153741;ENSMUST00000154967;ENSMUST00000114002;ENSMUST00000137575;ENSMUST00000139890;ENSMUST00000156841;ENSMUST00000126374;ENSMUST00000124094;ENSMUST00000125052;ENSMUST00000231735;ENSMUST00000151044;ENSMUST00000113999;ENSMUST00000064797;ENSMUST00000231852;ENSMUST00000231535;ENSMUST00000143023;ENSMUST00000131983;…	GO:0005085(guanyl-nucleotide exchange factor activity);GO:0005509(calcium ion binding);GO:0005515(protein binding);GO:0005634(nucleus);GO:0005635(nuclear envelope);GO:0005737(cytoplasm);GO:0005768(endosome);GO:0005829(cytosol);GO:0005886(plasma membrane);GO:0005905(clathrin-coated pit);GO:0006887(exocytosis);GO:0006897(endocytosis);GO:0007264(small GTPase mediated signal transduction);GO:0007420(…	NA	K20045	NA	intersectin 1 (SH3 domain protein 1A) [Source:MGI Symbol;Acc:MGI:1338069]	retained_intron;protein_coding;nonsense_mediated_decay;processed_transcript	5.87203	5.69845	4.59173	6.70968	6.95195	7.56975	0.761242	-0.393573	0.0461842	1	down	no
ENSMUSG00000036062	Phf24	ENSMUST00000107975;ENSMUST00000107976;ENSMUST00000124380;ENSMUST00000139100;ENSMUST00000132173;ENSMUST00000138425;ENSMUST00000069184;ENSMUST00000131234;ENSMUST00000151824	GO:0005515(protein binding);GO:0005575(cellular_component);GO:0007214(gamma-aminobutyric acid signaling pathway);GO:0008277(regulation of G protein-coupled receptor signaling pathway);GO:0032228(regulation of synaptic transmission, GABAergic);GO:0046872(metal ion binding);GO:0050966(detection of mechanical stimulus involved in sensory perception of pain);GO:0050966(detection of mechanical stimulu…	NA	NA	NA	PHD finger protein 24 [Source:MGI Symbol;Acc:MGI:2140712]	protein_coding;nonsense_mediated_decay;processed_transcript	1.18619	1.48077	0.691248	0.638263	0.529042	0.700148	1.79829	0.846622	0.0464203	1	up	no
ENSMUSG00000118332	Fam220a	ENSMUST00000067145;ENSMUST00000119488;ENSMUST00000118121;ENSMUST00000169329;ENSMUST00000101434	GO:0000122(negative regulation of transcription by RNA polymerase II);GO:0005515(protein binding);GO:0005634(nucleus);GO:0006470(protein dephosphorylation);GO:0032092(positive regulation of protein binding);GO:0097677(STAT family protein binding);GO:0097677(STAT family protein binding)	NA	NA	NA	family with sequence similarity 220, member A [Source:MGI Symbol;Acc:MGI:1914488]	protein_coding;nonsense_mediated_decay	8.76511	8.76831	8.10627	9.20038	13.028	14.2916	0.702073	-0.510308	0.0464662	1	down	no
ENSMUSG00000071547	Nt5dc2	ENSMUST00000227096;ENSMUST00000090212;ENSMUST00000227794;ENSMUST00000227690;ENSMUST00000226975;ENSMUST00000226588	GO:0005575(cellular_component);GO:0008253(5'-nucleotidase activity);GO:0016311(dephosphorylation);GO:0016787(hydrolase activity);GO:0046872(metal ion binding);GO:0046872(metal ion binding)	NA	NA	NA	5'-nucleotidase domain containing 2 [Source:MGI Symbol;Acc:MGI:1917271]	protein_coding;retained_intron	30.205	27.5042	27.94	35.6218	31.8932	46.1412	0.753581	-0.408165	0.0467664	1	down	no
ENSMUSG00000062515	Fabp4	ENSMUST00000029041;ENSMUST00000191757	GO:0001816(cytokine production);GO:0005324(long-chain fatty acid transporter activity);GO:0005504(fatty acid binding);GO:0005634(nucleus);GO:0005654(nucleoplasm);GO:0005737(cytoplasm);GO:0005829(cytosol);GO:0006469(negative regulation of protein kinase activity);GO:0006631(fatty acid metabolic process);GO:0008284(positive regulation of cell population proliferation);GO:0008289(lipid binding);GO:0…	03320(PPAR signaling pathway);04923(Regulation of lipolysis in adipocytes);04923(Regulation of lipolysis in adipocytes)	K08753	NA	fatty acid binding protein 4, adipocyte [Source:MGI Symbol;Acc:MGI:88038]	protein_coding;retained_intron	1.58499	1.82293	1.00566	0.700894	1.11439	0.548547	1.86713	0.900821	0.0468006	1	up	no
ENSMUSG00000037337	Map4k1	ENSMUST00000085835;ENSMUST00000208227;ENSMUST00000208784;ENSMUST00000207185	GO:0000165(MAPK cascade);GO:0000166(nucleotide binding);GO:0000185(activation of MAPKKK activity);GO:0004672(protein kinase activity);GO:0004674(protein serine/threonine kinase activity);GO:0005515(protein binding);GO:0005524(ATP binding);GO:0006468(protein phosphorylation);GO:0007257(activation of JUN kinase activity);GO:0008283(cell population proliferation);GO:0008349(MAP kinase kinase kinase …	04010(MAPK signaling pathway);04010(MAPK signaling pathway)	K04408	EC:2.7.11.1	mitogen-activated protein kinase kinase kinase kinase 1 [Source:MGI Symbol;Acc:MGI:1346882]	protein_coding;retained_intron;nonsense_mediated_decay	0.999628	1.09554	1.04451	1.59397	1.70496	2.00778	0.591642	-0.757203	0.0469378	1	down	no
ENSMUSG00000032745	Gpbp1	ENSMUST00000091236;ENSMUST00000136471;ENSMUST00000047627;ENSMUST00000156221;ENSMUST00000129638;ENSMUST00000143331	GO:0003677(DNA binding);GO:0003700(DNA-binding transcription factor activity);GO:0005515(protein binding);GO:0005634(nucleus);GO:0005829(cytosol);GO:0005886(plasma membrane);GO:0006351(transcription, DNA-templated);GO:0006355(regulation of transcription, DNA-templated);GO:0043231(intracellular membrane-bounded organelle);GO:0045893(positive regulation of transcription, DNA-templated);GO:0045893(p…	NA	NA	NA	GC-rich promoter binding protein 1 [Source:MGI Symbol;Acc:MGI:1920524]	protein_coding;nonsense_mediated_decay;processed_transcript;retained_intron	16.1023	17.9022	17.2748	13.3777	10.9374	13.2084	1.36659	0.450582	0.0471623	1	up	no
ENSMUSG00000044068	Zrsr1	ENSMUST00000229075;ENSMUST00000230879;ENSMUST00000049506	GO:0000398(mRNA splicing, via spliceosome);GO:0003676(nucleic acid binding);GO:0003723(RNA binding);GO:0005634(nucleus);GO:0005681(spliceosomal complex);GO:0005689(U12-type spliceosomal complex);GO:0006397(mRNA processing);GO:0008380(RNA splicing);GO:0019013(viral nucleocapsid);GO:0030628(pre-mRNA 3'-splice site binding);GO:0046872(metal ion binding);GO:0089701(U2AF);GO:0089701(U2AF)	NA	NA	NA	zinc finger (CCCH type), RNA binding motif and serine/arginine rich 1 [Source:MGI Symbol;Acc:MGI:98885]	transcribed_processed_pseudogene;processed_transcript;protein_coding	4.9597	5.1124	4.22255	3.0632	2.95455	3.44171	1.51115	0.595647	0.0472699	1	up	no
ENSMUSG00000026743	Mllt10	ENSMUST00000114671;ENSMUST00000133649;ENSMUST00000114680;ENSMUST00000148229;ENSMUST00000150422;ENSMUST00000114669;ENSMUST00000153279;ENSMUST00000149786;ENSMUST00000155352;ENSMUST00000028076;ENSMUST00000154041	GO:0003682(chromatin binding);GO:0005515(protein binding);GO:0005634(nucleus);GO:0005654(nucleoplasm);GO:0005829(cytosol);GO:0031491(nucleosome binding);GO:0032991(protein-containing complex);GO:0042393(histone binding);GO:0045944(positive regulation of transcription by RNA polymerase II);GO:0046872(metal ion binding);GO:0046872(metal ion binding)	NA	NA	NA	myeloid/lymphoid or mixed-lineage leukemia; translocated to, 10 [Source:MGI Symbol;Acc:MGI:1329038]	protein_coding;processed_transcript	6.22557	5.58714	10.0331	4.37902	4.77005	5.494	1.49188	0.577136	0.0472817	1	up	no
ENSMUSG00000051855	Mest	ENSMUST00000163949;ENSMUST00000157040;ENSMUST00000141130;ENSMUST00000137521;ENSMUST00000115127;ENSMUST00000131465;ENSMUST00000124665;ENSMUST00000151777;ENSMUST00000130751;ENSMUST00000147400;ENSMUST00000149496	GO:0003824(catalytic activity);GO:0005783(endoplasmic reticulum);GO:0005789(endoplasmic reticulum membrane);GO:0010883(regulation of lipid storage);GO:0016020(membrane);GO:0016021(integral component of membrane);GO:0016787(hydrolase activity);GO:0032526(response to retinoic acid);GO:0032526(response to retinoic acid)	NA	NA	NA	mesoderm specific transcript [Source:MGI Symbol;Acc:MGI:96968]	protein_coding;retained_intron;processed_transcript	4.14635	3.7937	5.64805	7.23545	4.5327	9.38655	0.642321	-0.638633	0.0472861	1	down	no
ENSMUSG00000029283	Cdc7	ENSMUST00000118261;ENSMUST00000117196;ENSMUST00000140378;ENSMUST00000031221;ENSMUST00000076467;ENSMUST00000123546;ENSMUST00000199223;ENSMUST00000129938	GO:0000166(nucleotide binding);GO:0000727(double-strand break repair via break-induced replication);GO:0004672(protein kinase activity);GO:0004674(protein serine/threonine kinase activity);GO:0005524(ATP binding);GO:0005634(nucleus);GO:0005654(nucleoplasm);GO:0005737(cytoplasm);GO:0006468(protein phosphorylation);GO:0007049(cell cycle);GO:0008284(positive regulation of cell population proliferati…	04110(Cell cycle);04110(Cell cycle)	K02214	EC:2.7.11.1	cell division cycle 7 (S. cerevisiae) [Source:MGI Symbol;Acc:MGI:1309511]	protein_coding;retained_intron;processed_transcript;nonsense_mediated_decay	3.73858	2.54081	2.99948	4.03413	4.3461	5.74256	0.657015	-0.606003	0.0475014	1	down	no
ENSMUSG00000050107	Haspin	ENSMUST00000052140	GO:0004672(protein kinase activity);GO:0005524(ATP binding);GO:0005634(nucleus);GO:0005654(nucleoplasm);GO:0005813(centrosome);GO:0005819(spindle);GO:0006468(protein phosphorylation);GO:0007064(mitotic sister chromatid cohesion);GO:0035556(intracellular signal transduction);GO:0071459(protein localization to chromosome, centromeric region);GO:0072354(histone kinase activity (H3-T3 specific));GO:2…	NA	K16315	EC:2.7.11.1	histone H3 associated protein kinase [Source:MGI Symbol;Acc:MGI:1194498]	protein_coding	1.81942	1.69123	1.83854	2.45475	2.84509	3.45259	0.611165	-0.710366	0.0475175	1	down	no
ENSMUSG00000023025	Larp4	ENSMUST00000100206;ENSMUST00000230956;ENSMUST00000230521;ENSMUST00000231160;ENSMUST00000229891;ENSMUST00000229553;ENSMUST00000231128;ENSMUST00000229426;ENSMUST00000057632	GO:0003676(nucleic acid binding);GO:0003723(RNA binding);GO:0005829(cytosol);GO:0005844(polysome);GO:0007010(cytoskeleton organization);GO:0008143(poly(A) binding);GO:0010494(cytoplasmic stress granule);GO:0022604(regulation of cell morphogenesis);GO:0022627(cytosolic small ribosomal subunit);GO:0045727(positive regulation of translation);GO:0045727(positive regulation of translation)	NA	K18763	NA	La ribonucleoprotein domain family, member 4 [Source:MGI Symbol;Acc:MGI:2443114]	protein_coding;nonsense_mediated_decay;retained_intron;processed_transcript	3.92638	3.49843	4.11883	2.48891	2.91435	2.75513	1.41494	0.500743	0.0476983	1	up	no
ENSMUSG00000047777	Phf13	ENSMUST00000055688	GO:0000278(mitotic cell cycle);GO:0003682(chromatin binding);GO:0005634(nucleus);GO:0005654(nucleoplasm);GO:0006325(chromatin organization);GO:0007049(cell cycle);GO:0007059(chromosome segregation);GO:0007076(mitotic chromosome condensation);GO:0030261(chromosome condensation);GO:0046872(metal ion binding);GO:0051301(cell division)	NA	NA	NA	PHD finger protein 13 [Source:MGI Symbol;Acc:MGI:2446217]	protein_coding	27.5712	34.754	18.6158	33.8284	35.936	40.2977	0.735412	-0.443375	0.0478107	1	down	no
ENSMUSG00000032890	Rims3	ENSMUST00000071093;ENSMUST00000132895;ENSMUST00000171363;ENSMUST00000106283	GO:0006836(neurotransmitter transport);GO:0006887(exocytosis);GO:0016020(membrane);GO:0017137(Rab GTPase binding);GO:0017156(calcium-ion regulated exocytosis);GO:0030054(cell junction);GO:0042391(regulation of membrane potential);GO:0042734(presynaptic membrane);GO:0044325(ion channel binding);GO:0045202(synapse);GO:0048167(regulation of synaptic plasticity);GO:0048788(cytoskeleton of presynaptic…	NA	K15298	NA	regulating synaptic membrane exocytosis 3 [Source:MGI Symbol;Acc:MGI:2443331]	protein_coding;processed_transcript	0.437336	0.291704	0.285196	0.171761	0.198705	0.149591	1.95024	0.963652	0.0479244	1	up	no
ENSMUSG00000051550	Zfp579	ENSMUST00000160225;ENSMUST00000162731;ENSMUST00000162502;ENSMUST00000108572;ENSMUST00000160808;ENSMUST00000159754	GO:0003676(nucleic acid binding);GO:0003677(DNA binding);GO:0005634(nucleus);GO:0008150(biological_process);GO:0046872(metal ion binding);GO:0046872(metal ion binding)	NA	NA	NA	zinc finger protein 579 [Source:MGI Symbol;Acc:MGI:1915740]	processed_transcript;protein_coding	9.24322	5.04079	6.35815	10.088	7.22148	13.5423	0.669075	-0.579761	0.0486756	1	down	no
ENSMUSG00000028581	Laptm5	ENSMUST00000151698;ENSMUST00000030316;ENSMUST00000139023;ENSMUST00000125332;ENSMUST00000136082;ENSMUST00000123550;ENSMUST00000156225;ENSMUST00000143450;ENSMUST00000156170;ENSMUST00000156742	GO:0005764(lysosome);GO:0005765(lysosomal membrane);GO:0016020(membrane);GO:0016021(integral component of membrane);GO:1990830(cellular response to leukemia inhibitory factor);GO:1990830(cellular response to leukemia inhibitory factor)	04142(Lysosome);04142(Lysosome)	K12387	NA	lysosomal-associated protein transmembrane 5 [Source:MGI Symbol;Acc:MGI:108046]	protein_coding;processed_transcript	11.8421	10.0571	10.8576	13.243	19.4079	12.1735	0.730781	-0.452489	0.0488344	1	down	no
ENSMUSG00000030037	Mrpl53	ENSMUST00000129656;ENSMUST00000113938	GO:0003674(molecular_function);GO:0005739(mitochondrion);GO:0005762(mitochondrial large ribosomal subunit);GO:0005840(ribosome);GO:0008150(biological_process);GO:0008150(biological_process)	NA	K17434	NA	mitochondrial ribosomal protein L53 [Source:MGI Symbol;Acc:MGI:1915749]	retained_intron;protein_coding	1.43824	1.89219	2.24542	3.24383	4.13959	3.10555	0.531593	-0.911607	0.0488982	1	down	no
ENSMUSG00000028211	Trp53inp1	ENSMUST00000132010;ENSMUST00000029865;ENSMUST00000132693;ENSMUST00000132346	GO:0000045(autophagosome assembly);GO:0005634(nucleus);GO:0005737(cytoplasm);GO:0005776(autophagosome);GO:0005829(cytosol);GO:0006355(regulation of transcription, DNA-templated);GO:0006914(autophagy);GO:0006915(apoptotic process);GO:0007050(cell cycle arrest);GO:0008285(negative regulation of cell population proliferation);GO:0009408(response to heat);GO:0010506(regulation of autophagy);GO:001050…	NA	K15310	NA	transformation related protein 53 inducible nuclear protein 1 [Source:MGI Symbol;Acc:MGI:1926609]	processed_transcript;protein_coding	23.0984	15.9807	16.1224	12.6851	14.7038	12.3308	1.38977	0.47485	0.0493628	1	up	no
ENSMUSG00000035372	1810055G02Rik	ENSMUST00000039048;ENSMUST00000237955;ENSMUST00000237320;ENSMUST00000235837;ENSMUST00000235763;ENSMUST00000235295	GO:0003674(molecular_function);GO:0005575(cellular_component);GO:0005794(Golgi apparatus);GO:0005886(plasma membrane);GO:0008150(biological_process);GO:0016020(membrane);GO:0016021(integral component of membrane);GO:0016021(integral component of membrane)	NA	NA	NA	RIKEN cDNA 1810055G02 gene [Source:MGI Symbol;Acc:MGI:1919306]	protein_coding;processed_transcript	14.875	5.5713	10.2333	5.74997	6.26553	6.71435	1.63801	0.711943	0.0493952	1	up	no
ENSMUSG00000006527	Sfmbt1	ENSMUST00000112184;ENSMUST00000054230;ENSMUST00000228006;ENSMUST00000227201;ENSMUST00000227303;ENSMUST00000227445	GO:0003682(chromatin binding);GO:0003714(transcription corepressor activity);GO:0005515(protein binding);GO:0005634(nucleus);GO:0005654(nucleoplasm);GO:0006325(chromatin organization);GO:0006355(regulation of transcription, DNA-templated);GO:0007283(spermatogenesis);GO:0030154(cell differentiation);GO:0042393(histone binding);GO:0045892(negative regulation of transcription, DNA-templated);GO:0048…	NA	NA	NA	Scm-like with four mbt domains 1 [Source:MGI Symbol;Acc:MGI:1859609]	protein_coding;retained_intron	3.63539	2.79384	3.10511	1.37725	1.4459	3.12772	1.60218	0.680033	0.0495432	1	up	no
ENSMUSG00000002835	Chaf1a	ENSMUST00000002914;ENSMUST00000233325;ENSMUST00000232828	GO:0000790(nuclear chromatin);GO:0005515(protein binding);GO:0005634(nucleus);GO:0006260(DNA replication);GO:0006281(DNA repair);GO:0006334(nucleosome assembly);GO:0006335(DNA replication-dependent nucleosome assembly);GO:0006974(cellular response to DNA damage stimulus);GO:0007049(cell cycle);GO:0031497(chromatin assembly);GO:0032991(protein-containing complex);GO:0033186(CAF-1 complex);GO:00428…	NA	K10750	NA	chromatin assembly factor 1, subunit A (p150) [Source:MGI Symbol;Acc:MGI:1351331]	protein_coding;retained_intron	4.15156	3.77701	3.99678	4.64982	5.15384	6.30117	0.740482	-0.433463	0.0495778	1	down	no
ENSMUSG00000030711	Sult1a1	ENSMUST00000106373;ENSMUST00000106372;ENSMUST00000155419	GO:0008146(sulfotransferase activity);GO:0016740(transferase activity);GO:0016740(transferase activity)	05204(Chemical carcinogenesis);05204(Chemical carcinogenesis)	K01014	EC:2.8.2.1	sulfotransferase family 1A, phenol-preferring, member 1 [Source:MGI Symbol;Acc:MGI:102896]	protein_coding	23.5244	14.2023	10.0948	7.29939	12.8895	8.7412	1.653	0.72509	0.0498601	1	up	no
ENSMUSG00000021134	Srsf5	ENSMUST00000094693;ENSMUST00000110356;ENSMUST00000151036;ENSMUST00000110351;ENSMUST00000125814;ENSMUST00000153056;ENSMUST00000133783;ENSMUST00000110352;ENSMUST00000152662;ENSMUST00000110354;ENSMUST00000138434;ENSMUST00000151968	GO:0000381(regulation of alternative mRNA splicing, via spliceosome);GO:0001889(liver development);GO:0003676(nucleic acid binding);GO:0003723(RNA binding);GO:0003729(mRNA binding);GO:0005515(protein binding);GO:0005634(nucleus);GO:0005654(nucleoplasm);GO:0005730(nucleolus);GO:0005829(cytosol);GO:0006397(mRNA processing);GO:0008380(RNA splicing);GO:0009611(response to wounding);GO:0016607(nuclear…	03040(Spliceosome);05168(Herpes simplex virus 1 infection);05168(Herpes simplex virus 1 infection)	K12893	NA	serine and arginine-rich splicing factor 5 [Source:MGI Symbol;Acc:MGI:98287]	protein_coding;retained_intron;processed_transcript;nonsense_mediated_decay	69.5634	70.8137	74.8173	51.7608	50.7144	56.4289	1.35424	0.437484	0.0498695	1	up	no
ENSMUSG00000019992	Mtfr2	ENSMUST00000169712;ENSMUST00000213374;ENSMUST00000217608	GO:0000266(mitochondrial fission);GO:0003674(molecular_function);GO:0005739(mitochondrion);GO:0007005(mitochondrion organization);GO:0009060(aerobic respiration);GO:0009060(aerobic respiration)	NA	NA	NA	mitochondrial fission regulator 2 [Source:MGI Symbol;Acc:MGI:1919054]	protein_coding;processed_transcript	1.76412	2.15784	1.88192	3.12313	2.74167	3.74335	0.604058	-0.72724	0.050132	1	down	no
ENSMUSG00000067736	Gm10222	ENSMUST00000088336	NA	NA	NA	NA	predicted gene 10222 [Source:MGI Symbol;Acc:MGI:3642643]	unprocessed_pseudogene	689.479	530.521	440.683	440.715	381.733	364.078	1.39962	0.485034	0.0502196	1	up	no
ENSMUSG00000096458	Moap1	ENSMUST00000178384;ENSMUST00000173760	GO:0001844(protein insertion into mitochondrial membrane involved in apoptotic signaling pathway);GO:0005515(protein binding);GO:0005634(nucleus);GO:0005737(cytoplasm);GO:0005739(mitochondrion);GO:0005741(mitochondrial outer membrane);GO:0005829(cytosol);GO:0006915(apoptotic process);GO:0008625(extrinsic apoptotic signaling pathway via death domain receptors);GO:0008630(intrinsic apoptotic signal…	NA	NA	NA	modulator of apoptosis 1 [Source:MGI Symbol;Acc:MGI:1915555]	protein_coding	2.14625	1.40026	2.22856	1.04921	0.490482	0.0001	3.75056	1.90711	0.0502401	1	up	no
ENSMUSG00000036777	Anln	ENSMUST00000040912;ENSMUST00000216897;ENSMUST00000215486;ENSMUST00000216793;ENSMUST00000215006;ENSMUST00000217010	GO:0000281(mitotic cytokinesis);GO:0000915(actomyosin contractile ring assembly);GO:0002244(hematopoietic progenitor cell differentiation);GO:0003779(actin binding);GO:0005634(nucleus);GO:0005654(nucleoplasm);GO:0005737(cytoplasm);GO:0005826(actomyosin contractile ring);GO:0005856(cytoskeleton);GO:0005938(cell cortex);GO:0007049(cell cycle);GO:0015629(actin cytoskeleton);GO:0017049(GTP-Rho bindin…	NA	K18621	NA	anillin, actin binding protein [Source:MGI Symbol;Acc:MGI:1920174]	protein_coding;retained_intron	2.78212	2.9294	2.66096	3.44782	3.64548	4.50977	0.721574	-0.470781	0.0503358	1	down	no
ENSMUSG00000037017	Zscan21	ENSMUST00000110961;ENSMUST00000110959;ENSMUST00000062350;ENSMUST00000080732;ENSMUST00000142185;ENSMUST00000110960;ENSMUST00000136425	GO:0000978(RNA polymerase II cis-regulatory region sequence-specific DNA binding);GO:0001228(DNA-binding transcription activator activity, RNA polymerase II-specific);GO:0003676(nucleic acid binding);GO:0003677(DNA binding);GO:0003700(DNA-binding transcription factor activity);GO:0005634(nucleus);GO:0006355(regulation of transcription, DNA-templated);GO:0007275(multicellular organism development)…	NA	NA	NA	zinc finger and SCAN domain containing 21 [Source:MGI Symbol;Acc:MGI:99182]	protein_coding	7.36447	9.27683	13.4381	13.6864	14.058	15.3795	0.697513	-0.519709	0.0504505	1	down	no
ENSMUSG00000069516	Lyz2	ENSMUST00000092163	GO:0000137(Golgi cis cisterna);GO:0003796(lysozyme activity);GO:0003824(catalytic activity);GO:0005576(extracellular region);GO:0005615(extracellular space);GO:0005737(cytoplasm);GO:0005788(endoplasmic reticulum lumen);GO:0005795(Golgi stack);GO:0005902(microvillus);GO:0008152(metabolic process);GO:0016787(hydrolase activity);GO:0016798(hydrolase activity, acting on glycosyl bonds);GO:0019835(cyt…	04970(Salivary secretion)	K13915	EC:3.2.1.17	lysozyme 2 [Source:MGI Symbol;Acc:MGI:96897]	protein_coding	154.478	126.21	158.943	199.032	280.511	142.497	0.706756	-0.500715	0.0510865	1	down	no
ENSMUSG00000043639	Rbm20	ENSMUST00000164202;ENSMUST00000162910;ENSMUST00000161856	GO:0003676(nucleic acid binding);GO:0003723(RNA binding);GO:0003729(mRNA binding);GO:0005634(nucleus);GO:0006397(mRNA processing);GO:0006417(regulation of translation);GO:0007507(heart development);GO:0008270(zinc ion binding);GO:0008380(RNA splicing);GO:0033120(positive regulation of RNA splicing);GO:0043484(regulation of RNA splicing);GO:0043484(regulation of RNA splicing)	NA	NA	NA	RNA binding motif protein 20 [Source:MGI Symbol;Acc:MGI:1920963]	protein_coding;nonsense_mediated_decay	0.951415	0.79009	0.491103	0.638235	2.05689	1.37279	0.548835	-0.865555	0.0511908	1	down	no
ENSMUSG00000039285	Azi2	ENSMUST00000135251;ENSMUST00000044454;ENSMUST00000143024;ENSMUST00000134433;ENSMUST00000127189;ENSMUST00000133814;ENSMUST00000154583;ENSMUST00000130735;ENSMUST00000123690;ENSMUST00000133580	GO:0000278(mitotic cell cycle);GO:0001816(cytokine production);GO:0005515(protein binding);GO:0005737(cytoplasm);GO:0007249(I-kappaB kinase/NF-kappaB signaling);GO:0032607(interferon-alpha production);GO:0032609(interferon-gamma production);GO:0032635(interleukin-6 production);GO:0032640(tumor necrosis factor production);GO:0042110(T cell activation);GO:0044565(dendritic cell proliferation);GO:00…	04622(RIG-I-like receptor signaling pathway);04622(RIG-I-like receptor signaling pathway)	NA	NA	5-azacytidine induced gene 2 [Source:MGI Symbol;Acc:MGI:1351332]	protein_coding;retained_intron;nonsense_mediated_decay	4.56334	3.91372	7.12311	3.50647	3.39847	3.43383	1.5089	0.593497	0.0513387	1	up	no
ENSMUSG00000113265	Gm30198	ENSMUST00000222873	NA	NA	NA	NA	predicted gene, 30198 [Source:MGI Symbol;Acc:MGI:5589357]	lincRNA	1.88499	1.4351	1.04162	0.577058	1.04681	0.202267	2.38849	1.2561	0.0513764	1	up	no
ENSMUSG00000024425	Ndfip1	ENSMUST00000235458;ENSMUST00000025293;ENSMUST00000236085;ENSMUST00000236480;ENSMUST00000236171;ENSMUST00000238135;ENSMUST00000236803;ENSMUST00000236052	GO:0000139(Golgi membrane);GO:0002761(regulation of myeloid leukocyte differentiation);GO:0002829(negative regulation of type 2 immune response);GO:0005515(protein binding);GO:0005576(extracellular region);GO:0005768(endosome);GO:0005783(endoplasmic reticulum);GO:0005794(Golgi apparatus);GO:0005938(cell cortex);GO:0006511(ubiquitin-dependent protein catabolic process);GO:0006879(cellular iron ion…	NA	NA	NA	Nedd4 family interacting protein 1 [Source:MGI Symbol;Acc:MGI:1929601]	retained_intron;protein_coding;nonsense_mediated_decay	35.2002	40.0289	34.2238	24.7942	24.9729	30.862	1.35749	0.440938	0.0514571	1	up	no
ENSMUSG00000006369	Fbln1	ENSMUST00000109432;ENSMUST00000057410;ENSMUST00000160798	GO:0001933(negative regulation of protein phosphorylation);GO:0001968(fibronectin binding);GO:0005178(integrin binding);GO:0005201(extracellular matrix structural constituent);GO:0005509(calcium ion binding);GO:0005515(protein binding);GO:0005576(extracellular region);GO:0005604(basement membrane);GO:0005615(extracellular space);GO:0007162(negative regulation of cell adhesion);GO:0007566(embryo i…	NA	K17307	NA	fibulin 1 [Source:MGI Symbol;Acc:MGI:95487]	protein_coding;processed_transcript	46.8238	38.383	32.7035	46.2261	44.0062	71.6662	0.728298	-0.457399	0.0517289	1	down	no
ENSMUSG00000064370	mt-Cytb	ENSMUST00000082421	GO:0001666(response to hypoxia);GO:0005739(mitochondrion);GO:0005743(mitochondrial inner membrane);GO:0006122(mitochondrial electron transport, ubiquinol to cytochrome c);GO:0007584(response to nutrient);GO:0008121(ubiquinol-cytochrome-c reductase activity);GO:0009055(electron transfer activity);GO:0009408(response to heat);GO:0009636(response to toxic substance);GO:0009725(response to hormone);G…	00190(Oxidative phosphorylation);04260(Cardiac muscle contraction);04714(Thermogenesis);04932(Non-alcoholic fatty liver disease (NAFLD));05010(Alzheimer disease);05012(Parkinson disease);05016(Huntington disease)	K00412	NA	mitochondrially encoded cytochrome b [Source:MGI Symbol;Acc:MGI:102501]	protein_coding	2384.28	2296.17	2090.86	1637.82	1633.18	1733.32	1.35309	0.436261	0.0520104	1	up	no
ENSMUSG00000113536	Gm49327	ENSMUST00000221539;ENSMUST00000221062;ENSMUST00000221109	NA	NA	NA	NA	predicted gene, 49327 [Source:MGI Symbol;Acc:MGI:6121512]	processed_transcript;transcribed_unprocessed_pseudogene	3.77641	1.59014	2.28554	1.16778	1.28518	1.68105	1.85101	0.888313	0.052255	1	up	no
ENSMUSG00000100774	Gm7329	ENSMUST00000185915	NA	NA	NA	NA	predicted gene 7329 [Source:MGI Symbol;Acc:MGI:3646271]	processed_pseudogene	4.25128	28.3854	7.35799	68.9561	56.9724	1.79872	0.313126	-1.67519	0.0526927	1	down	no
ENSMUSG00000084847	Gm15507	ENSMUST00000140958;ENSMUST00000140263;ENSMUST00000133523	NA	NA	NA	NA	predicted gene 15507 [Source:MGI Symbol;Acc:MGI:3782955]	lincRNA	1.06151	0.853371	0.4378	0.22396	0.491514	0.350457	2.20716	1.14219	0.0527048	1	up	no
ENSMUSG00000072244	Trim6	ENSMUST00000098180;ENSMUST00000144538;ENSMUST00000128493;ENSMUST00000144455;ENSMUST00000214578;ENSMUST00000153324	GO:0000209(protein polyubiquitination);GO:0002230(positive regulation of defense response to virus by host);GO:0002720(positive regulation of cytokine production involved in immune response);GO:0005515(protein binding);GO:0005634(nucleus);GO:0005654(nucleoplasm);GO:0005737(cytoplasm);GO:0005829(cytosol);GO:0008134(transcription factor binding);GO:0008270(zinc ion binding);GO:0010468(regulation of…	NA	K11999	NA	tripartite motif-containing 6 [Source:MGI Symbol;Acc:MGI:2137352]	protein_coding;retained_intron	1.08836	0.61066	0.627871	0.354015	0.39676	0.504511	1.85367	0.890385	0.0527439	1	up	no
ENSMUSG00000113637	Gm7049	ENSMUST00000223520	NA	NA	NA	NA	predicted gene 7049 [Source:MGI Symbol;Acc:MGI:3646400]	processed_pseudogene	3.67975	2.71612	4.95456	1.43569	1.70937	3.08181	1.82281	0.866167	0.0530108	1	up	no
ENSMUSG00000024791	Cdca5	ENSMUST00000025704;ENSMUST00000152528;ENSMUST00000156961	GO:0000278(mitotic cell cycle);GO:0000785(chromatin);GO:0000790(nuclear chromatin);GO:0005515(protein binding);GO:0005634(nucleus);GO:0005654(nucleoplasm);GO:0005694(chromosome);GO:0005737(cytoplasm);GO:0006302(double-strand break repair);GO:0007049(cell cycle);GO:0007064(mitotic sister chromatid cohesion);GO:0007076(mitotic chromosome condensation);GO:0007080(mitotic metaphase plate congression)…	05206(MicroRNAs in cancer);05206(MicroRNAs in cancer)	K17390	NA	cell division cycle associated 5 [Source:MGI Symbol;Acc:MGI:1915099]	protein_coding;processed_transcript	6.84495	6.56568	5.89371	7.6249	10.0426	10.6468	0.681789	-0.552603	0.0534778	1	down	no
ENSMUSG00000031258	Xkrx	ENSMUST00000033611;ENSMUST00000148722	GO:0003674(molecular_function);GO:0005575(cellular_component);GO:0008150(biological_process);GO:0016020(membrane);GO:0016021(integral component of membrane);GO:0016021(integral component of membrane)	NA	NA	NA	X-linked Kx blood group related, X-linked [Source:MGI Symbol;Acc:MGI:3584011]	protein_coding;processed_transcript	0.237427	0.628893	0.417408	0.207123	0.171123	0.226776	2.12179	1.08528	0.0536114	1	up	no
ENSMUSG00000038037	Socs1	ENSMUST00000038099;ENSMUST00000229866	GO:0001932(regulation of protein phosphorylation);GO:0005159(insulin-like growth factor receptor binding);GO:0005515(protein binding);GO:0005634(nucleus);GO:0005654(nucleoplasm);GO:0005737(cytoplasm);GO:0005829(cytosol);GO:0005942(phosphatidylinositol 3-kinase complex);GO:0007259(receptor signaling pathway via JAK-STAT);GO:0009968(negative regulation of signal transduction);GO:0010533(regulation …	04120(Ubiquitin mediated proteolysis);04380(Osteoclast differentiation);04630(Jak-STAT signaling pathway);04910(Insulin signaling pathway);04917(Prolactin signaling pathway);04930(Type II diabetes mellitus);05145(Toxoplasmosis);05206(MicroRNAs in cancer);05206(MicroRNAs in cancer)	K04694	NA	suppressor of cytokine signaling 1 [Source:MGI Symbol;Acc:MGI:1354910]	protein_coding	0.984584	1.59913	1.08925	1.10907	3.45278	2.1997	0.543213	-0.88041	0.0536168	1	down	no
ENSMUSG00000104028	Gm5851	ENSMUST00000194132	NA	NA	NA	NA	predicted gene 5851 [Source:MGI Symbol;Acc:MGI:3645652]	processed_pseudogene	3.96471	4.77255	5.49002	3.20144	2.12575	2.76282	1.75862	0.814448	0.0536453	1	up	no
ENSMUSG00000051159	Cited1	ENSMUST00000101336;ENSMUST00000050551;ENSMUST00000136277;ENSMUST00000134887;ENSMUST00000130589	GO:0000578(embryonic axis specification);GO:0001570(vasculogenesis);GO:0001658(branching involved in ureteric bud morphogenesis);GO:0001890(placenta development);GO:0003340(negative regulation of mesenchymal to epithelial transition involved in metanephros morphogenesis);GO:0003682(chromatin binding);GO:0003713(transcription coactivator activity);GO:0005515(protein binding);GO:0005634(nucleus);GO…	NA	K22527	NA	Cbp/p300-interacting transactivator with Glu/Asp-rich carboxy-terminal domain 1 [Source:MGI Symbol;Acc:MGI:108023]	protein_coding	3.83936	3.18282	5.11762	8.25118	9.45847	3.45482	0.573593	-0.8019	0.0540589	1	down	no
ENSMUSG00000062510	Nsl1	ENSMUST00000078259;ENSMUST00000076952;ENSMUST00000139340	GO:0000070(mitotic sister chromatid segregation);GO:0000444(MIS12/MIND type complex);GO:0000776(kinetochore);GO:0000777(condensed chromosome kinetochore);GO:0016607(nuclear speck);GO:0016607(nuclear speck)	NA	K11545	NA	NSL1, MIS12 kinetochore complex component [Source:MGI Symbol;Acc:MGI:2685830]	protein_coding	1.86408	1.52453	1.58927	2.70464	1.88526	3.15936	0.642369	-0.638526	0.0541763	1	down	no
ENSMUSG00000019851	Perp	ENSMUST00000019998	GO:0002934(desmosome organization);GO:0005739(mitochondrion);GO:0005794(Golgi apparatus);GO:0005886(plasma membrane);GO:0005887(integral component of plasma membrane);GO:0005911(cell-cell junction);GO:0006915(apoptotic process);GO:0007155(cell adhesion);GO:0007219(Notch signaling pathway);GO:0016020(membrane);GO:0016021(integral component of membrane);GO:0030054(cell junction);GO:0030057(desmosom…	04115(p53 signaling pathway)	K10136	NA	PERP, TP53 apoptosis effector [Source:MGI Symbol;Acc:MGI:1929938]	protein_coding	9.12129	8.44338	7.31671	9.65658	11.9917	14.3994	0.690235	-0.53484	0.0542889	1	down	no
ENSMUSG00000070529	Wfdc10	ENSMUST00000094344	GO:0004867(serine-type endopeptidase inhibitor activity);GO:0005576(extracellular region);GO:0005615(extracellular space);GO:0010466(negative regulation of peptidase activity);GO:0010951(negative regulation of endopeptidase activity);GO:0019731(antibacterial humoral response);GO:0030414(peptidase inhibitor activity);GO:0045087(innate immune response)	NA	NA	NA	WAP four-disulfide core domain 10 [Source:MGI Symbol;Acc:MGI:3616889]	protein_coding	24.0022	23.4829	15.6817	20.0855	45.4594	35.9896	0.622122	-0.684731	0.0544444	1	down	no
ENSMUSG00000098915	Rpl15-ps2	ENSMUST00000184247	NA	NA	NA	NA	ribosomal protein L15, pseudogene 2 [Source:MGI Symbol;Acc:MGI:3648255]	processed_pseudogene	5.60115	5.07077	4.53486	10.6145	6.65907	8.44774	0.591213	-0.758249	0.0545741	1	down	no
ENSMUSG00000059810	Rgs3	ENSMUST00000098031;ENSMUST00000142684;ENSMUST00000144489;ENSMUST00000107424;ENSMUST00000127254;ENSMUST00000125369;ENSMUST00000084521;ENSMUST00000126338;ENSMUST00000153875;ENSMUST00000065870;ENSMUST00000107420;ENSMUST00000143042;ENSMUST00000124082;ENSMUST00000138674;ENSMUST00000146083;ENSMUST00000154071;ENSMUST00000142565	GO:0005096(GTPase activator activity);GO:0005515(protein binding);GO:0005634(nucleus);GO:0005737(cytoplasm);GO:0005886(plasma membrane);GO:0007165(signal transduction);GO:0007186(G protein-coupled receptor signaling pathway);GO:0009968(negative regulation of signal transduction);GO:0016020(membrane);GO:0043547(positive regulation of GTPase activity);GO:0043547(positive regulation of GTPase activi…	04360(Axon guidance);04360(Axon guidance)	K07524	NA	regulator of G-protein signaling 3 [Source:MGI Symbol;Acc:MGI:1354734]	protein_coding;retained_intron;processed_transcript	11.3393	11.0521	8.64071	6.24144	7.52327	8.98147	1.36428	0.448138	0.0548295	1	up	no
ENSMUSG00000027375	Mal	ENSMUST00000028854;ENSMUST00000028853	GO:0000139(Golgi membrane);GO:0002175(protein localization to paranode region of axon);GO:0005783(endoplasmic reticulum);GO:0005794(Golgi apparatus);GO:0005886(plasma membrane);GO:0016020(membrane);GO:0016021(integral component of membrane);GO:0016324(apical plasma membrane);GO:0019898(extrinsic component of membrane);GO:0019911(structural constituent of myelin sheath);GO:0042552(myelination);GO:…	NA	NA	NA	myelin and lymphocyte protein, T cell differentiation protein [Source:MGI Symbol;Acc:MGI:892970]	protein_coding	4.72432	3.08579	3.06896	1.4561	2.13668	2.82411	1.69538	0.761612	0.0554878	1	up	no
ENSMUSG00000022755	Adgrg7	ENSMUST00000023437	GO:0004888(transmembrane signaling receptor activity);GO:0004930(G protein-coupled receptor activity);GO:0005887(integral component of plasma membrane);GO:0007165(signal transduction);GO:0007166(cell surface receptor signaling pathway);GO:0007186(G protein-coupled receptor signaling pathway);GO:0007189(adenylate cyclase-activating G protein-coupled receptor signaling pathway);GO:0016020(membrane)…	NA	K08464	NA	adhesion G protein-coupled receptor G7 [Source:MGI Symbol;Acc:MGI:2441732]	protein_coding	5.9127	4.48793	2.22026	1.60291	2.76602	2.74565	1.77395	0.826964	0.0558867	1	up	no
ENSMUSG00000049823	Zbtb12	ENSMUST00000173093;ENSMUST00000052778	GO:0000978(RNA polymerase II cis-regulatory region sequence-specific DNA binding);GO:0003676(nucleic acid binding);GO:0005515(protein binding);GO:0005654(nucleoplasm);GO:0006357(regulation of transcription by RNA polymerase II);GO:1990837(sequence-specific double-stranded DNA binding);GO:1990837(sequence-specific double-stranded DNA binding)	NA	K10499	NA	zinc finger and BTB domain containing 12 [Source:MGI Symbol;Acc:MGI:88133]	protein_coding	16.1262	4.02676	11.3355	19.5938	17.7466	15.3273	0.597871	-0.742093	0.0559009	1	down	no
ENSMUSG00000110317	Gm45250	ENSMUST00000209414	NA	NA	NA	NA	predicted gene 45250 [Source:MGI Symbol;Acc:MGI:5791086]	lincRNA	2.40826	2.05262	2.14893	1.12975	1.57404	1.25545	1.66946	0.739383	0.0559514	1	up	no
ENSMUSG00000089670	Gm16581	ENSMUST00000160730	NA	NA	NA	NA	predicted gene 16581 [Source:MGI Symbol;Acc:MGI:4415001]	processed_pseudogene	1.32273	2.06129	1.01869	0.771939	0.593958	0.802181	2.0307	1.02198	0.0561228	1	up	no
ENSMUSG00000074127	Cmtm2a	ENSMUST00000034344;ENSMUST00000212487;ENSMUST00000212492	GO:0003714(transcription corepressor activity);GO:0005125(cytokine activity);GO:0005515(protein binding);GO:0005615(extracellular space);GO:0005634(nucleus);GO:0005737(cytoplasm);GO:0006935(chemotaxis);GO:0007165(signal transduction);GO:0016020(membrane);GO:0016021(integral component of membrane);GO:0045892(negative regulation of transcription, DNA-templated);GO:2000224(regulation of testosterone…	NA	NA	NA	CKLF-like MARVEL transmembrane domain containing 2A [Source:MGI Symbol;Acc:MGI:2447160]	protein_coding;non_stop_decay	15.5492	9.09566	5.95942	3.03921	8.37893	5.16765	1.84521	0.883787	0.0562496	1	up	no
ENSMUSG00000023940	Sgo1	ENSMUST00000024736;ENSMUST00000146019;ENSMUST00000144474	GO:0000070(mitotic sister chromatid segregation);GO:0000775(chromosome, centromeric region);GO:0000776(kinetochore);GO:0000777(condensed chromosome kinetochore);GO:0000779(condensed chromosome, centromeric region);GO:0000780(condensed nuclear chromosome, centromeric region);GO:0000922(spindle pole);GO:0005634(nucleus);GO:0005654(nucleoplasm);GO:0005694(chromosome);GO:0005737(cytoplasm);GO:0005813…	04114(Oocyte meiosis);04114(Oocyte meiosis)	K11580	NA	shugoshin 1 [Source:MGI Symbol;Acc:MGI:1919665]	protein_coding;processed_transcript	2.50252	1.80829	2.25562	3.12903	2.70109	4.49956	0.635686	-0.653613	0.0562873	1	down	no
ENSMUSG00000039804	Ncoa5	ENSMUST00000040381;ENSMUST00000121377;ENSMUST00000127545;ENSMUST00000123347;ENSMUST00000122070;ENSMUST00000153905;ENSMUST00000141663;ENSMUST00000126685	GO:0003682(chromatin binding);GO:0005634(nucleus);GO:0005654(nucleoplasm);GO:0015629(actin cytoskeleton);GO:0042593(glucose homeostasis);GO:0046627(negative regulation of insulin receptor signaling pathway);GO:0046627(negative regulation of insulin receptor signaling pathway)	NA	NA	NA	nuclear receptor coactivator 5 [Source:MGI Symbol;Acc:MGI:2385165]	protein_coding;retained_intron;processed_transcript	8.29445	7.69961	8.3528	17.0119	8.38035	9.4222	0.699332	-0.515951	0.0563741	1	down	no
ENSMUSG00000040048	Ndufb10	ENSMUST00000129451;ENSMUST00000141324;ENSMUST00000045602;ENSMUST00000144285;ENSMUST00000147648;ENSMUST00000135708	GO:0003674(molecular_function);GO:0005739(mitochondrion);GO:0005743(mitochondrial inner membrane);GO:0005747(mitochondrial respiratory chain complex I);GO:0016020(membrane);GO:0032981(mitochondrial respiratory chain complex I assembly);GO:0055114(oxidation-reduction process);GO:0070469(respirasome);GO:0070469(respirasome)	00190(Oxidative phosphorylation);04714(Thermogenesis);04723(Retrograde endocannabinoid signaling);04932(Non-alcoholic fatty liver disease (NAFLD));05010(Alzheimer disease);05012(Parkinson disease);05016(Huntington disease);05016(Huntington disease)	K03966	NA	NADH:ubiquinone oxidoreductase subunit B10 [Source:MGI Symbol;Acc:MGI:1915592]	retained_intron;protein_coding;processed_transcript	67.0304	54.8509	67.2958	41.8794	52.0132	47.409	1.33882	0.42096	0.0565264	1	up	no
ENSMUSG00000039814	Xkr5	ENSMUST00000144987;ENSMUST00000143913;ENSMUST00000152974;ENSMUST00000095438;ENSMUST00000055503	GO:0003674(molecular_function);GO:0005886(plasma membrane);GO:0016020(membrane);GO:0016021(integral component of membrane);GO:0043652(engulfment of apoptotic cell);GO:0070782(phosphatidylserine exposure on apoptotic cell surface);GO:1902742(apoptotic process involved in development);GO:1902742(apoptotic process involved in development)	NA	NA	NA	X-linked Kx blood group related 5 [Source:MGI Symbol;Acc:MGI:2442327]	processed_transcript;nonsense_mediated_decay;protein_coding	0.918299	0.830016	0.800331	1.2418	1.24561	1.72961	0.604371	-0.726495	0.0567355	1	down	no
ENSMUSG00000064340	mt-Tl1	ENSMUST00000082391	NA	NA	NA	NA	mitochondrially encoded tRNA leucine 1 [Source:MGI Symbol;Acc:MGI:102482]	Mt_tRNA	167.198	74.694	172.472	98.9195	70.3758	64.0132	1.77604	0.828662	0.0568745	1	up	no
ENSMUSG00000026249	Serpine2	ENSMUST00000027467;ENSMUST00000190724;ENSMUST00000153862;ENSMUST00000189793;ENSMUST00000191529;ENSMUST00000191026	GO:0004867(serine-type endopeptidase inhibitor activity);GO:0005102(signaling receptor binding);GO:0005539(glycosaminoglycan binding);GO:0005576(extracellular region);GO:0005615(extracellular space);GO:0005829(cytosol);GO:0007275(multicellular organism development);GO:0007399(nervous system development);GO:0007596(blood coagulation);GO:0008201(heparin binding);GO:0008285(negative regulation of ce…	NA	K16643	NA	serine (or cysteine) peptidase inhibitor, clade E, member 2 [Source:MGI Symbol;Acc:MGI:101780]	protein_coding;retained_intron	98.4278	78.1162	60.0348	90.6467	89.9574	149.216	0.717296	-0.479359	0.05689	1	down	no
ENSMUSG00000078202	Nrarp	ENSMUST00000104999	GO:0000122(negative regulation of transcription by RNA polymerase II);GO:0001569(branching involved in blood vessel morphogenesis);GO:0001938(positive regulation of endothelial cell proliferation);GO:0002040(sprouting angiogenesis);GO:0002043(blood vessel endothelial cell proliferation involved in sprouting angiogenesis);GO:0005515(protein binding);GO:0005575(cellular_component);GO:0007219(Notch …	NA	NA	NA	Notch-regulated ankyrin repeat protein [Source:MGI Symbol;Acc:MGI:1914372]	protein_coding	2.09681	2.40118	3.09355	4.49081	4.01814	3.56717	0.628641	-0.669692	0.0569068	1	down	no
ENSMUSG00000086077	Gm14396	ENSMUST00000126966;ENSMUST00000152027	NA	NA	NA	NA	predicted gene 14396 [Source:MGI Symbol;Acc:MGI:3649369]	lincRNA	0.725906	1.2391	0.518638	1.62639	2.20925	1.24101	0.489229	-1.03142	0.0573206	1	down	no
ENSMUSG00000031353	Rbbp7	ENSMUST00000112326;ENSMUST00000112327;ENSMUST00000033720;ENSMUST00000143681;ENSMUST00000138791	GO:0000122(negative regulation of transcription by RNA polymerase II);GO:0003723(RNA binding);GO:0005515(protein binding);GO:0005634(nucleus);GO:0005654(nucleoplasm);GO:0005829(cytosol);GO:0006260(DNA replication);GO:0006325(chromatin organization);GO:0006338(chromatin remodeling);GO:0016581(NuRD complex);GO:0030308(negative regulation of cell growth);GO:0035098(ESC/E(Z) complex);GO:0045892(negat…	NA	K11659	NA	retinoblastoma binding protein 7, chromatin remodeling factor [Source:MGI Symbol;Acc:MGI:1194910]	protein_coding	90.3864	102.962	73.7316	91.9005	155.339	115.147	0.737003	-0.440258	0.057501	1	down	no
ENSMUSG00000057367	Birc2	ENSMUST00000074246;ENSMUST00000190341;ENSMUST00000191248;ENSMUST00000054878;ENSMUST00000189935	GO:0000209(protein polyubiquitination);GO:0001666(response to hypoxia);GO:0001741(XY body);GO:0001890(placenta development);GO:0003713(transcription coactivator activity);GO:0004842(ubiquitin-protein transferase activity);GO:0005515(protein binding);GO:0005634(nucleus);GO:0005737(cytoplasm);GO:0006915(apoptotic process);GO:0008270(zinc ion binding);GO:0009898(cytoplasmic side of plasma membrane);…	01524(Platinum drug resistance);04064(NF-kappa B signaling pathway);04120(Ubiquitin mediated proteolysis);04210(Apoptosis);04215(Apoptosis - multiple species);04217(Necroptosis);04390(Hippo signaling pathway);04510(Focal adhesion);04621(NOD-like receptor signaling pathway);04668(TNF signaling pathway);05145(Toxoplasmosis);05168(Herpes simplex virus 1 infection);05200(Pathways in cancer);05222(Sma…	K16060	NA	baculoviral IAP repeat-containing 2 [Source:MGI Symbol;Acc:MGI:1197009]	protein_coding;processed_transcript;retained_intron	17.1732	14.1133	12.6049	9.8385	11.5364	11.047	1.35376	0.436974	0.0575402	1	up	no
ENSMUSG00000090077	Lime1	ENSMUST00000184328;ENSMUST00000048077;ENSMUST00000108804;ENSMUST00000126611;ENSMUST00000126862;ENSMUST00000126733;ENSMUST00000140943	GO:0002250(adaptive immune response);GO:0002376(immune system process);GO:0005515(protein binding);GO:0005886(plasma membrane);GO:0006357(regulation of transcription by RNA polymerase II);GO:0014066(regulation of phosphatidylinositol 3-kinase signaling);GO:0016020(membrane);GO:0016021(integral component of membrane);GO:0019815(B cell receptor complex);GO:0019901(protein kinase binding);GO:0043122…	NA	NA	NA	Lck interacting transmembrane adaptor 1 [Source:MGI Symbol;Acc:MGI:1919949]	retained_intron;protein_coding	1.74464	1.63506	3.60291	1.21102	1.20911	1.4086	1.82374	0.866903	0.0575633	1	up	no
ENSMUSG00000086796	4932702P03Rik	ENSMUST00000151220;ENSMUST00000225028;ENSMUST00000138447	NA	NA	NA	NA	RIKEN cDNA 4932702P03 gene [Source:MGI Symbol;Acc:MGI:1921673]	antisense	0.266447	0.190312	0.344354	0.00143966	0.156015	0.109622	2.99956	1.58475	0.0579319	1	up	no
ENSMUSG00000024462	Gabbr1	ENSMUST00000025338;ENSMUST00000174181;ENSMUST00000172792;ENSMUST00000174456;ENSMUST00000173823;ENSMUST00000172789;ENSMUST00000173564;ENSMUST00000174347;ENSMUST00000174071;ENSMUST00000174866;ENSMUST00000174826	GO:0001649(osteoblast differentiation);GO:0004888(transmembrane signaling receptor activity);GO:0004930(G protein-coupled receptor activity);GO:0004965(G protein-coupled GABA receptor activity);GO:0005515(protein binding);GO:0005615(extracellular space);GO:0005737(cytoplasm);GO:0005789(endoplasmic reticulum membrane);GO:0005886(plasma membrane);GO:0005887(integral component of plasma membrane);GO…	04024(cAMP signaling pathway);04080(Neuroactive ligand-receptor interaction);04727(GABAergic synapse);04742(Taste transduction);04915(Estrogen signaling pathway);05032(Morphine addiction);05032(Morphine addiction)	K04615	NA	gamma-aminobutyric acid (GABA) B receptor, 1 [Source:MGI Symbol;Acc:MGI:1860139]	protein_coding;retained_intron;nonsense_mediated_decay;processed_transcript	13.9663	13.043	10.8587	9.37546	9.5618	9.23513	1.34415	0.426697	0.0580737	1	up	no
ENSMUSG00000096617	Gm5559	ENSMUST00000180755	NA	NA	NA	NA	predicted gene 5559 [Source:MGI Symbol;Acc:MGI:3779498]	processed_pseudogene	106.664	94.3216	122.357	143.738	143.27	137.029	0.762536	-0.391123	0.0582122	1	down	no
ENSMUSG00000046785	Epm2aip1	ENSMUST00000060711;ENSMUST00000135807;ENSMUST00000200053	GO:0005515(protein binding);GO:0005634(nucleus);GO:0005737(cytoplasm);GO:0005783(endoplasmic reticulum);GO:0032868(response to insulin);GO:0042802(identical protein binding);GO:0045725(positive regulation of glycogen biosynthetic process);GO:0098554(cytoplasmic side of endoplasmic reticulum membrane);GO:2000467(positive regulation of glycogen (starch) synthase activity);GO:2000467(positive regula…	NA	NA	NA	EPM2A (laforin) interacting protein 1 [Source:MGI Symbol;Acc:MGI:1925031]	protein_coding;processed_transcript	9.54413	9.76222	9.76095	7.87211	7.98029	4.39628	1.43551	0.521568	0.0588092	1	up	no
ENSMUSG00000082414	Gm13303	ENSMUST00000117125	NA	NA	NA	NA	predicted gene 13303 [Source:MGI Symbol;Acc:MGI:3705775]	unprocessed_pseudogene	1.91495	3.72789	1.19036	0.990592	1.36183	1.09001	1.98499	0.989132	0.0589199	1	up	no
ENSMUSG00000086606	Gm13205	ENSMUST00000123548	NA	NA	NA	NA	predicted gene 13205 [Source:MGI Symbol;Acc:MGI:3700976]	antisense	1.83319	1.61684	2.35512	3.79873	2.80601	4.22307	0.536132	-0.899339	0.0590982	1	down	no
ENSMUSG00000041025	Iffo2	ENSMUST00000174078;ENSMUST00000123827;ENSMUST00000040023	GO:0003674(molecular_function);GO:0005575(cellular_component);GO:0005882(intermediate filament);GO:0008150(biological_process);GO:0008150(biological_process)	NA	NA	NA	intermediate filament family orphan 2 [Source:MGI Symbol;Acc:MGI:2140675]	protein_coding	5.09576	1.86039	6.50895	2.09546	1.80721	3.78233	1.75213	0.809107	0.0591116	1	up	no
ENSMUSG00000002227	Mov10	ENSMUST00000002297;ENSMUST00000168015;ENSMUST00000166979;ENSMUST00000136148;ENSMUST00000196211;ENSMUST00000145414;ENSMUST00000106774;ENSMUST00000196161;ENSMUST00000106775	GO:0000166(nucleotide binding);GO:0000932(P-body);GO:0003723(RNA binding);GO:0003724(RNA helicase activity);GO:0004386(helicase activity);GO:0005515(protein binding);GO:0005524(ATP binding);GO:0005634(nucleus);GO:0005737(cytoplasm);GO:0005829(cytosol);GO:0010494(cytoplasmic stress granule);GO:0010526(negative regulation of transposition, RNA-mediated);GO:0016787(hydrolase activity);GO:0019034(vir…	NA	K18422	EC:3.6.4.13	Mov10 RISC complex RNA helicase [Source:MGI Symbol;Acc:MGI:97054]	protein_coding;nonsense_mediated_decay;retained_intron;processed_transcript	11.6927	11.7409	8.53145	12.1974	14.1716	14.9065	0.774431	-0.368792	0.0594768	1	down	no
ENSMUSG00000025650	Col7a1	ENSMUST00000112070;ENSMUST00000127905;ENSMUST00000026740;ENSMUST00000126780;ENSMUST00000192424;ENSMUST00000149142;ENSMUST00000198997;ENSMUST00000138588	GO:0004867(serine-type endopeptidase inhibitor activity);GO:0005515(protein binding);GO:0005576(extracellular region);GO:0005581(collagen trimer);GO:0005604(basement membrane);GO:0005615(extracellular space);GO:0007155(cell adhesion);GO:0010466(negative regulation of peptidase activity);GO:0010951(negative regulation of endopeptidase activity);GO:0030020(extracellular matrix structural constituen…	04974(Protein digestion and absorption);04974(Protein digestion and absorption)	K16628	NA	collagen, type VII, alpha 1 [Source:MGI Symbol;Acc:MGI:88462]	protein_coding;retained_intron	0.202492	2.37454	0.331291	0.343605	0.472593	0.323185	2.55254	1.35194	0.0597913	1	up	no
ENSMUSG00000072704	Smim10l1	ENSMUST00000100864;ENSMUST00000186945;ENSMUST00000187237;ENSMUST00000191462	GO:0003674(molecular_function);GO:0005575(cellular_component);GO:0008150(biological_process);GO:0008150(biological_process)	NA	NA	NA	small integral membrane protein 10 like 1 [Source:MGI Symbol;Acc:MGI:1914379]	protein_coding;nonsense_mediated_decay	12.92	13.3098	14.5225	8.30535	9.59692	11.315	1.3948	0.480057	0.0598823	1	up	no
ENSMUSG00000035239	Neu3	ENSMUST00000036331	GO:0004308(exo-alpha-sialidase activity);GO:0005737(cytoplasm);GO:0005886(plasma membrane);GO:0005975(carbohydrate metabolic process);GO:0006629(lipid metabolic process);GO:0006689(ganglioside catabolic process);GO:0008152(metabolic process);GO:0009313(oligosaccharide catabolic process);GO:0016020(membrane);GO:0016042(lipid catabolic process);GO:0016787(hydrolase activity);GO:0016798(hydrolase ac…	00511(Other glycan degradation);00600(Sphingolipid metabolism)	K12357	EC:3.2.1.18	neuraminidase 3 [Source:MGI Symbol;Acc:MGI:1355305]	protein_coding	12.9899	16.4443	8.61675	14.9934	14.3836	23.7697	0.715961	-0.482046	0.0599619	1	down	no
ENSMUSG00000050556	Kcnb1	ENSMUST00000207917;ENSMUST00000059826;ENSMUST00000148226;ENSMUST00000144351	GO:0000149(SNARE binding);GO:0001508(action potential);GO:0005216(ion channel activity);GO:0005244(voltage-gated ion channel activity);GO:0005249(voltage-gated potassium channel activity);GO:0005251(delayed rectifier potassium channel activity);GO:0005267(potassium channel activity);GO:0005515(protein binding);GO:0005783(endoplasmic reticulum);GO:0005886(plasma membrane);GO:0006811(ion transport)…	NA	K04885	NA	potassium voltage gated channel, Shab-related subfamily, member 1 [Source:MGI Symbol;Acc:MGI:96666]	protein_coding;processed_transcript	0.846279	0.870926	0.423023	0.460503	0.423997	0.337831	1.75094	0.808128	0.059968	1	up	no
ENSMUSG00000058579	Cela2a	ENSMUST00000102481;ENSMUST00000127962;ENSMUST00000155826	GO:0004175(endopeptidase activity);GO:0004252(serine-type endopeptidase activity);GO:0005576(extracellular region);GO:0005615(extracellular space);GO:0006508(proteolysis);GO:0008233(peptidase activity);GO:0008236(serine-type peptidase activity);GO:0016787(hydrolase activity);GO:0017171(serine hydrolase activity);GO:0032868(response to insulin);GO:0036457(keratohyalin granule);GO:0050796(regulatio…	04972(Pancreatic secretion);04974(Protein digestion and absorption);04974(Protein digestion and absorption)	K01346	EC:3.4.21.71	chymotrypsin-like elastase family, member 2A [Source:MGI Symbol;Acc:MGI:95316]	protein_coding;retained_intron	0.436137	0.706474	0.285743	0.757806	0.951714	1.07668	0.512653	-0.963944	0.0601393	1	down	no
ENSMUSG00000032332	Col12a1	ENSMUST00000071750;ENSMUST00000135009;ENSMUST00000150289;ENSMUST00000121227;ENSMUST00000122827;ENSMUST00000141667	GO:0005515(protein binding);GO:0005576(extracellular region);GO:0005581(collagen trimer);GO:0005595(collagen type XII trimer);GO:0005615(extracellular space);GO:0007155(cell adhesion);GO:0030020(extracellular matrix structural constituent conferring tensile strength);GO:0035987(endodermal cell differentiation);GO:0062023(collagen-containing extracellular matrix);GO:0062023(collagen-containing ext…	04974(Protein digestion and absorption);04974(Protein digestion and absorption)	K08132	NA	collagen, type XII, alpha 1 [Source:MGI Symbol;Acc:MGI:88448]	protein_coding;retained_intron	3.46739	3.4335	2.48844	3.58637	5.19942	3.71432	0.75114	-0.412846	0.0601768	1	down	no
ENSMUSG00000030222	Rerg	ENSMUST00000032347;ENSMUST00000117919;ENSMUST00000119610;ENSMUST00000203003;ENSMUST00000149100	GO:0000166(nucleotide binding);GO:0003924(GTPase activity);GO:0005525(GTP binding);GO:0005634(nucleus);GO:0005737(cytoplasm);GO:0005829(cytosol);GO:0005886(plasma membrane);GO:0007165(signal transduction);GO:0007265(Ras protein signal transduction);GO:0008285(negative regulation of cell population proliferation);GO:0009725(response to hormone);GO:0016020(membrane);GO:0016787(hydrolase activity);G…	NA	K07855	NA	RAS-like, estrogen-regulated, growth-inhibitor [Source:MGI Symbol;Acc:MGI:2665139]	protein_coding	35.8948	26.8366	31.9946	19.8528	12.638	31.9253	1.47053	0.556341	0.0602718	1	up	no
ENSMUSG00000023945	Slc5a7	ENSMUST00000233507;ENSMUST00000095712;ENSMUST00000233758	GO:0005307(choline:sodium symporter activity);GO:0005515(protein binding);GO:0005769(early endosome);GO:0005886(plasma membrane);GO:0006811(ion transport);GO:0006814(sodium ion transport);GO:0007271(synaptic transmission, cholinergic);GO:0007274(neuromuscular synaptic transmission);GO:0008021(synaptic vesicle);GO:0008292(acetylcholine biosynthetic process);GO:0015220(choline transmembrane transpo…	04725(Cholinergic synapse);05231(Choline metabolism in cancer);05231(Choline metabolism in cancer)	K14387	NA	solute carrier family 5 (choline transporter), member 7 [Source:MGI Symbol;Acc:MGI:1927126]	retained_intron;protein_coding	0.0663442	0.141341	0.137299	0.14188	0.200497	0.37547	0.480583	-1.05714	0.0604838	1	down	no
ENSMUSG00000031262	Cenpi	ENSMUST00000144678;ENSMUST00000125604;ENSMUST00000101251;ENSMUST00000081064;ENSMUST00000129782	GO:0000775(chromosome, centromeric region);GO:0000776(kinetochore);GO:0003674(molecular_function);GO:0005634(nucleus);GO:0005694(chromosome);GO:0005829(cytosol);GO:0008150(biological_process);GO:0016604(nuclear body);GO:0034508(centromere complex assembly);GO:0034508(centromere complex assembly)	NA	K11501	NA	centromere protein I [Source:MGI Symbol;Acc:MGI:2147897]	processed_transcript;protein_coding	1.43991	0.81224	1.32648	1.75055	1.68677	2.31316	0.622318	-0.684276	0.0605582	1	down	no
ENSMUSG00000056394	Lig1	ENSMUST00000185145;ENSMUST00000165964;ENSMUST00000123846;ENSMUST00000098814;ENSMUST00000156525;ENSMUST00000131294;ENSMUST00000147735;ENSMUST00000146998;ENSMUST00000148471;ENSMUST00000123025;ENSMUST00000177588;ENSMUST00000138453	GO:0000166(nucleotide binding);GO:0003677(DNA binding);GO:0003909(DNA ligase activity);GO:0003910(DNA ligase (ATP) activity);GO:0005524(ATP binding);GO:0005654(nucleoplasm);GO:0006260(DNA replication);GO:0006266(DNA ligation);GO:0006281(DNA repair);GO:0006284(base-excision repair);GO:0006310(DNA recombination);GO:0006974(cellular response to DNA damage stimulus);GO:0016874(ligase activity);GO:004…	03030(DNA replication);03410(Base excision repair);03420(Nucleotide excision repair);03430(Mismatch repair);03430(Mismatch repair)	K10747	6.5.1.6;6.5.1.7;EC:6.5.1.1	ligase I, DNA, ATP-dependent [Source:MGI Symbol;Acc:MGI:101789]	protein_coding;processed_transcript;retained_intron	12.9463	12.6035	12.3044	15.2329	15.3014	18.3313	0.774659	-0.368366	0.0605955	1	down	no
ENSMUSG00000033597	Caskin1	ENSMUST00000235032;ENSMUST00000024958;ENSMUST00000234171;ENSMUST00000234717;ENSMUST00000234030	GO:0005515(protein binding);GO:0005737(cytoplasm);GO:0007165(signal transduction);GO:0016020(membrane);GO:0019904(protein domain specific binding);GO:0042802(identical protein binding);GO:0042802(identical protein binding)	NA	K21952	NA	CASK interacting protein 1 [Source:MGI Symbol;Acc:MGI:2442952]	retained_intron;protein_coding	8.64719	9.58014	5.85196	5.41879	5.89276	6.18462	1.37626	0.460753	0.0606748	1	up	no
ENSMUSG00000106535	Gm43031	ENSMUST00000198500	NA	NA	NA	NA	predicted gene 43031 [Source:MGI Symbol;Acc:MGI:5663168]	sense_intronic	0.749808	0.493228	1.09016	0.25378	0.518962	0.36925	2.04309	1.03075	0.0609132	1	up	no
ENSMUSG00000039936	Pik3cd	ENSMUST00000105688;ENSMUST00000118704;ENSMUST00000038859;ENSMUST00000122059;ENSMUST00000105690;ENSMUST00000105689;ENSMUST00000137430;ENSMUST00000146612;ENSMUST00000177654;ENSMUST00000134534;ENSMUST00000127273;ENSMUST00000156309;ENSMUST00000131224;ENSMUST00000124510	GO:0000166(nucleotide binding);GO:0001782(B cell homeostasis);GO:0002250(adaptive immune response);GO:0002376(immune system process);GO:0005524(ATP binding);GO:0005737(cytoplasm);GO:0005829(cytosol);GO:0005886(plasma membrane);GO:0005942(phosphatidylinositol 3-kinase complex);GO:0006935(chemotaxis);GO:0006954(inflammatory response);GO:0007166(cell surface receptor signaling pathway);GO:0010628(po…	00562(Inositol phosphate metabolism);01521(EGFR tyrosine kinase inhibitor resistance);01522(Endocrine resistance);01524(Platinum drug resistance);04012(ErbB signaling pathway);04014(Ras signaling pathway);04015(Rap1 signaling pathway);04024(cAMP signaling pathway);04062(Chemokine signaling pathway);04066(HIF-1 signaling pathway);04068(FoxO signaling pathway);04070(Phosphatidylinositol signaling s…	K00922	EC:2.7.1.153	phosphatidylinositol-4,5-bisphosphate 3-kinase catalytic subunit delta [Source:MGI Symbol;Acc:MGI:1098211]	protein_coding;processed_transcript	6.21829	7.73629	6.7744	5.96861	9.86646	13.2193	0.713454	-0.487108	0.0611392	1	down	no
ENSMUSG00000060572	Mfap2	ENSMUST00000071977;ENSMUST00000124506;ENSMUST00000166376	GO:0001527(microfibril);GO:0005576(extracellular region);GO:0048048(embryonic eye morphogenesis);GO:0048050(post-embryonic eye morphogenesis);GO:0048050(post-embryonic eye morphogenesis)	NA	NA	NA	microfibrillar-associated protein 2 [Source:MGI Symbol;Acc:MGI:99559]	protein_coding;processed_transcript	89.7571	89.2257	67.9742	91.932	108.886	120.631	0.768262	-0.38033	0.0612111	1	down	no
ENSMUSG00000025172	Ankrd2	ENSMUST00000238137;ENSMUST00000026172	GO:0000122(negative regulation of transcription by RNA polymerase II);GO:0000791(euchromatin);GO:0001817(regulation of cytokine production);GO:0003682(chromatin binding);GO:0005515(protein binding);GO:0005634(nucleus);GO:0005737(cytoplasm);GO:0005829(cytosol);GO:0006357(regulation of transcription by RNA polymerase II);GO:0010832(negative regulation of myotube differentiation);GO:0016605(PML body…	NA	K21434	NA	ankyrin repeat domain 2 (stretch responsive muscle) [Source:MGI Symbol;Acc:MGI:1861447]	protein_coding	0.994103	0.255954	1.31284	0.373939	0.290755	0.43892	2.32227	1.21554	0.0612502	1	up	no
ENSMUSG00000021186	Fbln5	ENSMUST00000021603;ENSMUST00000221373;ENSMUST00000222587	GO:0000122(negative regulation of transcription by RNA polymerase II);GO:0001558(regulation of cell growth);GO:0005178(integrin binding);GO:0005509(calcium ion binding);GO:0005576(extracellular region);GO:0005615(extracellular space);GO:0007155(cell adhesion);GO:0008022(protein C-terminus binding);GO:0016525(negative regulation of angiogenesis);GO:0030023(extracellular matrix constituent conferri…	NA	K17340	NA	fibulin 5 [Source:MGI Symbol;Acc:MGI:1346091]	protein_coding;retained_intron	3.99724	3.98553	2.01777	4.4671	4.17243	5.84483	0.690437	-0.534418	0.0613457	1	down	no
ENSMUSG00000024423	Impact	ENSMUST00000025290;ENSMUST00000234488;ENSMUST00000234409;ENSMUST00000235053;ENSMUST00000235079;ENSMUST00000234793;ENSMUST00000234035;ENSMUST00000234369;ENSMUST00000234763	GO:0000122(negative regulation of transcription by RNA polymerase II);GO:0001933(negative regulation of protein phosphorylation);GO:0003779(actin binding);GO:0004860(protein kinase inhibitor activity);GO:0005515(protein binding);GO:0005737(cytoplasm);GO:0005844(polysome);GO:0006417(regulation of translation);GO:0006446(regulation of translational initiation);GO:0006469(negative regulation of prot…	NA	NA	NA	impact, RWD domain protein [Source:MGI Symbol;Acc:MGI:1098233]	protein_coding;retained_intron;processed_transcript;nonsense_mediated_decay	8.12925	7.70376	9.1799	5.77111	6.40488	5.87057	1.38602	0.470949	0.0613932	1	up	no
ENSMUSG00000039770	Ypel5	ENSMUST00000045174;ENSMUST00000233210;ENSMUST00000233662;ENSMUST00000233221;ENSMUST00000233886	GO:0000151(ubiquitin ligase complex);GO:0000922(spindle pole);GO:0003674(molecular_function);GO:0005634(nucleus);GO:0005737(cytoplasm);GO:0005813(centrosome);GO:0005815(microtubule organizing center);GO:0005856(cytoskeleton);GO:0008150(biological_process);GO:0008283(cell population proliferation);GO:0030496(midbody);GO:0046872(metal ion binding);GO:0097431(mitotic spindle pole);GO:0097431(mitotic…	NA	NA	NA	yippee like 5 [Source:MGI Symbol;Acc:MGI:1916937]	protein_coding	4.3637	12.0515	4.21224	4.3112	4.31747	3.58286	1.68918	0.756319	0.0614555	1	up	no
ENSMUSG00000026341	Actr3	ENSMUST00000186008;ENSMUST00000188362;ENSMUST00000178474;ENSMUST00000027579;ENSMUST00000191004;ENSMUST00000188497;ENSMUST00000188827;ENSMUST00000187460;ENSMUST00000189192;ENSMUST00000191544;ENSMUST00000185280;ENSMUST00000191578	GO:0000139(Golgi membrane);GO:0000166(nucleotide binding);GO:0001726(ruffle);GO:0002102(podosome);GO:0003779(actin binding);GO:0005200(structural constituent of cytoskeleton);GO:0005515(protein binding);GO:0005524(ATP binding);GO:0005634(nucleus);GO:0005737(cytoplasm);GO:0005856(cytoskeleton);GO:0005884(actin filament);GO:0005885(Arp2/3 protein complex);GO:0005903(brush border);GO:0005911(cell-ce…	04530(Tight junction);04530(Tight junction)	K18584	NA	ARP3 actin-related protein 3 [Source:MGI Symbol;Acc:MGI:1921367]	retained_intron;protein_coding;nonsense_mediated_decay	34.2681	35.6798	26.4918	23.9797	24.1197	23.6047	1.34497	0.427572	0.0615422	1	up	no
ENSMUSG00000039405	Prss23	ENSMUST00000208888;ENSMUST00000207932;ENSMUST00000041761;ENSMUST00000208402;ENSMUST00000207538;ENSMUST00000207636;ENSMUST00000209118;ENSMUST00000208903	GO:0004252(serine-type endopeptidase activity);GO:0005576(extracellular region);GO:0005615(extracellular space);GO:0005634(nucleus);GO:0006508(proteolysis);GO:0008233(peptidase activity);GO:0008236(serine-type peptidase activity);GO:0016787(hydrolase activity);GO:0016787(hydrolase activity)	NA	K09627	EC:3.4.21.-	protease, serine 23 [Source:MGI Symbol;Acc:MGI:1923703]	protein_coding;processed_transcript	64.2355	59.794	43.9889	56.9501	69.5893	103.754	0.729584	-0.454853	0.0615523	1	down	no
ENSMUSG00000067931	Zfp948	ENSMUST00000088787	GO:0003676(nucleic acid binding);GO:0006355(regulation of transcription, DNA-templated);GO:0046872(metal ion binding)	05168(Herpes simplex virus 1 infection)	K09228	NA	zinc finger protein 948 [Source:MGI Symbol;Acc:MGI:3040683]	protein_coding	3.35884	3.70305	4.10505	2.32971	1.74127	2.79366	1.62673	0.701979	0.0617423	1	up	no
ENSMUSG00000002228	Ppm1j	ENSMUST00000002298;ENSMUST00000197264	GO:0003824(catalytic activity);GO:0004721(phosphoprotein phosphatase activity);GO:0004722(protein serine/threonine phosphatase activity);GO:0004724(magnesium-dependent protein serine/threonine phosphatase activity);GO:0005515(protein binding);GO:0006470(protein dephosphorylation);GO:0016787(hydrolase activity);GO:0016787(hydrolase activity)	NA	K17504	EC:3.1.3.16	protein phosphatase 1J [Source:MGI Symbol;Acc:MGI:1919137]	protein_coding;retained_intron	0.541912	0.803934	0.832566	0.440428	0.391884	0.230738	2.04921	1.03507	0.0619071	1	up	no
ENSMUSG00000074876	Spata5l1	ENSMUST00000152813	NA	NA	NA	NA	spermatogenesis associated 5-like 1 [Source:MGI Symbol;Acc:MGI:3036261]	processed_transcript	2.17321	3.5503	2.1478	4.02251	3.85	5.11206	0.606205	-0.722122	0.0619312	1	down	no
ENSMUSG00000066551	Hmgb1	ENSMUST00000085546;ENSMUST00000093196;ENSMUST00000123645;ENSMUST00000110505;ENSMUST00000155086;ENSMUST00000138553;ENSMUST00000202133;ENSMUST00000133667;ENSMUST00000125605;ENSMUST00000139443	GO:0000122(negative regulation of transcription by RNA polymerase II);GO:0000400(four-way junction DNA binding);GO:0000401(open form four-way junction DNA binding);GO:0000402(crossed form four-way junction DNA binding);GO:0000405(bubble DNA binding);GO:0000790(nuclear chromatin);GO:0000793(condensed chromosome);GO:0000976(transcription regulatory region sequence-specific DNA binding);GO:0001530(l…	03410(Base excision repair);04140(Autophagy - animal);04217(Necroptosis);04217(Necroptosis)	K10802	NA	high mobility group box 1 [Source:MGI Symbol;Acc:MGI:96113]	protein_coding;retained_intron	13.5296	10.6756	12.5943	11.5173	25.4215	14.7975	0.711289	-0.491492	0.0621207	1	down	no
ENSMUSG00000021678	F2rl1	ENSMUST00000022185	GO:0001965(G-protein alpha-subunit binding);GO:0002286(T cell activation involved in immune response);GO:0002376(immune system process);GO:0002690(positive regulation of leukocyte chemotaxis);GO:0002720(positive regulation of cytokine production involved in immune response);GO:0003104(positive regulation of glomerular filtration);GO:0004930(G protein-coupled receptor activity);GO:0005769(early en…	04080(Neuroactive ligand-receptor interaction);04750(Inflammatory mediator regulation of TRP channels);05143(African trypanosomiasis)	NA	NA	coagulation factor II (thrombin) receptor-like 1 [Source:MGI Symbol;Acc:MGI:101910]	protein_coding	0.73472	0.766124	0.531881	0.370907	0.235054	0.43521	1.95235	0.965208	0.0622405	1	up	no
ENSMUSG00000072980	Oip5	ENSMUST00000123818;ENSMUST00000110805	GO:0000775(chromosome, centromeric region);GO:0000785(chromatin);GO:0005634(nucleus);GO:0005694(chromosome);GO:0007049(cell cycle);GO:0007059(chromosome segregation);GO:0010369(chromocenter);GO:0015030(Cajal body);GO:0016607(nuclear speck);GO:0034080(CENP-A containing nucleosome assembly);GO:0042802(identical protein binding);GO:0043231(intracellular membrane-bounded organelle);GO:0046872(metal i…	NA	K11565	NA	Opa interacting protein 5 [Source:MGI Symbol;Acc:MGI:1917895]	protein_coding;retained_intron	2.88503	3.57879	2.32364	4.09404	4.35153	5.52667	0.628923	-0.669045	0.0623957	1	down	no
ENSMUSG00000037846	Rtkn2	ENSMUST00000118160;ENSMUST00000147556;ENSMUST00000105437;ENSMUST00000117086;ENSMUST00000068994;ENSMUST00000123147	GO:0003674(molecular_function);GO:0005634(nucleus);GO:0005737(cytoplasm);GO:0005886(plasma membrane);GO:0007165(signal transduction);GO:0008284(positive regulation of cell population proliferation);GO:0030097(hemopoiesis);GO:0051092(positive regulation of NF-kappaB transcription factor activity);GO:1901224(positive regulation of NIK/NF-kappaB signaling);GO:2001243(negative regulation of intrinsic…	NA	NA	NA	rhotekin 2 [Source:MGI Symbol;Acc:MGI:2158417]	protein_coding;nonsense_mediated_decay;processed_transcript	0.30841	0.381972	0.246126	0.508371	0.414174	0.73826	0.563888	-0.826519	0.0625245	1	down	no
ENSMUSG00000023004	Tuba1b	ENSMUST00000077577;ENSMUST00000140969	GO:0000166(nucleotide binding);GO:0000226(microtubule cytoskeleton organization);GO:0000278(mitotic cell cycle);GO:0003725(double-stranded RNA binding);GO:0003924(GTPase activity);GO:0005200(structural constituent of cytoskeleton);GO:0005515(protein binding);GO:0005525(GTP binding);GO:0005737(cytoplasm);GO:0005829(cytosol);GO:0005856(cytoskeleton);GO:0005874(microtubule);GO:0005881(cytoplasmic mi…	04145(Phagosome);04210(Apoptosis);04530(Tight junction);04540(Gap junction);04540(Gap junction)	K07374	NA	tubulin, alpha 1B [Source:MGI Symbol;Acc:MGI:107804]	protein_coding;retained_intron	271.33	272.412	295.963	355.367	351.178	386.355	0.768328	-0.380206	0.0630045	1	down	no
ENSMUSG00000050271	Prag1	ENSMUST00000110492;ENSMUST00000150295;ENSMUST00000145386	GO:0004672(protein kinase activity);GO:0005515(protein binding);GO:0005524(ATP binding);GO:0005634(nucleus);GO:0005737(cytoplasm);GO:0005925(focal adhesion);GO:0006468(protein phosphorylation);GO:0008360(regulation of cell shape);GO:0008593(regulation of Notch signaling pathway);GO:0010977(negative regulation of neuron projection development);GO:0016477(cell migration);GO:0030054(cell junction);G…	NA	K17537	EC:2.7.10.2	PEAK1 related kinase activating pseudokinase 1 [Source:MGI Symbol;Acc:MGI:1196223]	protein_coding;retained_intron	3.11901	3.99872	3.44378	4.60345	5.06015	4.36203	0.753015	-0.40925	0.0631335	1	down	no
ENSMUSG00000036896	C1qc	ENSMUST00000046332;ENSMUST00000153104	GO:0002376(immune system process);GO:0005515(protein binding);GO:0005576(extracellular region);GO:0005581(collagen trimer);GO:0005615(extracellular space);GO:0006958(complement activation, classical pathway);GO:0030853(negative regulation of granulocyte differentiation);GO:0045087(innate immune response);GO:0045202(synapse);GO:0045650(negative regulation of macrophage differentiation);GO:0098794(…	04610(Complement and coagulation cascades);05020(Prion diseases);05133(Pertussis);05142(Chagas disease (American trypanosomiasis));05150(Staphylococcus aureus infection);05322(Systemic lupus erythematosus);05322(Systemic lupus erythematosus)	K03988	NA	complement component 1, q subcomponent, C chain [Source:MGI Symbol;Acc:MGI:88225]	protein_coding;processed_transcript	28.9735	29.2504	26.7901	35.6693	53.4157	26.9134	0.732889	-0.448334	0.0631619	1	down	no
ENSMUSG00000066362	Rps13-ps1	ENSMUST00000183478	NA	NA	NA	NA	ribosomal protein S13, pseudogene 1 [Source:MGI Symbol;Acc:MGI:3647042]	processed_pseudogene	21.6193	17.1169	13.7049	34.5784	34.7336	15.1094	0.621182	-0.686912	0.0632639	1	down	no
ENSMUSG00000012443	Kif11	ENSMUST00000012587;ENSMUST00000236027	GO:0000166(nucleotide binding);GO:0000922(spindle pole);GO:0003777(microtubule motor activity);GO:0005524(ATP binding);GO:0005634(nucleus);GO:0005737(cytoplasm);GO:0005819(spindle);GO:0005829(cytosol);GO:0005856(cytoskeleton);GO:0005874(microtubule);GO:0005876(spindle microtubule);GO:0007018(microtubule-based movement);GO:0007049(cell cycle);GO:0007051(spindle organization);GO:0007100(mitotic cen…	NA	K10398	NA	kinesin family member 11 [Source:MGI Symbol;Acc:MGI:1098231]	protein_coding;retained_intron	3.78181	3.0042	3.10986	3.79804	3.6496	6.82057	0.693561	-0.527904	0.0636358	1	down	no
ENSMUSG00000078139	AK157302	ENSMUST00000104942	GO:0005198(structural molecule activity);GO:0005737(cytoplasm);GO:0005739(mitochondrion);GO:0016226(iron-sulfur cluster assembly);GO:0051536(iron-sulfur cluster binding);GO:0051537(2 iron, 2 sulfur cluster binding);GO:0097428(protein maturation by iron-sulfur cluster transfer)	NA	NA	NA	cDNA sequence AK157302 [Source:MGI Symbol;Acc:MGI:3574096]	protein_coding	2.60156	2.5791	1.13849	1.67919	0.514106	0.877794	2.05763	1.04098	0.0639029	1	up	no
ENSMUSG00000024590	Lmnb1	ENSMUST00000025486;ENSMUST00000128651	GO:0003690(double-stranded DNA binding);GO:0005634(nucleus);GO:0005635(nuclear envelope);GO:0005637(nuclear inner membrane);GO:0005638(lamin filament);GO:0005652(nuclear lamina);GO:0005654(nucleoplasm);GO:0005737(cytoplasm);GO:0005882(intermediate filament);GO:0008432(JUN kinase binding);GO:0010971(positive regulation of G2/M transition of mitotic cell cycle);GO:0016020(membrane);GO:0016363(nucle…	04210(Apoptosis);04210(Apoptosis)	K07611	NA	lamin B1 [Source:MGI Symbol;Acc:MGI:96795]	protein_coding;retained_intron	27.4169	24.6367	32.3781	35.0824	30.9828	46.8072	0.748028	-0.418835	0.0639041	1	down	no
ENSMUSG00000028068	Iqgap3	ENSMUST00000071812;ENSMUST00000195465;ENSMUST00000193861;ENSMUST00000194772;ENSMUST00000193940;ENSMUST00000194440	GO:0000082(G1/S transition of mitotic cell cycle);GO:0000187(activation of MAPK activity);GO:0001934(positive regulation of protein phosphorylation);GO:0005515(protein binding);GO:0005516(calmodulin binding);GO:0005737(cytoplasm);GO:0005911(cell-cell junction);GO:0007165(signal transduction);GO:0007265(Ras protein signal transduction);GO:0008361(regulation of cell size);GO:0010628(positive regula…	04810(Regulation of actin cytoskeleton);04810(Regulation of actin cytoskeleton)	K05767	NA	IQ motif containing GTPase activating protein 3 [Source:MGI Symbol;Acc:MGI:3028642]	protein_coding;nonsense_mediated_decay;retained_intron	1.5401	1.48267	1.4658	1.87311	1.83584	2.69893	0.700476	-0.513592	0.0639615	1	down	no
ENSMUSG00000028656	Cap1	ENSMUST00000069533;ENSMUST00000106255;ENSMUST00000106257;ENSMUST00000140783;ENSMUST00000150919;ENSMUST00000128485;ENSMUST00000151041	GO:0000902(cell morphogenesis);GO:0001667(ameboidal-type cell migration);GO:0003779(actin binding);GO:0005515(protein binding);GO:0005576(extracellular region);GO:0005737(cytoplasm);GO:0005829(cytosol);GO:0005886(plasma membrane);GO:0006898(receptor-mediated endocytosis);GO:0007010(cytoskeleton organization);GO:0007163(establishment or maintenance of cell polarity);GO:0008154(actin polymerization…	NA	K17261	NA	CAP, adenylate cyclase-associated protein 1 (yeast) [Source:MGI Symbol;Acc:MGI:88262]	protein_coding;processed_transcript	30.5897	31.5277	30.6284	70.7363	30.4893	32.6801	0.692621	-0.529862	0.0639832	1	down	no
ENSMUSG00000025825	Iscu	ENSMUST00000134881;ENSMUST00000112312;ENSMUST00000026937;ENSMUST00000112311;ENSMUST00000145592;ENSMUST00000145778;ENSMUST00000123616	GO:0005506(iron ion binding);GO:0005737(cytoplasm);GO:0005739(mitochondrion);GO:0005759(mitochondrial matrix);GO:0005829(cytosol);GO:0006879(cellular iron ion homeostasis);GO:0008198(ferrous iron binding);GO:0016226(iron-sulfur cluster assembly);GO:0046872(metal ion binding);GO:0051536(iron-sulfur cluster binding);GO:0051537(2 iron, 2 sulfur cluster binding);GO:0051539(4 iron, 4 sulfur cluster bi…	NA	K22068	NA	iron-sulfur cluster assembly enzyme [Source:MGI Symbol;Acc:MGI:1913633]	nonsense_mediated_decay;protein_coding	47.5641	45.0162	28.7343	28.1594	33.4053	26.7793	1.37321	0.45755	0.0642508	1	up	no
ENSMUSG00000049775	Tmsb4x	ENSMUST00000112172;ENSMUST00000112176;ENSMUST00000112175	GO:0003779(actin binding);GO:0003785(actin monomer binding);GO:0005515(protein binding);GO:0005634(nucleus);GO:0005737(cytoplasm);GO:0005829(cytosol);GO:0005856(cytoskeleton);GO:0007015(actin filament organization);GO:0014911(positive regulation of smooth muscle cell migration);GO:0030334(regulation of cell migration);GO:0042989(sequestering of actin monomers);GO:0045893(positive regulation of tr…	04810(Regulation of actin cytoskeleton);04810(Regulation of actin cytoskeleton)	K05764	NA	thymosin, beta 4, X chromosome [Source:MGI Symbol;Acc:MGI:99510]	protein_coding	215.364	276.031	169.836	154.808	184.927	133.798	1.39638	0.481687	0.0644568	1	up	no
ENSMUSG00000047613	A430005L14Rik	ENSMUST00000128457;ENSMUST00000058393;ENSMUST00000147826;ENSMUST00000141493;ENSMUST00000105645;ENSMUST00000133524;ENSMUST00000139967	GO:0003674(molecular_function);GO:0005634(nucleus);GO:0005654(nucleoplasm);GO:0008150(biological_process);GO:0008150(biological_process)	NA	NA	NA	RIKEN cDNA A430005L14 gene [Source:MGI Symbol;Acc:MGI:2140680]	retained_intron;protein_coding;nonsense_mediated_decay;processed_transcript	10.9507	10.9534	11.4204	14.419	16.1741	16.1055	0.71361	-0.486791	0.0649726	1	down	no
ENSMUSG00000083012	Fam220a	ENSMUST00000200267;ENSMUST00000196487;ENSMUST00000198982;ENSMUST00000198994	GO:0000122(negative regulation of transcription by RNA polymerase II);GO:0005515(protein binding);GO:0005634(nucleus);GO:0006470(protein dephosphorylation);GO:0032092(positive regulation of protein binding);GO:0097677(STAT family protein binding);GO:0097677(STAT family protein binding)	NA	NA	NA	family with sequence similarity 220, member A [Source:MGI Symbol;Acc:MGI:1914488]	protein_coding;retained_intron;processed_transcript	2.47257	2.53845	2.11561	2.18532	0.995895	0.409156	1.98493	0.989087	0.0652141	1	up	no
ENSMUSG00000078429	Ctdsp2	ENSMUST00000105255;ENSMUST00000105256;ENSMUST00000219917;ENSMUST00000217738	GO:0001933(negative regulation of protein phosphorylation);GO:0004721(phosphoprotein phosphatase activity);GO:0005575(cellular_component);GO:0005634(nucleus);GO:0006470(protein dephosphorylation);GO:0008420(RNA polymerase II CTD heptapeptide repeat phosphatase activity);GO:0016311(dephosphorylation);GO:0016787(hydrolase activity);GO:0016791(phosphatase activity);GO:0046872(metal ion binding);GO:2…	NA	K15731	EC:3.1.3.16	CTD (carboxy-terminal domain, RNA polymerase II, polypeptide A) small phosphatase 2 [Source:MGI Symbol;Acc:MGI:1098748]	protein_coding;processed_transcript;retained_intron	18.7354	72.8488	16.8189	20.6551	22.9216	17.2079	1.78339	0.834626	0.0653703	1	up	no
ENSMUSG00000062488	Ifit3b	ENSMUST00000076249	GO:0003723(RNA binding);GO:0005515(protein binding);GO:0005737(cytoplasm);GO:0005739(mitochondrion);GO:0005829(cytosol);GO:0035457(cellular response to interferon-alpha);GO:0042802(identical protein binding);GO:0051607(defense response to virus)	NA	NA	NA	interferon-induced protein with tetratricopeptide repeats 3B [Source:MGI Symbol;Acc:MGI:3698419]	protein_coding	1.88377	1.76268	1.60145	0.887728	1.03516	1.08486	1.7448	0.803059	0.0657016	1	up	no
ENSMUSG00000019880	Rspo3	ENSMUST00000092623;ENSMUST00000215256	GO:0001525(angiogenesis);GO:0001974(blood vessel remodeling);GO:0002040(sprouting angiogenesis);GO:0005102(signaling receptor binding);GO:0005109(frizzled binding);GO:0005576(extracellular region);GO:0008201(heparin binding);GO:0016055(Wnt signaling pathway);GO:0030177(positive regulation of Wnt signaling pathway);GO:0050896(response to stimulus);GO:0060173(limb development);GO:0060670(branching …	04310(Wnt signaling pathway);04310(Wnt signaling pathway)	K23098	NA	R-spondin 3 [Source:MGI Symbol;Acc:MGI:1920030]	protein_coding	0.88795	1.05403	0.311839	0.412076	0.369115	0.322339	2.04237	1.03024	0.065777	1	up	no
ENSMUSG00000040195	Nemp1	ENSMUST00000048099;ENSMUST00000118612;ENSMUST00000124388;ENSMUST00000142580;ENSMUST00000133505;ENSMUST00000118728	GO:0005515(protein binding);GO:0005634(nucleus);GO:0005635(nuclear envelope);GO:0005637(nuclear inner membrane);GO:0008150(biological_process);GO:0016020(membrane);GO:0016021(integral component of membrane);GO:0016021(integral component of membrane)	NA	NA	NA	nuclear envelope integral membrane protein 1 [Source:MGI Symbol;Acc:MGI:2446113]	protein_coding;processed_transcript	3.00621	3.1621	2.25274	3.35321	3.73037	4.5815	0.721902	-0.470125	0.0659189	1	down	no
ENSMUSG00000039187	Fanci	ENSMUST00000036865;ENSMUST00000132091;ENSMUST00000137667;ENSMUST00000206121;ENSMUST00000126456;ENSMUST00000118959;ENSMUST00000205817	GO:0005634(nucleus);GO:0005654(nucleoplasm);GO:0005829(cytosol);GO:0006281(DNA repair);GO:0006974(cellular response to DNA damage stimulus);GO:0007049(cell cycle);GO:0031398(positive regulation of protein ubiquitination);GO:0043240(Fanconi anaemia nuclear complex);GO:0070182(DNA polymerase binding);GO:0070182(DNA polymerase binding)	03460(Fanconi anemia pathway);03460(Fanconi anemia pathway)	K10895	NA	Fanconi anemia, complementation group I [Source:MGI Symbol;Acc:MGI:2384790]	protein_coding;nonsense_mediated_decay	2.32609	1.54617	2.22111	2.61131	2.66943	3.9346	0.661221	-0.596795	0.0659554	1	down	no
ENSMUSG00000101970	1810026B05Rik	ENSMUST00000189960;ENSMUST00000187421;ENSMUST00000184587;ENSMUST00000183916;ENSMUST00000190028;ENSMUST00000184655;ENSMUST00000184855;ENSMUST00000184554	NA	NA	NA	NA	RIKEN cDNA 1810026B05 gene [Source:MGI Symbol;Acc:MGI:1916420]	retained_intron;lincRNA	3.05381	3.57419	2.961	1.66113	2.84715	1.93084	1.48918	0.574517	0.0661306	1	up	no
ENSMUSG00000073424	Cyp4f15	ENSMUST00000167789;ENSMUST00000008801;ENSMUST00000168171;ENSMUST00000163907	GO:0004497(monooxygenase activity);GO:0005506(iron ion binding);GO:0008391(arachidonic acid monooxygenase activity);GO:0016491(oxidoreductase activity);GO:0016705(oxidoreductase activity, acting on paired donors, with incorporation or reduction of molecular oxygen);GO:0019369(arachidonic acid metabolic process);GO:0020037(heme binding);GO:0036101(leukotriene B4 catabolic process);GO:0042361(menaq…	NA	K00490	EC:1.14.14.1	cytochrome P450, family 4, subfamily f, polypeptide 15 [Source:MGI Symbol;Acc:MGI:2146921]	retained_intron;protein_coding;processed_transcript	0.305347	0.41732	0.193171	0.422318	1.08462	0.371576	0.487534	-1.03643	0.0661582	1	down	no
ENSMUSG00000057098	Ebf1	ENSMUST00000081265;ENSMUST00000140822;ENSMUST00000149997;ENSMUST00000101326;ENSMUST00000138452;ENSMUST00000109268;ENSMUST00000135993	GO:0000978(RNA polymerase II cis-regulatory region sequence-specific DNA binding);GO:0001228(DNA-binding transcription activator activity, RNA polymerase II-specific);GO:0003677(DNA binding);GO:0003700(DNA-binding transcription factor activity);GO:0005515(protein binding);GO:0005634(nucleus);GO:0005654(nucleoplasm);GO:0006355(regulation of transcription, DNA-templated);GO:0007275(multicellular or…	NA	K09103	NA	early B cell factor 1 [Source:MGI Symbol;Acc:MGI:95275]	protein_coding;processed_transcript	0.396101	0.376685	0.586769	0.195964	0.212005	0.352157	1.78859	0.838825	0.0661664	1	up	no
ENSMUSG00000027460	Angpt4	ENSMUST00000028955	GO:0001525(angiogenesis);GO:0005102(signaling receptor binding);GO:0005172(vascular endothelial growth factor receptor binding);GO:0005576(extracellular region);GO:0005615(extracellular space);GO:0007165(signal transduction);GO:0007171(activation of transmembrane receptor protein tyrosine kinase activity);GO:0007219(Notch signaling pathway);GO:0007492(endoderm development);GO:0010595(positive reg…	04010(MAPK signaling pathway);04014(Ras signaling pathway);04015(Rap1 signaling pathway);04066(HIF-1 signaling pathway);04151(PI3K-Akt signaling pathway)	K05467	NA	angiopoietin 4 [Source:MGI Symbol;Acc:MGI:1336887]	protein_coding	4.20598	5.10035	4.00535	4.63725	8.38967	7.06891	0.66241	-0.594204	0.0662451	1	down	no
ENSMUSG00000039055	Eme1	ENSMUST00000128643;ENSMUST00000039949;ENSMUST00000128447;ENSMUST00000127158	GO:0000712(resolution of meiotic recombination intermediates);GO:0000790(nuclear chromatin);GO:0003677(DNA binding);GO:0004518(nuclease activity);GO:0004519(endonuclease activity);GO:0005515(protein binding);GO:0005634(nucleus);GO:0005720(nuclear heterochromatin);GO:0005730(nucleolus);GO:0006281(DNA repair);GO:0006302(double-strand break repair);GO:0006310(DNA recombination);GO:0006974(cellular r…	03440(Homologous recombination);03460(Fanconi anemia pathway);03460(Fanconi anemia pathway)	K10882	EC:3.1.22.-	essential meiotic structure-specific endonuclease 1 [Source:MGI Symbol;Acc:MGI:3576783]	processed_transcript;protein_coding	1.7452	1.43564	1.44555	2.68939	1.85903	2.9647	0.615775	-0.699525	0.0662929	1	down	no
ENSMUSG00000032254	Kif23	ENSMUST00000216717;ENSMUST00000216812;ENSMUST00000034815;ENSMUST00000214295;ENSMUST00000214940;ENSMUST00000213159;ENSMUST00000215965;ENSMUST00000215743;ENSMUST00000215319;ENSMUST00000213595;ENSMUST00000215404;ENSMUST00000216746	GO:0000166(nucleotide binding);GO:0000281(mitotic cytokinesis);GO:0000915(actomyosin contractile ring assembly);GO:0003774(motor activity);GO:0003777(microtubule motor activity);GO:0005524(ATP binding);GO:0005634(nucleus);GO:0005654(nucleoplasm);GO:0005737(cytoplasm);GO:0005813(centrosome);GO:0005819(spindle);GO:0005856(cytoskeleton);GO:0005871(kinesin complex);GO:0005874(microtubule);GO:0007018(…	05206(MicroRNAs in cancer);05206(MicroRNAs in cancer)	K17387	NA	kinesin family member 23 [Source:MGI Symbol;Acc:MGI:1919069]	retained_intron;processed_transcript;protein_coding	3.20277	2.41089	2.39682	3.27862	3.2696	4.74805	0.709127	-0.495884	0.0664106	1	down	no
ENSMUSG00000045733	Sprn	ENSMUST00000059241;ENSMUST00000156791	GO:0003676(nucleic acid binding);GO:0005634(nucleus);GO:0005730(nucleolus);GO:0005829(cytosol);GO:0005886(plasma membrane);GO:0006606(protein import into nucleus);GO:0016020(membrane);GO:0031225(anchored component of membrane);GO:0031982(vesicle);GO:0031982(vesicle)	NA	NA	NA	shadow of prion protein [Source:MGI Symbol;Acc:MGI:3582583]	protein_coding	1.2086	1.63629	1.9233	2.56407	4.69144	1.28299	0.558434	-0.840542	0.0664687	1	down	no
ENSMUSG00000024235	Map3k8	ENSMUST00000173708;ENSMUST00000025078;ENSMUST00000105472;ENSMUST00000173930;ENSMUST00000172805	GO:0000165(MAPK cascade);GO:0000166(nucleotide binding);GO:0000186(activation of MAPKK activity);GO:0000287(magnesium ion binding);GO:0002376(immune system process);GO:0004672(protein kinase activity);GO:0004674(protein serine/threonine kinase activity);GO:0004709(MAP kinase kinase kinase activity);GO:0005524(ATP binding);GO:0005737(cytoplasm);GO:0005829(cytosol);GO:0006468(protein phosphorylatio…	04010(MAPK signaling pathway);04620(Toll-like receptor signaling pathway);04660(T cell receptor signaling pathway);04668(TNF signaling pathway);04668(TNF signaling pathway)	K04415	EC:2.7.11.25	mitogen-activated protein kinase kinase kinase 8 [Source:MGI Symbol;Acc:MGI:1346878]	retained_intron;protein_coding;processed_transcript;nonsense_mediated_decay	1.17332	1.06063	1.59386	0.732379	0.931548	0.528528	1.7459	0.803971	0.0666238	1	up	no
ENSMUSG00000112907	Gm47015	ENSMUST00000217947	NA	NA	NA	NA	predicted gene, 47015 [Source:MGI Symbol;Acc:MGI:6095697]	lincRNA	0.27632	0.588362	1.03363	0.283022	0.36866	0.253744	2.09659	1.06804	0.066639	1	up	no
ENSMUSG00000031958	Ldhd	ENSMUST00000070004;ENSMUST00000173521;ENSMUST00000173909	GO:0003824(catalytic activity);GO:0004458(D-lactate dehydrogenase (cytochrome) activity);GO:0005515(protein binding);GO:0005739(mitochondrion);GO:0005743(mitochondrial inner membrane);GO:0006754(ATP biosynthetic process);GO:0008720(D-lactate dehydrogenase activity);GO:0016491(oxidoreductase activity);GO:0050660(flavin adenine dinucleotide binding);GO:0055114(oxidation-reduction process);GO:007194…	00620(Pyruvate metabolism);00620(Pyruvate metabolism)	K00102	EC:1.1.2.4	lactate dehydrogenase D [Source:MGI Symbol;Acc:MGI:106428]	protein_coding;retained_intron	4.58371	3.79193	5.24931	3.49203	2.64847	3.06192	1.48058	0.566167	0.0668036	1	up	no
ENSMUSG00000066798	Zbtb6	ENSMUST00000112932;ENSMUST00000053098	GO:0000978(RNA polymerase II cis-regulatory region sequence-specific DNA binding);GO:0003676(nucleic acid binding);GO:0003677(DNA binding);GO:0005515(protein binding);GO:0005634(nucleus);GO:0005654(nucleoplasm);GO:0005739(mitochondrion);GO:0006357(regulation of transcription by RNA polymerase II);GO:0046872(metal ion binding);GO:0046872(metal ion binding)	NA	K10493	NA	zinc finger and BTB domain containing 6 [Source:MGI Symbol;Acc:MGI:2442998]	protein_coding	4.10284	3.75746	4.26207	2.69313	1.93501	3.39052	1.51177	0.596237	0.0669544	1	up	no
ENSMUSG00000066878	Gm10184	ENSMUST00000086423	GO:0005515(protein binding);GO:0005634(nucleus);GO:0005654(nucleoplasm);GO:0005737(cytoplasm);GO:0005829(cytosol);GO:0006606(protein import into nucleus);GO:0006607(NLS-bearing protein import into nucleus);GO:0008139(nuclear localization sequence binding);GO:0010494(cytoplasmic stress granule);GO:0015031(protein transport);GO:0042025(host cell nucleus);GO:0042826(histone deacetylase binding);GO:0…	NA	NA	NA	predicted pseudogene 10184 [Source:MGI Symbol;Acc:MGI:3704480]	protein_coding	2.03684	2.0461	5.04263	6.58392	4.09254	5.27571	0.572059	-0.805765	0.0671373	1	down	no
[truncated: 54,792 more rows]

## Sheet: Sheet2
gene_id	gene_name	transcript_id	GO	KEGG	KO_ENTRY	EC	Description	trans_type	FPKM.T_O_D_12	FPKM.T_O_D_38	FPKM.T_O_D_44	FPKM.T_O_C_17	FPKM.T_O_C_3	FPKM.T_O_C_9	fc	log2(fc)	pval	qval	regulation	significant
[truncated: 239 more rows]
